# Supplementary material for: Highly diastereo- and enantioselective copper-catalyzed methylboration of 1,2-dihydroquinolines and 2H-chromenes
Source: Royal Society of Chemistry journal article supplement (doi:10.1039/d2qo01620f), 2022-12-09
Supplement: d2qo01620f1.pdf [file d2qo01620f1.pdf]

*Supporting Information for:*

**Highly Diastereo- and Enantioselective Copper-Catalyzed Methylboration of 1,2-Dihydroquinolines and 2H-Chromenes**

Suna Han,<sup>‡</sup> Xin Shen,<sup>‡</sup> Xiaoxue Wu, Chaochao Xie, Guofu Zi, and Guohua Hou\*

Key Laboratory of Radiopharmaceuticals, College of Chemistry, Beijing Normal University,  
Beijing 100875, China

\*ghhou@bnu.edu.cn

<sup>‡</sup>These authors contributed equally.

**Table of contents**

|                                                                        |      |
|------------------------------------------------------------------------|------|
| 1. General Information.....                                            | S2   |
| 2. Preparation of Substrates.....                                      | S2   |
| 3. Copper-Catalyzed Enantioselective Methylboration of Substrates..... | S6   |
| 4. The Characterization Data for Substrates.....                       | S7   |
| 5. The Characterization Data for products.....                         | S13  |
| 6. X-ray Crystallography.....                                          | S27  |
| 7. References.....                                                     | S29  |
| 8. NMR spectra of all compounds.....                                   | S30  |
| 9. SFC and HPLC spectra of all products.....                           | S83  |
| 10. Figures of single-crystals.....                                    | S112 |

## 1. General Information

All the reactions were carried out under a nitrogen atmosphere unless otherwise specified, the air or moisture sensitive reactions and manipulations were performed by using standard Schlenk techniques and in a nitrogen-filled glovebox. DME, THF and toluene were distilled from sodium benzophenone ketyl. DCE was distilled from calcium hydride. Anhydrous MeOH was distilled from magnesium.  $^1\text{H}$  NMR and  $^{13}\text{C}$  NMR spectra were recorded on Bruker AV (400 MHz) spectrometers and JEOL JNM-ECX600P and JNM-ECS600 (600 MHz) spectrometers ( $\text{CDCl}_3$  was the solvent used for the NMR analysis, with TMS as the internal standard. Chemical shifts were reported upfield to TMS (0.00 ppm) for  $^1\text{H}$  NMR. Data is represented as follows: chemical shift, integration, multiplicity (s = singlet, d = doublet, dd = double of doublets, t = triplet, q = quartet, m = multiplet) and coupling constants ( $J$ ) in Hertz (Hz). Optical rotation was determined using Autopol III Automatic polarimeter (Rudolph research Analytical). HPLC analysis was conducted on Agilent 1260 series instrument. SFC analysis was conducted on Agilent 1260 series instrument. HRMS were recorded on a Waters LCT Premier XE mass spectrometer with APCI or ESI.

## 2. Preparation of Substrates

### Preparation of Substrates 1

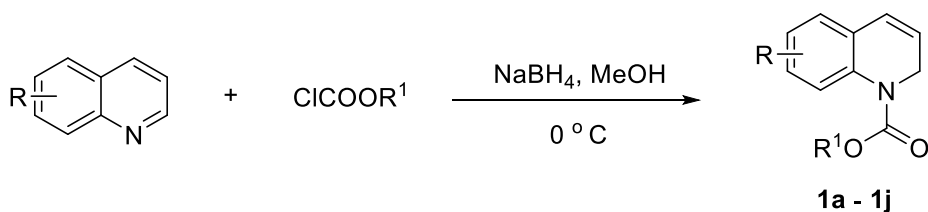

To a solution of quinoline or substituted quinoline (20.0 mmol) in MeOH (30.0 mL) was added dropwise ClCO<sub>2</sub>R (24.0 mmol) at 0 °C under a nitrogen atmosphere, then NaBH<sub>4</sub> (20.0 mmol) was added portionwise at 0 °C over 1 h. The reaction mixture was then allowed to warm to room

temperature. After 2-3 h, the solution was carefully quenched with H<sub>2</sub>O and extracted with EtOAc. The organic layers were dried over MgSO<sub>4</sub>, filtered and evaporated. The residue was purified by silica gel column chromatography using petroleum ether/EtOAc as an eluent (PE/EA/ = 4/1 to 30/1) to give the corresponding 1,2-dihydroquinoline (**1a - 1j**) as light yellow oil, which was immediately used and stored at -30 °C under a nitrogen atmosphere in order to prevent decomposition.<sup>1</sup>

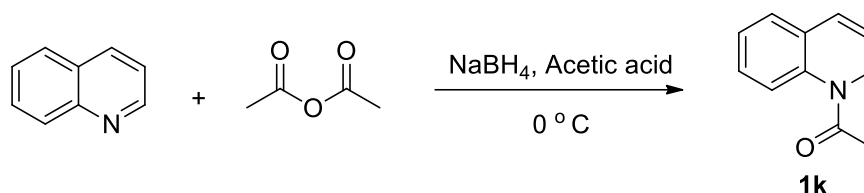

To a mixture of quinoline (10.0 mmol), acetic anhydride (12.0 mL) and acetic acid (40.0 mL) was gradually added NaBH<sub>4</sub> (40.0 mmol) at 0 °C over 1.5 h. After the addition was complete, the reaction mixture was then allowed to warm to room temperature. After 1 h, the reaction mixture was concentrated under vacuum, diluted with H<sub>2</sub>O, neutralized with sodium carbonate and extracted with DCM. The organic layers were dried over MgSO<sub>4</sub>, filtered and evaporated. The residue was purified by silica gel column chromatography using petroleum ether/EtOAc as an eluent (PE/EA/ = 5/1) to give the corresponding 1,2-dihydroquinoline **1f** as a light yellow oil.<sup>2</sup>

### Preparation of Substrates 3

#### a. Procedure for the preparation of 3a.

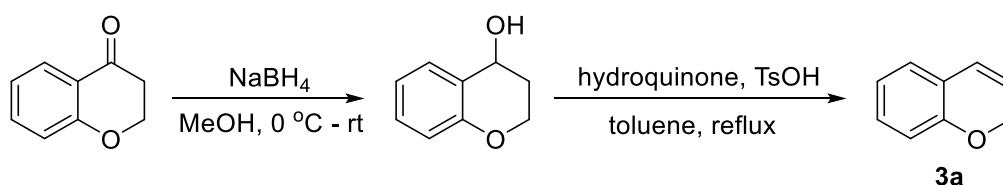

Chroman-4-one (5.0 mmol) was suspended in methanol (50.0 mL) and treated with an excess of NaBH<sub>4</sub> (7.5 mmol) at 0 °C. The resulting mixture was stirred for 30 minutes at room temperature, then concentrated in vacuum. The residue was partitioned between CH<sub>2</sub>Cl<sub>2</sub> and H<sub>2</sub>O. The organic layer was separated, and the aqueous layer was extracted with CH<sub>2</sub>Cl<sub>2</sub>. The organic layers were then

combined, washed with H<sub>2</sub>O, dried over anhydrous Na<sub>2</sub>SO<sub>4</sub>, filtered and concentrated to yield the desired compound.<sup>3</sup>

*p*-Toluenesulfonic acid (3.0 mg) and hydroquinone (5.0 mg) were added to a solution of chroman-4-ol (5.00 mmol) in toluene (20.0 mL). The reaction mixture was heated under reflux using a Dean–Stark trap (2 h), washed with water, dried over anhydrous Na<sub>2</sub>SO<sub>4</sub>, filtered and concentrated under reduced pressure. The residue was purified by silica gel chromatography (petroleum ether).<sup>4</sup>

#### b. Procedure for the preparation of 3b, 3g, 3h, 3i and 3j.

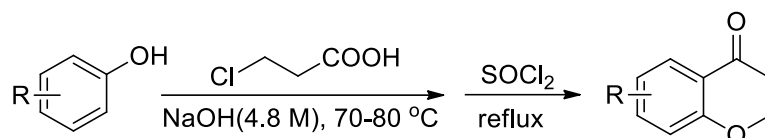

Equimolar quantities of chloropropionic acid (0.05 mol) and appropriate Phenol (0.05 mol) were placed in a conical flask, to which aqueous solution of NaOH (0.12 mol in 25 mL water) was slowly added with constant stirring and then heating to 75 – 80 °C, reacting for 12 h. After the reaction, with sufficient cooling and acidified by adding con. HCl, extracted with ethyl acetate, followed by saturated brine. It was dried over anhydrous Na<sub>2</sub>SO<sub>4</sub> and then solvent was removed. The crude product was purified by silica gel chromatography.<sup>5</sup>

3-Phenoxypropanoic acids were placed in a conical flask, to which sulfoxide chloride was quickly added with constant stirring. The reaction mixture was heated under reflux for 2 h, then concentrated in vacuo and CH<sub>2</sub>Cl<sub>2</sub> was added to the mixture. The aluminum chloride anhydrous was added at 0 °C and the reaction stirred for 1 h at 0 °C, then the reaction mixture was allowed to warm to rt. The reaction was quenched with H<sub>2</sub>O slowly at 0 °C, extracted with CH<sub>2</sub>Cl<sub>2</sub>, followed by saturated brine. It was dried over anhydrous Na<sub>2</sub>SO<sub>4</sub> and then solvent was removed. The crude product was purified by silica gel chromatography (petroleum ether: EtOAc = 7:1); Then according to procedure for the preparation of 3.

#### c. Procedure for the preparation of other substrates.

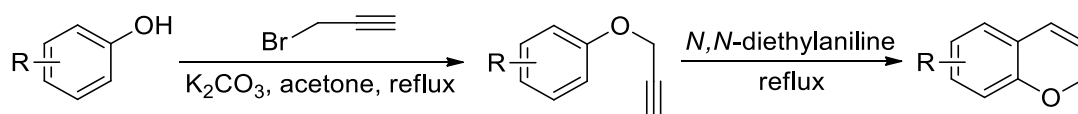

To a solution of phenols (50.0 mmol) in acetone (200 mL) was added K<sub>2</sub>CO<sub>3</sub> (200.0 mmol) and 3-bromoprop-1-yne (60.0 mmol). The resulting mixture was stirred at reflux temperature during

overnight and the reaction stopped by filtration and evaporation under vacuum. The crude product was extracted with  $\text{CH}_2\text{Cl}_2$ , followed by saturated brine. It was dried over anhydrous  $\text{Na}_2\text{SO}_4$  and then solvent was removed. The crude product was purified by silica gel chromatography.<sup>6</sup>

A mixture of (prop-2-yn-1-yloxy) benzene (10.0 mmol) and N, N-diethylaniline (1.6 mL) was refluxed for 8-12 h. After cooling to room temperature, the reaction mixture was diluted with ethyl acetate. The resulting mixture was washed with hydrochloric acid (2M), water and brine, and then dried over anhydrous  $\text{Na}_2\text{SO}_4$ . The solvent was evaporated and the crude product was purified by silica gel chromatography.<sup>6</sup>

**d. Procedure for the preparation of 3k.**

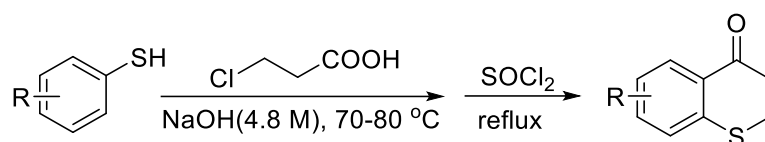

Equimolar quantities of chloropropionic acid (0.05 mol) and appropriate PhenthioI (0.05 mol) were placed in a conical flask, to which aqueous solution of NaOH (0.12 mol in 25 mL water) was slowly added with constant stirring and then heating to 75 – 80 °C, reacting for 12 h. After the reaction, with sufficient cooling and acidified by adding con. HCl, extracted with ethyl acetate, followed by saturated brine. It was dried over anhydrous  $\text{Na}_2\text{SO}_4$  and then solvent was removed. The crude product was purified by silica gel chromatography.

3-(Phenylthio)propanoic acids were placed in a conical flask, to which sulfoxide chloride was quickly added with constant stirring. The reaction mixture was heated under reflux for 2 h, then concentrated in vacuo and  $\text{CH}_2\text{Cl}_2$  was added to the mixture. The aluminum chloride anhydrous was added at 0 °C and the reaction stirred for 1 h at 0 °C, then the reaction mixture was allowed to warm to rt. The reaction was quenched with  $\text{H}_2\text{O}$  slowly at 0 °C, extracted with  $\text{CH}_2\text{Cl}_2$ , followed by saturated brine. It was dried over anhydrous  $\text{Na}_2\text{SO}_4$  and then solvent was removed. The crude product was purified by silica gel chromatography (petroleum ether: EtOAc = 7:1); Then according to procedure for the preparation of **3**.

### 3. Copper-Catalyzed Enantioselective Methylboration of Substrates

#### a. Copper-Catalyzed Enantioselective Methylboration of Substrates 1

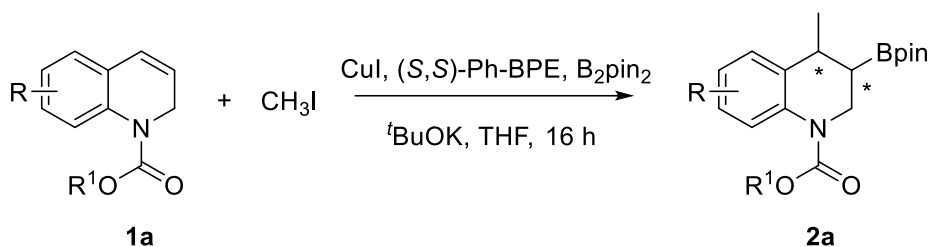

In a nitrogen-filled glovebox, CuI (3.8 mg, 0.02 mmol, 10 mol%), (S,S)-Ph-BPE (12.2mg, 0.024 mmol, 12 mol%) and THF (1 mL), then the mixture was stirred 30 minutes at room temperature. To the mixture was added B<sub>2</sub>pin<sub>2</sub> (76.2 mg, 0.3 mmol, 1.5 equiv) and **1** (0.20 mmol, 1 equiv), CH<sub>3</sub>I (85.2 mg, 0.6 mmol, 3 equiv) and <sup>t</sup>BuOK (33.7 mg, 0.3 mmol, 1.5 equiv) successively. After that, 0.5 mL of THF was added along the vial's wall to keep all reacts into the reaction solution. The vial was sealed with a rubber stopper, removed from the glovebox and stirred at room temperature for 16 hours. Upon completion of the reaction, the reaction mixture was passed through a short silica gel column eluting with Et<sub>2</sub>O. The solvent was removed under vacuo, and the residue was purified by column chromatography on silica gel using petroleum ether/EtOAc as an eluent (PE/EA/ = 10/1 to 20/1) to give the corresponding borylation products **2**. The ee values of **2** were determined by HPLC or SFC analysis on a chiral stationary phase, the dr were determined by NMR analysis.

#### b. Copper-Catalyzed Enantioselective Methylboration of substrates 3

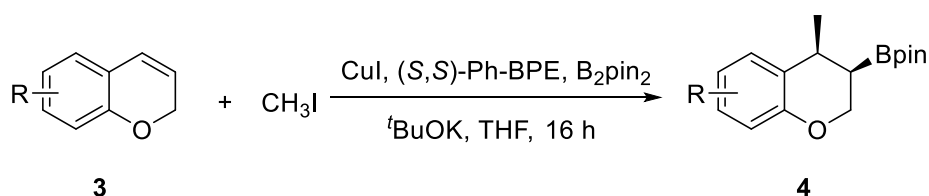

In a nitrogen-filled glovebox, CuI (3.8 mg, 0.02 mmol, 10 mol%), (S,S)-Ph-BPE (12.2mg, 0.024 mmol, 12 mol%) and THF (1 mL), then the mixture was stirred 30 minutes at room

temperature. To the mixture was added B<sub>2</sub>pin<sub>2</sub> (76.2 mg, 0.3 mmol, 1.5equiv) and **3** (0.20 mmol, 1 equiv), CH<sub>3</sub>I (85.2 mg, 0.6 mmol, 3 equiv) and <sup>t</sup>BuOK (33.7 mg, 0.3 mmol, 1.5 equiv) successively. After that, 0.5 mL of THF was added along the vial's wall to keep all reacts into the reaction solution. The vial was sealed with a rubber stopper, removed from the glovebox and stirred at room temperature for 16 hours. Upon completion of the reaction, the reaction mixture was passed through a short silica gel column eluting with Et<sub>2</sub>O. The solvent was removed under vacuo, and the residue was purified by column chromatography on silica gel using petroleum ether/EtOAc as an eluent (PE/EtOAc = 20/1 to 100/1) to give the corresponding borylation products **4**. The ee values of **4** were determined by HPLC or SFC analysis on a chiral stationary phase, the dr were determined by NMR analysis.

#### 4. The Characterization Data for Substrates

##### Methyl quinoline-1(2*H*)-carboxylate (**1a**)

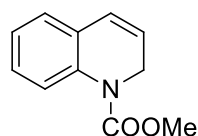

1.03 g, yield: 27%; <sup>1</sup>H NMR (CDCl<sub>3</sub>, 600 MHz) δ: 7.57 (d, *J* = 7.2 Hz, 1H), 7.26-7.18 (m, 1H), 7.09-7.05 (m, 2H), 6.49 (d, *J* = 9.6 Hz, 1H), 6.02-5.98 (m, 1H), 4.41 (dd, *J* = 4.2 Hz, 1.8 Hz, 2H), 3.79 (s, 3H). <sup>13</sup>C NMR (CDCl<sub>3</sub>, 150 MHz) δ: 154.8, 136.4, 128.1, 127.5, 126.5, 126.4, 125.6, 124.5, 123.7, 53.1, 43.6.

##### Methyl 6-methylquinoline-1(2*H*)-carboxylate (**1b**)

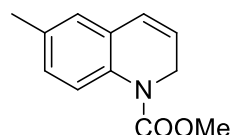

1.09 g, yield: 26%; <sup>1</sup>H NMR (CDCl<sub>3</sub>, 600 MHz) δ: 7.44 (s, 1 H), 7.00 (dd, *J* = 8.2, 1.6 Hz, 1 H), 6.87 (s, 1 H), 6.43 (d, *J* = 9.5 Hz, 1 H), 5.97 (dt, *J* = 8.7, 3.8 Hz, 1 H), 4.38 (dd, *J* = 4.1, 1.7 Hz, 2 H), 3.77 (s, 3 H), 2.29 (s, 3 H). <sup>13</sup>C NMR (CDCl<sub>3</sub>, 150 MHz) δ: 154.9, 134.1, 133.9, 128.1, 126.9, 126.5, 123.5, 53.1, 43.6, 20.9.

### Methyl 7-methylquinoline-1(2H)-carboxylate (1c)

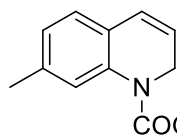

1.1 g, yield: 27%;  $^1\text{H NMR}$  ( $\text{CDCl}_3$ , 400 MHz)  $\delta$ : 7.32 (s, 1 H), 6.85 (d,  $J = 7.7$  Hz, 1 H), 6.79 (d,  $J = 7.8$  Hz, 1 H), 6.36 (d,  $J = 9.5$  Hz, 1 H), 5.83 (dt,  $J = 9.0, 4.1$  Hz, 1 H), 4.28 (d,  $J = 3.7$  Hz, 2 H), 3.69 (s, 3 H), 2.25 (s, 3 H).  $^{13}\text{C NMR}$  ( $\text{CDCl}_3$ , 150 MHz)  $\delta$ : 154.9, 137.5, 136.3, 126.4, 126.2, 125.5, 125.3, 124.2, 53.1, 43.6, 21.7.

### Methyl 6-methoxyquinoline-1(2H)-carboxylate (1d)

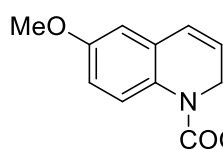

0.92 g, yield: 21%;  $^1\text{H NMR}$  ( $\text{CDCl}_3$ , 400 MHz)  $\delta$ : 7.46 (s, 1H), 6.75 (dd,  $J = 11.8$  Hz, 2.9 Hz, 1H), 6.60 (d,  $J = 2.9$  Hz, 1H), 6.44 (d,  $J = 9.6$  Hz, 1H), 6.04-5.99 (m, 1H), 4.37 (dd,  $J = 4.1$  Hz, 1.7 Hz, 2H), 3.77 (d,  $J = 5.2$  Hz, 6H).  $^{13}\text{C NMR}$  ( $\text{CDCl}_3$ , 100 MHz)  $\delta$ : 156.9, 155.4, 130.0, 129.7, 127.0, 125.3, 113.3, 111.7, 56.0, 53.5, 44.0.

### Methyl 6-bromoquinoline-1(2H)-carboxylate (1e)

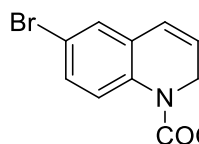

0.54 g, yield: 10%;  $^1\text{H NMR}$  ( $\text{CDCl}_3$ , 400 MHz)  $\delta$ : 7.46 (d,  $J = 8.0$  Hz, 1H), 7.27 (dd,  $J = 8.7$  Hz, 2.3 Hz, 1H), 7.16 (d,  $J = 2.3$  Hz, 1H), 6.38 (d,  $J = 9.6$  Hz, 1H), 6.03-5.98 (m, 1H), 4.38 (dd,  $J = 4.2$  Hz, 1.8 Hz, 2H), 3.78 (s, 3H).  $^{13}\text{C NMR}$  ( $\text{CDCl}_3$ , 100 MHz)  $\delta$ : 155.0, 135.8, 130.6, 130.3, 129.4, 127.4, 125.9, 125.7, 117.7, 53.7, 44.0.

### Methyl 7-bromoquinoline-1(2H)-carboxylate (1f)

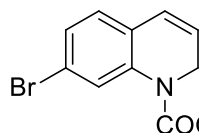

0.97 g, yield: 18%;  $^1\text{H NMR}$  ( $\text{CDCl}_3$ , 400 MHz)  $\delta$ : 7.78 (s, 1H), 7.16 (dd,  $J = 8.1$  Hz, 2.0 Hz, 1H), 6.88 (d,  $J = 8.1$  Hz, 1H), 6.41 (d,  $J = 9.6$  Hz, 1H), 6.00-5.95 (m, 1H), 4.37 (dd,  $J = 4.2$  Hz, 1.8 Hz, 2H), 3.79 (s, 3H).  $^{13}\text{C NMR}$  ( $\text{CDCl}_3$ , 100 MHz)  $\delta$ : 154.9, 137.9, 128.0, 127.9, 127.2, 126.9, 126.2, 121.2, 53.8, 44.1.



### Isopropyl quinoline-1(2*H*)-carboxylate (1g)

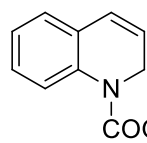

0.61 g, yield: 14%; <sup>1</sup>H NMR (CDCl<sub>3</sub>, 400 MHz)  $\delta$ : 7.60 (d,  $J$  = 8.1 Hz, 1H), 7.26-7.15 (m, 1H), 7.04 (d,  $J$  = 4.1 Hz, 2H), 6.47 (dd,  $J$  = 9.4, 1.4 Hz, 1H), 6.01-5.96 (m, 1H), 5.08-5.02 (m, 1H), 4.42-4.39 (m, 2H), 1.31 (d,  $J$  = 6.3 Hz, 6H). <sup>13</sup>C NMR (CDCl<sub>3</sub>, 100 MHz)  $\delta$ : 154.4, 137.1, 128.5, 127.8, 127.0, 126.8, 126.1, 124.7, 124.1, 70.3, 43.8, 22.6.

### Isobutyl quinoline-1(2*H*)-carboxylate (1h)

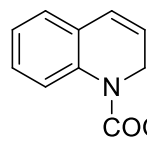

0.51 g, yield: 11%; <sup>1</sup>H NMR (CDCl<sub>3</sub>, 400 MHz)  $\delta$ : 7.59 (d,  $J$  = 8.0 Hz, 1H), 7.21-7.17 (m, 1H), 7.08-7.04 (m, 2H), 6.48 (dt,  $J$  = 9.5 Hz, 1.4 Hz, 1H), 6.02-5.98 (m, 1H), 4.42 (dd,  $J$  = 4.2 Hz, 1.8 Hz, 2H), 3.98 (d,  $J$  = 6.6 Hz, 2H), 2.03-1.93 (m, 1H), 0.95 (d,  $J$  = 6.7 Hz, 6H). <sup>13</sup>C NMR (CDCl<sub>3</sub>, 100 MHz)  $\delta$ : 154.9, 137.0, 128.5, 127.8, 127.0, 126.8, 126.1, 124.8, 124.2, 72.8, 43.9, 28.4, 19.7.

### Phenyl quinoline-1(2*H*)-carboxylate (1i)

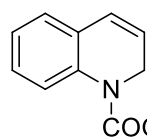

2.3 g, yield: 46%; <sup>1</sup>H NMR (CDCl<sub>3</sub>, 400 MHz)  $\delta$ : 7.72 (s, 1H), 7.42-7.38 (m, 2H), 7.26-7.12 (m, 6H), 6.58 (dd,  $J$  = 9.6 Hz, 1.3 Hz, 1H), 6.11-6.06 (m, 1H), 4.56 (s, 2H). <sup>13</sup>C NMR (CDCl<sub>3</sub>, 100 MHz)  $\delta$ : 153.2, 151.6, 136.5, 129.9, 128.8, 128.1, 127.1, 127.0, 126.2, 125.5, 124.3, 122.2, 44.4.

### Benzyl quinoline-1(2*H*)-carboxylate (1j)

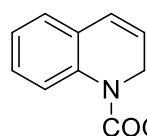

1.65 g, yield: 31%; <sup>1</sup>H NMR (CDCl<sub>3</sub>, 400 MHz)  $\delta$ : 7.68 (d,  $J$  = 6.6 Hz, 1H), 7.45-7.34 (m, 5H), 7.26-7.21 (m, 1H), 7.13-7.08 (m, 2H), 6.52 (d,  $J$  = 9.6 Hz, 1H), 6.03-5.99 (m, 1H), 5.29 (s, 2H), 4.47 (dd,  $J$  = 4.2 Hz, 1.8 Hz, 2H). <sup>13</sup>C NMR (CDCl<sub>3</sub>, 100 MHz)  $\delta$ : 154.7, 136.9, 136.8, 129.2, 128.8, 128.7, 128.6, 128.0, 127.0, 126.9, 126.0, 125.1, 124.3, 68.3,

44.2.

**1-(Quinolin-1(2H)-yl)ethanone (1k)**

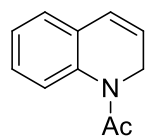

1.02 g, yield: 59%;  $^1\text{H NMR}$  ( $\text{CDCl}_3$ , 600 MHz)  $\delta$ : 7.28-7.11 (m, 4H), 6.53 (d,  $J = 9.5$  Hz, 1H), 6.10-6.09 (m, 1H), 4.47 (s, 2H), 2.21 (s, 3H).  $^{13}\text{C NMR}$  ( $\text{CDCl}_3$ , 150

MHz)  $\delta$ : 170.1, 137.1, 129.4, 128.3, 127.2, 126.5, 126.2, 125.7, 123.9, 41.4, 22.5.

**2H-chromene (3a)**

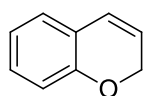

0.5 g, 75% yield;  $^1\text{H NMR}$  (600 MHz,  $\text{CDCl}_3$ )  $\delta$ : 6.67 (t,  $J = 6.2$  Hz, 1H), 6.56 (d,  $J = 6.0$  Hz, 1H), 6.50 – 6.47 (m, 1H), 6.41 (d,  $J = 6.3$  Hz, 1H), 6.13 (dd,  $J = 7.8, 0.9$

Hz, 1H), 5.63 – 5.59 (m, 1H), 4.85 (dt,  $J = 2.6, 1.2$  Hz, 2H).  $^{13}\text{C NMR}$  (100 MHz,  $\text{CDCl}_3$ )  $\delta$ : 143.3,

123.4, 121.3, 119.7, 118.0, 117.6, 117.1, 112.6, 72.5.

**8-methyl-2H-chromene (3b)**

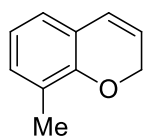

0.62 g, 85% yield;  $^1\text{H NMR}$  (400 MHz,  $\text{CDCl}_3$ )  $\delta$ : 6.87 (d,  $J = 7.2$  Hz, 1H), 6.75 – 6.60 (m, 2H), 6.31 (dt,  $J = 9.8, 1.7$  Hz, 1H), 5.66 (dt,  $J = 9.8, 3.5$  Hz, 1H), 4.74 (dd,

$J = 3.5, 1.8$  Hz, 2H), 2.07 (s, 3H).  $^{13}\text{C NMR}$  (100 MHz,  $\text{CDCl}_3$ )  $\delta$ : 152.0, 130.7, 125.0, 124.9, 124.3,

121.9, 121.6, 120.6, 65.4.

**8-isopropyl-2H-chromene (3c)**

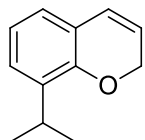

1.24 g, 71% yield;  $^1\text{H NMR}$  (400 MHz,  $\text{CDCl}_3$ )  $\delta$ : 7.03 (dd,  $J = 7.1, 2.1$  Hz, 1H), 6.83 – 6.75 (m, 2H), 6.39 (dt,  $J = 9.8, 1.7$  Hz, 1H), 5.73 (dt,  $J = 9.7, 3.6$  Hz, 1H),

4.75 (dd,  $J = 3.6, 1.7$  Hz, 2H), 3.27 – 3.12 (m, 1H), 1.19 (s, 1H), 1.18 (s, 6H).  $^{13}\text{C NMR}$  (100 MHz,

$\text{CDCl}_3$ )  $\delta$ : 151.1, 135.8, 126.1, 125.3, 124.2, 122.3, 121.8, 121.0, 65.3, 26.7, 22.6.

### 8-(*tert*-butyl)-2*H*-chromene (3d)

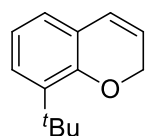

1.47 g, 78% yield;  $^1\text{H NMR}$  (400 MHz,  $\text{CDCl}_3$ )  $\delta$ : 7.14 – 6.90 (m, 1H), 6.90 – 6.67 (m, 2H), 6.37 (d,  $J = 9.7$  Hz, 1H), 5.75 (dt,  $J = 9.4, 3.5$  Hz, 1H), 4.84 – 4.29 (m, 2H),

1.30 (s, 9H).  $^{13}\text{C NMR}$  (100 MHz,  $\text{CDCl}_3$ )  $\delta$ : 150.4, 132.0, 126.0, 125.2, 124.4, 122.5, 121.4, 119.0, 64.3, 34.4, 29.7.

### 8-methoxy-2*H*-chromene (3e)

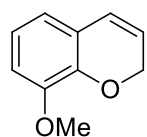

1.12 g, 69% yield;  $^1\text{H NMR}$  (400 MHz,  $\text{CDCl}_3$ )  $\delta$ : 6.88 – 6.68 (m, 2H), 6.59 (dd,  $J = 7.1, 1.4$  Hz, 1H), 6.39 (d,  $J = 9.8$  Hz, 1H), 5.76 (dt,  $J = 9.7, 3.5$  Hz, 1H), 4.86 (dd,  $J = 3.4, 1.8$  Hz, 2H), 3.84 (s, 3H).  $^{13}\text{C NMR}$  (100 MHz,  $\text{CDCl}_3$ )  $\delta$ : 147.6, 142.7, 124.5, 123.0, 122.0,

120.8, 118.9, 112.0, 65.7, 55.9.

### 8-phenyl-2*H*-chromene (3f)

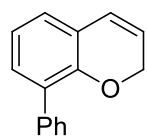

1.58g, 76% yield;  $^1\text{H NMR}$  (400 MHz,  $\text{CDCl}_3$ )  $\delta$ : 7.57 – 7.51 (m, 2H), 7.46 – 7.38 (m, 2H), 7.36 – 7.30 (m, 1H), 7.18 (dd,  $J = 7.1, 2.2$  Hz, 1H), 7.01 – 6.90 (m, 2H),

6.49 (dt,  $J = 9.8, 1.8$  Hz, 1H), 5.82 (dt,  $J = 9.8, 3.6$  Hz, 1H), 4.80 (dd,  $J = 3.6, 1.8$  Hz, 2H);  $^{13}\text{C NMR}$  (100 MHz,  $\text{CDCl}_3$ )  $\delta$ : 150.8, 137.9, 130.5, 129.3, 128.0, 127.0, 126.0, 124.9, 122.9, 122.1, 121.2, 65.4.

### 8-chloro-2*H*-chromene (3g)

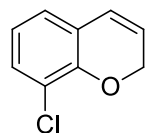

0.58 g, 70% yield;  $^1\text{H NMR}$  (400 MHz,  $\text{CDCl}_3$ )  $\delta$ : 7.13 (dd,  $J = 7.9, 1.7$  Hz, 1H), 6.82 (dd,  $J = 7.5, 1.7$  Hz, 1H), 6.78 – 6.73 (m, 1H), 6.37 (dt,  $J = 9.9, 1.9$  Hz, 1H),

5.77 (dt,  $J = 9.9, 3.5$  Hz, 1H), 4.92 (dd,  $J = 3.5, 1.9$  Hz, 2H).  $^{13}\text{C NMR}$  (100 MHz,  $\text{CDCl}_3$ )  $\delta$ : 149.8, 129.8, 125.1, 124.1, 123.7, 122.6, 121.6, 120.8, 66.4.

### 6-bromo-2H-chromene (3h)

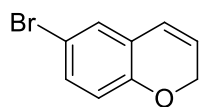

0.92 g, 87% yield;  $^1\text{H NMR}$  (400 MHz,  $\text{CDCl}_3$ )  $\delta$ : 7.16 (dd,  $J = 8.5, 2.4$  Hz, 1H), 7.05 (d,  $J = 2.4$  Hz, 1H), 6.63 (d,  $J = 8.5$  Hz, 1H), 6.33 (dt,  $J = 9.9, 1.9$  Hz, 1H), 5.79 (dt,  $J = 9.9, 3.5$  Hz, 1H), 4.81 (dd,  $J = 3.5, 1.9$  Hz, 2H).  $^{13}\text{C NMR}$  (100 MHz,  $\text{CDCl}_3$ )  $\delta$ : 153.0, 131.9, 129.1, 124.2, 123.6, 123.4, 117.5, 113.3, 65.7.

### 7-bromo-2H-chromene (3i)

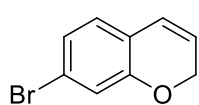

$^1\text{H NMR}$  ( $\text{CDCl}_3$ , 600 MHz)  $\delta$  7.17 (dd,  $J = 8.5, 2.4$  Hz, 1H), 7.06 (d,  $J = 2.4$  Hz, 1H), 6.65 (d,  $J = 8.5$  Hz, 1H), 6.34 – 6.34 (m, 1H), 5.80 – 5.78 (m, 1H), 4.82 (dd,  $J = 3.5, 1.9$  Hz, 2H).  $^{13}\text{C NMR}$  ( $\text{CDCl}_3$ , 151 MHz)  $\delta$  153.1, 131.6, 129.0, 124.1, 123.6, 123.2, 117.5, 113.2, 65.6.

### 6, 8-dimethyl-2H-chromene (3j)

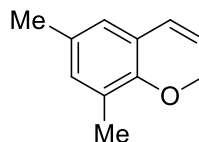

0.48 g, 59% yield;  $^1\text{H NMR}$  (400 MHz,  $\text{CDCl}_3$ )  $\delta$ : 6.69 (s, 1H), 6.53 (s, 1H), 6.28 (d,  $J = 9.8$  Hz, 1H), 5.65 (dt,  $J = 9.5, 3.5$  Hz, 1H), 4.69 (s, 2H), 2.12 (s, 3H), 2.05 (s, 3H).  $^{13}\text{C NMR}$  (100 MHz,  $\text{CDCl}_3$ )  $\delta$ : 150.4, 131.4, 129.9, 125.1, 124.8, 124.7, 121.9, 121.8, 65.5, 20.5, 15.5.

### 5, 8-dimethyl-2H-chromene (3k)

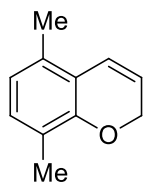

1.21 g, 76% yield;  $^1\text{H NMR}$  (400 MHz,  $\text{CDCl}_3$ )  $\delta$ : 6.90 (d,  $J = 7.6$  Hz, 1H), 6.68 – 6.62 (m, 2H), 5.84 (dt,  $J = 9.9, 3.7$  Hz, 1H), 4.78 (dd,  $J = 3.7, 1.7$  Hz, 2H), 2.29 (s, 3H), 2.18 (s, 3H).  $^{13}\text{C NMR}$  (100 MHz,  $\text{CDCl}_3$ )  $\delta$ : 152.4, 131.6, 130.1, 122.8, 122.4, 122.3, 121.4, 120.7, 64.8, 18.3, 15.5.

### 6-methyl-2H-thiochromene (3l)

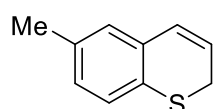

0.52 g, 71% yield;  $^1\text{H}$  NMR (400 MHz,  $\text{CDCl}_3$ )  $\delta$ : 7.10 (d,  $J = 7.9$  Hz, 1H), 6.91 (ddd,  $J = 7.8, 1.8, 0.5$  Hz, 1H), 6.87 (s, 1H), 6.44 (dt,  $J = 10.1, 1.6$  Hz, 1H), 5.94 (dt,  $J = 10.1, 5.1$  Hz, 1H), 3.42 (dd,  $J = 5.1, 1.6$  Hz, 2H), 2.28 (s, 3H).  $^{13}\text{C}$  NMR (100 MHz,  $\text{CDCl}_3$ )  $\delta$ : 135.37, 132.15, 129.40, 128.93, 128.78, 128.13, 127.05, 121.98, 25.32, 20.99.

## 5. The Characterization Data for products

### Methyl 4-methyl-3-(4,4,5,5-tetramethyl-1,3,2-dioxaborolan-2-yl)-3,4-dihydroquinoline-1(2H)-carboxylate (2a)

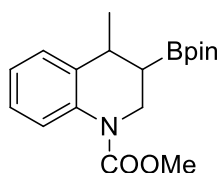

49.7 mg, 75% yield;  $^1\text{H}$  NMR ( $\text{CDCl}_3$ , 600 MHz)  $\delta$ : 7.74 (d,  $J = 8.2$  Hz, 1 H), 7.17-7.10 (m, 1 H), 7.07 (dd,  $J = 7.6, 1.7$  Hz, 1 H), 6.96 (td,  $J = 7.4, 1.2$  Hz, 1 H), 4.00 (ddd,  $J = 12.9, 5.7, 0.91$  Hz, 1 H), 3.79 (s, 3 H), 3.72-3.62 (m, 1 H), 3.06 (qd,  $J = 7.1, 3.9$  Hz, 1 H), 1.57 (ddd,  $J = 12.2, 5.7, 4.0$  Hz, 1 H), 1.23 (d,  $J = 1.4$  Hz, 12 H), 1.20 (d,  $J = 7.1$  Hz, 3 H).  $^{13}\text{C}$  NMR ( $\text{CDCl}_3$ , 100 MHz)  $\delta$ : 155.6, 136.8, 136.3, 127.2, 126.2, 123.6, 123.2, 83.6, 52.8, 43.3, 33.6, 25.1, 24.9, 24.8, 18.7. TOF-HRMS Calcd. for  $\text{C}_{18}\text{H}_{26}\text{BNO}_4$  [ $\text{M}+\text{H}^+$ ]: 332.2031, found 332.2028. 99.9% ee, dr > 99:1.  $[\alpha]_{\text{D}}^{30} = 2.8$  ( $c = 1.0$ ,  $\text{CH}_2\text{Cl}_2$ ). Enantiomeric excess of the corresponding hydroxyl compound obtained by oxidation with  $\text{NaBO}_3$  in  $\text{THF}/\text{H}_2\text{O}$  (1:1); HPLC condition: Lux 5u Amylose-1 (250  $\times$  4.60 mm), ipa : hex = 10:90, 1.0 mL/min, 254 nm;  $t_{\text{A}} = 19.5$  min (minor),  $t_{\text{B}} = 20.6$  min (major).

### Methyl 4,6-dimethyl-3-(4,4,5,5-tetramethyl-1,3,2-dioxaborolan-2-yl)-3,4-dihydroquinoline-1(2H)-carboxylate (2b)

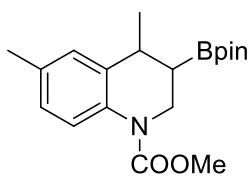

47.0 mg, 68% yield;  $^1\text{H NMR}$  ( $\text{CDCl}_3$ , 600 MHz)  $\delta$ : 7.61 (d,  $J = 8.5$  Hz, 1 H), 6.94 (dd,  $J = 8.4, 1.8$  Hz, 1 H), 6.88 (d,  $J = 1.9$  Hz, 1 H), 3.99 (ddd,  $J = 12.9, 5.6, 0.8$  Hz, 1 H), 3.78 (s, 3 H), 3.63 (d,  $J = 12.7$  Hz, 1 H), 3.02

(qd,  $J = 7.1, 4.0$  Hz, 1 H), 2.26 (s, 3 H), 1.59-1.52 (2 H, m), 1.23 (s, 12 H), 1.18 (d,  $J = 7.2$  Hz, 3 H).  $^{13}\text{C NMR}$  ( $\text{CDCl}_3$ , 100 MHz)  $\delta$ : 155.6, 136.1, 134.3, 132.6, 127.8, 126.8, 123.5, 83.6, 54.8, 52.8, 43.1, 33.5, 25.1, 25.0, 24.8, 20.8, 18.9. TOF-HRMS Calcd. for  $\text{C}_{19}\text{H}_{28}\text{BNO}_4$  [ $\text{M}+\text{H}^+$ ]: 346.2188, found 346.2190. 99.9% ee, dr > 99:1.  $[\alpha]_{\text{D}}^{30} = 4.0$  ( $c = 1.0$ ,  $\text{CH}_2\text{Cl}_2$ ). Enantiomeric excess of the corresponding hydroxyl compound obtained by oxidation with  $\text{NaBO}_3$  in  $\text{THF}/\text{H}_2\text{O}$  (1:1); HPLC condition: Lux 5u Amylose-1 (250  $\times$  4.60 mm), ipa : hex = 10:90, 1.0 mL/min, 254 nm;  $t_{\text{A}} = 10.1$  min (major),  $t_{\text{B}} = 11.4$  min (minor).

**Methyl 4,7-dimethyl-3-(4,4,5,5-tetramethyl-1,3,2-dioxaborolan-2-yl)-3,4-dihydroquinoline-1(2H)-carboxylate (2c)**

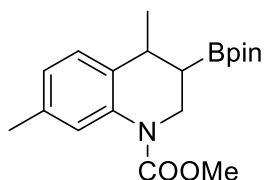

51.1 mg, 74% yield;  $^1\text{H NMR}$  ( $\text{CDCl}_3$ , 400 MHz)  $\delta$ : 7.60 (s, 1 H), 6.96 (d,  $J = 7.7$  Hz, 1 H), 6.81-6.74 (m, 1 H), 4.00 (ddd,  $J = 13.0, 5.6, 0.8$  Hz, 1 H), 3.79 (s, 3 H), 3.64 (t,  $J = 12.7$  Hz, 1 H), 3.04 (qd,  $J = 7.1, 4.1$  Hz, 1

H), 2.29 (s, 3 H), 1.56 (dd,  $J = 11.9, 5.4$  Hz, 1 H), 1.23 (d,  $J = 2.21$  Hz, 12 H), 1.17 (d,  $J = 7.1$  Hz, 3 H).  $^{13}\text{C NMR}$  ( $\text{CDCl}_3$ , 100 MHz)  $\delta$ : 155.6, 136.7, 135.7, 133.3, 127.2, 124.0, 123.9, 83.6, 52.8, 43.1, 33.1, 25.0, 24.8, 21.5, 19.0. TOF-HRMS Calcd. for  $\text{C}_{19}\text{H}_{28}\text{BNO}_4$  [ $\text{M}+\text{H}^+$ ]: 346.2188, found 346.2190. 99% ee, dr > 99:1.  $[\alpha]_{\text{D}}^{30} = 3.6$  ( $c = 1.0$ ,  $\text{CH}_2\text{Cl}_2$ ). Enantiomeric excess of the corresponding hydroxyl compound obtained by oxidation with  $\text{NaBO}_3$  in  $\text{THF}/\text{H}_2\text{O}$  (1:1); SFC condition: Lux 5u Cellulose-1 (250  $\times$  4.60 mm), MeOH :  $\text{CO}_2 = 10:90$ , 3.0 mL/min, 254 nm;  $t_{\text{A}} = 3.4$  min (minor),  $t_{\text{B}} = 3.7$  min (major).

**Methyl 6-methoxy-4-methyl-3-(4,4,5,5-tetramethyl-1,3,2-dioxaborolan-2-yl)-3,4-dihydroquinoline-1(2H)-carboxylate (2d)**

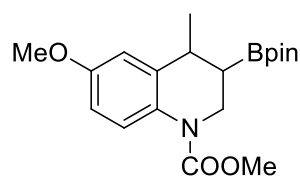

56.4 mg, 78% yield;  $^1\text{H NMR}$  ( $\text{CDCl}_3$ , 400 MHz)  $\delta$ : 7.63 (d,  $J = 7.7$  Hz, 1 H), 6.70 (1 H, dd,  $J = 9.0, 3.0$  Hz), 6.63 (1 H, d,  $J = 3.0$  Hz), 3.96 (1 H, ddd,  $J = 12.9, 5.8, 0.7$  Hz), 3.76 (6 H, d,  $J = 7.6$  Hz), 3.70-3.62 (1 H, m), 3.02 (1 H, qd,  $J = 7.1, 4.0$  Hz), 1.56 (ddd,  $J = 12.1, 5.8, 4.0$  Hz, 1 H), 1.23 (s, 12 H), 1.19 (d,  $J = 7.1$  Hz, 3 H).  $^{13}\text{C NMR}$  ( $\text{CDCl}_3$ , 100 MHz)  $\delta$ : 155.6, 130.1, 124.7, 112.4, 111.4, 83.6, 55.5, 52.8, 43.2, 33.9, 25.0, 24.8, 18.6. TOF-HRMS Calcd. for  $\text{C}_{19}\text{H}_{28}\text{BNO}_5$  [ $\text{M}+\text{H}^+$ ]: 362.2137, found 362.2140. 99.9% ee, dr > 99:1.  $[\alpha]_{\text{D}}^{30} = 4.3$  ( $c = 1.0$ ,  $\text{CH}_2\text{Cl}_2$ ). Enantiomeric excess of the corresponding hydroxyl compound obtained by oxidation with  $\text{NaBO}_3$  in THF/ $\text{H}_2\text{O}$  (1:1); SFC condition: Lux 5u Cellulose-1 (250  $\times$  4.60 mm), MeOH :  $\text{CO}_2 = 10:90$ , 3.0 mL/min, 254 nm;  $t_{\text{A}} = 6.7$  min (minor),  $t_{\text{B}} = 8.3$  min (major).

**Methyl 6-bromo-4-methyl-3-(4,4,5,5-tetramethyl-1,3,2-dioxaborolan-2-yl)-3,4-dihydroquinoline-1(2H)-carboxylate (2e)**

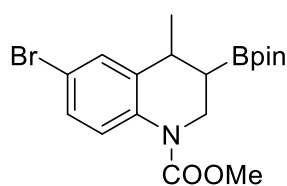

57.4 mg, 70% yield;  $^1\text{H NMR}$  ( $\text{CDCl}_3$ , 400 MHz)  $\delta$ : 7.68 (d,  $J = 8.7$  Hz, 1 H), 7.25-7.21 (m, 1 H), 7.19 (d,  $J = 2.3$  Hz, 1 H), 3.97 (ddd,  $J = 13.0, 5.7, 0.8$  Hz, 1 H), 3.79 (s, 3 H), 3.69-3.61 (m, 1 H), 3.00 (1 H, td,  $J = 7.1, 4.1$  Hz), 1.54 (dq,  $J = 9.6, 3.9, 2.8$  Hz, 1 H), 1.22 (s, 12 H), 1.18 (s, 3 H).  $^{13}\text{C NMR}$  ( $\text{CDCl}_3$ , 150 MHz)  $\delta$ : 155.4, 138.3, 136.0, 129.8, 129.1, 125.1, 115.9, 100.0, 83.7, 52.9, 43.4, 33.5, 24.9, 24.8, 18.5. TOF-HRMS Calcd. for  $\text{C}_{18}\text{H}_{25}\text{BBrNO}_4$  [ $\text{M}+\text{H}^+$ ]: 410.1136, found 410.1139. 88% ee, dr > 99:1.  $[\alpha]_{\text{D}}^{30} = 9.8$  ( $c = 1.0$ ,  $\text{CH}_2\text{Cl}_2$ ). Enantiomeric excess of the corresponding hydroxyl compound obtained by oxidation with  $\text{NaBO}_3$  in THF/ $\text{H}_2\text{O}$  (1:1); HPLC condition: Lux 5u

Amylose-1 (250 × 4.60 mm), ipa : hex = 10:90, 1.0 mL/min, 254 nm;  $t_A$  = 11.1 min (major),  $t_B$  = 13.9 min (minor).

**Methyl 7-bromo-4-methyl-3-(4,4,5,5-tetramethyl-1,3,2-dioxaborolan-2-yl)-3,4-dihydroquinoline-1(2H)-carboxylate (2f)**

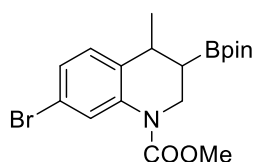

57.4 mg, 70% yield;  $^1\text{H NMR}$  ( $\text{CDCl}_3$ , 600 MHz)  $\delta$ : 8.02 (s, 1 H), 7.08 (dd,  $J$  = 8.1, 2.0 Hz, 1 H), 6.93 (d,  $J$  = 8.1 Hz, 1 H), 3.98 (dd,  $J$  = 13.0, 5.6 Hz, 1 H), 3.81 (s, 3 H), 3.64 (t,  $J$  = 12.6 Hz, 1 H), 3.02 (m, 1 H), 1.56-1.50 (m, 1 H), 1.23 (d,  $J$  = 2.6 Hz, 12 H), 1.17 (d,  $J$  = 7.1 Hz, 3 H).  $^{13}\text{C NMR}$  ( $\text{CDCl}_3$ , 150 MHz)  $\delta$ : 155.3, 138.1, 134.8, 128.5, 126.1, 125.9, 119.4, 83.7, 53.0, 43.2, 33.2, 24.9, 24.8, 18.6. TOF-HRMS Calcd. for  $\text{C}_{18}\text{H}_{25}\text{BBrNO}_4$  [ $\text{M}+\text{H}^+$ ]: 410.1136, found 410.1138. 96% ee, dr > 99:1.  $[\alpha]_D^{30}$  = -10.6 ( $c$  = 1.0,  $\text{CH}_2\text{Cl}_2$ ). Enantiomeric excess of the corresponding hydroxyl compound obtained by oxidation with  $\text{NaBO}_3$  in  $\text{THF}/\text{H}_2\text{O}$  (1:1); HPLC condition: Lux 5u Amylose-1 (250 × 4.60 mm), ipa : hex = 10:90, 1.0 mL/min, 254 nm;  $t_A$  = 4.9 min (minor),  $t_B$  = 5.6 min (major).

**Isopropyl 4-methyl-3-(4,4,5,5-tetramethyl-1,3,2-dioxaborolan-2-yl)-3,4-dihydroquinoline-1(2H)-carboxylate (2g)**

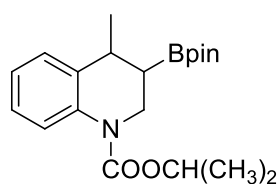

51.0 mg, 71% yield;  $^1\text{H NMR}$  ( $\text{CDCl}_3$ , 400 MHz)  $\delta$ : 7.73 (d,  $J$  = 8.2 Hz, 1 H), 7.16-7.03 (m, 2 H), 6.95 (td,  $J$  = 7.4, 1.2 Hz, 1 H), 5.04 (hept,  $J$  = 6.2 Hz, 1 H), 4.00 (ddd,  $J$  = 12.9, 5.7, 0.9 Hz, 1 H), 3.63 (dd,  $J$  = 12.8, 12.3 Hz, 1 H), 3.05 (qd,  $J$  = 7.1, 4.0 Hz, 1 H), 1.56 (qd,  $J$  = 5.9, 4.0 Hz, 1 H), 1.30 (dd,  $J$  = 6.2, 3.1 Hz, 6 H), 1.23-1.22 (12 H, m), 1.20 (d,  $J$  = 7.1 Hz, 3 H).  $^{13}\text{C NMR}$  ( $\text{CDCl}_3$ , 100 MHz)  $\delta$ : 154.8, 137.1, 136.3, 127.1, 126.0, 123.8, 122.9, 83.6, 69.3, 43.1, 33.6, 25.0, 24.8, 22.2, 18.7. TOF-HRMS Calcd. for  $\text{C}_{20}\text{H}_{30}\text{BNO}_4$  [ $\text{M}+\text{H}^+$ ]: 360.2344, found 360.2341. 98% ee, dr > 99:1.  $[\alpha]_D^{30}$  = 3.9 ( $c$  = 1.0,



CH<sub>2</sub>Cl<sub>2</sub>). Enantiomeric excess of the corresponding hydroxyl compound obtained by oxidation with NaBO<sub>3</sub> in THF/H<sub>2</sub>O (1:1); SFC condition: Lux 5u Cellulose-1 (250 × 4.60 mm), MeOH : CO<sub>2</sub> = 10:90, 3.0 mL/min, 254 nm; t<sub>A</sub> = 2.8 min (minor), t<sub>B</sub> = 3.0 min (major).

**Isobutyl 4-methyl-3-(4,4,5,5-tetramethyl-1,3,2-dioxaborolan-2-yl)-3,4-dihydroquinoline-1(2H)-carboxylate (2h)**

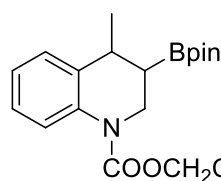

56.7 mg, 76% yield; <sup>1</sup>H NMR (CDCl<sub>3</sub>, 400 MHz) δ: 7.73 (d, *J* = 8.3 Hz, 1 H), 7.17-7.03 (2 H, m), 6.96 (td, *J* 7.4, 1.2 Hz, 1 H), 4.04 (ddd, *J* = 12.9, 5.6, 0.9 Hz, 1 H), 4.00-3.95 (2 H, m), 3.66 (dd, *J* = 12.9, 12.1 Hz, 1 H), 3.06 (qd, *J* = 7.1, 4.1 Hz, 1 H), 2.00 (hept, *J* = 6.7 Hz, 1 H), 1.58 (ddd, *J* = 12.0, 5.5, 4.1 Hz, 1 H), 1.22 (s, 12 H), 1.20 (s, 3 H), 0.96 (d, *J* = 6.7 Hz, 6 H). <sup>13</sup>C NMR (CDCl<sub>3</sub>, 100 MHz) δ: 155.3, 137.0, 136.2, 127.2, 126.0, 123.9, 123.1, 100.0, 83.6, 43.2, 33.5, 28.1, 25.0, 24.8, 19.3, 18.9. TOF-HRMS Calcd. for C<sub>21</sub>H<sub>32</sub>BNO<sub>4</sub> [M+H<sup>+</sup>]: 374.1498, found 374.2501. 98% ee, dr > 99:1.

[α]<sub>D</sub><sup>30</sup> = -3.0 (c = 1.0, CH<sub>2</sub>Cl<sub>2</sub>). Enantiomeric excess of the corresponding hydroxyl compound obtained by oxidation with NaBO<sub>3</sub> in THF/H<sub>2</sub>O (1:1); SFC condition: Lux 5u Cellulose-1 (250 × 4.60 mm), MeOH : CO<sub>2</sub> = 10:90, 3.0 mL/min, 254 nm; t<sub>A</sub> = 3.0 min (minor), t<sub>B</sub> = 3.3 min (major).

**Phenyl 4-methyl-3-(4,4,5,5-tetramethyl-1,3,2-dioxaborolan-2-yl)-3,4-dihydroquinoline-1(2H)-carboxylate (2i)**

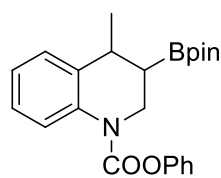

56.6 mg, 72% yield; <sup>1</sup>H NMR (CDCl<sub>3</sub>, 400 MHz) δ: 7.87 (d, *J* = 8.1 Hz, 1 H), 7.40-7.35 (m, 2 H), 7.24-7.16 (m, 4 H), 7.16-7.10 (m, 2 H), 7.01 (td, *J* = 7.4, 1.2 Hz, 1 H), 4.19 (dd, *J* = 13.0, 5.5 Hz, 1 H), 3.93-3.80 (m, 1 H), 3.14 (qd, *J* = 7.2, 4.1 Hz, 1 H), 1.68 (ddd, *J* = 12.1, 5.7, 4.0 Hz, 1 H), 1.28 (d, *J* = 7.1 Hz, 3 H), 1.24 (s, 12 H). <sup>13</sup>C NMR (CDCl<sub>3</sub>, 100 MHz) δ: 153.5, 151.4, 136.5, 129.4, 127.3, 126.4, 125.5, 123.7, 121.9, 100.0,

83.7, 83.6, 43.9, 33.6, 25.1, 25.0, 24.8, 18.8. TOF-HRMS Calcd. for  $C_{23}H_{28}BNO_4$   $[M+H^+]$ : 394.2188, found 394.2190. 99.9% ee, dr > 99:1.  $[\alpha]_D^{30} = 10.4$  (c = 1.0,  $CH_2Cl_2$ ). Enantiomeric excess of the corresponding hydroxyl compound obtained by oxidation with  $NaBO_3$  in THF/ $H_2O$  (1:1); SFC condition: Lux 5u Cellulose-1 (250 × 4.60 mm), MeOH :  $CO_2 = 10:90$ , 3.0 mL/min, 254 nm;  $t_A = 9.4$  min (major),  $t_B = 10.2$  min (minor).

**Benzyl 4-methyl-3-(4,4,5,5-tetramethyl-1,3,2-dioxaborolan-2-yl)-3,4-dihydroquinoline-1(2H)-carboxylate (2j)**

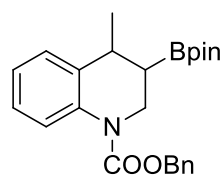

57.0 mg, 70% yield;  $^1H$  NMR ( $CDCl_3$ , 600 MHz)  $\delta$ : 7.75 (d,  $J = 5.5$  Hz, 1 H), 7.42-7.39 (m, 2 H), 7.35 (td,  $J = 6.6, 6.1, 1.5$  Hz, 2 H), 7.32-7.29 (m, 1 H), 7.12 (ddd,  $J = 8.5, 7.5, 1.6$  Hz, 1 H), 7.08 (dd,  $J = 7.6, 1.5$  Hz, 1 H), 6.97 (td,  $J = 7.4, 1.1$  Hz, 1 H), 5.30-5.20 (m, 2 H), 4.10-4.03 (m, 1 H), 3.75-3.67 (m, 1 H), 3.07 (qd,  $J = 7.1, 4.1$  Hz, 1 H), 1.61-1.56 (m, 1 H), 1.22 (d,  $J = 2.2$  Hz, 12 H), 1.20 (s, 3 H).  $^{13}C$  NMR ( $CDCl_3$ , 150 MHz)  $\delta$ : 155.0, 136.8, 136.8, 136.6, 128.6, 128.0, 127.9, 127.2, 126.2, 83.6, 67.3, 43.5, 33.5, 29.8, 25.0, 24.8, 18.8. TOF-HRMS Calcd. for  $C_{24}H_{30}BNO_4$   $[M+H^+]$ : 408.2345, found 408.2342. 99.9% ee, dr > 99:1.  $[\alpha]_D^{30} = 4.6$  (c = 1.0,  $CH_2Cl_2$ ). Enantiomeric excess of the corresponding hydroxyl compound obtained by oxidation with  $NaBO_3$  in THF/ $H_2O$  (1:1); SFC condition: Lux 5u Cellulose-1 (250 × 4.60 mm), MeOH :  $CO_2 = 10:90$ , 3.0 mL/min, 254 nm;  $t_A = 11.3$  min (minor),  $t_B = 13.9$  min (major).

**1-(4-methyl-3-(4,4,5,5-tetramethyl-1,3,2-dioxaborolan-2-yl)-3,4-dihydroquinolin-1(2H)-yl)ethanone (2k)**

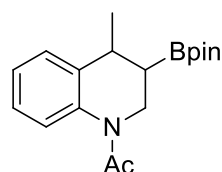

29.4 mg, 78% yield;  $^1H$  NMR ( $CDCl_3$ , 600 MHz)  $\delta$ : 7.27-7.22 (1 H, m), 7.17-7.12 (m, 2 H), 7.07-7.05 (m, 1 H), 3.89-3.84 (m, 2 H), 3.04 (qd,  $J = 7.2, 4.0$

Hz, 1 H), 2.24 (s, 3 H), 1.57 (s, 3 H), 1.21 (s, 1 H), 1.19 (d,  $J = 3.6$  Hz, 12H).  $^{13}\text{C}$  NMR ( $\text{CDCl}_3$ , 150 MHz)  $\delta$ : 170.6, 126.7, 126.1, 124.9, 124.7, 83.6, 34.1, 29.4, 24.9, 24.8, 23.7. TOF-HRMS Calcd. for  $\text{C}_{18}\text{H}_{26}\text{BNO}_4$  [ $\text{M}+\text{H}^+$ ]: 316.2082, found 316.2080. 99% ee, dr > 99:1.  $[\alpha]_{\text{D}}^{30} = 10.3$  (c= 1.0,  $\text{CH}_2\text{Cl}_2$ ). Enantiomeric excess of the corresponding hydroxyl compound obtained by oxidation with  $\text{NaBO}_3$  in THF/ $\text{H}_2\text{O}$  (1:1); SFC condition: Lux 5u Cellulose-1 (250  $\times$  4.60 mm), MeOH :  $\text{CO}_2 = 10:90$ , 3.0 mL/min, 254 nm;  $t_{\text{A}} = 5.08$  min (minor),  $t_{\text{B}} = 5.37$  min (major).

**methyl 4-ethyl-3-(4,4,5,5-tetramethyl-1,3,2-dioxaborolan-2-yl)-3,4-dihydroquinoline-1(2H)-carboxylate (2l)**

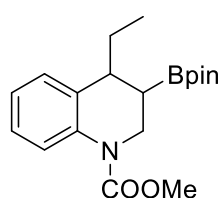

Colorless oil, 21.8 mg, 54%.  $^1\text{H}$  NMR ( $\text{CDCl}_3$ , 400 MHz)  $\delta$  7.72 (d,  $J = 8.1$  Hz, 1H), 7.19 – 7.14 (m, 1H), 7.03 – 7.00 (m, 1H), 6.96 (t,  $J = 7.4$  Hz, 1H), 3.84 – 3.76 (m, 5H), 2.77 – 2.72 (m, 1H), 1.58 – 1.47 (m, 3H), 1.25 (s, 12H), 0.91 (t,  $J = 7.3$  Hz, 3H).  $^{13}\text{C}$  NMR ( $\text{CDCl}_3$ , 101 MHz)  $\delta$  155.7, 136.5, 135.7, 127.8, 126.2, 123.9, 122.6, 83.5, 52.6, 44.1, 41.6, 24.8, 24.6, 23.9, 12.8. TOF-HRMS Calcd. for  $\text{C}_{19}\text{H}_{29}\text{BNO}_4$  [ $\text{M}+\text{H}^+$ ]: 346.2188, found 346.2190. 80% ee, dr > 99:1.  $[\alpha]_{\text{D}}^{30} = 31.5$  (c= 1.0,  $\text{CH}_2\text{Cl}_2$ ). Enantiomeric excess of the corresponding hydroxyl compound obtained by oxidation with  $\text{NaBO}_3$  in THF/ $\text{H}_2\text{O}$  (1:1); HPLC condition: Lux 5u Cellulose-1 (250  $\times$  4.60 mm), ipa : hex = 5:95, 1.0 mL/min, 254 nm;  $t_{\text{A}} = 21.5$  min (major),  $t_{\text{B}} = 23.4$  min (minor).

**methyl 4-benzyl-3-hydroxy-3,4-dihydroquinoline-1(2H)-carboxylate (2m)**

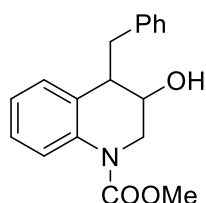

Colorless oil.  $^1\text{H}$  NMR ( $\text{CDCl}_3$ , 600 MHz)  $\delta$  7.67 (d,  $J = 8.2$  Hz, 1H), 7.31 – 7.30 (m, 2H), 7.25 – 7.24 (m, 4H), 7.21 (d,  $J = 7.6$  Hz, 1H), 7.10 (td,  $J = 7.5$ , 1.2 Hz, 1H), 4.08 (s, 1H), 3.79 – 3.74 (m, 4H), 3.23 – 3.19 (m, 1H), 3.07 – 3.02 (m, 2H), 1.54 – 1.47 (m, 1H).  $^{13}\text{C}$  NMR ( $\text{CDCl}_3$ , 101 MHz)  $\delta$  155.6, 139.5, 137.2, 130.1, 129.2, 128.5, 127.3, 126.9, 126.3, 124.4, 123.9, 66.4, 53.1, 51.4, 44.0, 34.2. TOF-HRMS Calcd. for

C<sub>18</sub>H<sub>20</sub>NO<sub>3</sub> [M+H<sup>+</sup>]: 298.1438, found 298.1439. 89% ee, dr > 99:1. [α]<sub>D</sub><sup>30</sup> = -41.1 (c = 1.0, CH<sub>2</sub>Cl<sub>2</sub>).

HPLC condition: Lux 5u Amylose-2 (250 × 4.60 mm), CO<sub>2</sub> : MeOH = 94:6, 3.0 mL/min, 210 nm;

t<sub>A</sub> = 9.7 min (minor), t<sub>B</sub> = 10.2 min (major).

#### 4,4,5,5-tetramethyl-2-(4-methylchroman-3-yl)-1,3,2-dioxaborolane (4a)

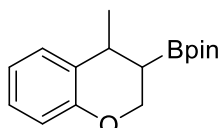

60 mg, 73 % yield; <sup>1</sup>H NMR (CDCl<sub>3</sub>, 600 MHz) δ: 7.07 – 7.03 (m, 2H), 6.81

(td, *J* = 7.5, 0.8 Hz, 1H), 6.77 (d, *J* = 8.2 Hz, 1H), 4.34 – 4.30 (ddd, *J* = 11.8,

3.7, 0.9 Hz, 1H), 4.18 – 4.13 (m, 1H), 3.10 – 3.05 (m, 1H), 1.78 (dt, *J* = 12.5,

4.2 Hz, 1H), 1.27 (dd, *J* = 6.9 Hz, 3H), 1.26 (s, 12H). <sup>13</sup>C NMR (CDCl<sub>3</sub>, 150 MHz) δ: 152.97, 128.38,

127.97, 126.28, 118.90, 115.92, 82.69, 62.40, 29.02, 24.18, 23.89, 21.00. TOF-HRMS Calcd. for

C<sub>16</sub>H<sub>24</sub>BO<sub>3</sub> [M+H<sup>+</sup>]: 275.1816, found 275.1810. 99% ee, dr > 99:1; [α]<sub>D</sub><sup>25</sup> = -49.9 (c = 1, CH<sub>2</sub>Cl<sub>2</sub>);

Enantiomeric excess of the corresponding hydroxyl compound obtained by oxidation with NaBO<sub>3</sub>

in THF/H<sub>2</sub>O (1:1); SFC condition: Lux 5u Cellulose-4 (250 × 4.60 mm), MeOH : CO<sub>2</sub> = 10:90, 3.0

mL/min, 230 nm; t<sub>A</sub> = 2.9 min (major), t<sub>B</sub> = 3.3 min (minor).

#### 2-(4,8-dimethylchroman-3-yl)-4,4,5,5-tetramethyl-1,3,2-dioxaborolane (4b)

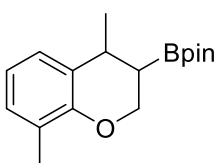

54 mg, 62 % yield; <sup>1</sup>H NMR (CDCl<sub>3</sub>, 400 MHz) δ: 6.91 (dd, *J* = 11.5, 7.5 Hz,

2H), 6.71 (t, *J* = 7.4 Hz, 1H), 4.37 (ddd, *J* = 11.4, 3.7, 1.2 Hz, 1H), 4.15 (dd,

*J* = 12.4, 11.6 Hz, 1H), 3.11 – 3.02 (m, 1 H), 2.16 (s, 3H), 1.76 (dt, *J* = 12.5,

4.1 Hz, 1H), 1.26 (d, *J* = 7.1 Hz, 3H), 1.26 (s, 12H). <sup>13</sup>C NMR (CDCl<sub>3</sub>, 100 MHz) δ: 151.95, 128.23,

128.17, 126.93, 125.64, 118.96, 83.40, 63.29, 30.01, 25.09, 24.77, 22.05, 16.24. TOF-HRMS Calcd.

for C<sub>17</sub>H<sub>26</sub>BO<sub>3</sub> [M+H<sup>+</sup>]: 289.1973, found 289.1972. 99.9% ee, dr > 99:1; [α]<sub>D</sub><sup>25</sup> = -42.4 (c = 1,

CH<sub>2</sub>Cl<sub>2</sub>); Enantiomeric excess of the corresponding hydroxyl compound obtained by oxidation with

NaBO<sub>3</sub> in THF/H<sub>2</sub>O (1:1); SFC condition: Lux 5u Cellulose-4 (250 × 4.60 mm), MeOH : CO<sub>2</sub> =

10:90, 3.0 mL/min, 230 nm;  $t_A = 3.1$  min (major),  $t_B = 3.4$  min (minor).

#### 2-(8-isopropyl-4-methylchroman-3-yl)-4,4,5,5-tetramethyl-1,3,2-dioxaborolane (4c)

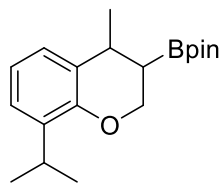

48 mg, 64 % yield;  $^1\text{H NMR}$  ( $\text{CDCl}_3$ , 400 MHz)  $\delta$ : 7.01 (dd,  $J = 7.5, 1.7$  Hz, 1H), 6.90 (dd,  $J = 7.7, 1.5$  Hz, 1H), 6.79 (t,  $J = 7.5$  Hz, 1H), 4.38 (ddd,  $J = 11.4, 3.7, 1.3$  Hz, 1H), 4.14 (dd,  $J = 12.4, 11.4$  Hz, 1H), 3.25 (dt,  $J = 13.8, 6.9$  Hz, 1H), 3.12 – 3.04 (m, 1H), 1.77 (dt,  $J = 12.4, 4.0$  Hz 1H), 1.28 (d,  $J = 7.1$  Hz, 3H), 1.26 (s, 12H), 1.19 (dd,  $J = 8.1, 6.9$  Hz, 6H).  $^{13}\text{C NMR}$  ( $\text{CDCl}_3$ , 100 MHz)  $\delta$ : 151.56, 136.49, 128.43, 126.98, 123.72, 119.40, 83.64, 77.53, 77.21, 76.89, 63.41, 30.37, 26.85, 25.20, 24.93, 22.86, 22.21. TOF-HRMS Calcd. for  $\text{C}_{19}\text{H}_{29}\text{BO}_3$  [ $\text{M}+\text{H}^+$ ]: 316.2106, found 316.2100. 99.9% ee,  $\text{dr} > 99:1$ ;  $[\alpha]_{\text{D}}^{25} = -29$  ( $c = 0.3, \text{CH}_2\text{Cl}_2$ ); Enantiomeric excess of the corresponding hydroxyl compound obtained by oxidation with  $\text{NaBO}_3$  in  $\text{THF}/\text{H}_2\text{O}$  (1:1); SFC condition: Lux 5u Cellulose-1 (250  $\times$  4.60 mm), MeOH:  $\text{CO}_2 = 10:90$ , 3 mL/min, 230 nm;  $t_A = 2.6$  min (major),  $t_B = 2.8$  min (minor).

#### 2-(8-(tert-butyl)-4-methylchroman-3-yl)-4,4,5,5-tetramethyl-1,3,2-dioxaborolane (4d)

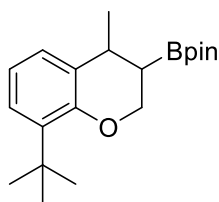

48 mg, 72 % yield;  $^1\text{H NMR}$  ( $\text{CDCl}_3$ , 400 MHz)  $\delta$ : 7.09 (dd,  $J = 7.7, 1.7$  Hz, 1H), 6.94 (ddd,  $J = 7.5, 1.7, 0.5$  Hz, 1H), 6.76 (t,  $J = 7.6$  Hz, 1H), 4.41 (ddd,  $J = 11.3, 3.7, 1.4$  Hz, 1H), 4.14 (dd,  $J = 12.4, 11.3$  Hz, 1H), 3.10 (m, 1H), 1.81 – 1.74 (m, 1H), 1.36 (s, 9H), 1.30 (d,  $J = 6.9$  Hz, 3H), 1.27 (s, 12 H).  $^{13}\text{C NMR}$  ( $\text{CDCl}_3$ , 100 MHz)  $\delta$ : 153.33, 137.78, 129.02, 127.67, 124.29, 118.91, 83.33, 62.62, 34.96, 30.43, 29.78, 25.08, 24.83, 22.24. TOF-HRMS Calcd. for  $\text{C}_{20}\text{H}_{32}\text{BO}_3$  [ $\text{M}+\text{H}^+$ ]: 331.2443, found 331.2444. 99.9% ee,  $\text{dr} > 99:1$ ;  $[\alpha]_{\text{D}}^{25} = -52.5$  ( $c = 0.5, \text{CH}_2\text{Cl}_2$ ); Enantiomeric excess of the corresponding hydroxyl compound obtained by oxidation with  $\text{NaBO}_3$  in  $\text{THF}/\text{H}_2\text{O}$  (1:1); HPLC condition: Lux 5u Amylose-1 (250  $\times$  4.60 mm), ipa : hex = 3: 97, 1 mL/min, 254 nm;  $t_A = 7.8$  min (minor),  $t_B = 8.2$  min (major).

#### 2-(8-methoxy-4-methylchroman-3-yl)-4,4,5,5-tetramethyl-1,3,2-dioxaborolane (4e)

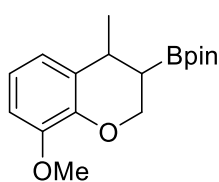

59 mg, 65 % yield;  $^1\text{H}$  NMR ( $\text{CDCl}_3$ , 400 MHz)  $\delta$ : 6.76 (dd,  $J = 8.2, 7.3$  Hz, 1H), 6.70 – 6.65 (m, , 2H), 4.45 (ddd,  $J = 11.5, 3.8, 1.3$  Hz, 1H), 4.19 (dd,  $J = 12.7, 11.5$  Hz, 1H), 3.85 (s, 3H), 3.11 – 3.03 (m, 1H), 1.79 (dt,  $J = 12.7, 4.1$  Hz,

1H), 1.26 (d,  $J = 7.1$ Hz, 3H), 1.26(s, 12H).  $^{13}\text{C}$  NMR ( $\text{CDCl}_3$ , 100 MHz)  $\delta$ : 148.36, 143.51, 129.53, 121.39, 119.11, 108.75, 83.62, 63.65, 55.86, 29.78, 25.06, 24.83, 21.87. TOF-HRMS Calcd. for  $\text{C}_{17}\text{H}_{26}\text{BO}_4$  [ $\text{M}+\text{H}^+$ ]: 305.1922, found 305.1926. 99% ee, dr > 99:1;  $[\alpha]_{\text{D}}^{25} = -25.0$  (c = 0.5,  $\text{CH}_2\text{Cl}_2$ );

Enantiomeric excess of the corresponding hydroxyl compound obtained by oxidation with  $\text{NaBO}_3$  in THF/ $\text{H}_2\text{O}$  (1:1); SFC condition: Lux 5u Cellulose-1 (250  $\times$  4.60 mm), MeOH:  $\text{CO}_2 = 10:90$ , 3 mL/min, 210 nm;  $t_{\text{A}} = 5.3$  min (minor),  $t_{\text{B}} = 5.9$  min (major).

#### 4,4,5,5-tetramethyl-2-(4-methyl-8-phenylchroman-3-yl)-1,3,2-dioxaborolane (4f)

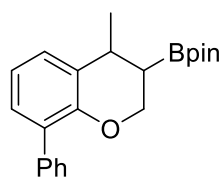

85 mg, 81 % yield;  $^1\text{H}$  NMR ( $\text{CDCl}_3$ , 400 MHz)  $\delta$ : 7.52 (dt,  $J = 8.1, 1.7$  Hz, 2H), 7.40 – 7.35 (m, 2H), 7.29 (dt,  $J = 4.4, 1.7$  Hz, 1H), 7.11 (dd,  $J = 7.5, 1.7$  Hz, 1H), 7.05 (dd,  $J = 7.7, 1.9$  Hz, 1H), 6.88 (t,  $J = 7.5$  Hz, 1H), 4.34 (ddd,  $J = 11.5, 3.7, 1.3$  Hz, 1H), 4.14 (dd,  $J = 12.3, 11.6$  Hz, 1H), 3.19 – 3.10 (m, 1H), 1.84 – 1.77 (m, 1H), 1.32 (d,  $J = 7.1$  Hz, 3H), 1.26 (s, 12H).  $^{13}\text{C}$  NMR ( $\text{CDCl}_3$ , 100 MHz)  $\delta$ : 148.36, 129.52, 121.39, 119.11, 108.75, 83.62, 77.29, 63.65, 55.86, 29.78, 25.06, 24.83, 21.87. TOF-HRMS Calcd. for  $\text{C}_{22}\text{H}_{28}\text{BO}_3$  [ $\text{M}+\text{H}^+$ ]: 351.2130, found 351.2129. 99% ee, dr > 99:1;  $[\alpha]_{\text{D}}^{25} = -48.6$  (c = 1,  $\text{CH}_2\text{Cl}_2$ );

Enantiomeric excess of the corresponding hydroxyl compound obtained by oxidation with  $\text{NaBO}_3$  in THF/ $\text{H}_2\text{O}$  (1:1); SFC condition: Lux 5u Cellulose-1 (250  $\times$  4.60 mm), MeOH:  $\text{CO}_2 = 10:90$ , 3 mL/min, 230 nm;  $t_{\text{A}} = 5.9$  min (minor),  $t_{\text{B}} = 7.4$  min (major).

### 2-(8-chloro-4-methylchroman-3-yl)-4,4,5,5-tetramethyl-1,3,2-dioxaborolane (4g)

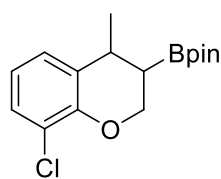

55 mg, 59% yield;  $^1\text{H NMR}$  ( $\text{CDCl}_3$ , 400 MHz)  $\delta$ : 7.14 (dd,  $J = 7.9, 1.4$  Hz, 1H), 6.96 – 6.92 (m, 1H), 6.73 (t,  $J = 7.8$  Hz, 1H), 4.48 (dd,  $J = 11.5, 3.8$  Hz, 1H), 4.2 (t,  $J = 12.1$  Hz, 1H), 3.13 – 3.05 (m, 1H), 1.77 (dt,  $J = 12.5, 4.1$  Hz, 1H), 1.26 (d,  $J = 7.1$  Hz, 3H), 1.26 (s, 12H).  $^{13}\text{C NMR}$  ( $\text{CDCl}_3$ , 100 MHz)  $\delta$ : 149.88, 130.57, 127.83, 127.71, 121.38, 119.84, 83.73, 64.22, 30.15, 25.06, 24.78, 21.73. TOF-HRMS Calcd. for  $\text{C}_{16}\text{H}_{23}\text{BClO}_3$   $[\text{M}+\text{H}^+]$ : 309.1426, found 309.1420. 90% ee, dr > 99:1;  $[\alpha]_{\text{D}}^{25} = -36.6$  ( $c = 1, \text{CH}_2\text{Cl}_2$ ); Enantiomeric excess of the corresponding hydroxyl compound obtained by oxidation with  $\text{NaBO}_3$  in  $\text{THF}/\text{H}_2\text{O}$  (1:1); SFC condition: Lux 5u Cellulose-4 ( $250 \times 4.60$  mm),  $\text{MeOH}:\text{CO}_2 = 10:90$ , 3 mL/min, 230 nm;  $t_{\text{A}} = 4.1$  min (major),  $t_{\text{B}} = 5.5$  min (minor).

### 2-(6-bromo-4-methylchroman-3-yl)-4,4,5,5-tetramethyl-1,3,2-dioxaborolane (4h)

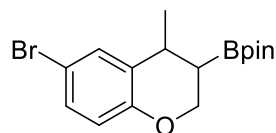

59 mg, 56% yield;  $^1\text{H NMR}$  ( $\text{CDCl}_3$ , 400 MHz)  $\delta$ : 7.13 (dd,  $J = 5.1, 1.5$  Hz, 2H), 6.66 – 6.63 (m, 1H), 4.31 (ddd,  $J = 7.7, 2.4, 0.7$  Hz, 1H), 4.15 – 4.09 (m, 1H), 3.06 – 3.00 (m, 1H), 1.73 (dt,  $J = 8.2, 2.8$  Hz, 1H), 1.25 (d,  $J = 5.1$  Hz, 3H), 1.25 (s, 12H).  $^{13}\text{C NMR}$  ( $\text{CDCl}_3$ , 100 MHz)  $\delta$ : 153.33, 131.75, 130.94, 130.07, 118.69, 111.70, 83.72, 63.54, 29.94, 25.03, 24.79, 21.66. TOF-HRMS Calcd. for  $\text{C}_{16}\text{H}_{23}\text{BBrO}_3$   $[\text{M}+\text{H}^+]$ : 353.0921, found 353.0918. 84% ee, dr > 99:1;  $[\alpha]_{\text{D}}^{25} = -8.2$  ( $c = 1, \text{CH}_2\text{Cl}_2$ ); Enantiomeric excess of the corresponding hydroxyl compound obtained by oxidation with  $\text{NaBO}_3$  in  $\text{THF}/\text{H}_2\text{O}$  (1:1); SFC condition: Lux 5u Cellulose-1 ( $250 \times 4.60$  mm),  $\text{MeOH}:\text{CO}_2 = 10:90$ , 3 mL/min, 230 nm;  $t_{\text{A}} = 4.0$  min (major),  $t_{\text{B}} = 4.4$  min (minor).

#### 2-(7-bromo-4-methylchroman-3-yl)-4,4,5,5-tetramethyl-1,3,2-dioxaborolane (4i)

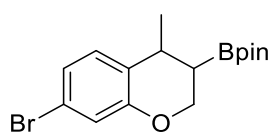

White solid, 43.1 mg, 61%.  $^1\text{H NMR}$  ( $\text{CDCl}_3$ , 600 MHz)  $\delta$  7.15 – 7.13 (m, 2H), 6.67 – 6.65 (m, 1H), 4.32 (ddd,  $J = 11.4, 3.7, 1.3$  Hz, 1H), 4.13 (dd,  $J = 12.5, 11.5$  Hz, 1H), 3.07 – 3.02 (m, 1H), 1.74 (dt,  $J = 12.5, 4.2$  Hz, 1H), 1.26 (d,  $J = 6.7$  Hz, 15H).  $^{13}\text{C NMR}$  ( $\text{CDCl}_3$ , 151 MHz)  $\delta$  153.2, 131.7, 130.8, 130.0, 118.6, 111.6, 83.6, 63.4, 29.8, 24.9, 24.7, 21.6. TOF-HRMS Calcd. for  $\text{C}_{16}\text{H}_{23}\text{BBrO}_3$  [ $\text{M}+\text{H}^+$ ]: 354.0918, found 354.0919. 99.9% ee, dr > 99:1.  $[\alpha]_{\text{D}}^{30} = -31.8$  ( $c = 1.0$ ,  $\text{CH}_2\text{Cl}_2$ ). Enantiomeric excess of the corresponding hydroxyl compound obtained by oxidation with  $\text{NaBO}_3$  in  $\text{THF}/\text{H}_2\text{O}$  (1:1).

#### 4,4,5,5-tetramethyl-2-(4,6,8-trimethylchroman-3-yl)-1,3,2-dioxaborolane (4j)

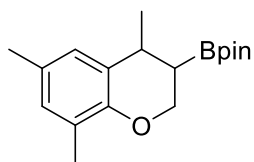

61 mg, 68 % yield;  $^1\text{H NMR}$  ( $\text{CDCl}_3$ , 400 MHz)  $\delta$ : 6.77 – 6.67 (dd,  $J = 24.0, 1.6$  Hz, 2H), 4.35 (ddd,  $J = 11.4, 3.7, 1.3$  Hz, 1H), 4.12 (dd,  $J = 12.5, 11.4$  Hz, 1H), 3.07 – 2.98 (m, 1H), 2.17 (d,  $J = 31.0$  Hz, 3H), 1.78 – 1.71 (m, 1H), 1.26 (d,  $J = 5.7$  Hz, 3H), 1.26 (s, 12H).  $^{13}\text{C NMR}$  ( $\text{CDCl}_3$ , 100 MHz)  $\delta$ : 150.10, 129.20, 128.04, 127.90, 127.22, 125.60, 83.51, 63.23, 29.99, 25.08, 24.76, 22.07, 20.52, 16.10. TOF-HRMS Calcd. for  $\text{C}_{18}\text{H}_{28}\text{BO}_3$  [ $\text{M}+\text{H}^+$ ]: 303.2129, found 303.2132. 99.9% ee, dr > 99:1;  $[\alpha]_{\text{D}}^{25} = -64.6$  ( $c = 1$ ,  $\text{CH}_2\text{Cl}_2$ ); Enantiomeric excess of the corresponding hydroxyl compound obtained by oxidation with  $\text{NaBO}_3$  in  $\text{THF}/\text{H}_2\text{O}$  (1:1); SFC condition: Lux 5u Cellulose-4 ( $250 \times 4.60$  mm), MeOH:  $\text{CO}_2 = 10:90$ , 3 mL/min, 230 nm;  $t_{\text{A}} = 3.2$  min (major),  $t_{\text{B}} = 3.5$  min (minor).

#### 4,4,5,5-tetramethyl-2-(4,5,8-trimethylchroman-3-yl)-1,3,2-dioxaborolane (4k)

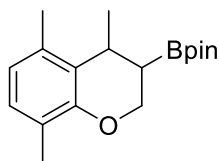

82 mg, 68% yield;  $^1\text{H NMR}$  ( $\text{CDCl}_3$ , 600 MHz)  $\delta$ : 6.86 (d,  $J = 7.5$  Hz, 1H), 6.59 (d,  $J = 7.5$  Hz, 1 H), 4.40 (ddd,  $J = 11.4, 3.9, 1.4$  Hz, 1H), 4.23 (dd,  $J = 13.1, 11.5$  Hz, 1H), 3.19 – 3.13 (m, 1H), 2.27 (s, 3H), 2.14 (s, 3H), 1.70 (dt,  $J = 13.1, 4.1$  Hz, 1H), 1.29 (s, 12H), 1.21 (d,  $J = 7.0$  Hz, 3H).  $^{13}\text{C NMR}$  ( $\text{CDCl}_3$ , 150 MHz)  $\delta$ : 151.94,



133.83, 127.90, 126.47, 123.51, 120.93, 83.57, 77.32, 77.11, 76.90, 62.59, 27.26, 25.10, 24.78, 19.27, 18.38, 16.26. TOF-HRMS Calcd. for C<sub>18</sub>H<sub>28</sub>BO<sub>3</sub> [M+H<sup>+</sup>]: 303.2129, found 303.2131. 99% ee, dr > 99:1; [ $\alpha$ ]<sub>D</sub><sup>25</sup> = -51.3 (c = 1, CH<sub>2</sub>Cl<sub>2</sub>); Enantiomeric excess of the corresponding hydroxyl compound obtained by oxidation with NaBO<sub>3</sub> in THF/H<sub>2</sub>O (1:1); SFC condition: Lux 5u Amylose-1 (250 × 4.60 mm), MeOH: CO<sub>2</sub> = 10:90, 3 mL/min, 230 nm; t<sub>A</sub> = 3.0 min (major), t<sub>B</sub> = 3.2 min (minor).

#### 2-(4,6-dimethylthiochroman-3-yl)-4,4,5,5-tetramethyl-1,3,2-dioxaborolane (4l)

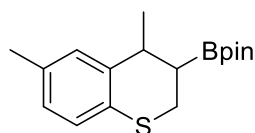

50 mg, 55% yield; <sup>1</sup>H NMR (CDCl<sub>3</sub>, 400 MHz)  $\delta$ : 6.98 – 6.93 (dd, *J* = 8.4, 0.6 Hz, 1H), 6.85 (d, *J* = 6.9 Hz, 2H), 3.26 – 3.18 (td, *J* = 13.5, 1.0 Hz, 1H), 3.14 (qd, *J* = 7.1, 3.0 Hz, 1H), 3.00 (dd, *J* = 12.6, 3.7 Hz, 1H), 2.23 (s, 3H), 1.62 – 1.55 (m, 1H), 1.25 (d, *J* = 1.1 Hz, 12H), 1.16 (dd, *J* = 7.1, 1.0 Hz, 3H). <sup>13</sup>C NMR (CDCl<sub>3</sub>, 100 MHz)  $\delta$ : 139.35, 133.10, 130.12, 128.32, 127.34, 126.32, 83.70, 77.41, 77.09, 76.77, 33.99, 25.00, 24.77, 23.66, 20.89, 19.81. TOF-HRMS Calcd. for C<sub>17</sub>H<sub>26</sub>BO<sub>2</sub>S [M+H<sup>+</sup>]: 305.1744, found 305.1741. 99.9% ee, dr > 99:1; [ $\alpha$ ]<sub>D</sub><sup>25</sup> = -25.9 (c = 1, CH<sub>2</sub>Cl<sub>2</sub>); Enantiomeric excess of the corresponding hydroxyl compound obtained by oxidation with NaBO<sub>3</sub> in THF/H<sub>2</sub>O (1:1); SFC condition: Lux 5u Amylose-2 (250 × 4.60 mm), MeOH: CO<sub>2</sub> = 10:90, 3 mL/min, 254 nm; t<sub>A</sub> = 2.9 min (major), t<sub>B</sub> = 3.1 min (minor).

#### 4-methyl-8-phenylchroman-3-ol (5)

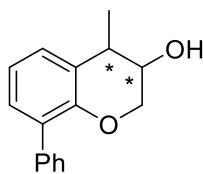

48 mg, 92 % yield; <sup>1</sup>H NMR (600 MHz, CDCl<sub>3</sub>)  $\delta$ : 7.54 – 7.49 (m, 2H), 7.42 – 7.36 (m, 2H), 7.35 – 7.29 (m, 1H), 7.19 (dd, *J* = 15.5, 8.2 Hz, 2H), 6.99 (t, *J* = 7.6 Hz, 1H), 4.21 (dd, *J* = 11.1, 4.8 Hz, 1H), 4.14 – 4.05 (m, 2H), 3.18 (q, *J* = 9.4, 8.1 Hz, 1H), 1.78 (s, 1H), 1.44 (d, *J* = 7.1 Hz, 3H). <sup>13</sup>C NMR (150 MHz, CDCl<sub>3</sub>)  $\delta$ : 150.30,

138.49, 129.96, 129.67, 129.31, 128.18, 128.06, 127.06, 125.59, 121.58, 69.03, 66.98, 35.45, 16.11. TOF-HRMS Calcd. for  $C_{16}H_{16}O_2$   $[M+H^+]$ : 263.1042, found 263.1041. 99.5% ee, dr > 99:1;  $[\alpha]_D^{25} = -20.1$  (c = 1,  $CH_2Cl_2$ ); SFC condition: Lux 5u Cellulose-1 (250 × 4.60 mm), MeOH:CO<sub>2</sub> = 10:90, 3 mL/min, 230 nm;  $t_A = 4.0$  min (major),  $t_B = 4.4$  min (minor).

### 3-(furan-2-yl)-4-methyl-8-phenylchromane (6)

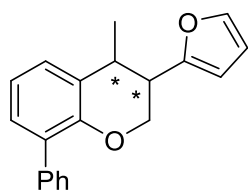

22 mg, 62 % yield; <sup>1</sup>H NMR (600 MHz, CDCl<sub>3</sub>) δ: 7.54 (d, *J* = 7.1 Hz, 2H), 7.43 – 7.34 (m, 3H), 7.34 – 7.29 (m, 1H), 7.16 (dd, *J* = 22.7, 7.5 Hz, 2H), 6.96 (m, 1H), 6.33 (d, *J* = 3.3 Hz, 1H), 6.03 (d, *J* = 3.4 Hz, 1H), 4.42 (dd, *J* = 9.9, 3.8 Hz, 1H), 4.30 (m, 1H), 3.52 (dt, *J* = 10.2, 4.5 Hz, 1H), 3.37 (m, 1H), 1.13 (d, *J* = 6.9 Hz, 3H). <sup>13</sup>C NMR (150 MHz, CDCl<sub>3</sub>) δ: 153.62, 150.60, 141.44, 138.68, 130.06, 129.66, 129.12, 128.91, 128.03, 127.49, 126.96, 120.41, 110.16, 105.80, 63.79, 36.62, 33.58, 19.10. TOF-HRMS Calcd. for  $C_{20}H_{18}O_2$   $[M+H^+]$ : 291.1384, found 291.1382. 99.5% ee, dr > 99:1;  $[\alpha]_D^{25} = -14.2$  (c = 0.5,  $CH_2Cl_2$ ); SFC condition: Lux 5u Cellulose-1 (250 × 4.60 mm), MeOH:CO<sub>2</sub> = 5:95, 3 mL/min, 230 nm;  $t_A = 6.2$  min (minor),  $t_B = 7.7$  min (major).

### 7-bromo-4-methylchroman-3-ol (7)

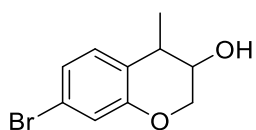

White solid, 41.3 mg, 85%. <sup>1</sup>H NMR (CDCl<sub>3</sub>, 600 MHz) δ 7.26 – 7.25 (m, 1H), 7.18 (d, *J* = 8.7 Hz, 1H), 6.69 (d, *J* = 8.7 Hz, 1H), 4.20 – 4.17 (m, 1H), 4.06 (d, *J* = 11.3 Hz, 1H), 4.01 (s, 1H), 3.06 – 3.02 (m, 1H), 1.97 – 1.93 (m, 1H), 1.36 (d, *J* = 7.0 Hz, 3H). <sup>13</sup>C NMR (CDCl<sub>3</sub>, 151 MHz) δ 152.4, 131.2, 130.5, 127.1, 118.2, 113.2, 69.0, 66.4, 34.3, 15.5. TOF-HRMS Calcd. for  $C_{10}H_{12}BrO_2$   $[M+H^+]$ : 243.0015, found 243.0018. 99.9% ee, dr > 99:1.  $[\alpha]_D^{30} = 36.2$  (c = 1.0,  $CH_2Cl_2$ ). HPLC condition: Lux 5u Amylose-1 (250 × 4.60 mm), ipa : hex = 10:90, 1.0 mL/min, 254 nm;  $t_A = 8.2$  min (minor),  $t_B = 11.3$  min (major).

### 7-bromo-4-methylchroman-3-yl methanesulfonate (8)

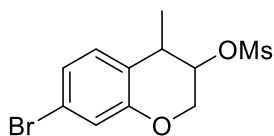

White solid, 57.3 mg, 89%. <sup>1</sup>H NMR (CDCl<sub>3</sub>, 600 MHz) δ 7.27 (dd, *J* = 2.4, 1.1 Hz, 1H), 7.24 (ddd, *J* = 8.6, 2.5, 0.8 Hz, 1H), 6.73 (d, *J* = 8.7 Hz, 1H), 5.08 (td, *J* = 4.5, 1.8 Hz, 1H), 4.47 (dd, *J* = 12.1, 4.6 Hz, 1H), 4.19 (dt, *J* = 12.1, 1.5 Hz, 1H), 3.30 – 3.26 (m, 1H), 3.07 (s, 3H), 1.44 (d, *J* = 7.0 Hz, 3H). <sup>13</sup>C NMR (CDCl<sub>3</sub>, 101 MHz) δ 152.1, 131.0, 130.6, 125.5, 118.3, 113.4, 74.8, 66.2, 38.8, 33.1, 15.9. TOF-HRMS Calcd. for C<sub>11</sub>H<sub>14</sub>BrO<sub>4</sub>S [M+H<sup>+</sup>]: 320.9791, found 320.9795. 99% ee, dr > 99:1. [α]<sub>D</sub><sup>30</sup> = 1.34 (c = 1.0, CH<sub>2</sub>Cl<sub>2</sub>). HPLC condition: Lux 5u Amylose-1 (250 × 4.60 mm), ipa : hex = 7:93, 1.0 mL/min, 210 nm; t<sub>A</sub> = 20.2 min (minor), t<sub>B</sub> = 25.0 min (major).

### 7-bromo-4-methylchroman-3-yl 4-methylbenzenesulfonate (9)

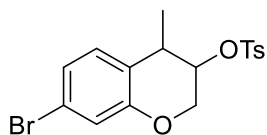

White solid, 60.2 mg, 75%. <sup>1</sup>H NMR (CDCl<sub>3</sub>, 600 MHz) δ 7.82 – 7.80 (m, 2H), 7.35 (dt, *J* = 7.6, 0.8 Hz, 2H), 7.20 – 7.18 (m, 2H), 6.67 – 6.66 (m, 1H), 4.88 (ddd, *J* = 5.7, 4.6, 2.4 Hz, 1H), 4.23 (dd, *J* = 11.7, 5.7 Hz, 1H), 4.06 (ddd, *J* = 11.7, 2.3, 1.2 Hz, 1H), 3.14 (dddd, *J* = 7.5, 6.5, 5.5, 4.1 Hz, 1H), 2.46 (s, 3H), 1.27 (d, *J* = 7.0 Hz, 3H). <sup>13</sup>C NMR (CDCl<sub>3</sub>, 151 MHz) δ 152.1, 145.2, 133.6, 130.9, 130.8, 130.0, 127.8, 125.8, 118.3, 113.2, 75.3, 65.3, 33.2, 21.7, 16.0. TOF-HRMS Calcd. for C<sub>17</sub>H<sub>18</sub>BrO<sub>4</sub>S [M+H<sup>+</sup>]: 397.0104, found 397.0105. 97% ee, dr > 99:1. [α]<sub>D</sub><sup>30</sup> = 39.3 (c = 1.0, CH<sub>2</sub>Cl<sub>2</sub>). HPLC condition: Lux 5u Amylose-1 (250 × 4.60 mm), ipa : hex = 10:90, 1.0 mL/min, 210 nm; t<sub>A</sub> = 13.5 min (minor), t<sub>B</sub> = 16.8 min (major).

## 6. X-ray Crystallography

Single-crystal X-ray diffraction measurements were carried out on a Rigaku Saturn CCD diffractometer at 100(2) K using graphite monochromated Cu Kα radiation (λ =

1.54184 Å). An empirical absorption correction was applied using the SADABS program.<sup>7</sup> All structures were solved by direct methods and refined by full-matrix least squares on  $F^2$  using the SHELXL program package.<sup>8</sup> All the hydrogen atoms were geometrically fixed using the riding model. The crystal data and experimental data for **1b**, **2a** and **2p** are summarized in **Table S1**.

## Crystal parameters

**Table S1. Crystal Data and Experimental Parameters for Compounds 2i and 4j**

| Compound                                                      | <b>2i</b>                                             | <b>4j</b>                                             |
|---------------------------------------------------------------|-------------------------------------------------------|-------------------------------------------------------|
| Formula                                                       | C <sub>23</sub> H <sub>28</sub> BNO <sub>4</sub>      | C <sub>18</sub> H <sub>27</sub> NBO <sub>3</sub>      |
| Fw                                                            | 393.27                                                | 302.2                                                 |
| crystal system                                                | orthorhombic                                          | orthorhombic                                          |
| space group                                                   | <i>P</i> 2 <sub>1</sub> 2 <sub>1</sub> 2 <sub>1</sub> | <i>P</i> 2 <sub>1</sub> 2 <sub>1</sub> 2 <sub>1</sub> |
| <i>a</i> (Å)                                                  | 9.566(2)                                              | 7.331(2)                                              |
| <i>b</i> (Å)                                                  | 12.058(3)                                             | 13.344(3)                                             |
| <i>c</i> (Å)                                                  | 18.415(4)                                             | 17.277(4)                                             |
| $\alpha$ (deg)                                                | 90                                                    | 90                                                    |
| $\beta$ (deg)                                                 | 90                                                    | 90                                                    |
| $\gamma$ (deg)                                                | 90                                                    | 90                                                    |
| <i>V</i> (Å <sup>3</sup> )                                    | 2124.16(8)                                            | 1690.05(7)                                            |
| <i>Z</i>                                                      | 4                                                     | 4                                                     |
| <i>D</i> <sub>calc</sub> (g/cm <sup>3</sup> )                 | 1.230                                                 | 1.188                                                 |
| $\mu$ (Mo/K $\alpha$ ) <sub>calc</sub> (cm <sup>-1</sup> )    | 0.662                                                 | 0.613                                                 |
| size (mm)                                                     | 0.20 × 0.20 × 0.20                                    | 0.25 × 0.21 × 0.15                                    |
| <i>F</i> (000)                                                | 840                                                   | 656                                                   |
| 2 $\theta$ range (deg)                                        | 8.77 to 151.55                                        | 8.37 to 144.15                                        |
| no. of reflns, collected                                      | 13039                                                 | 6016                                                  |
| no of obsd reflns                                             | 4240                                                  | 3222                                                  |
| no of variables                                               | 297                                                   | 206                                                   |
| abscorr ( <i>T</i> <sub>max</sub> , <i>T</i> <sub>min</sub> ) | 1.00, 0.76                                            | 1.00, 0.94                                            |
| <i>R</i>                                                      | 0.044                                                 | 0.038                                                 |
| <i>R</i> <sub>w</sub>                                         | 0.11                                                  | 0.098                                                 |

|                              |          |          |
|------------------------------|----------|----------|
| $R_{\text{all}}$             | 0.045    | 0.039    |
| Absolute structure parameter | -0.02(7) | -0.04(9) |
| Gof                          | 1.053    | 1.06     |
| CCDC                         | 2174322  | 2174323  |

---

## 7. References

- [1] D. Kong, S. Han, G. Zi, G. Hou and J. Zhang, *J. Org. Chem.* 2018, **83**, 1924.
- [2] V. K. Tiwari, G. G. Pawar, R. Das, A. Adhikary and M. Kapur, *Org. Lett.* 2013, **15**, 3310.
- [3] U. M. Battisti, S. Corrado, C. Sorbi, A. Cornia, A. Tait, D. Malfacini, M. C. Cerlesi, G. Calo and L. Brasili, *Med. Chem. Commun.* 2014, **5**, 973.
- [4] D. R. Boyd, N. D. Sharma, N. I. Bowers, R. Boyle, J. S. Harrison, K. Lee, T. D. H. Bugg and D. T. Gibson, *Org. Biomol. Chem.* 2003, **1**, 1298.
- [5] U. A. More, S. D. Joshi, T. M. Aminabhavi, A. K. Gadad, M. N. Nadagouda and V. H. Kulkarni, *Eur. J. Med. Chem.* 2014, **71**, 199.
- [6] Y. Sawada, T. Yanai, H. Nakagawa, Y. Tsukamoto, S. Yokoi, M. Yanagi, T. Toya, H. Sugizaki, Y. Kato, H. Shirakura, T. Watanabe, Y. Yajima, S. Kodama and A. Masui, *Pest Manag Sci.* 2002, **59**, 36.
- [7] G. M. Sheldrick, SADABS, Program for Empirical Absorption Correction of Area Detector Data, University of Göttingen, Göttingen, Germany, 1996.
- [8] G. M. Sheldrick, *Acta Cryst.*, 2008, **A64**, 112.

## 8. NMR spectra of all compounds.

### Methyl quinoline-1(2*H*)-carboxylate (1a)

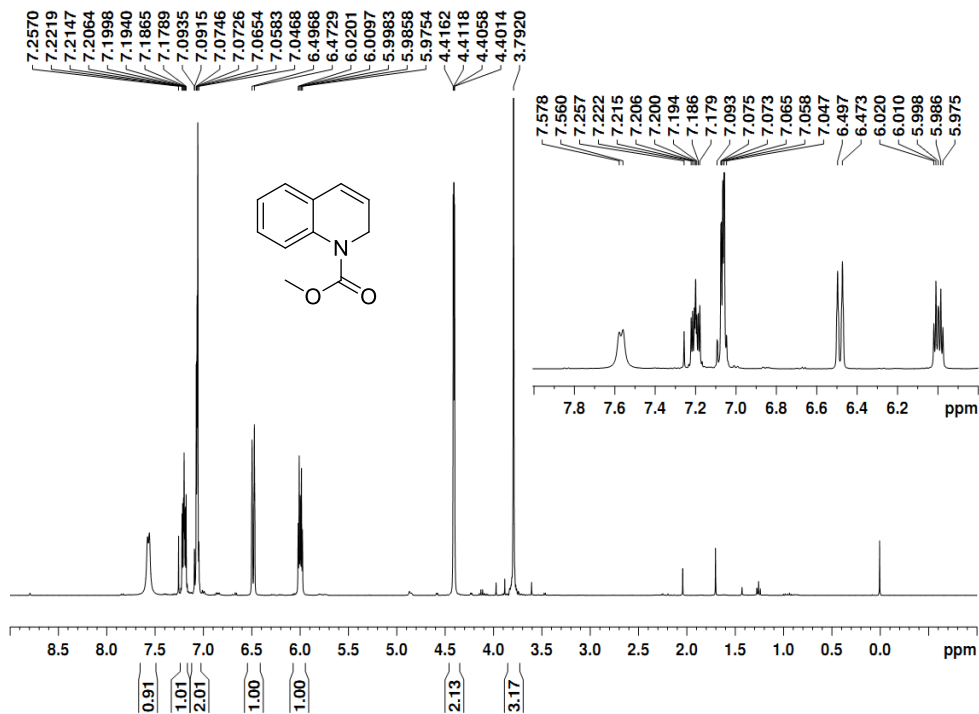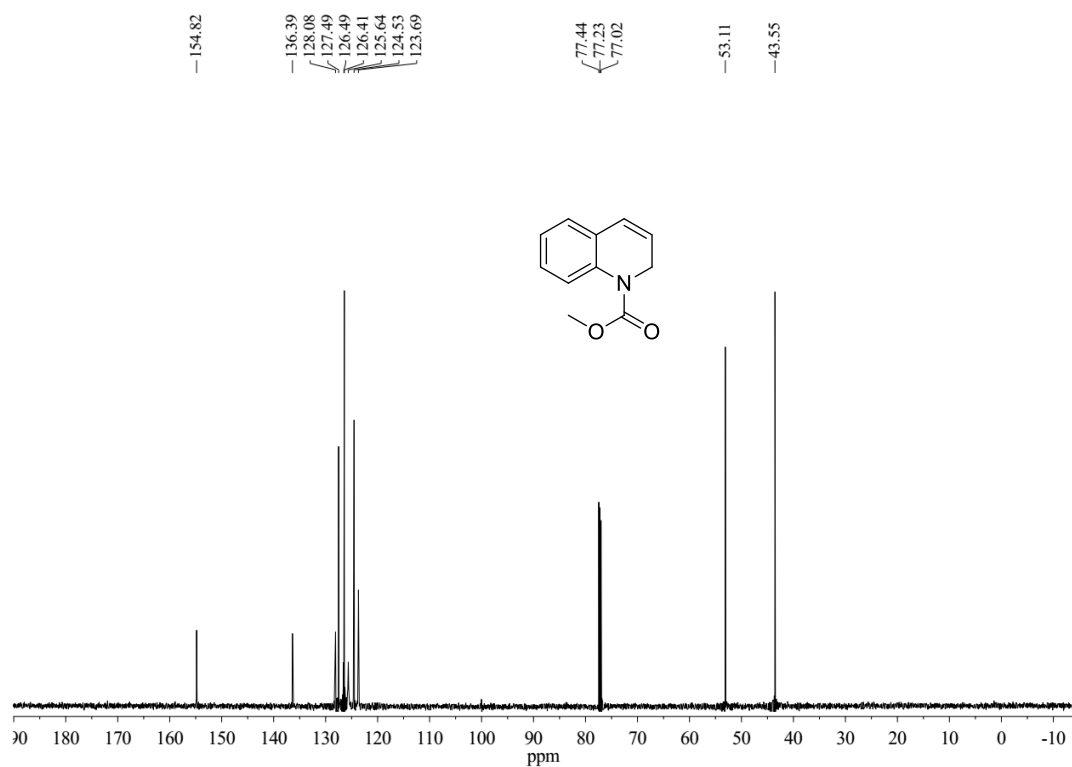

# Methyl 6-methylquinoline-1(2H)-carboxylate (1b)

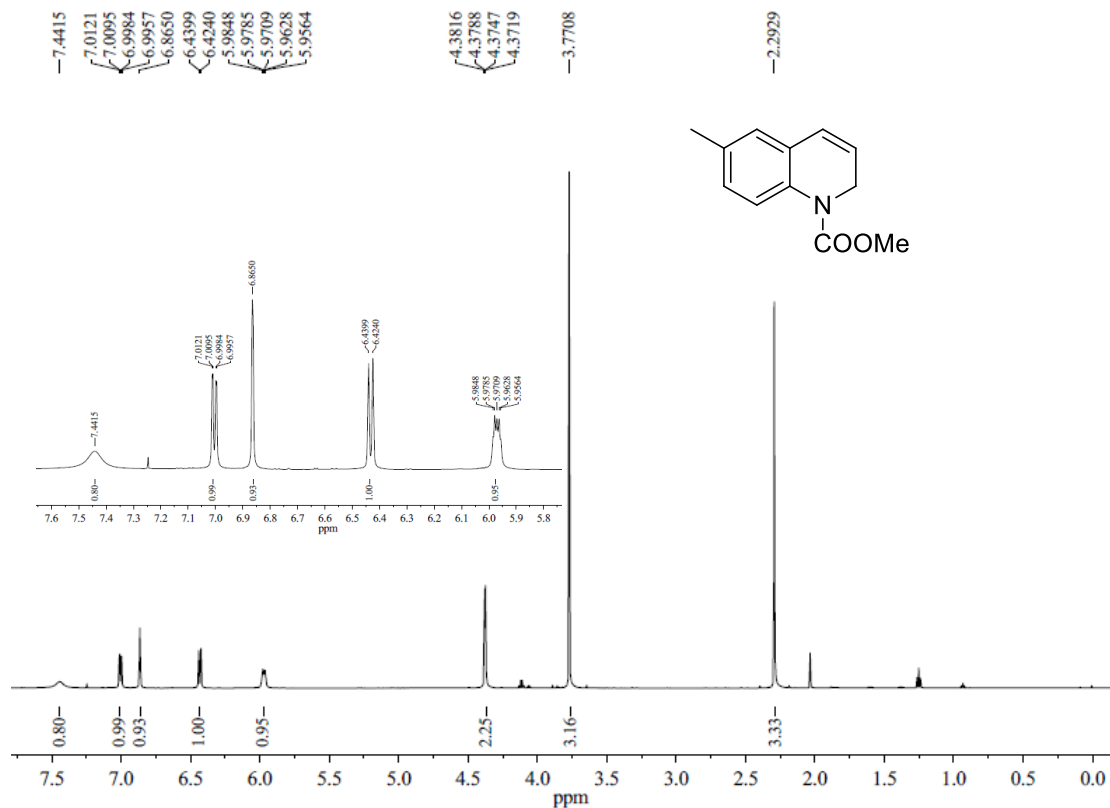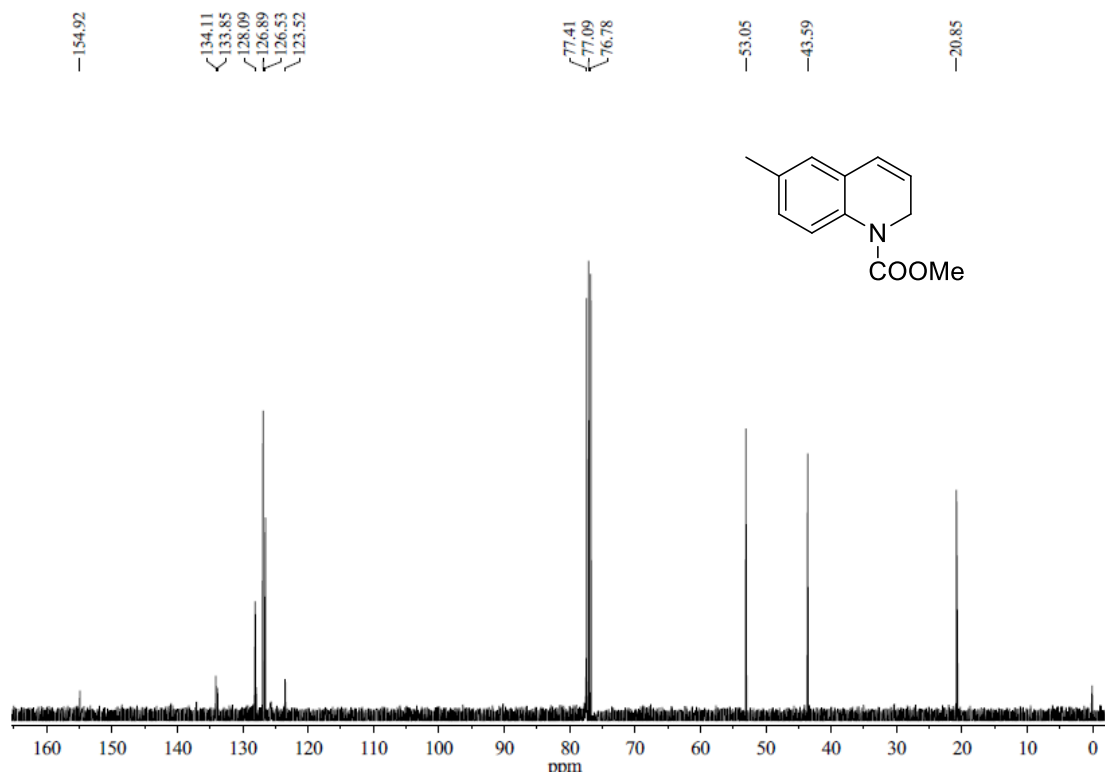

Methyl 7-methylquinoline-1(2H)-carboxylate (1c)

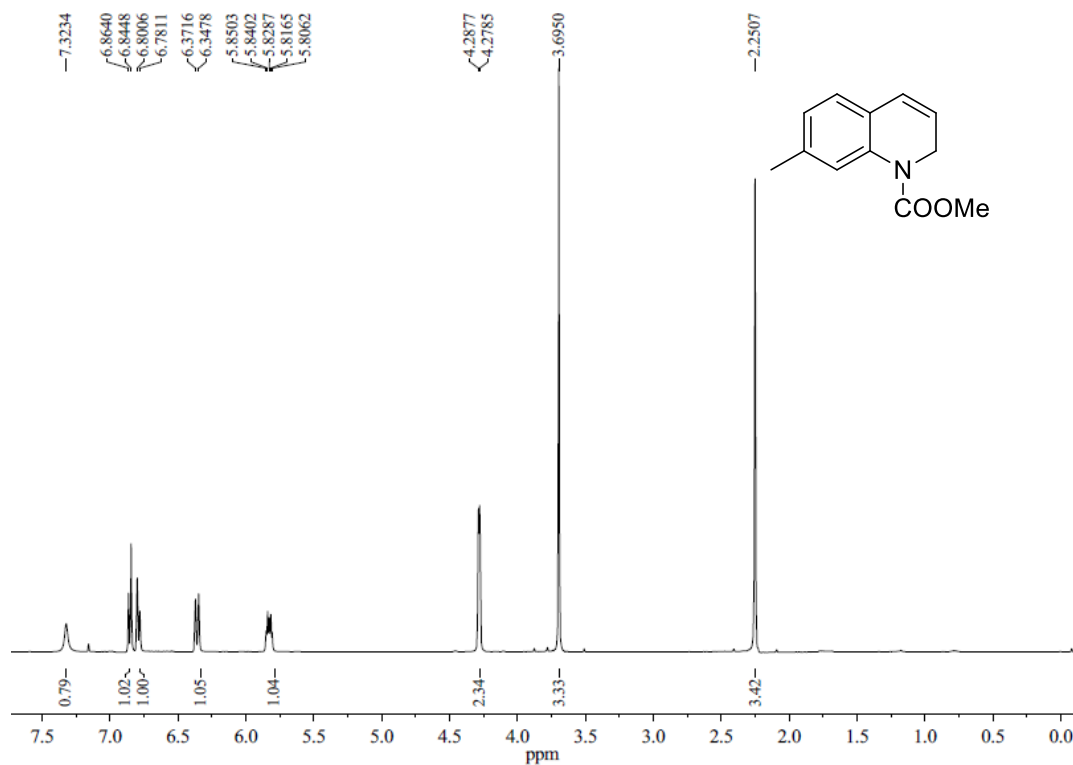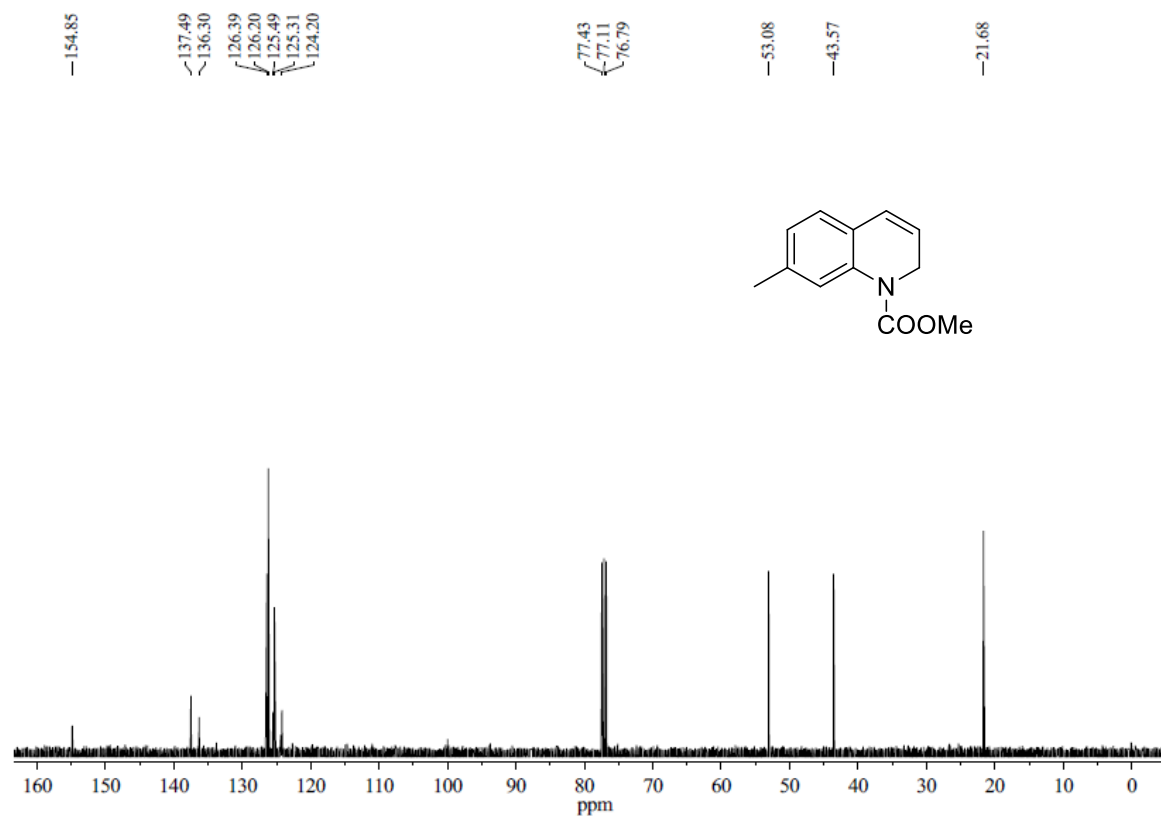



Methyl 6-methoxyquinoline-1(2H)-carboxylate (1d)

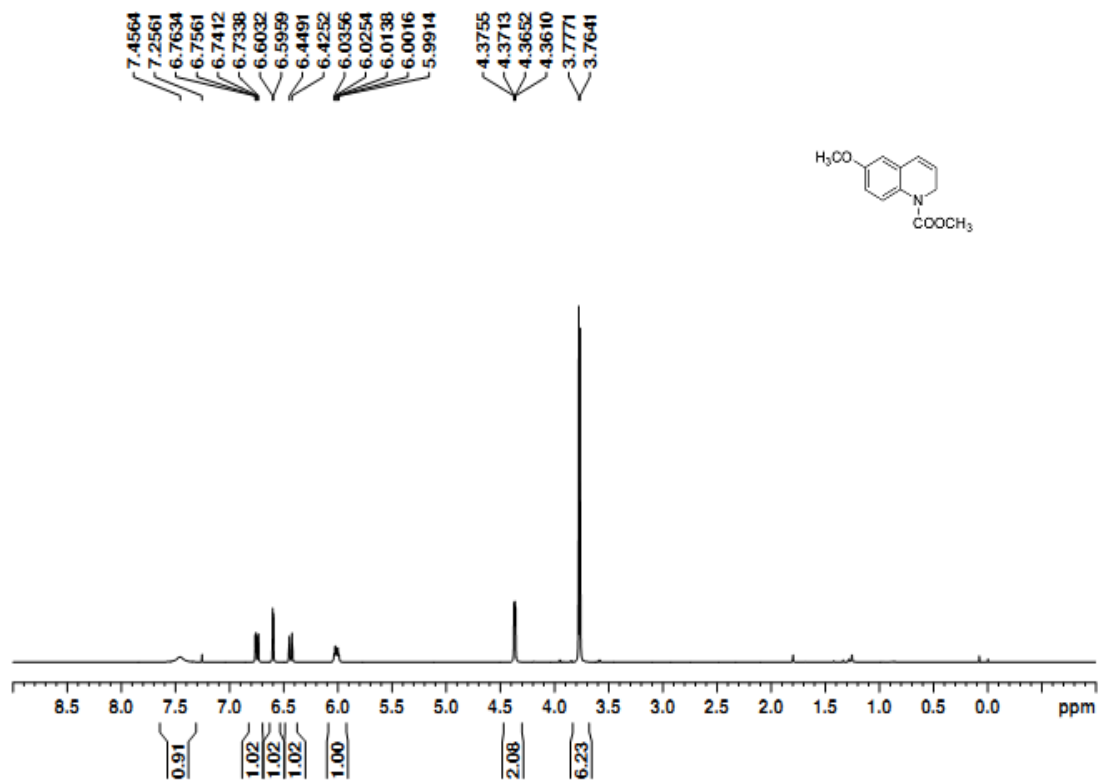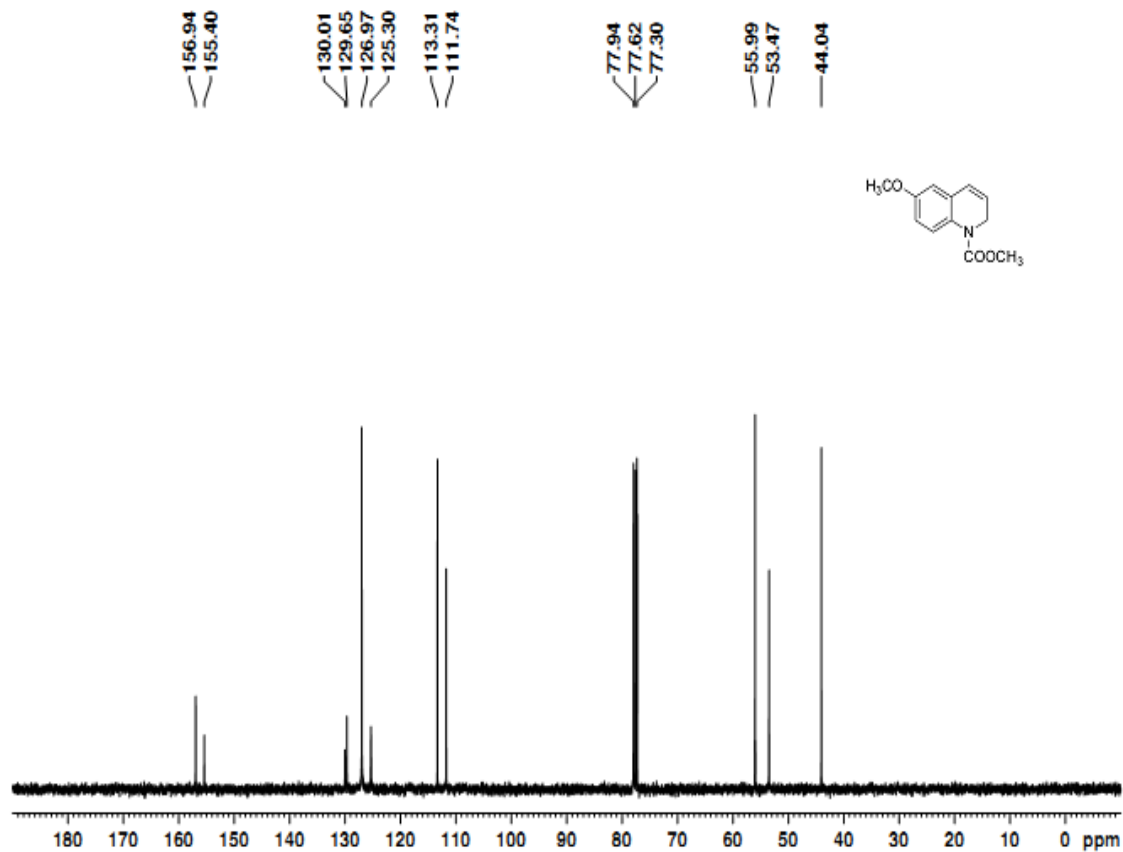

# Methyl 6-bromoquinoline-1(2H)-carboxylate (1e)

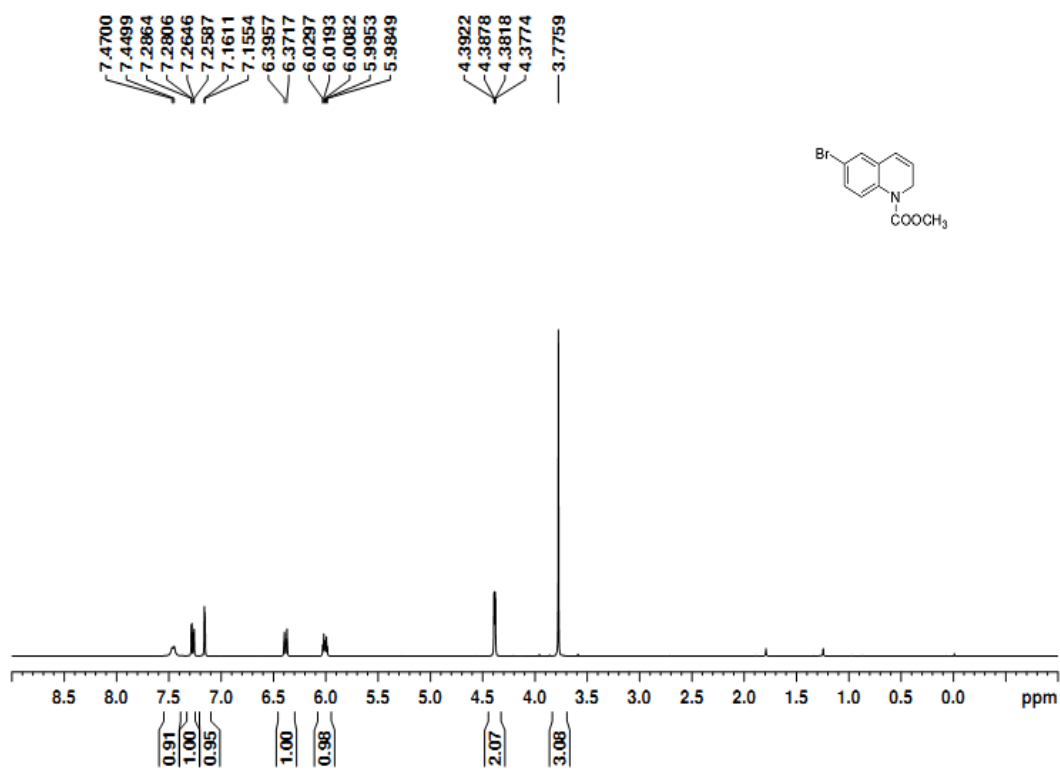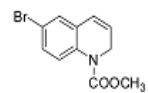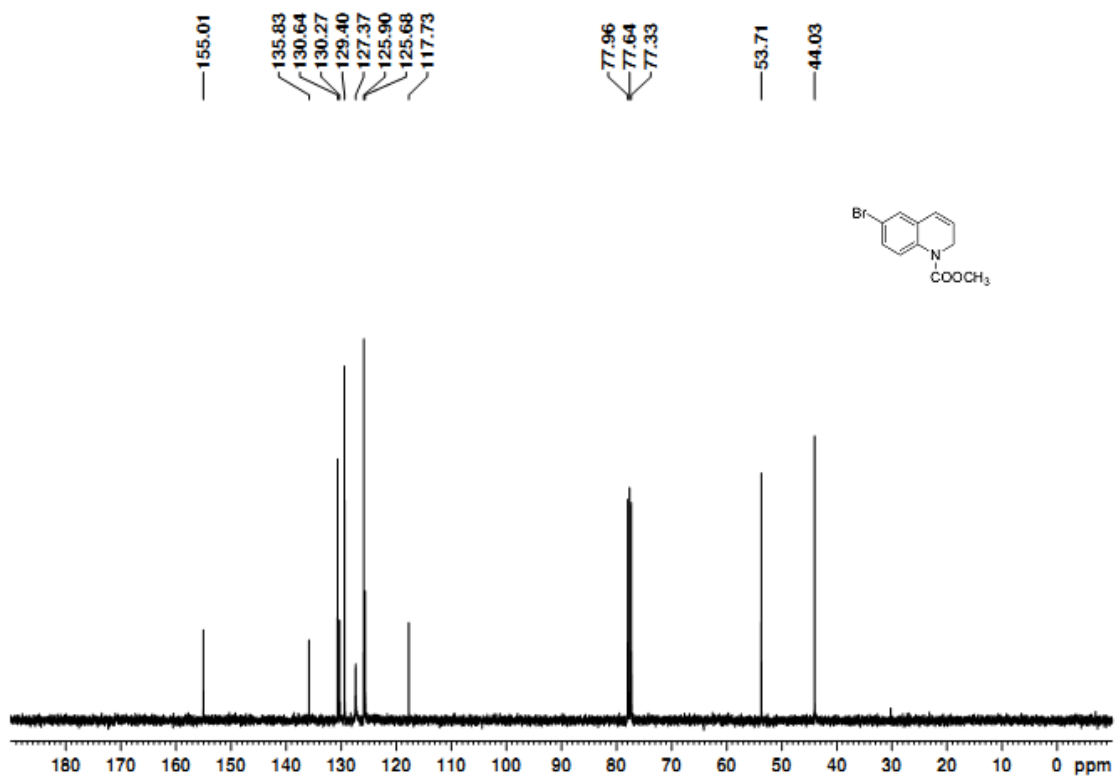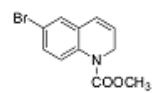

Methyl 7-bromoquinoline-1(2H)-carboxylate (1f)

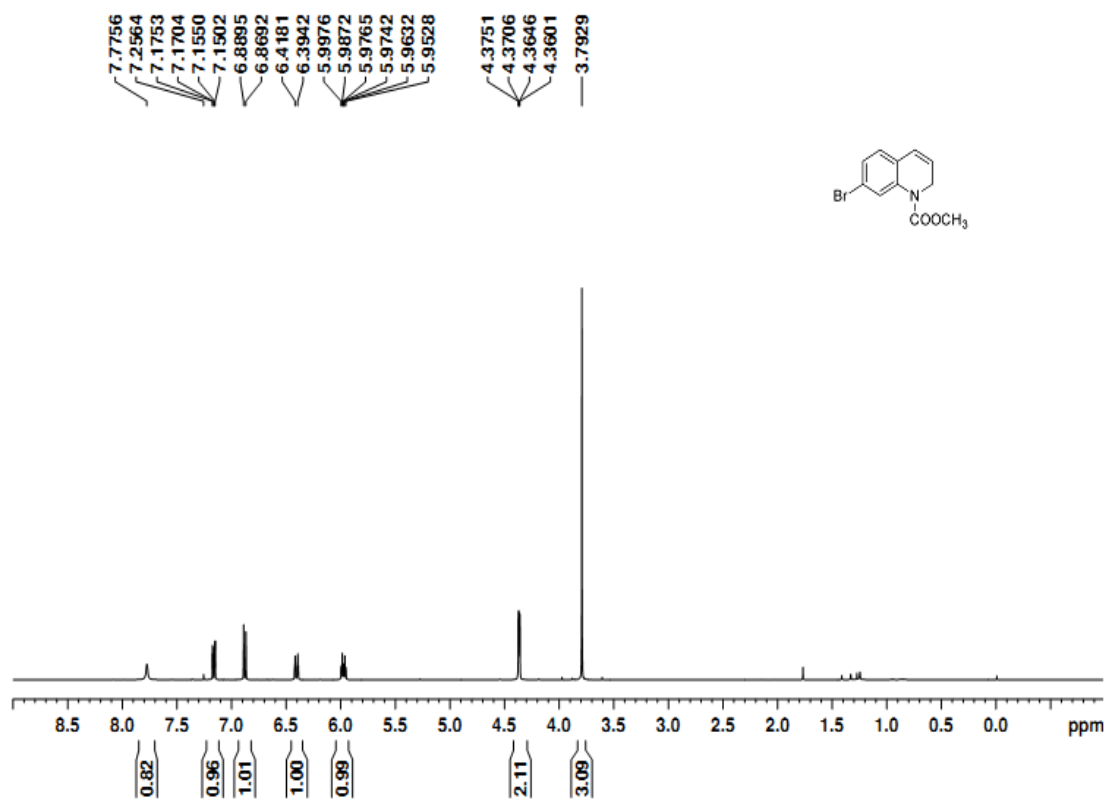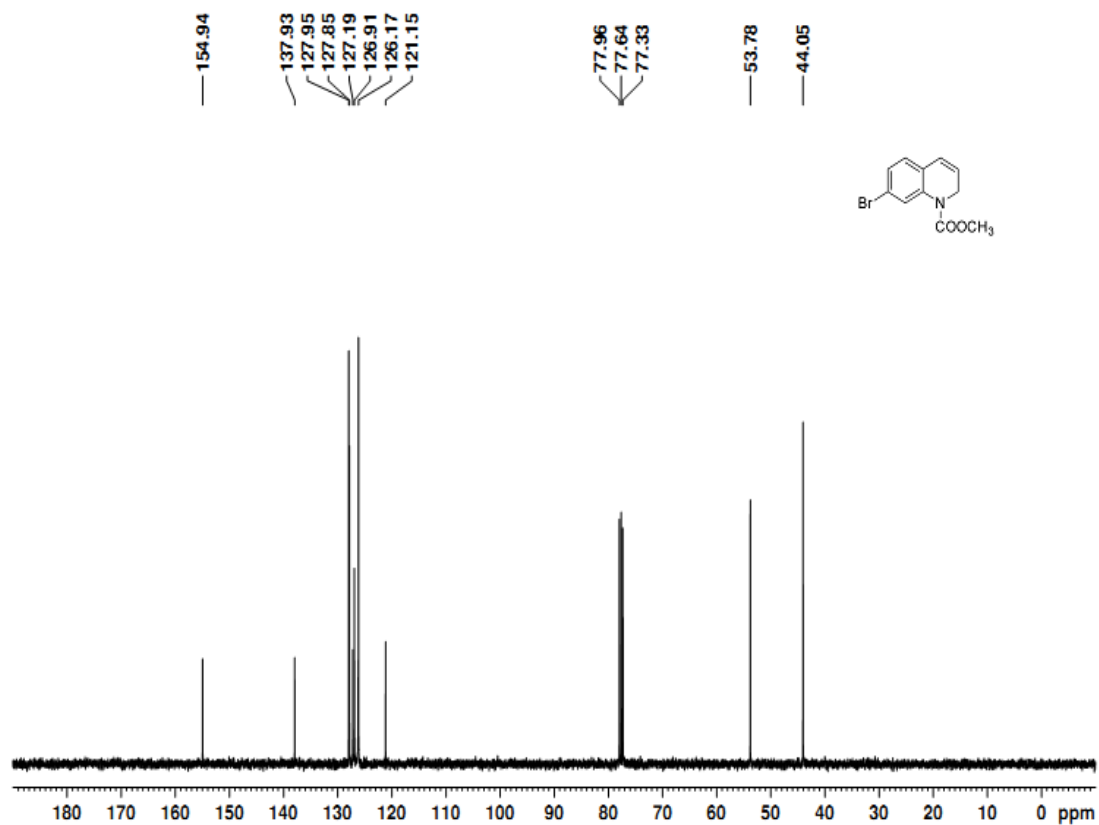

Isopropyl quinoline-1(2H)-carboxylate (1g)

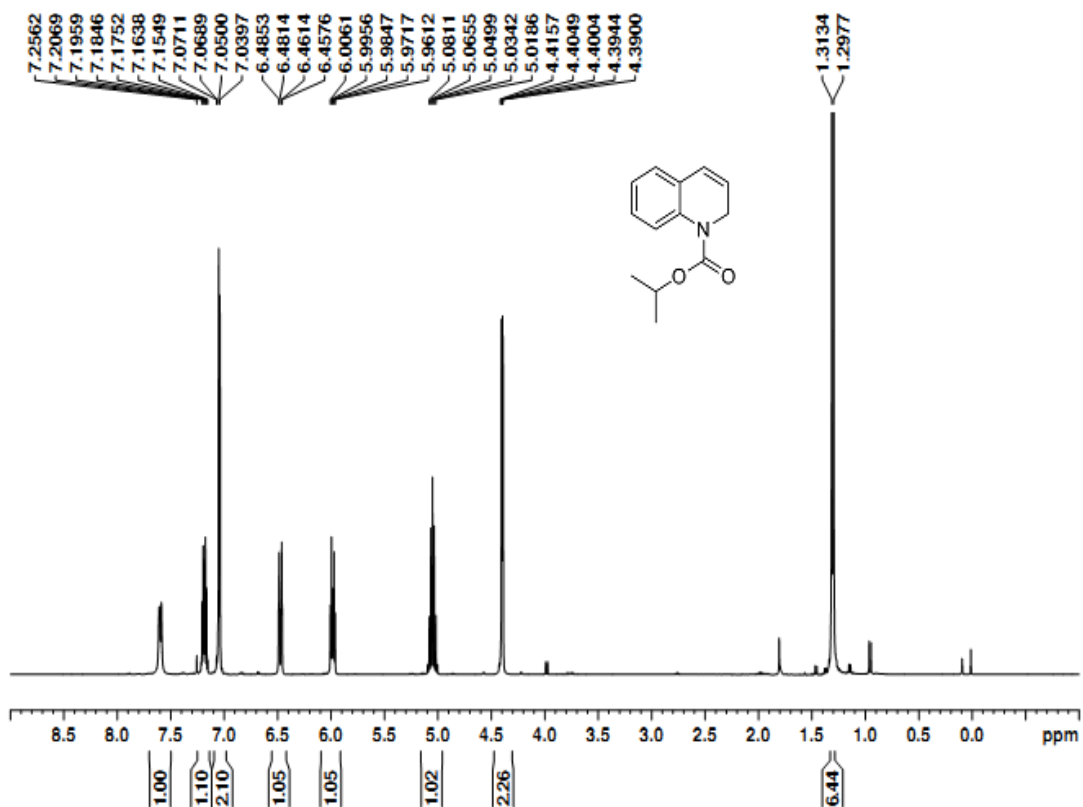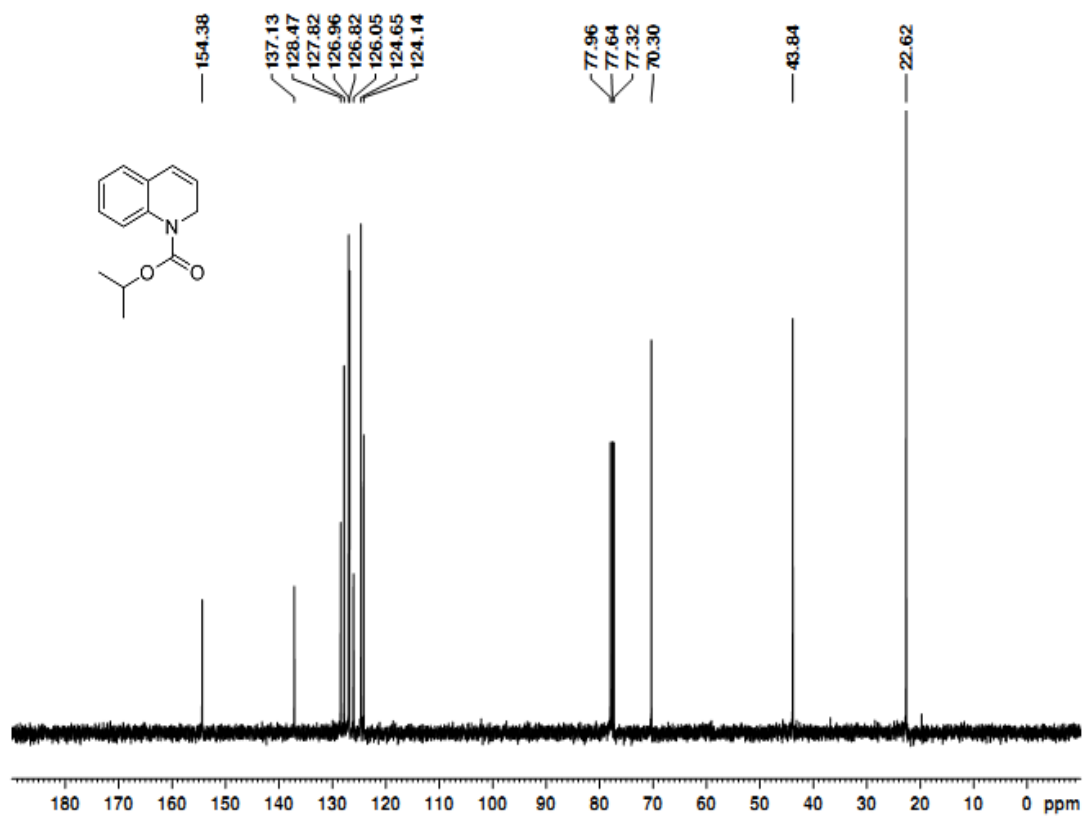

isobutyl quinoline-1(2*H*)-carboxylate (1h)

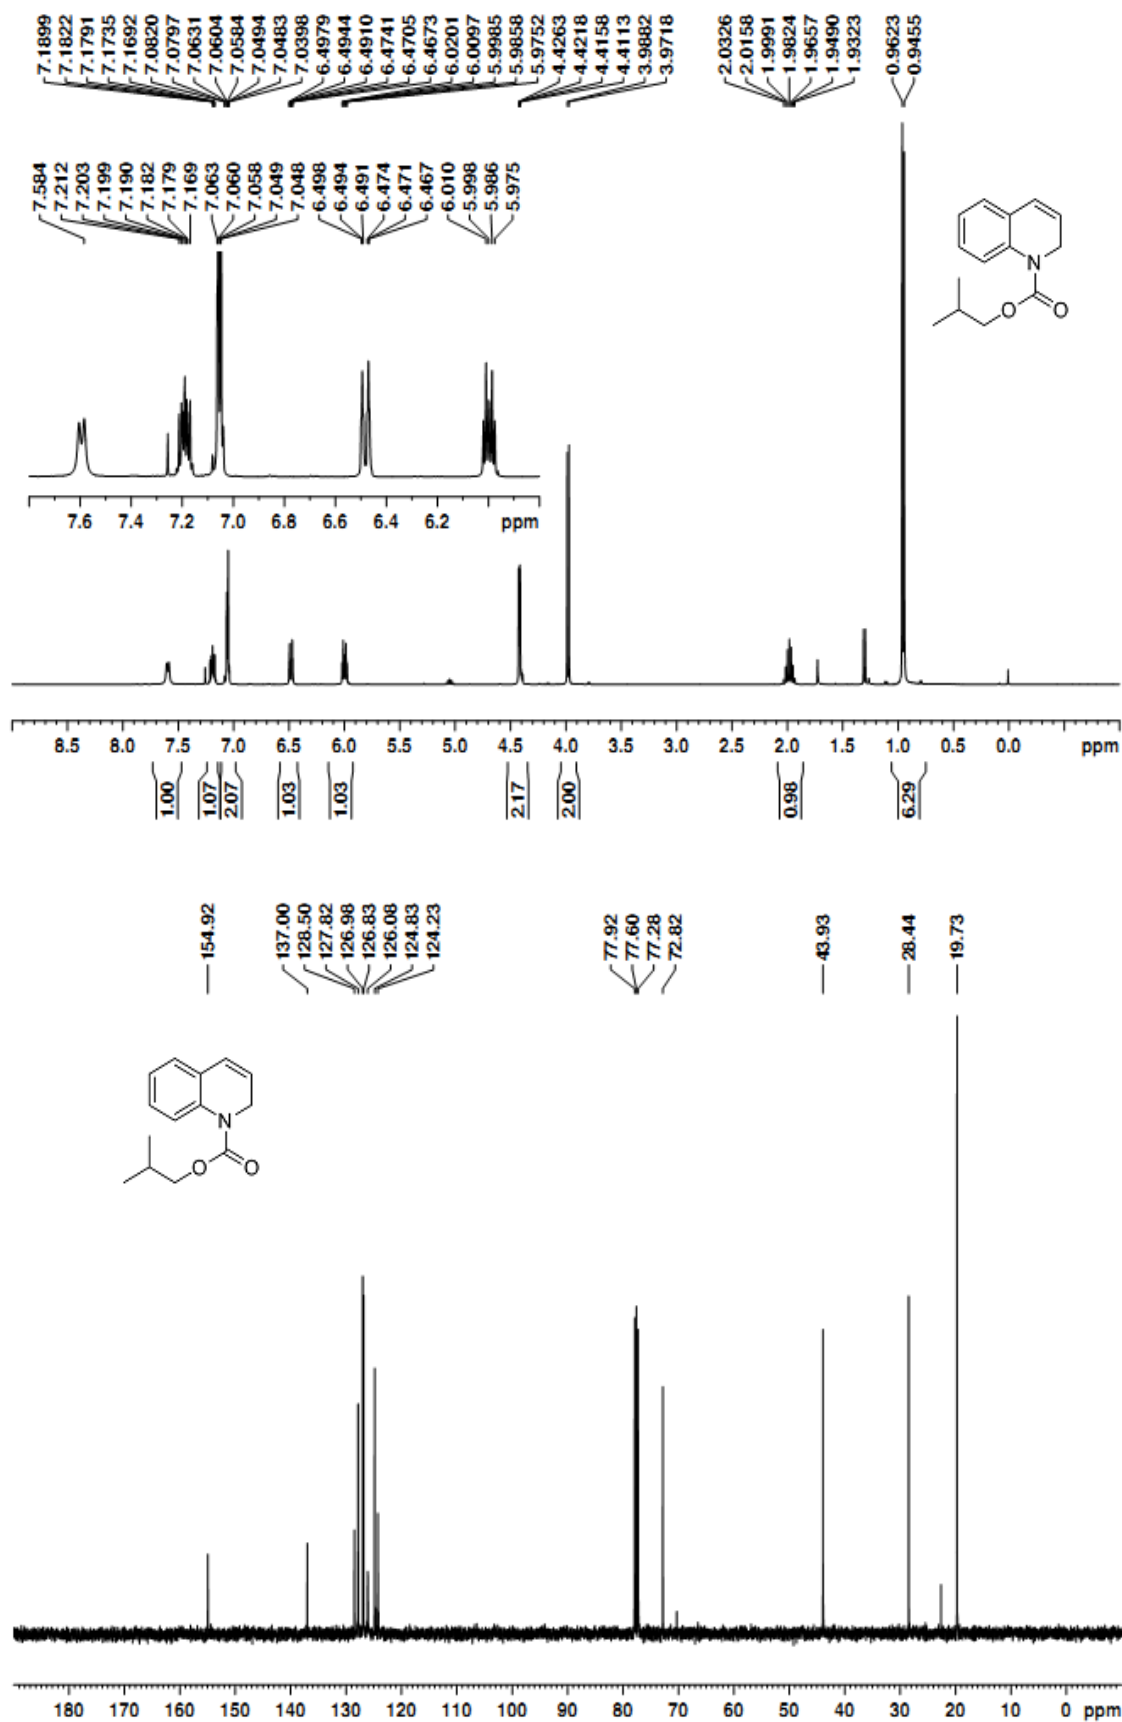

phenyl quinoline-1(2*H*)-carboxylate (1i)

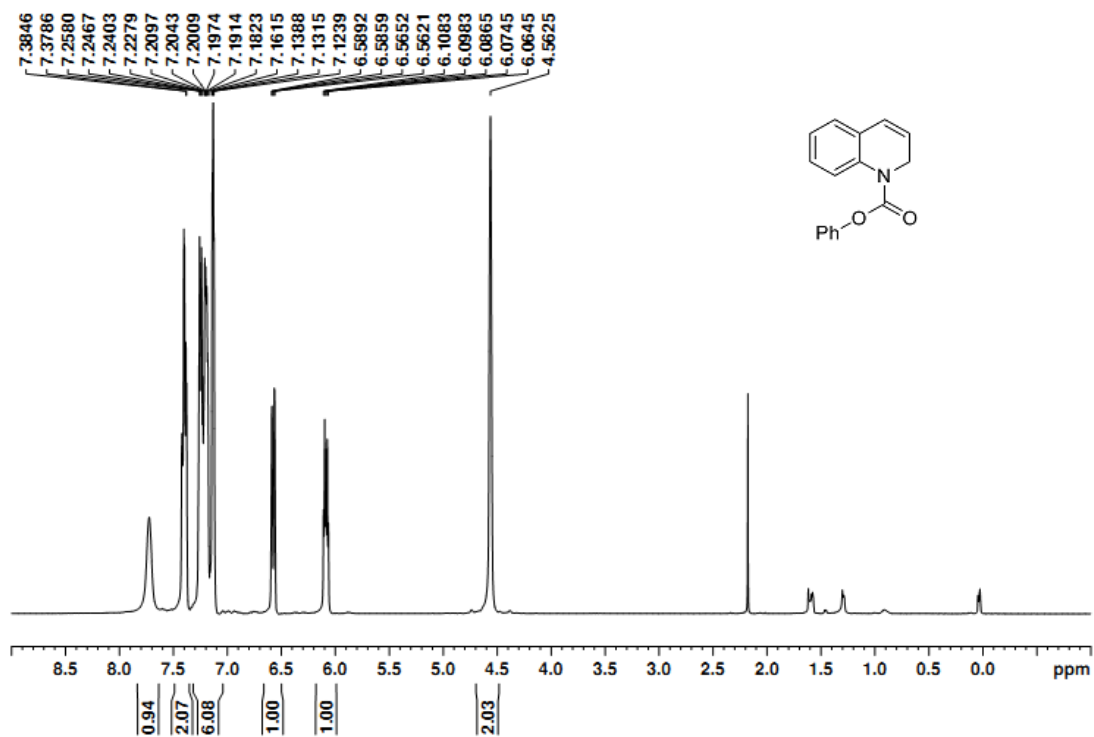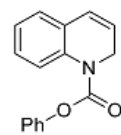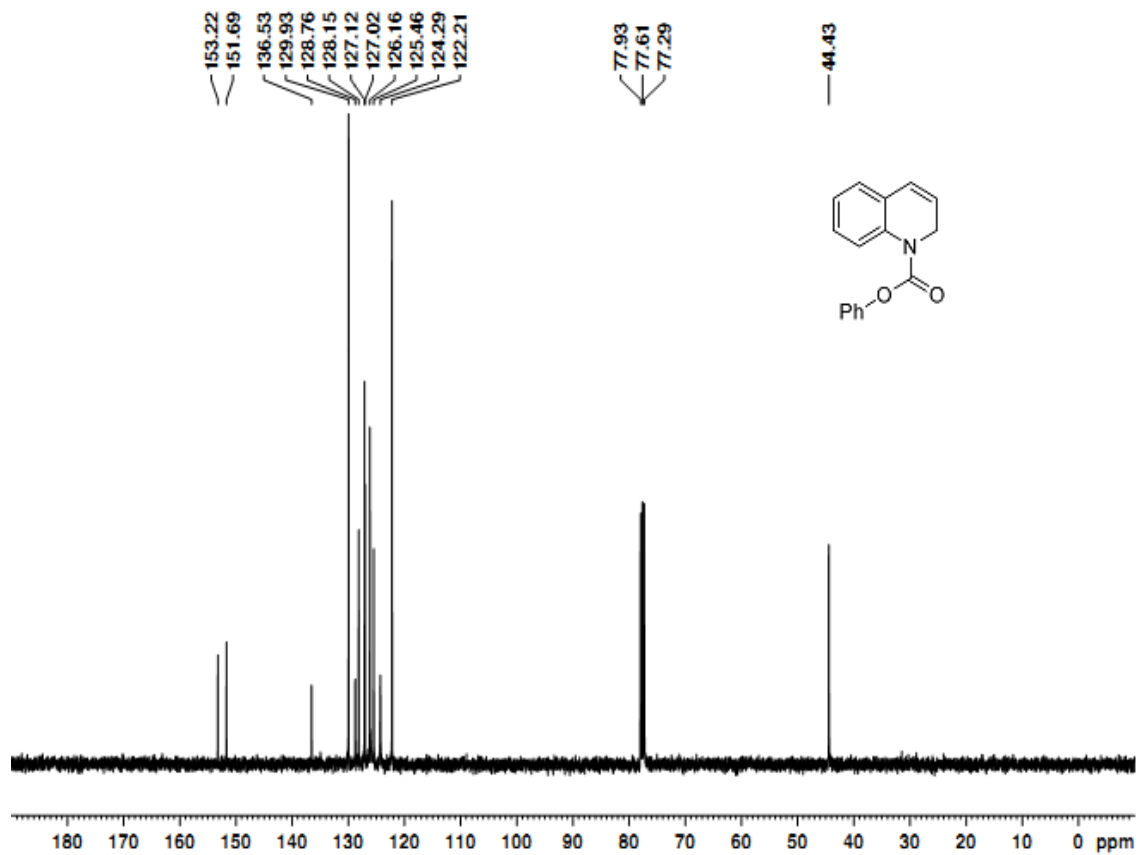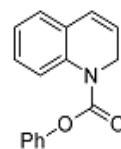

benzyl quinoline-1(2*H*)-carboxylate (1j)

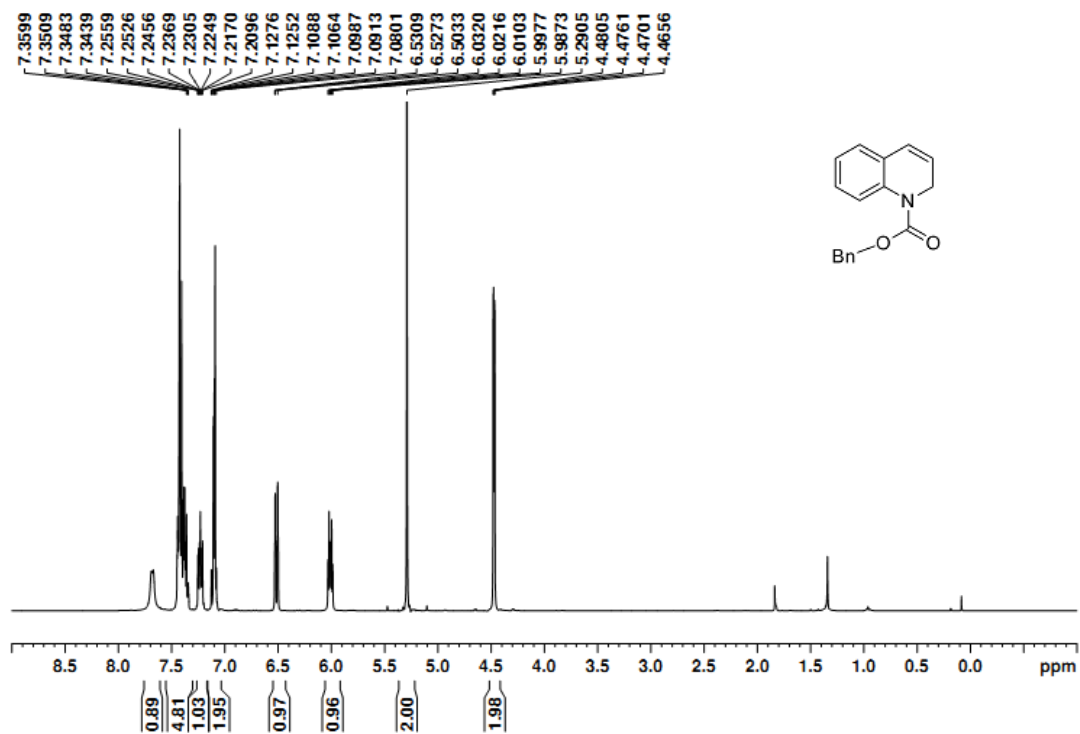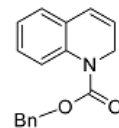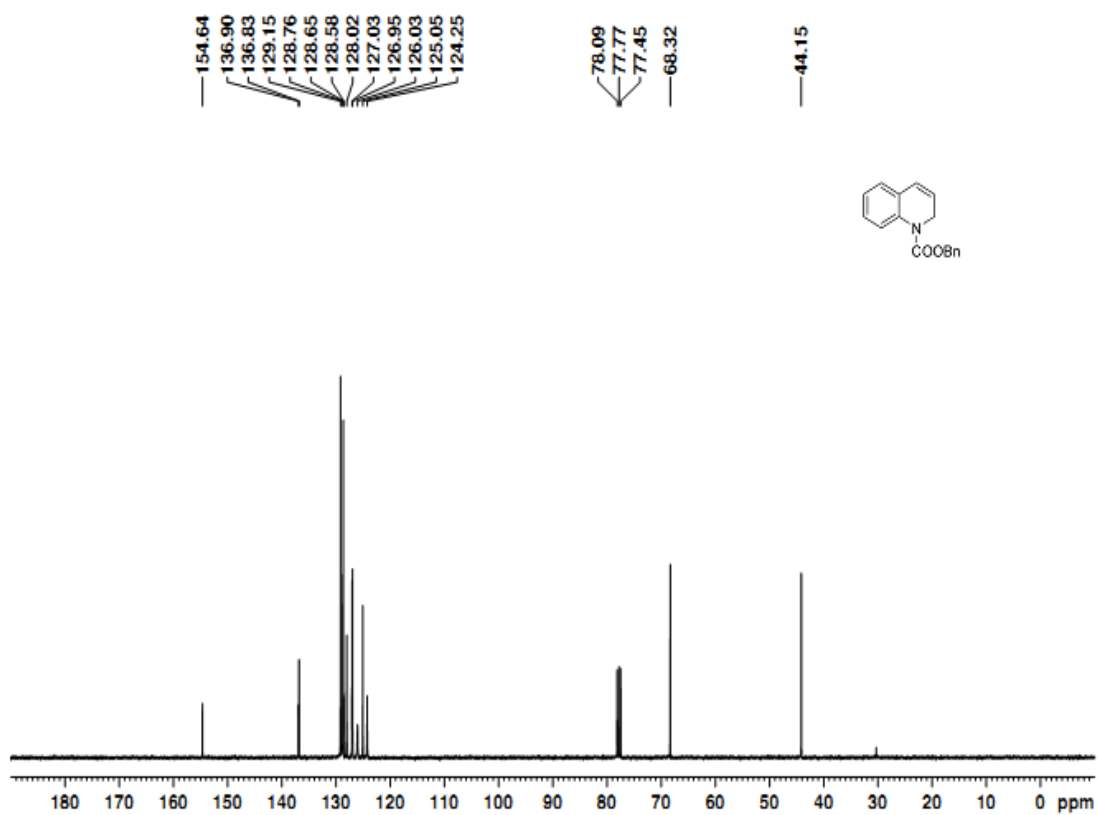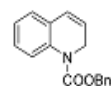

# 1-(quinolin-1(2H)-yl)ethanone (1k)

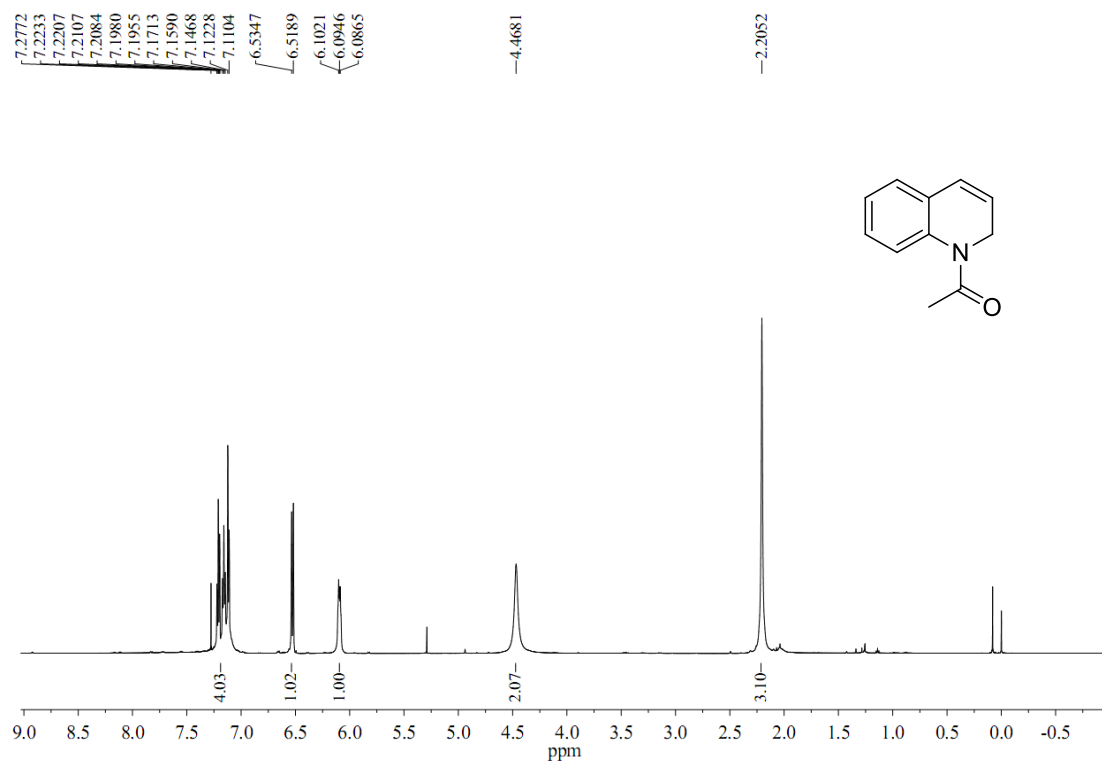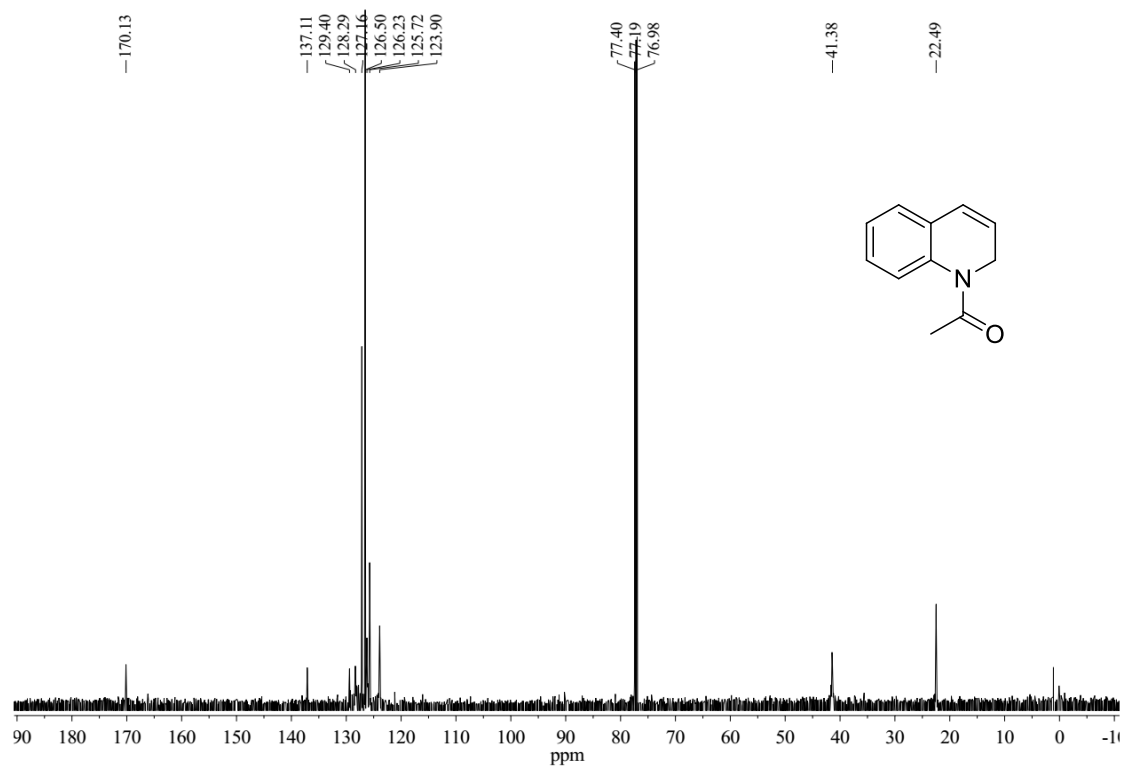



## 2H-chromene (3a)

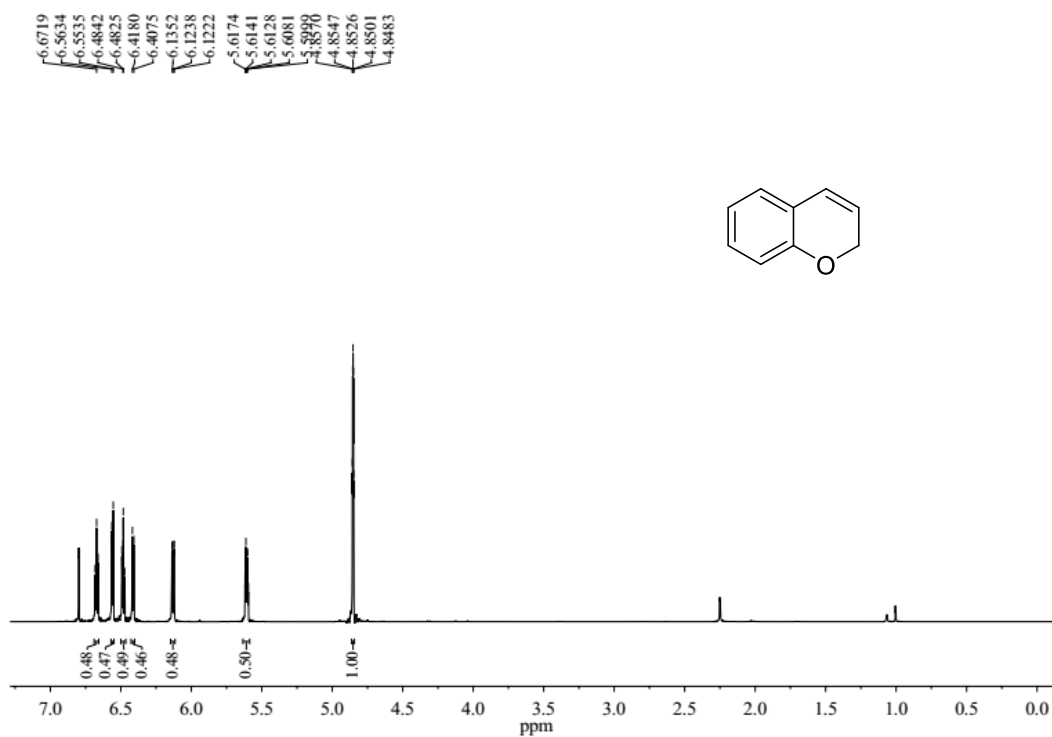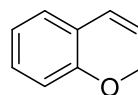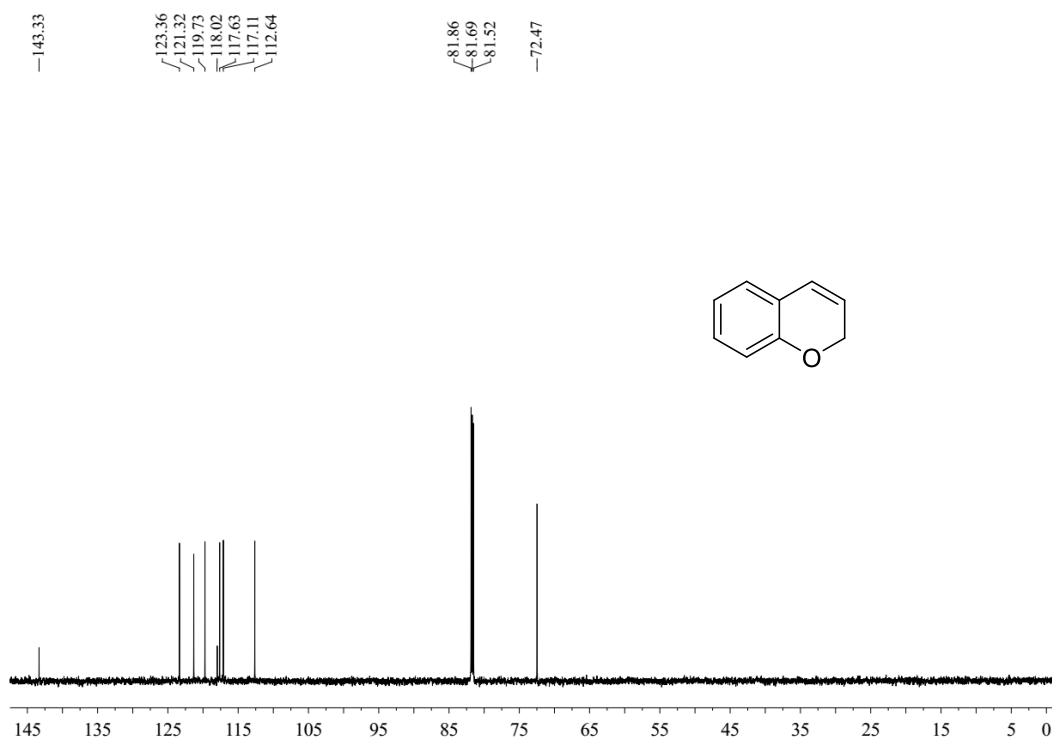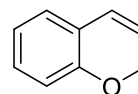

### 8-methyl-2H-chromene (3b)

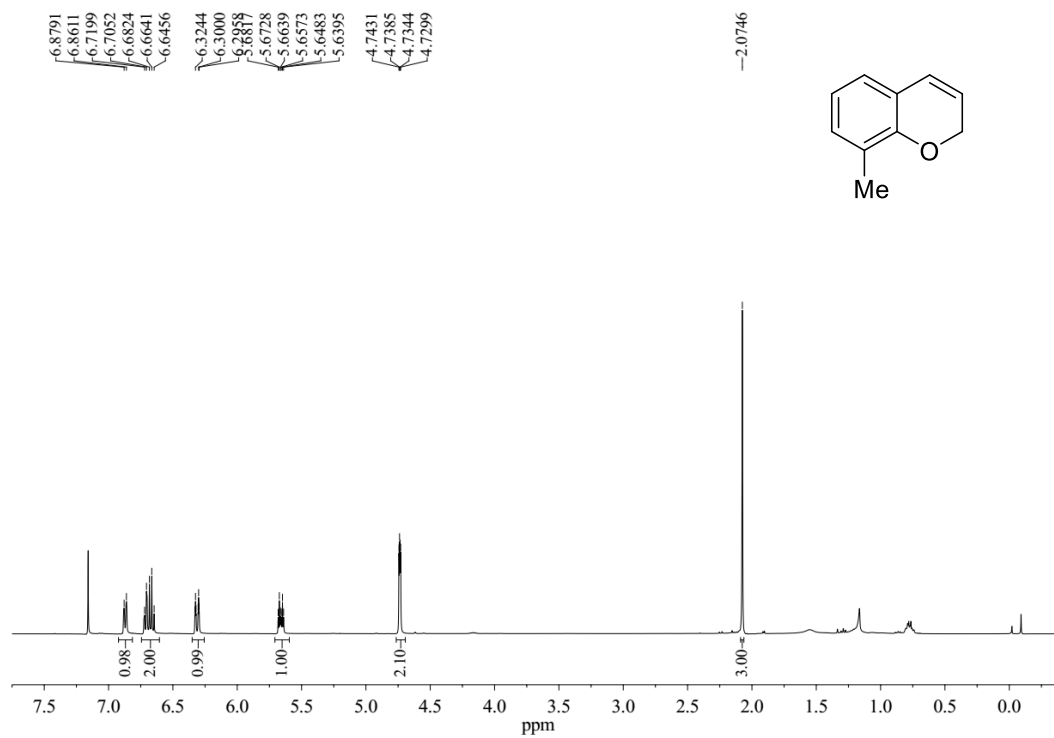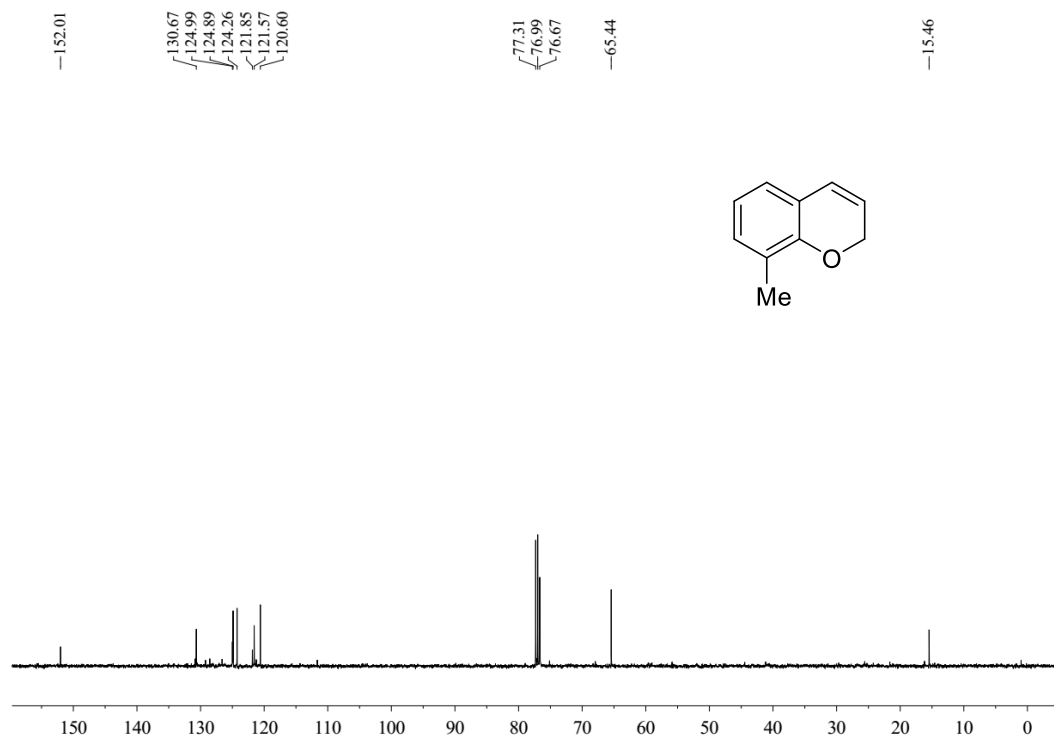

### 8-isopropyl-2H-chromene (3c)

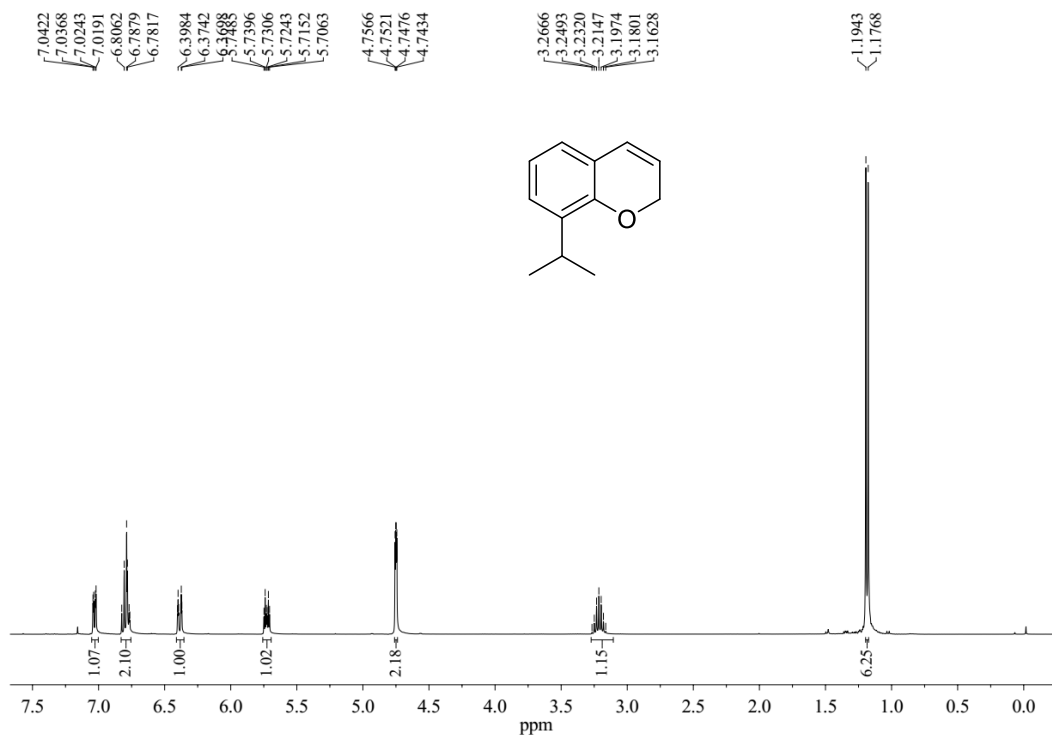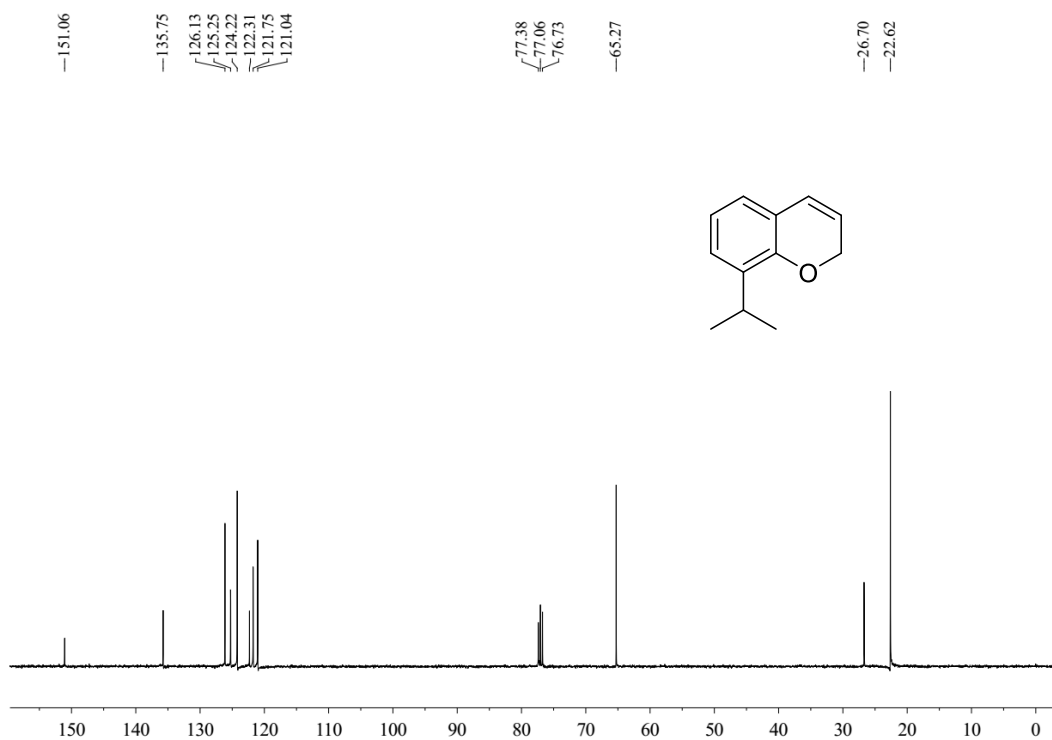

### 8-(tert-butyl)-2H-chromene (3d)

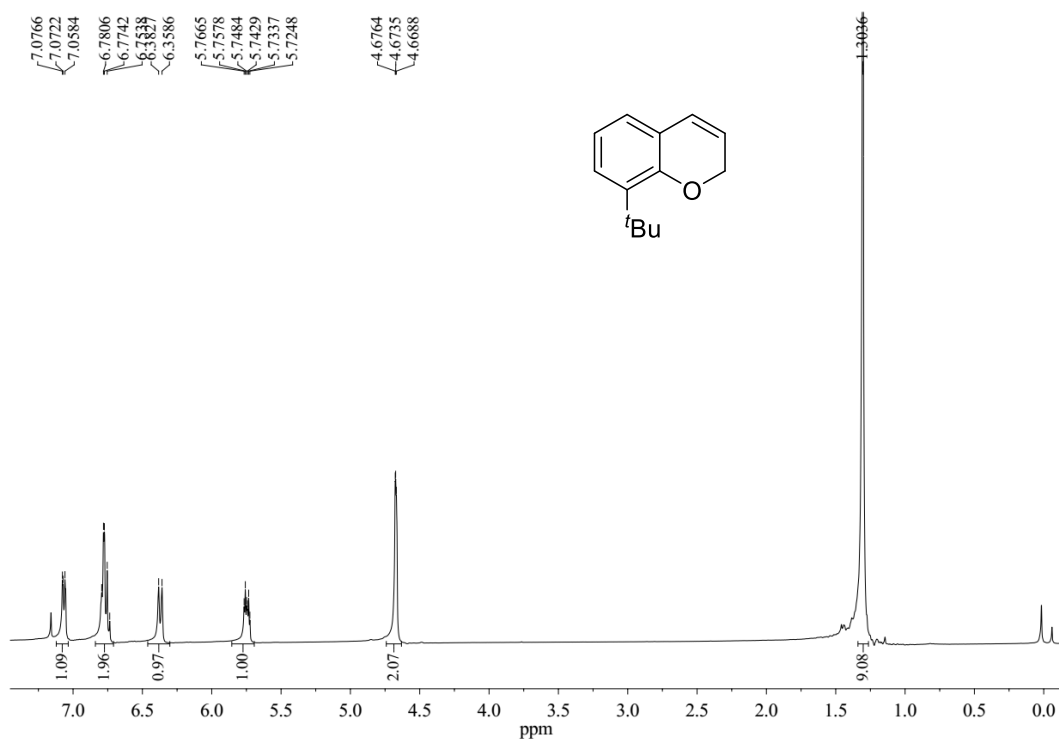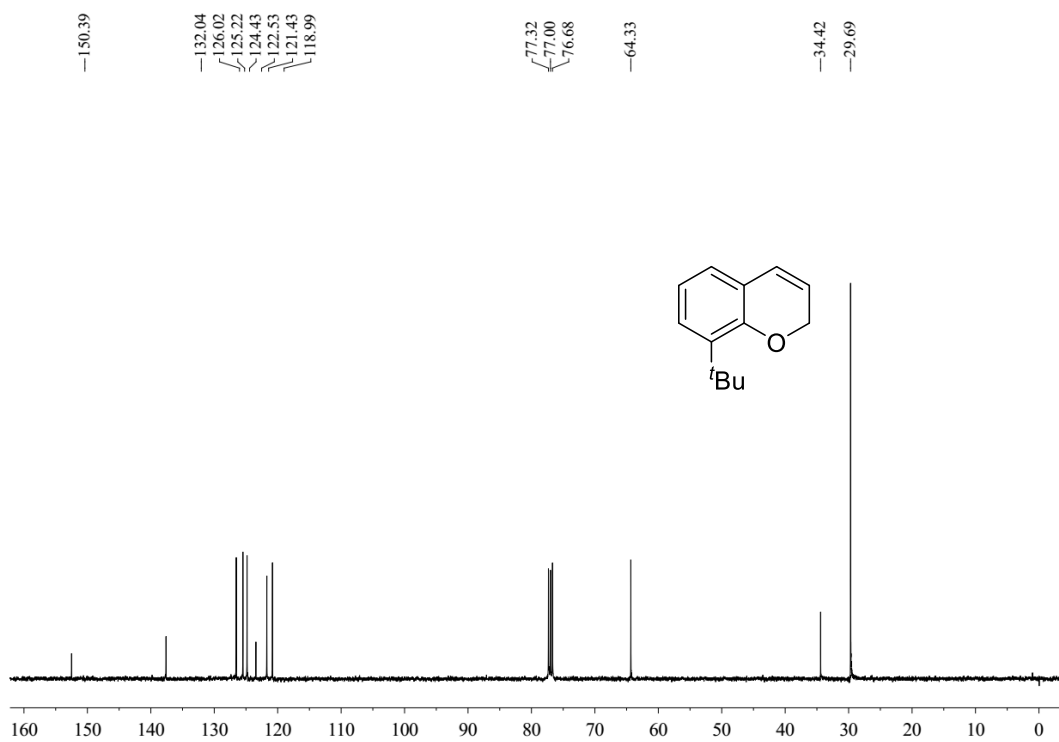

### 8-methoxy-2H-chromene (3e)

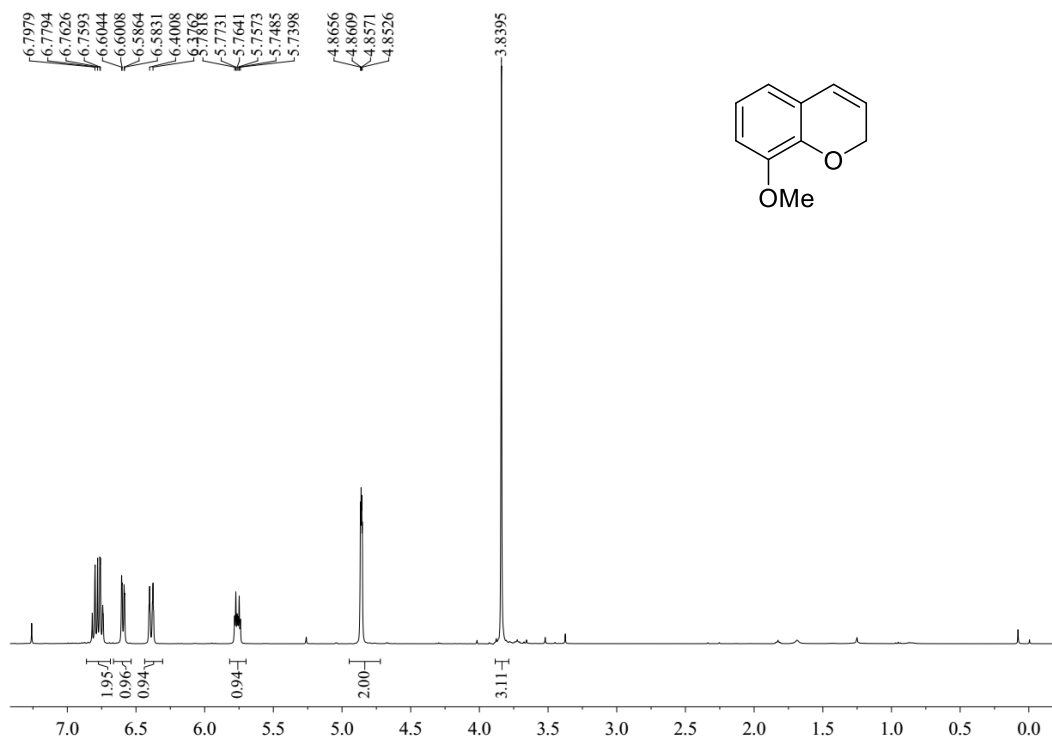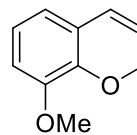

147.63, 142.71, 124.45, 122.96, 121.96, 120.84, 118.93, 112.04, 77.42, 77.09, 76.77, 65.70, 55.91

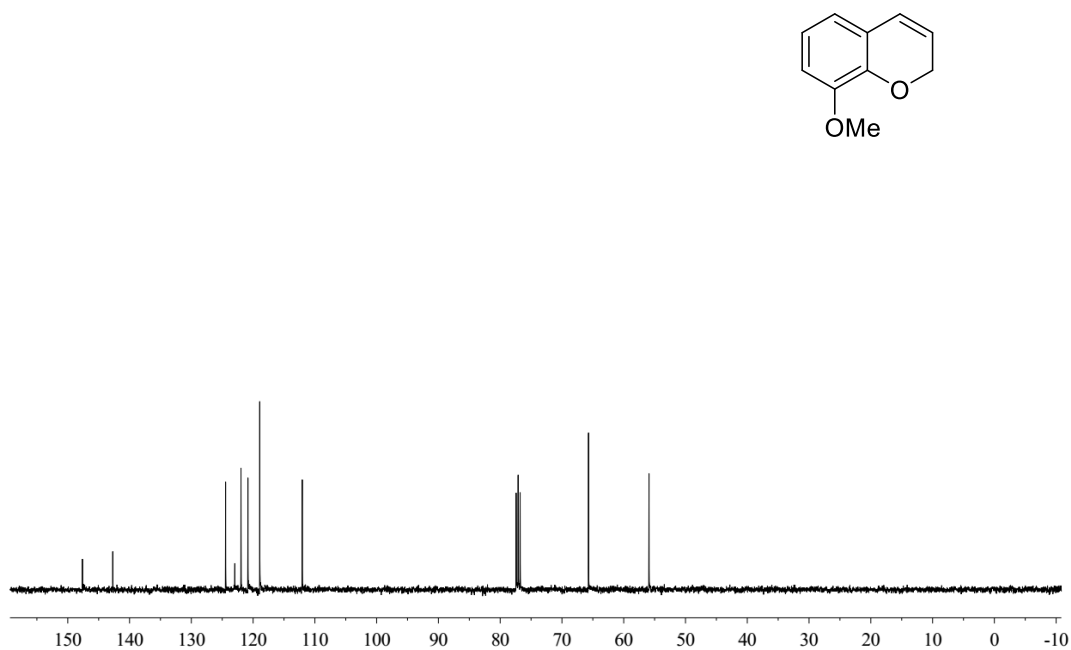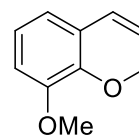

### 8-phenyl-2H-chromene (3f)

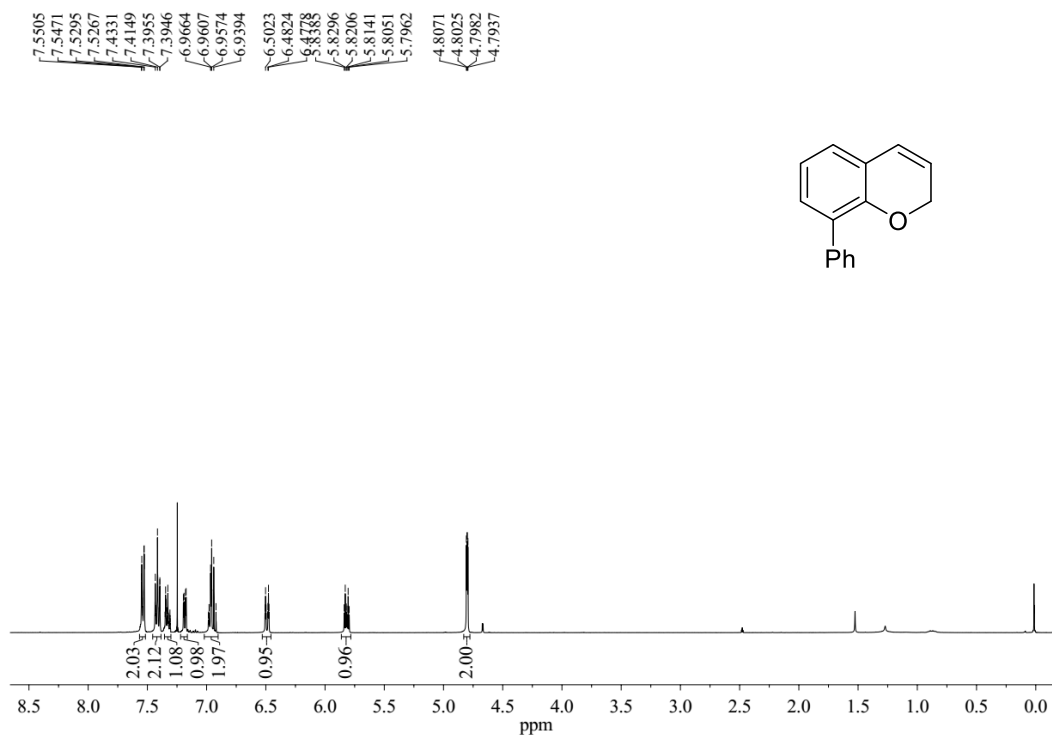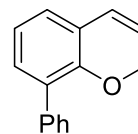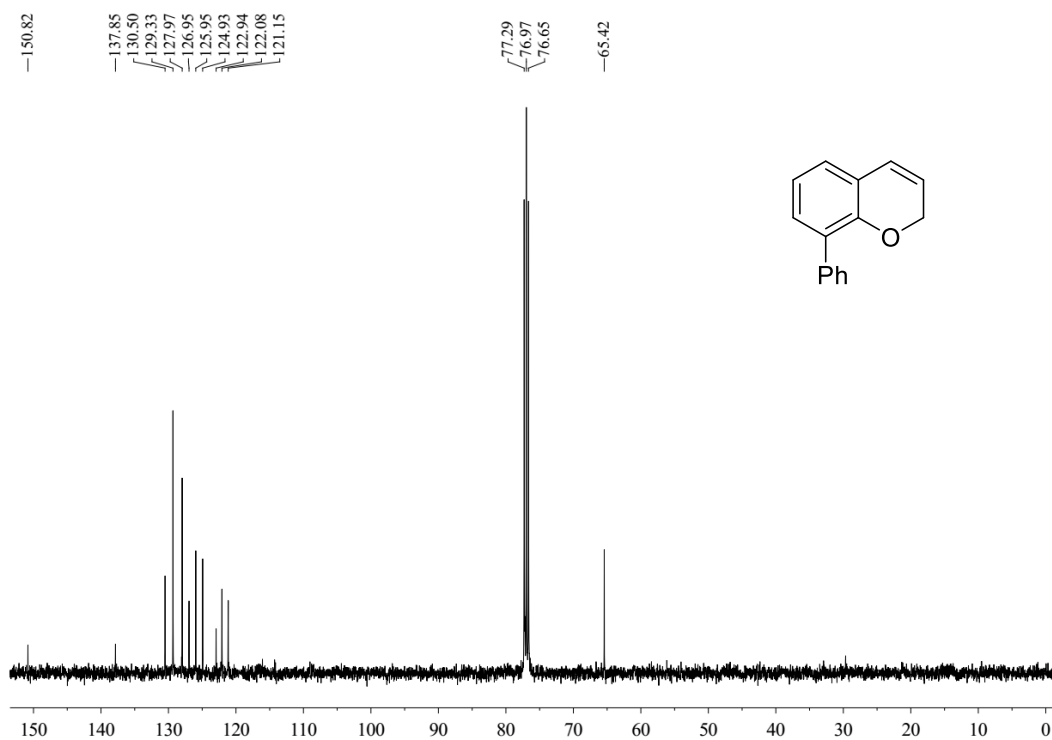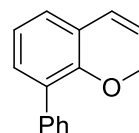

### 8-chloro-2H-chromene (3g)

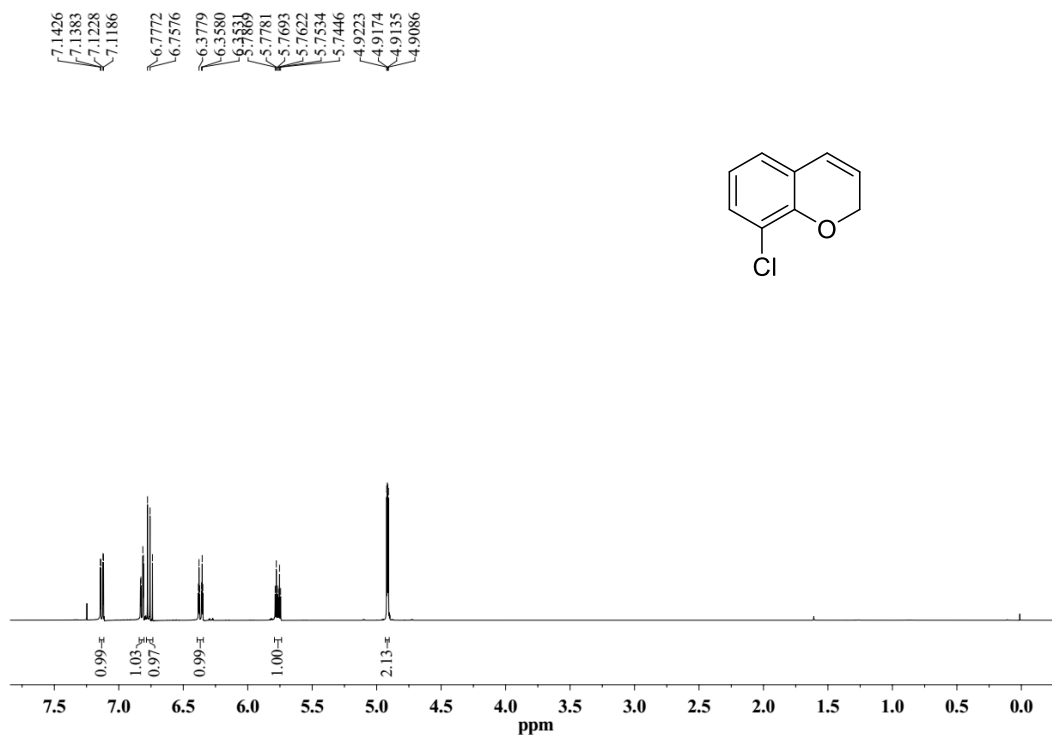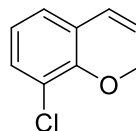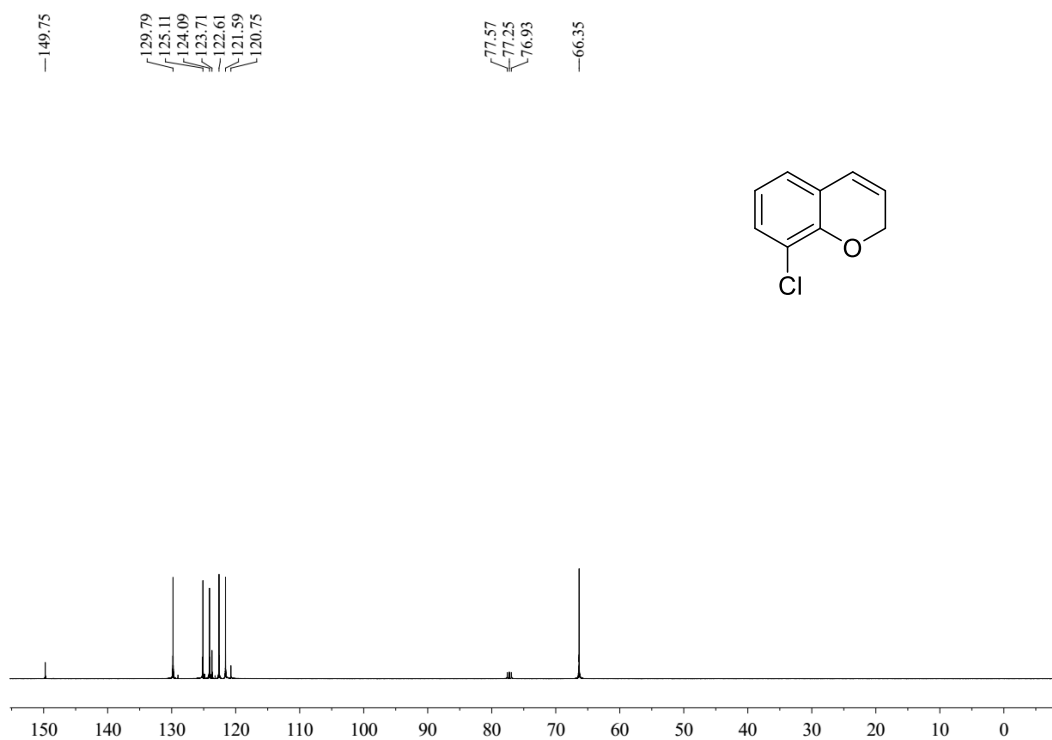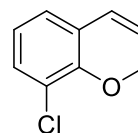

### 6-bromo-2H-chromene (3h)

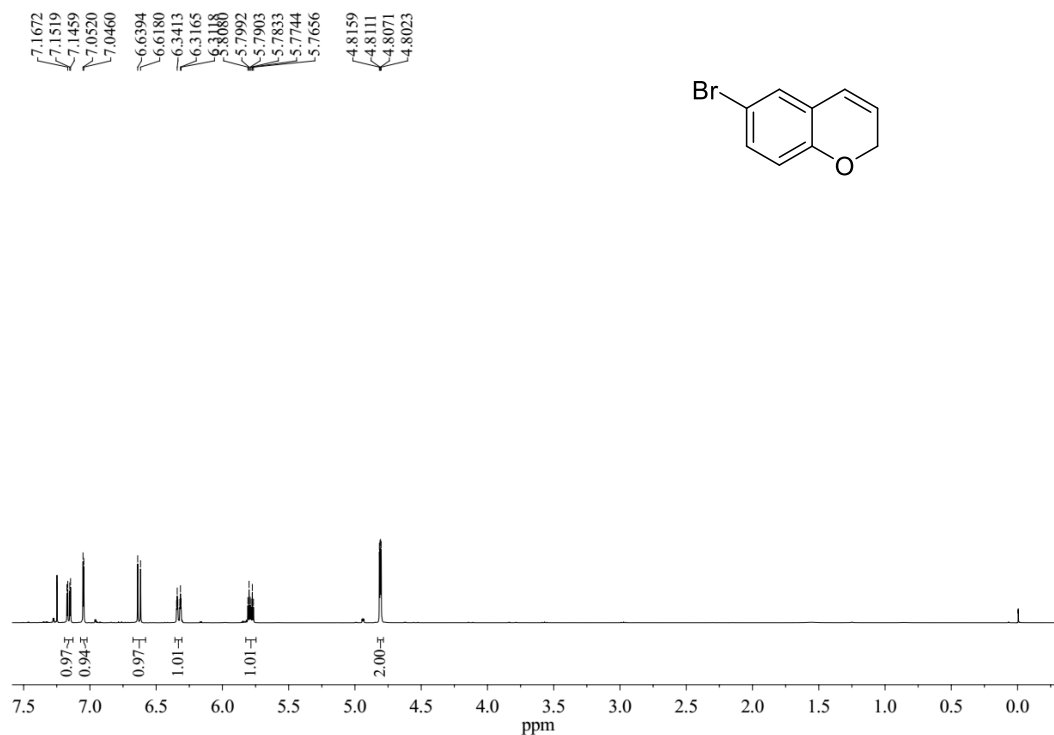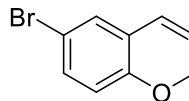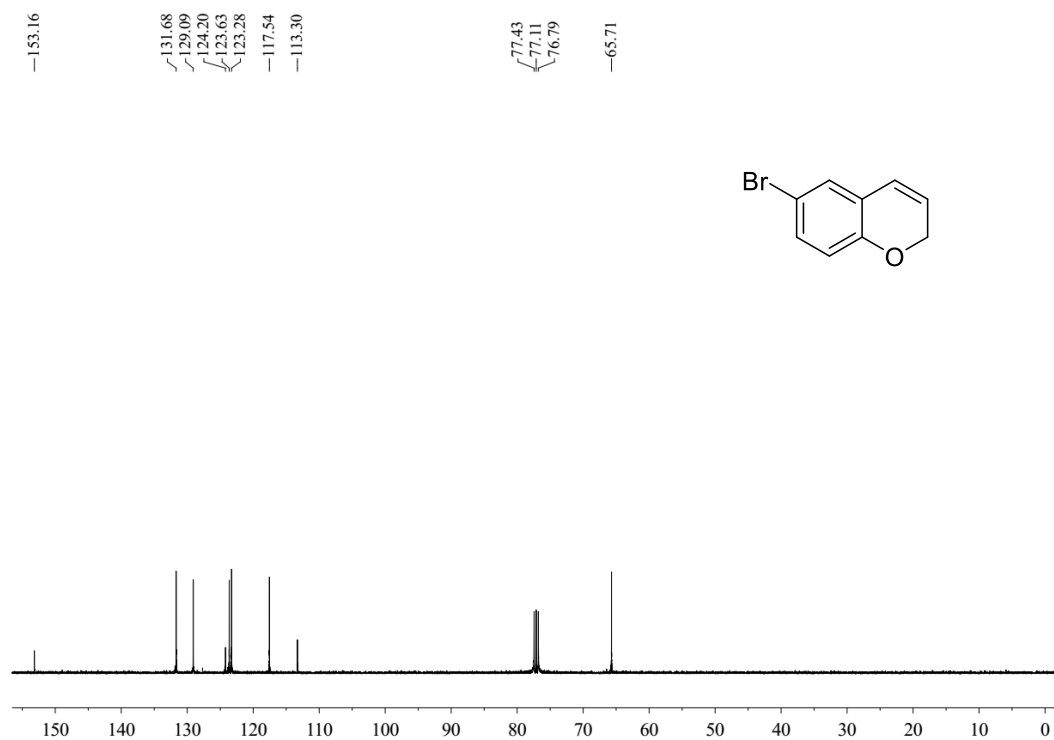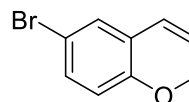



### 7-bromo-2H-chromene (3i)

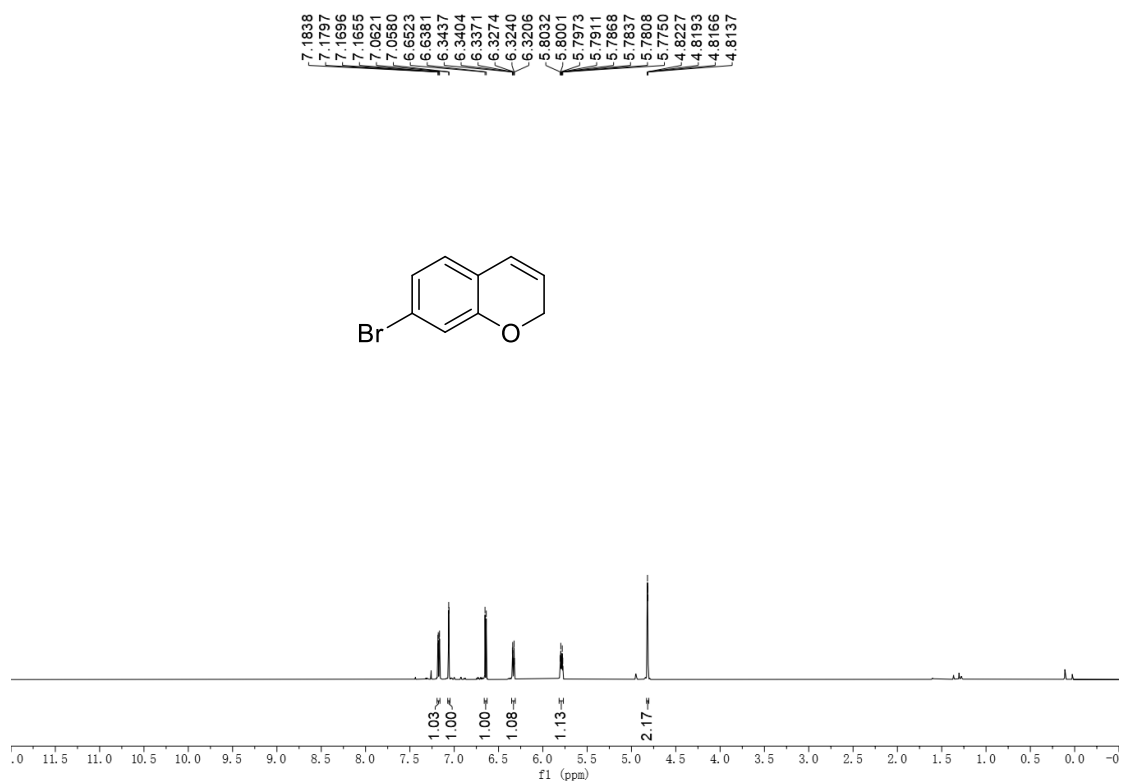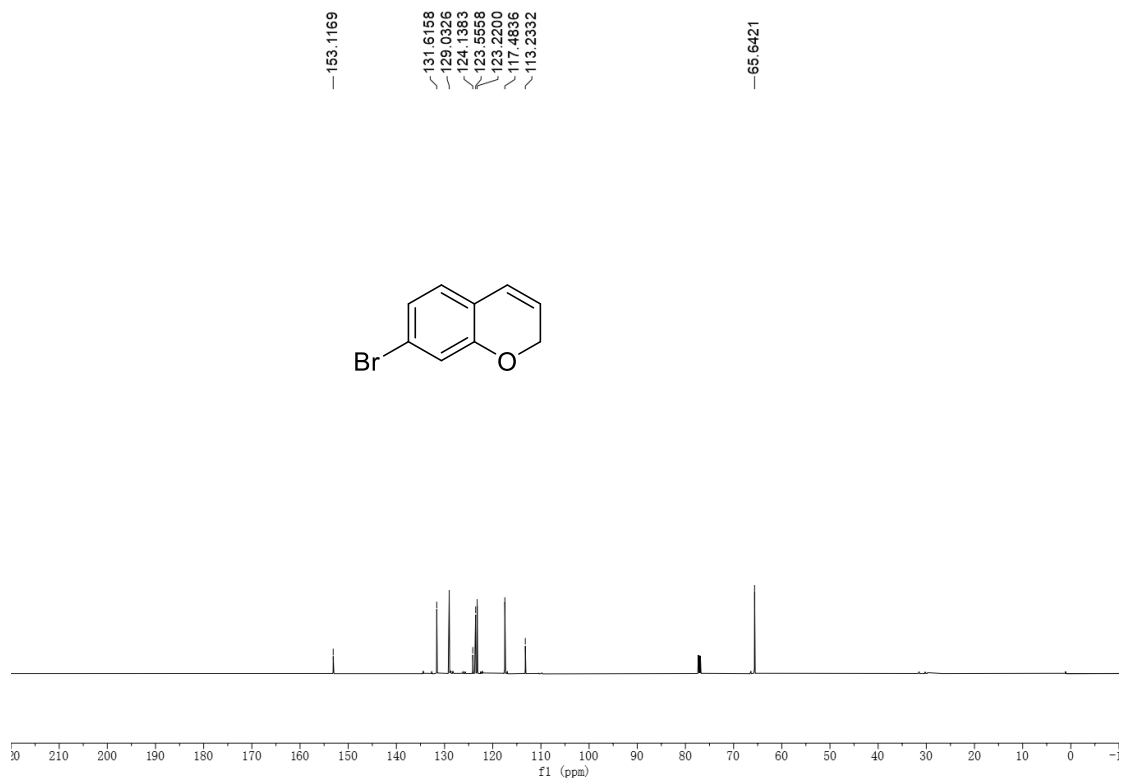

### 6, 8-dimethyl-2H-chromene (3j)

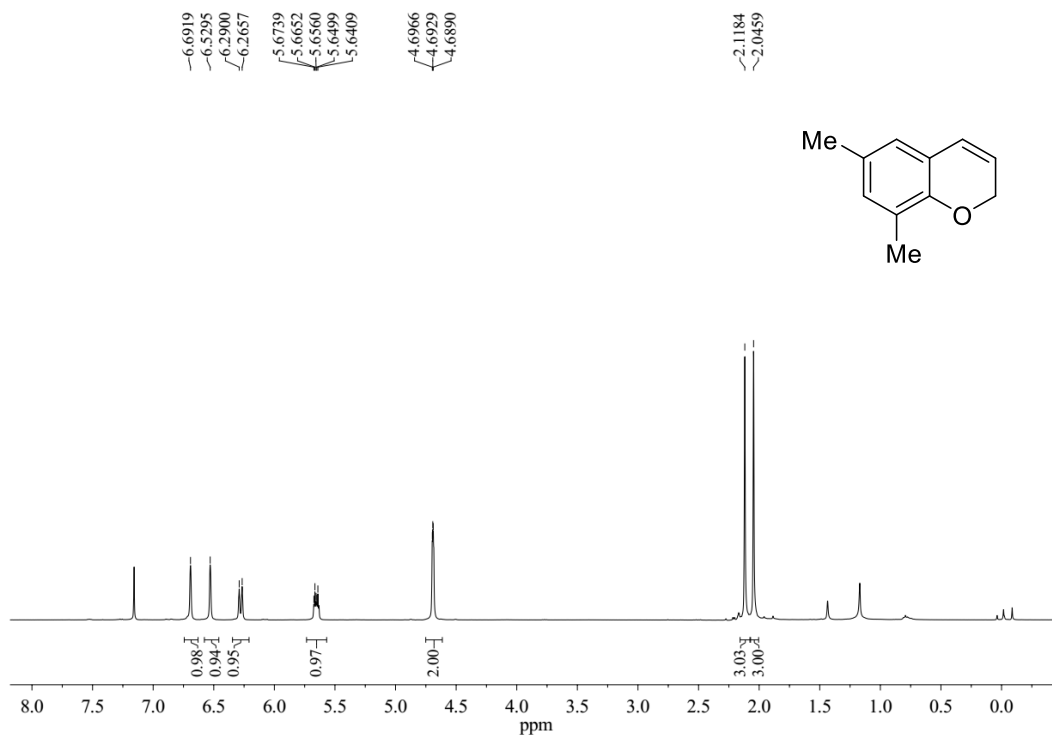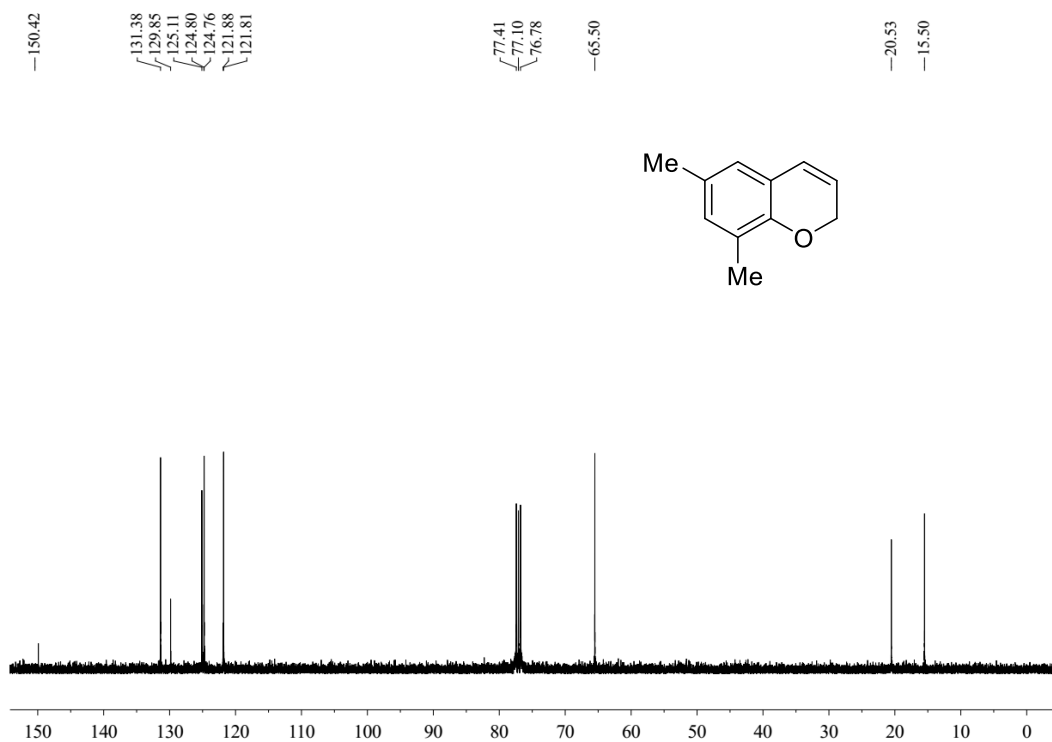

### 5, 8-dimethyl-2H-chromene (3k)

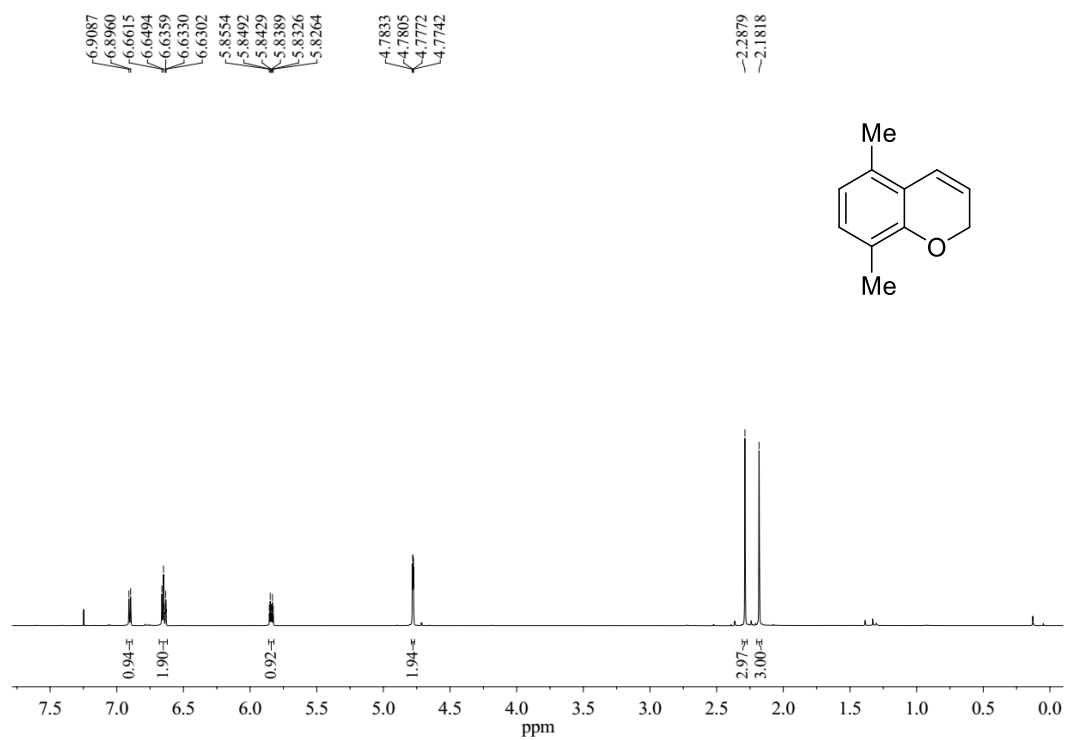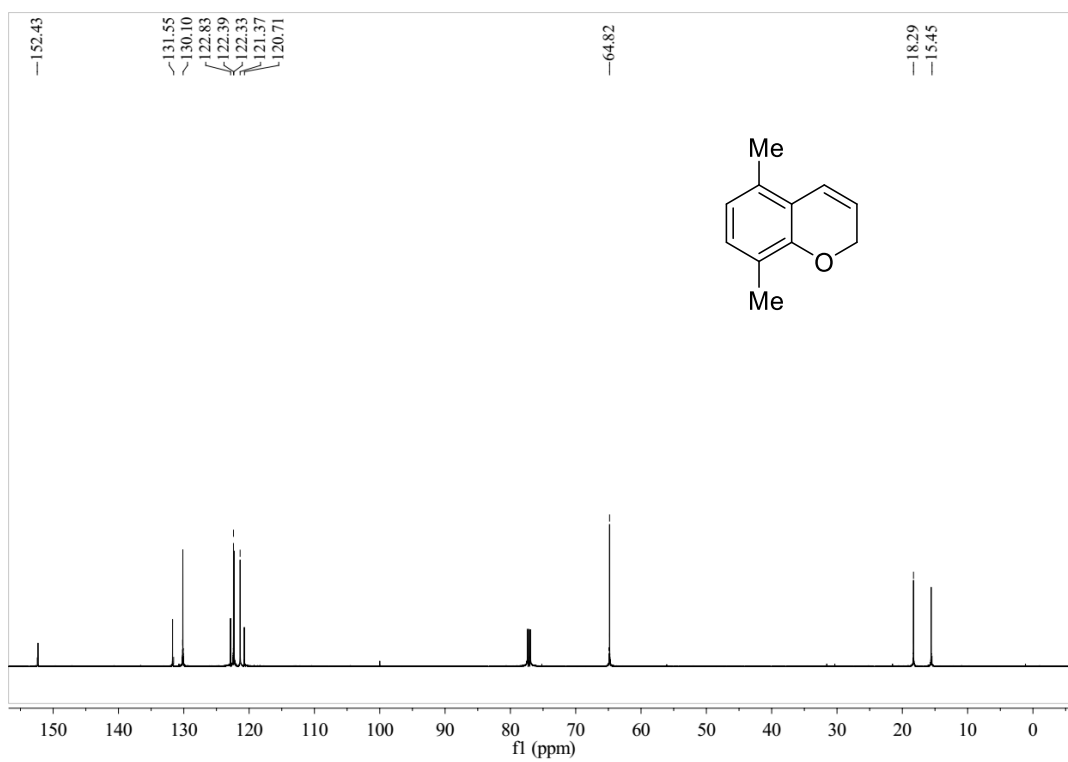

### 6-methyl-2H-thiochromene (3l)

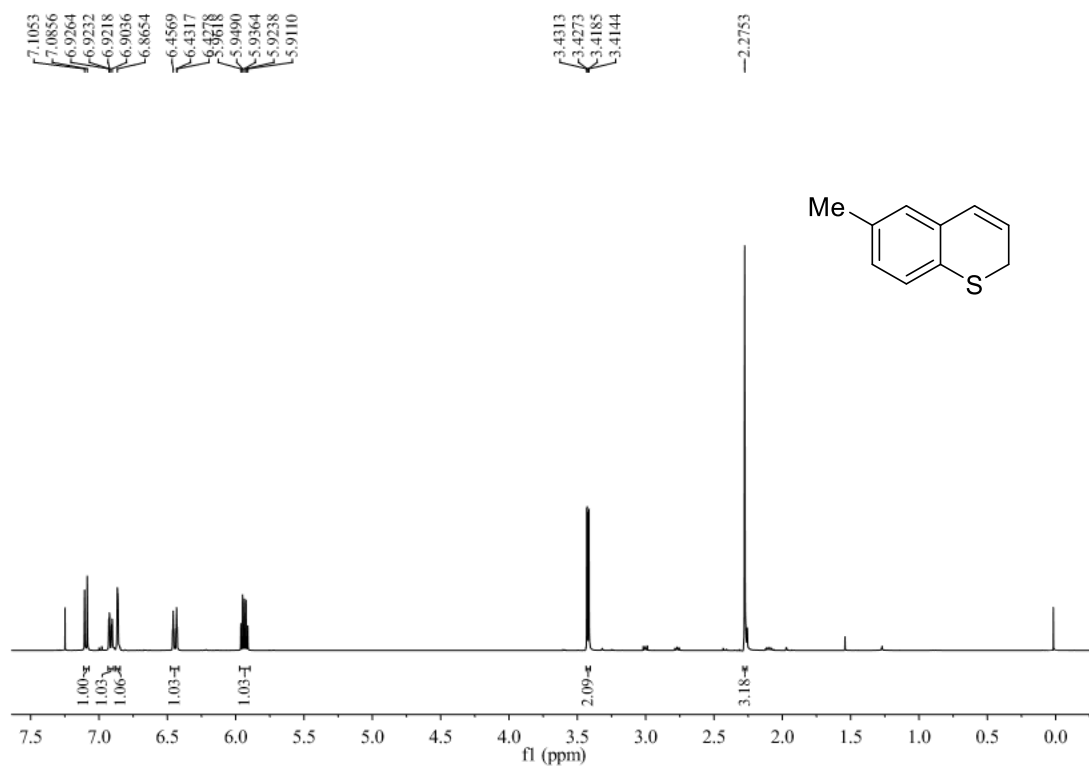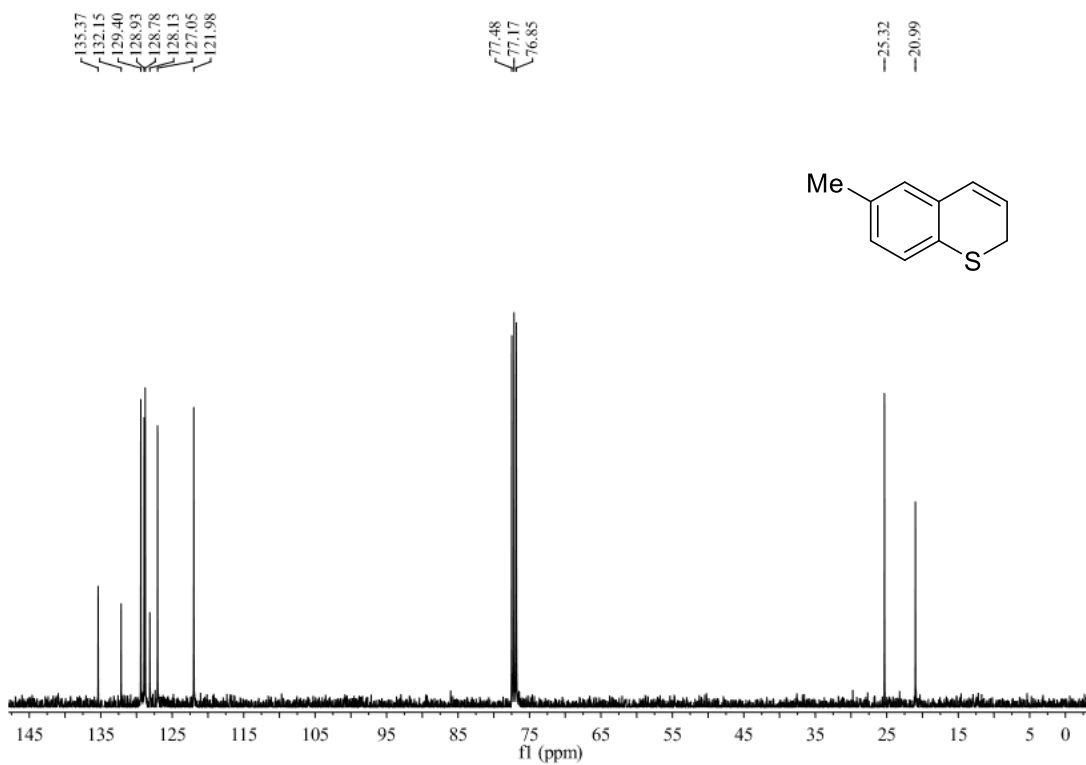

**methyl 4-methyl-3-(4,4,5,5-tetramethyl-1,3,2-dioxaborolan-2-yl)-3,4-dihydroquinoline-1(2H)-carboxylate (2a)**

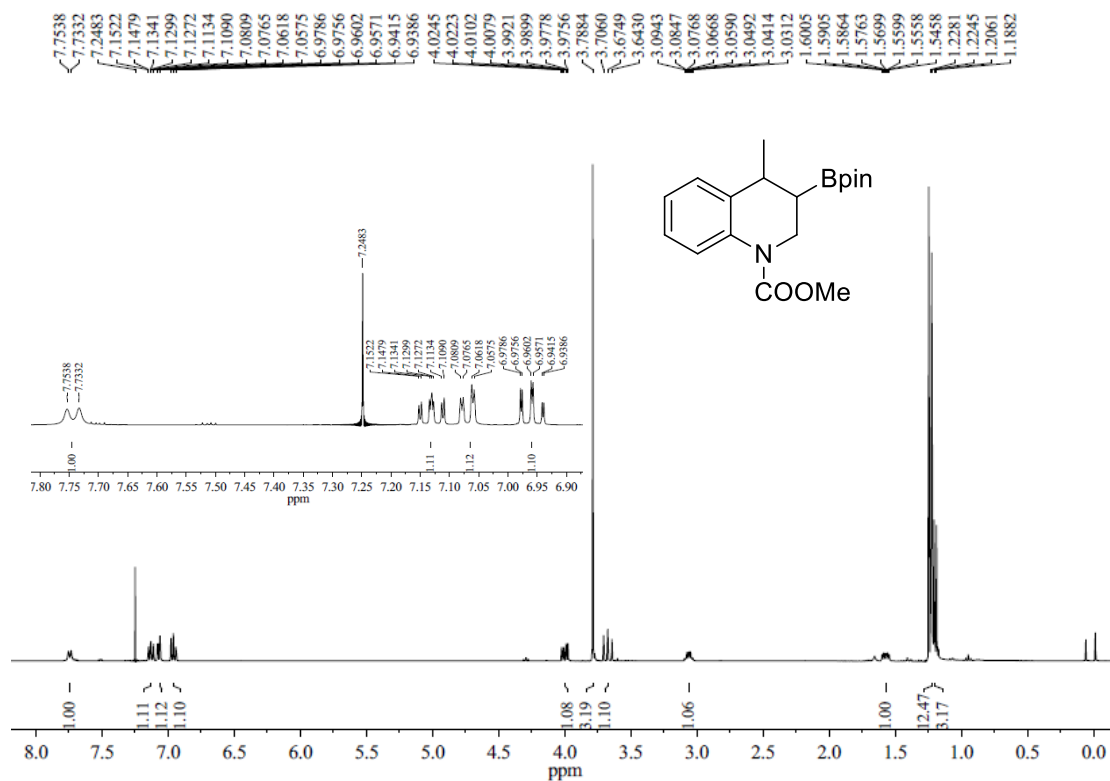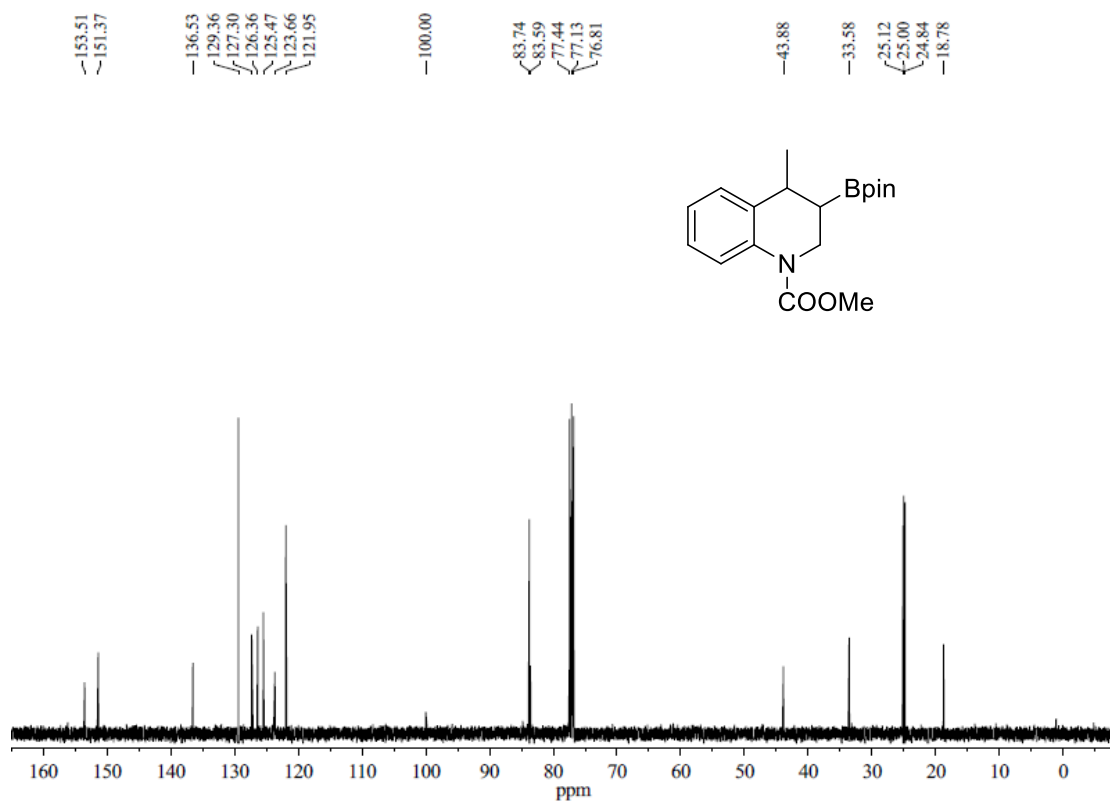

**Methyl 4,6-dimethyl-3-(4,4,5,5-tetramethyl-1,3,2-dioxaborolan-2-yl)-3,4-dihydroquinoline-**

**1(2*H*)-carboxylate (2b)**

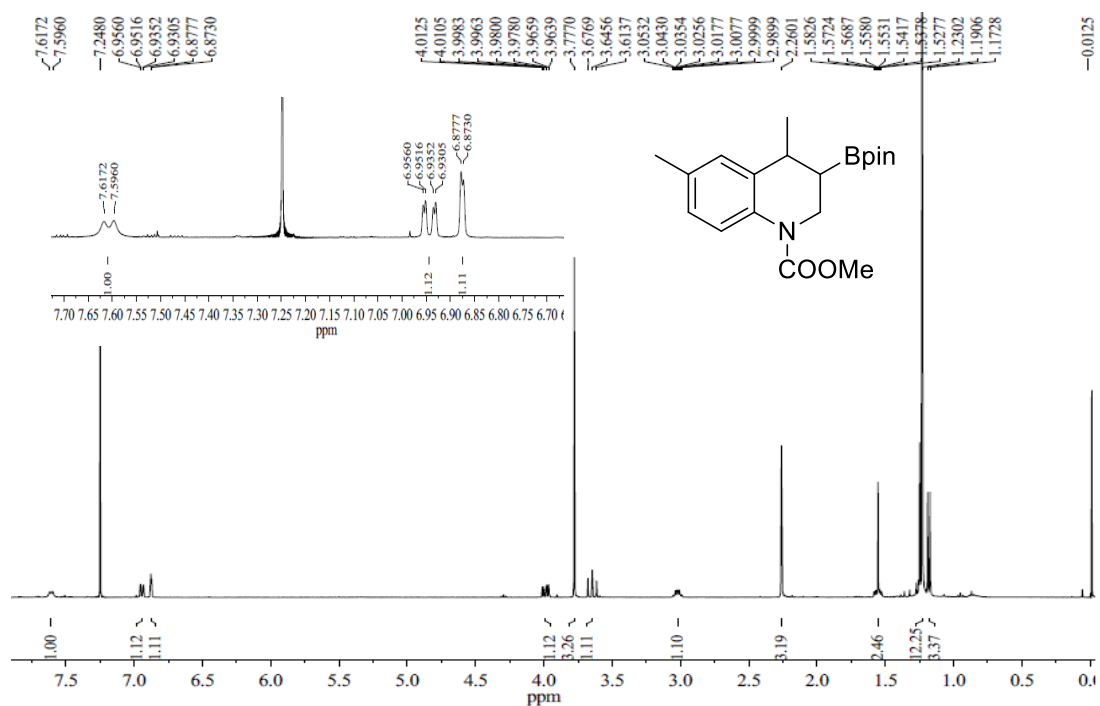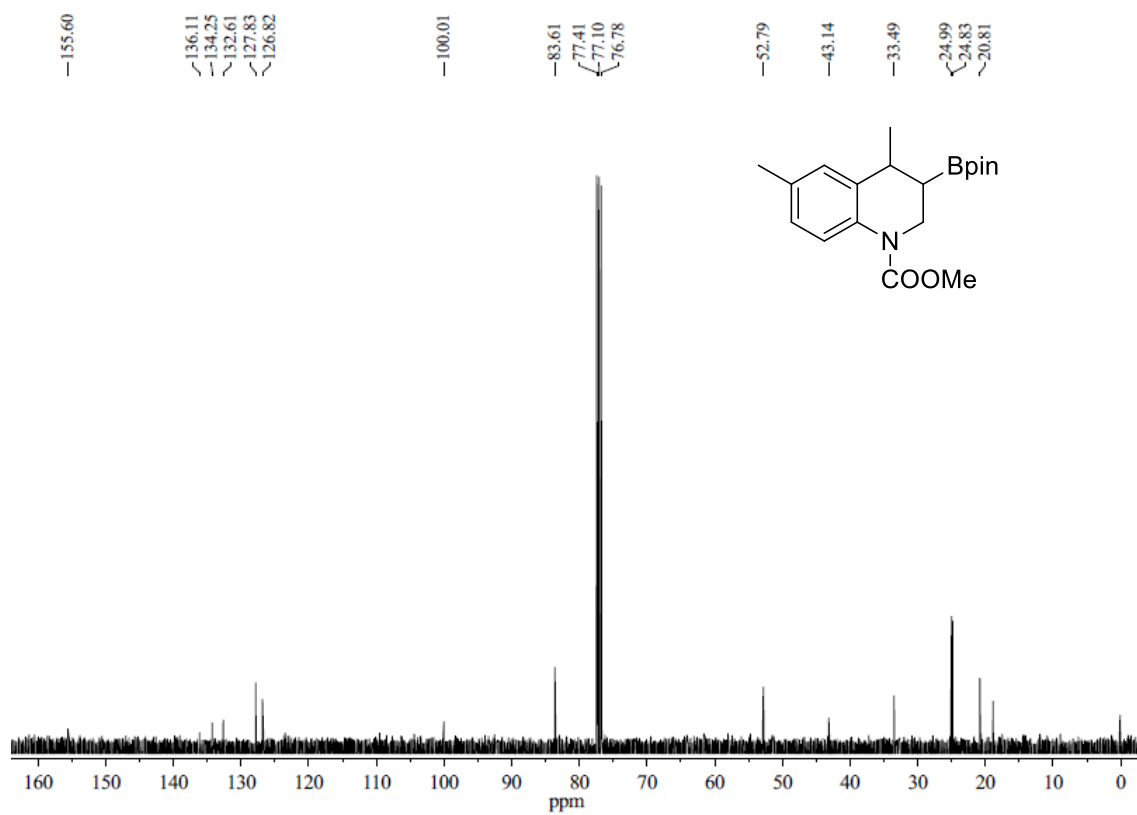

**Methyl 4,7-dimethyl-3-(4,4,5,5-tetramethyl-1,3,2-dioxaborolan-2-yl)-3,4-dihydroquinoline-1(2H)-carboxylate (2c)**

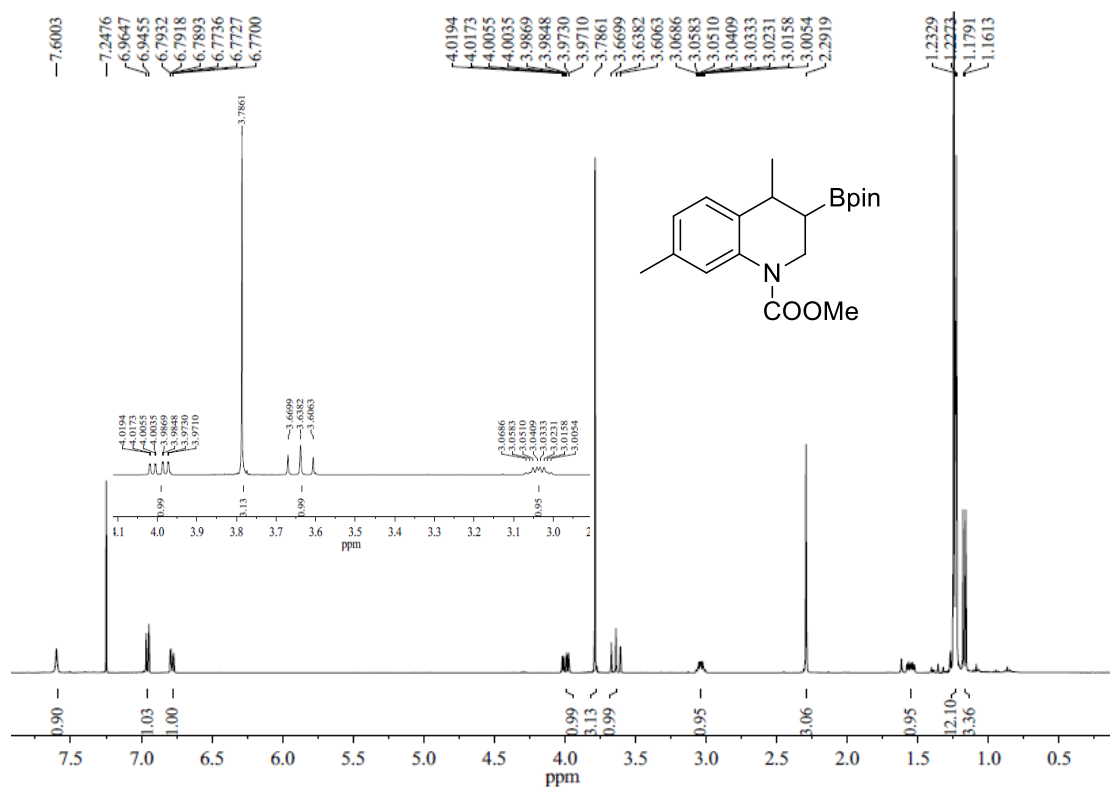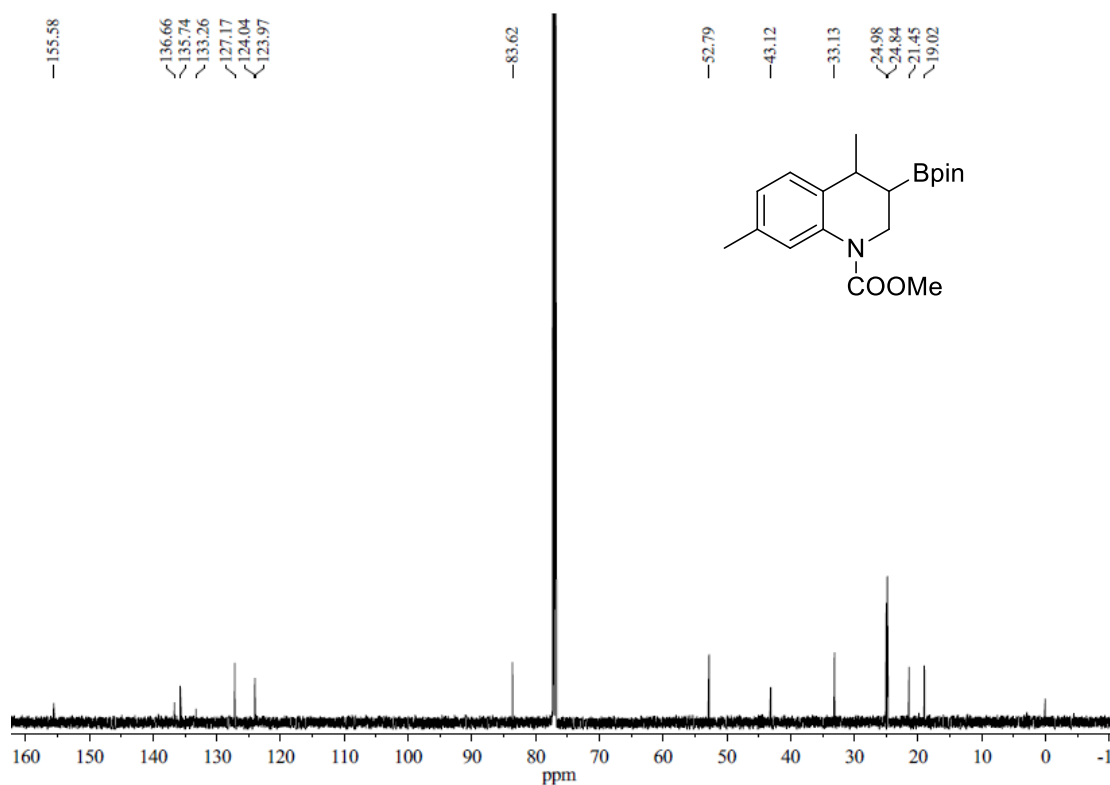

**Methyl 6-methoxy-4-methyl-3-(4,4,5,5-tetramethyl-1,3,2-dioxaborolan-2-yl)-3,4-dihydroquinoline-1(2H)-carboxylate (2d)**

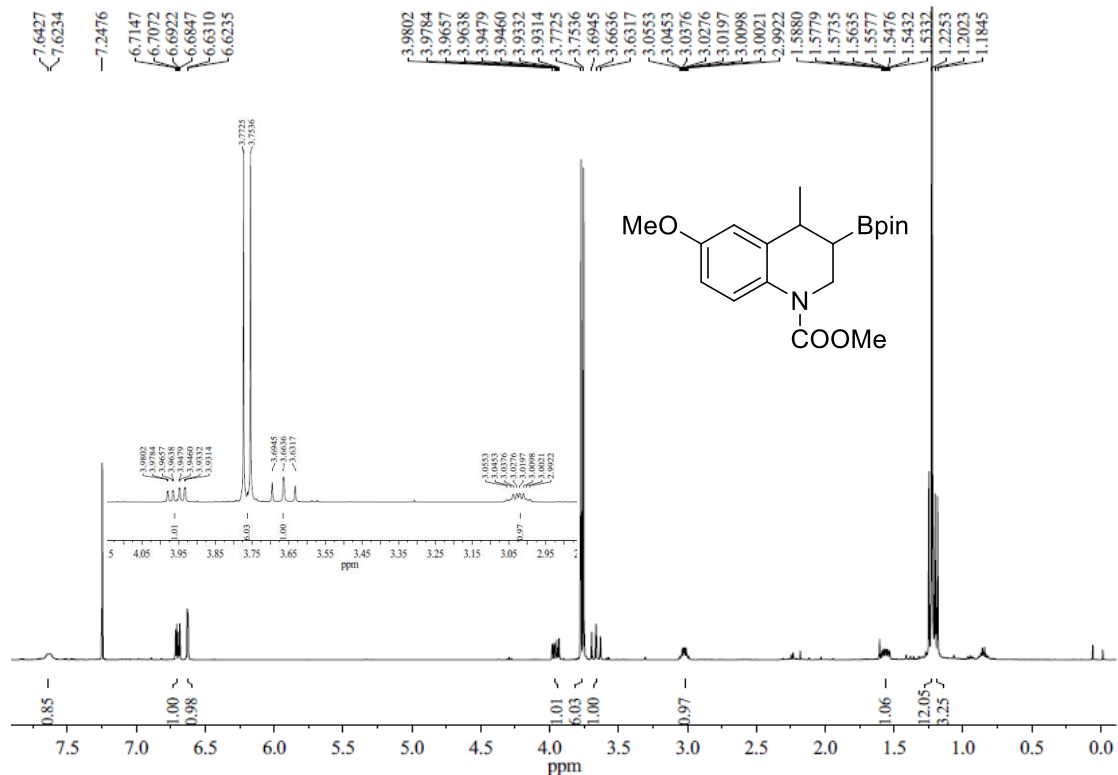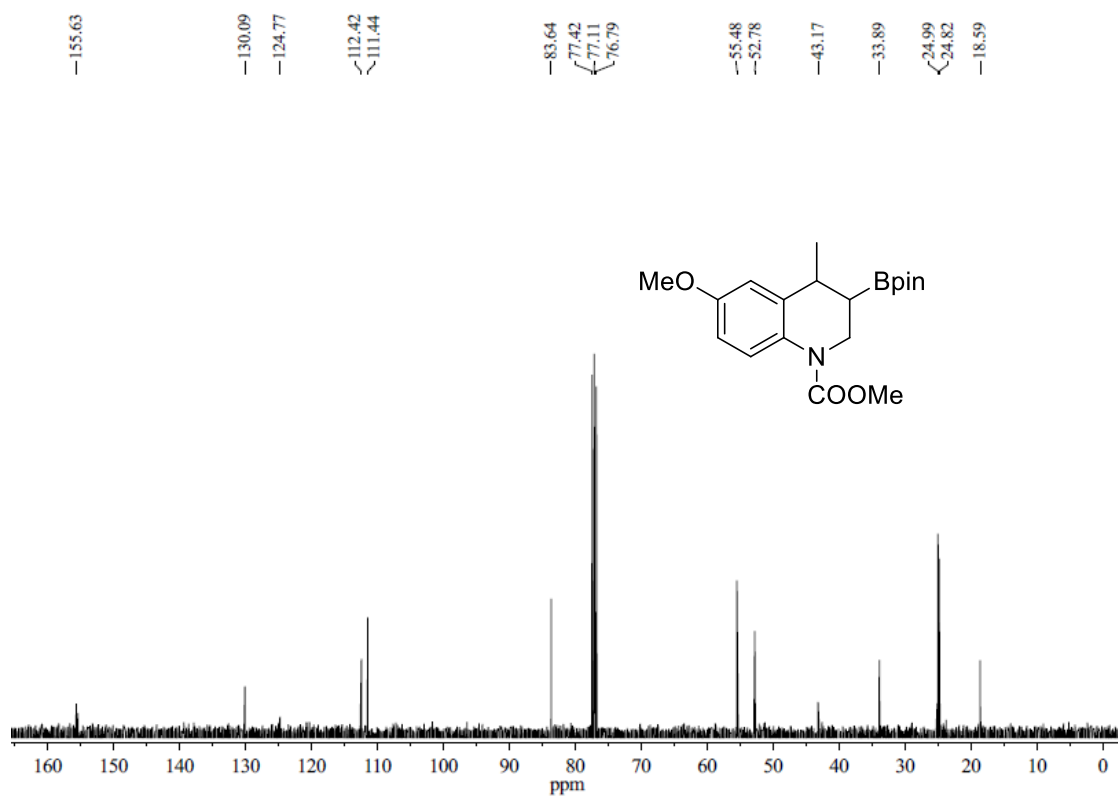



methyl 6-bromo-4-methyl-3-(4,4,5,5-tetramethyl-1,3,2-dioxaborolan-2-yl)-3,4-dihydroquinoline-1(2H)-carboxylate (2e)

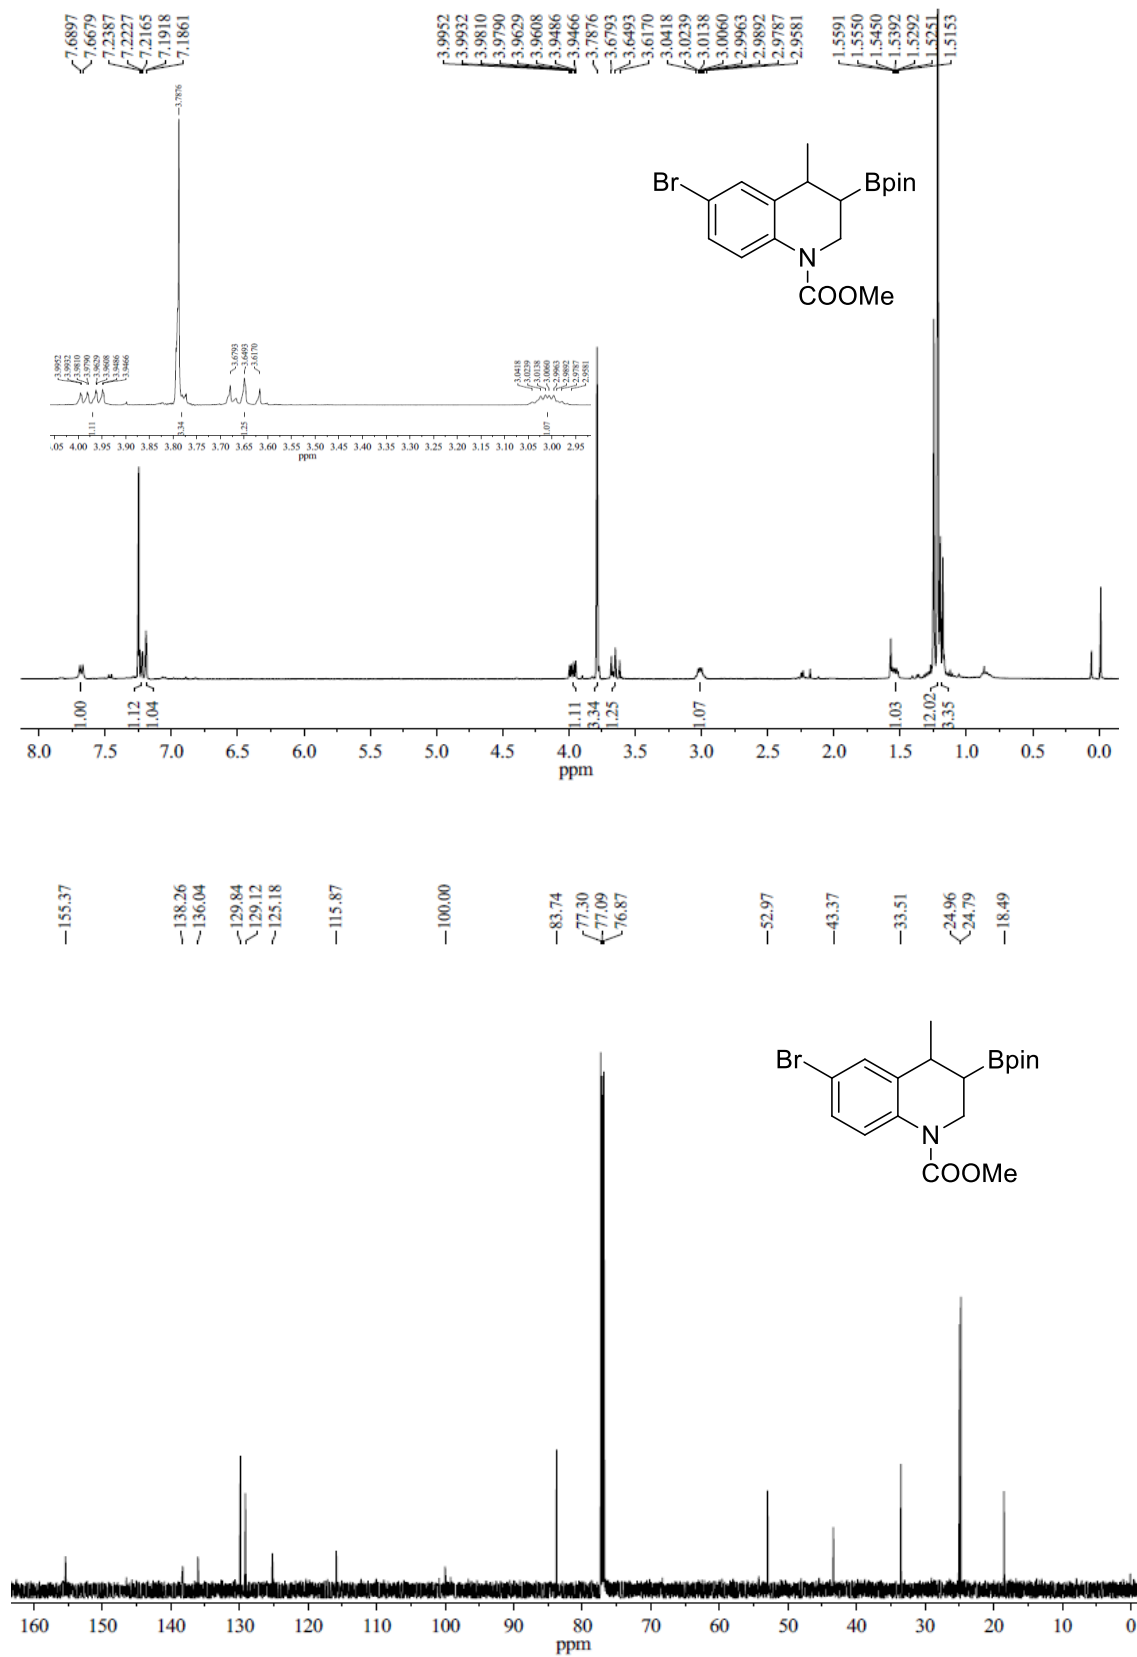

methyl **7-bromo-4-methyl-3-(4,4,5,5-tetramethyl-1,3,2-dioxaborolan-2-yl)-3,4-dihydroquinoline-1(2H)-carboxylate (2f)**

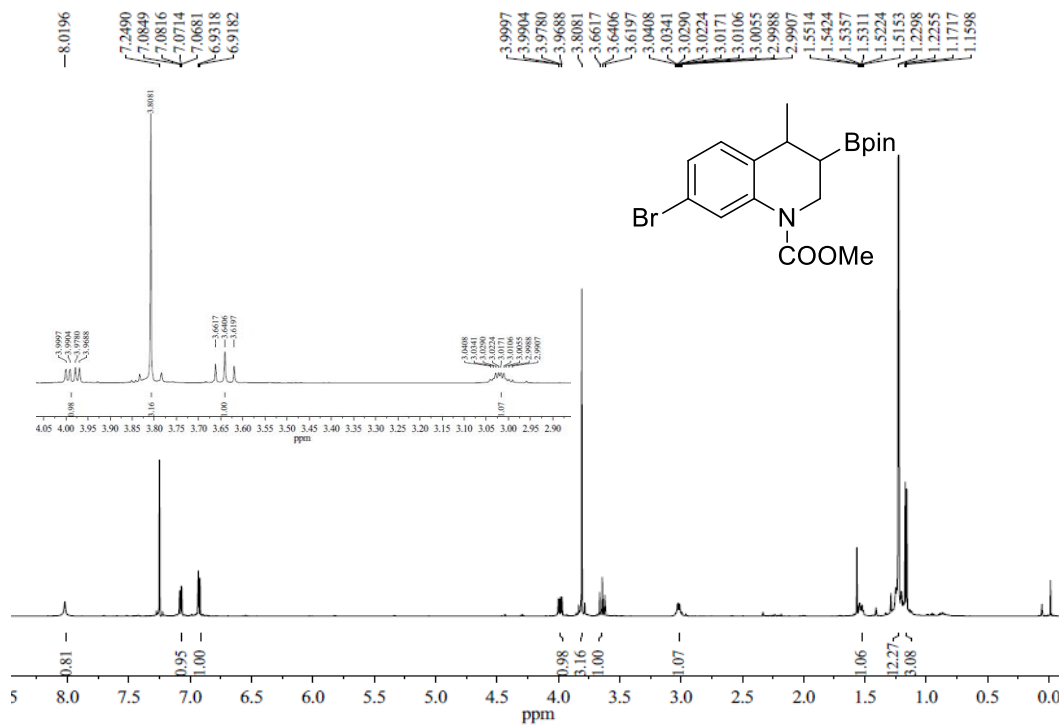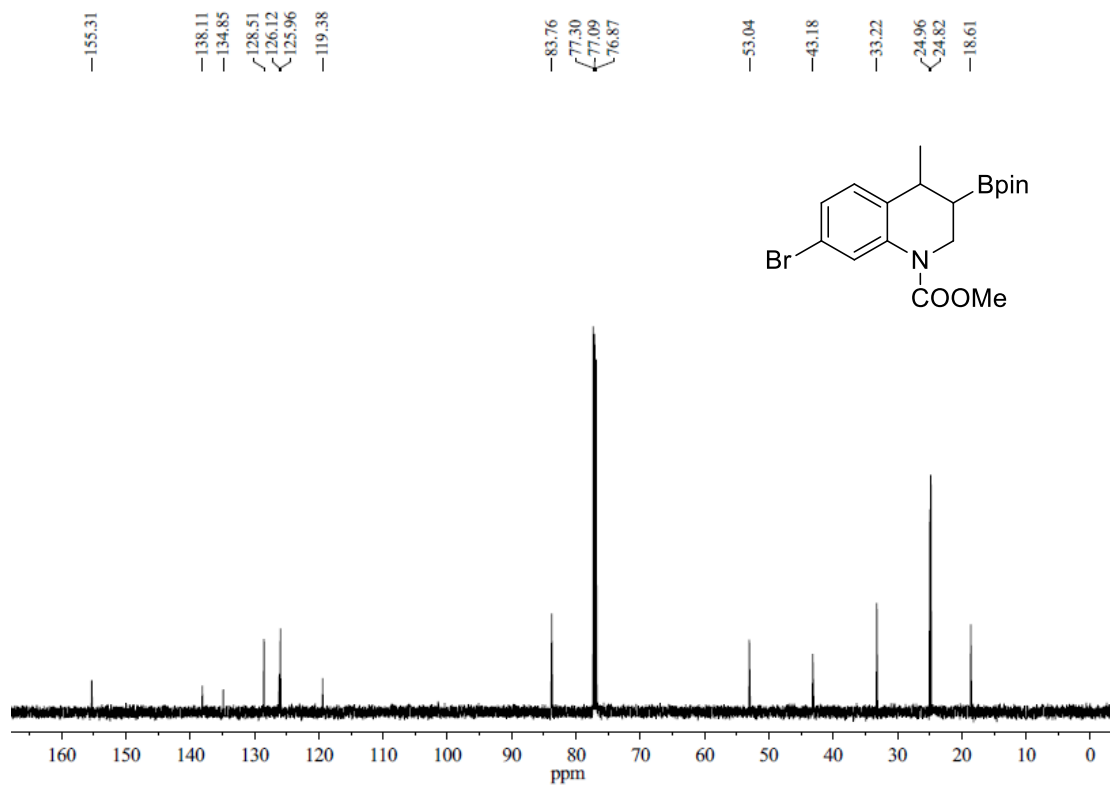

**Isopropyl 4-methyl-3-(4,4,5,5-tetramethyl-1,3,2-dioxaborolan-2-yl)-3,4-dihydroquinoline-1(2H)-carboxylate (2g)**

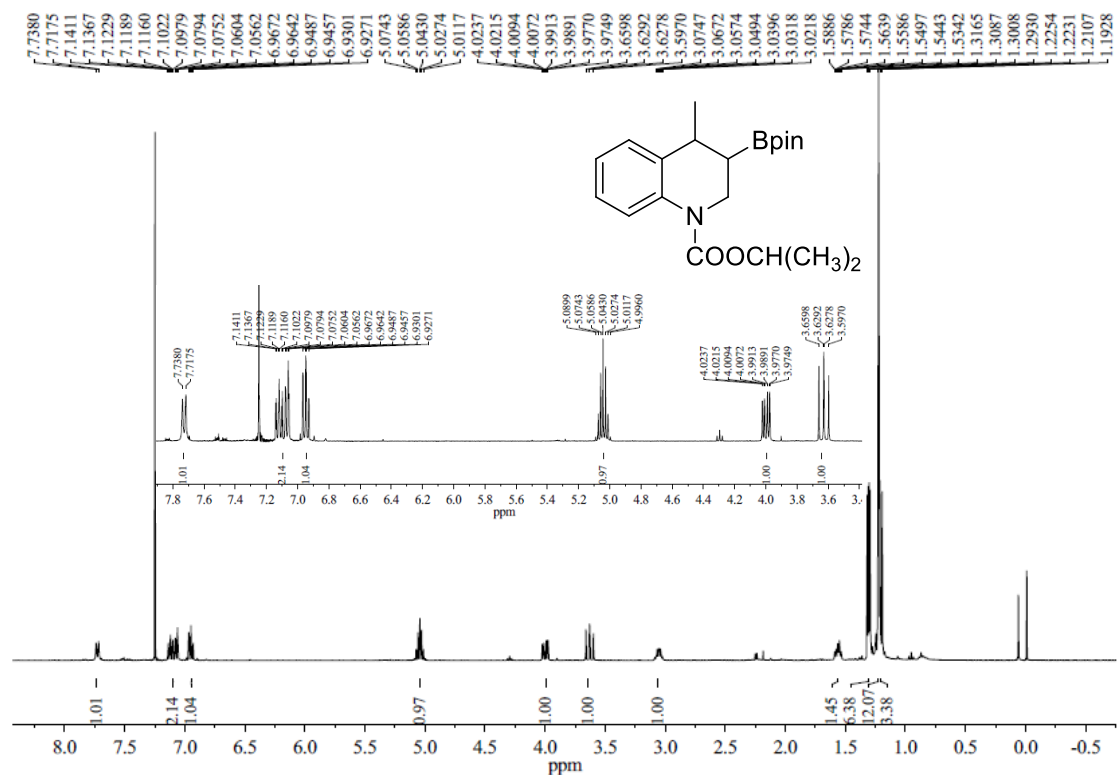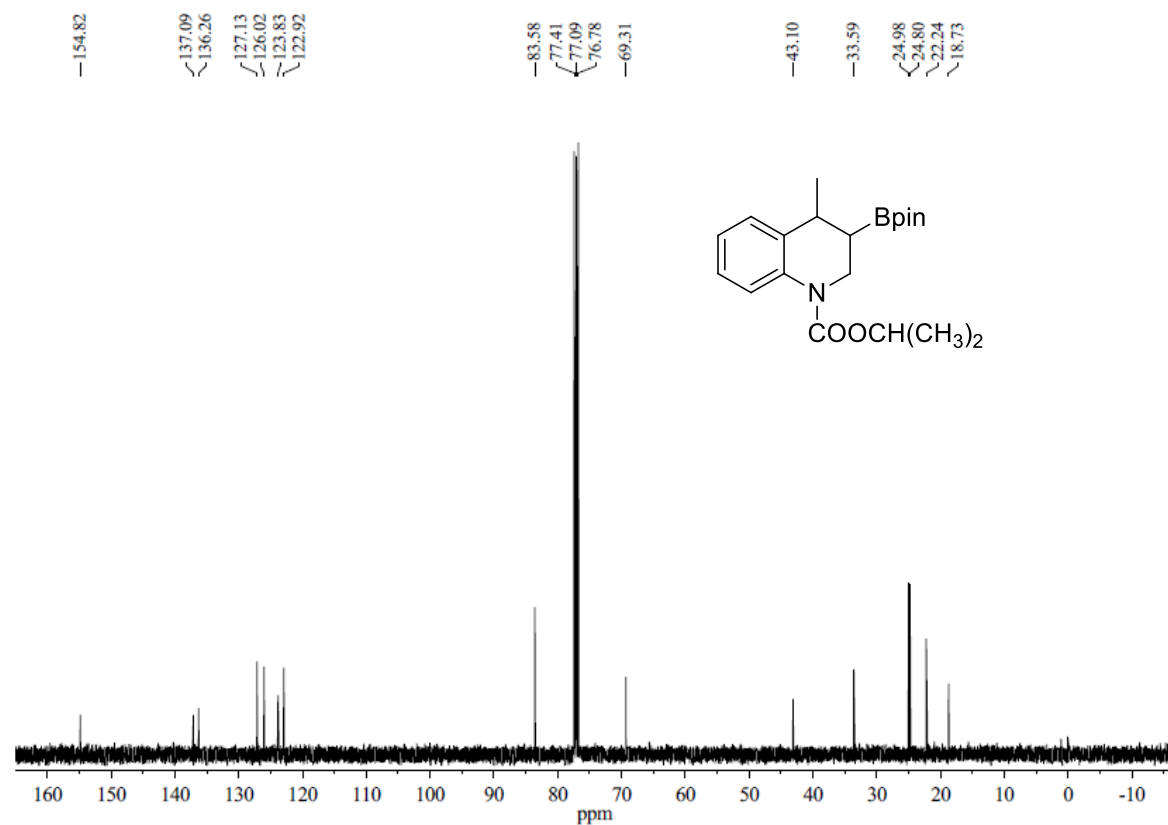

**Isobutyl 4-methyl-3-(4,4,5,5-tetramethyl-1,3,2-dioxaborolan-2-yl)-3,4-dihydroquinoline-1(2H)-carboxylate (2h)**

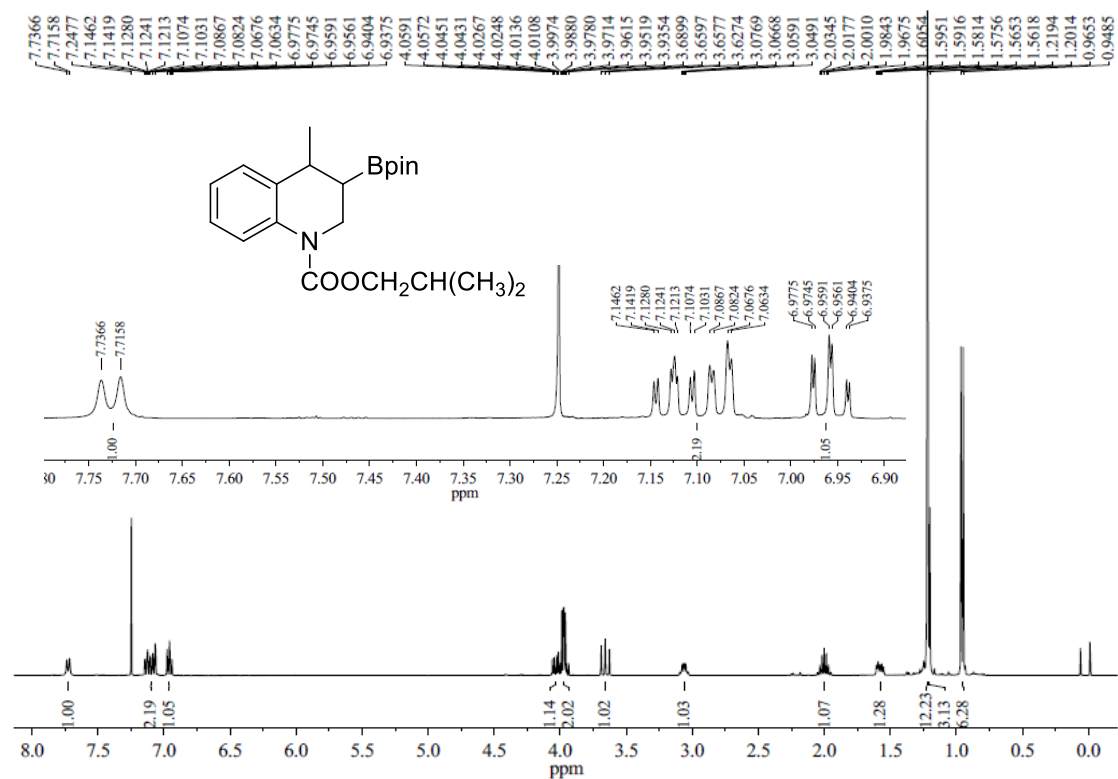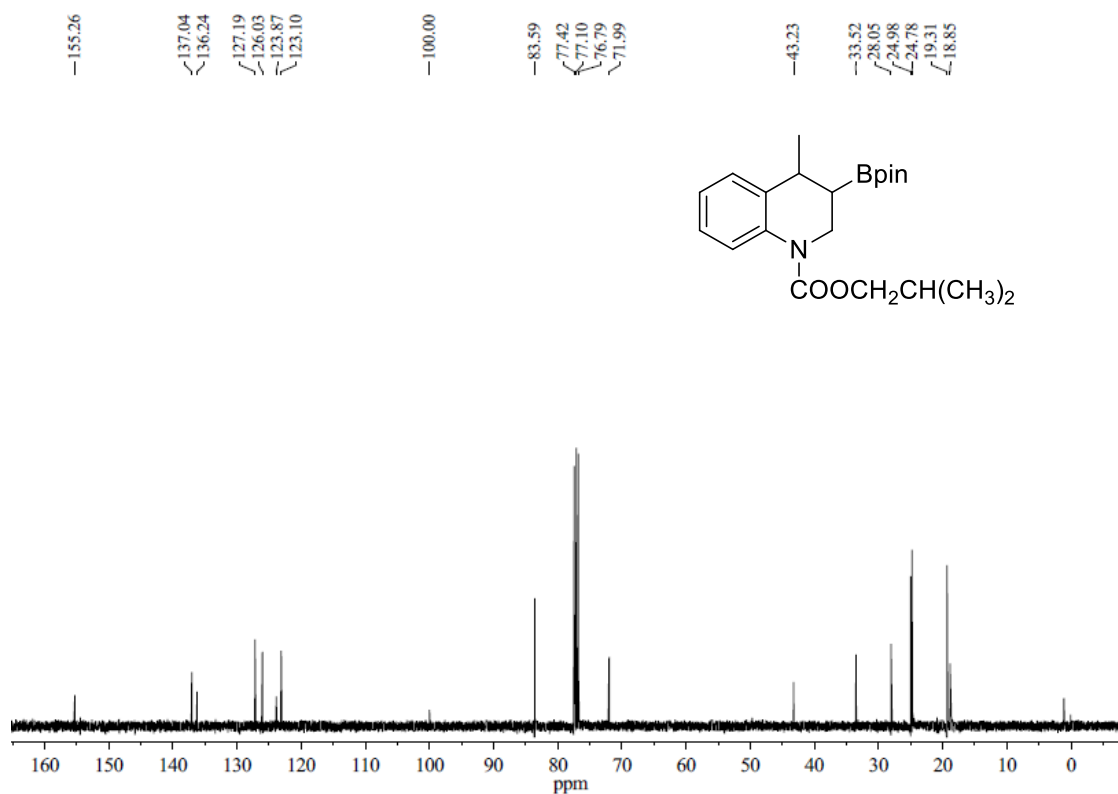

**Phenyl 4-methyl-3-(4,4,5,5-tetramethyl-1,3,2-dioxaborolan-2-yl)-3,4-dihydroquinoline-1(2H)-carboxylate (2i)**

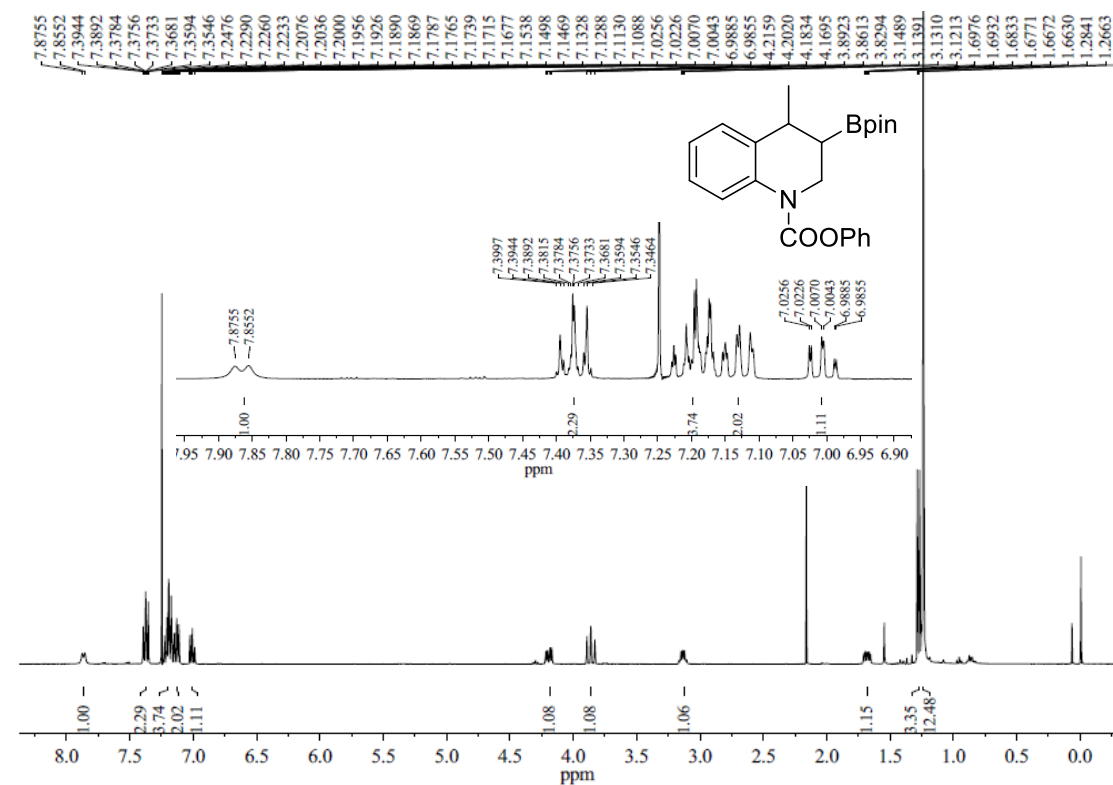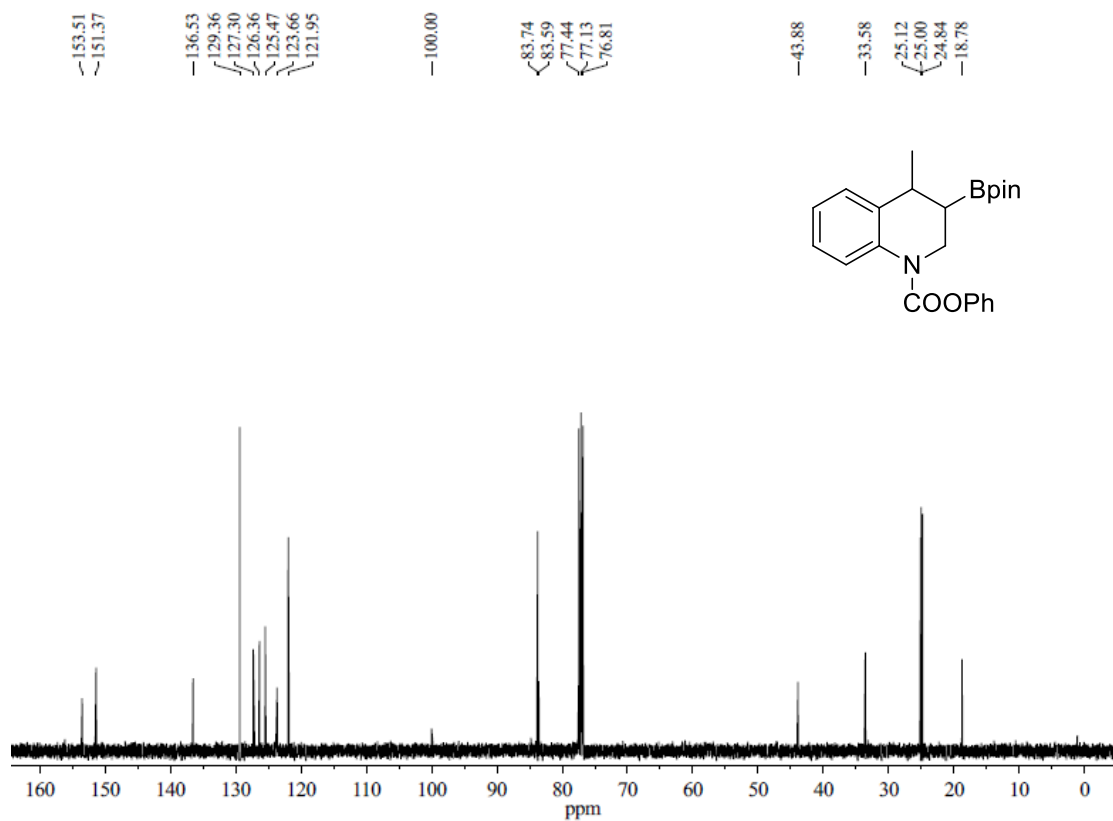

**Benzyl 4-methyl-3-(4,4,5,5-tetramethyl-1,3,2-dioxaborolan-2-yl)-3,4-dihydroquinoline-1(2H)-carboxylate (2j)**

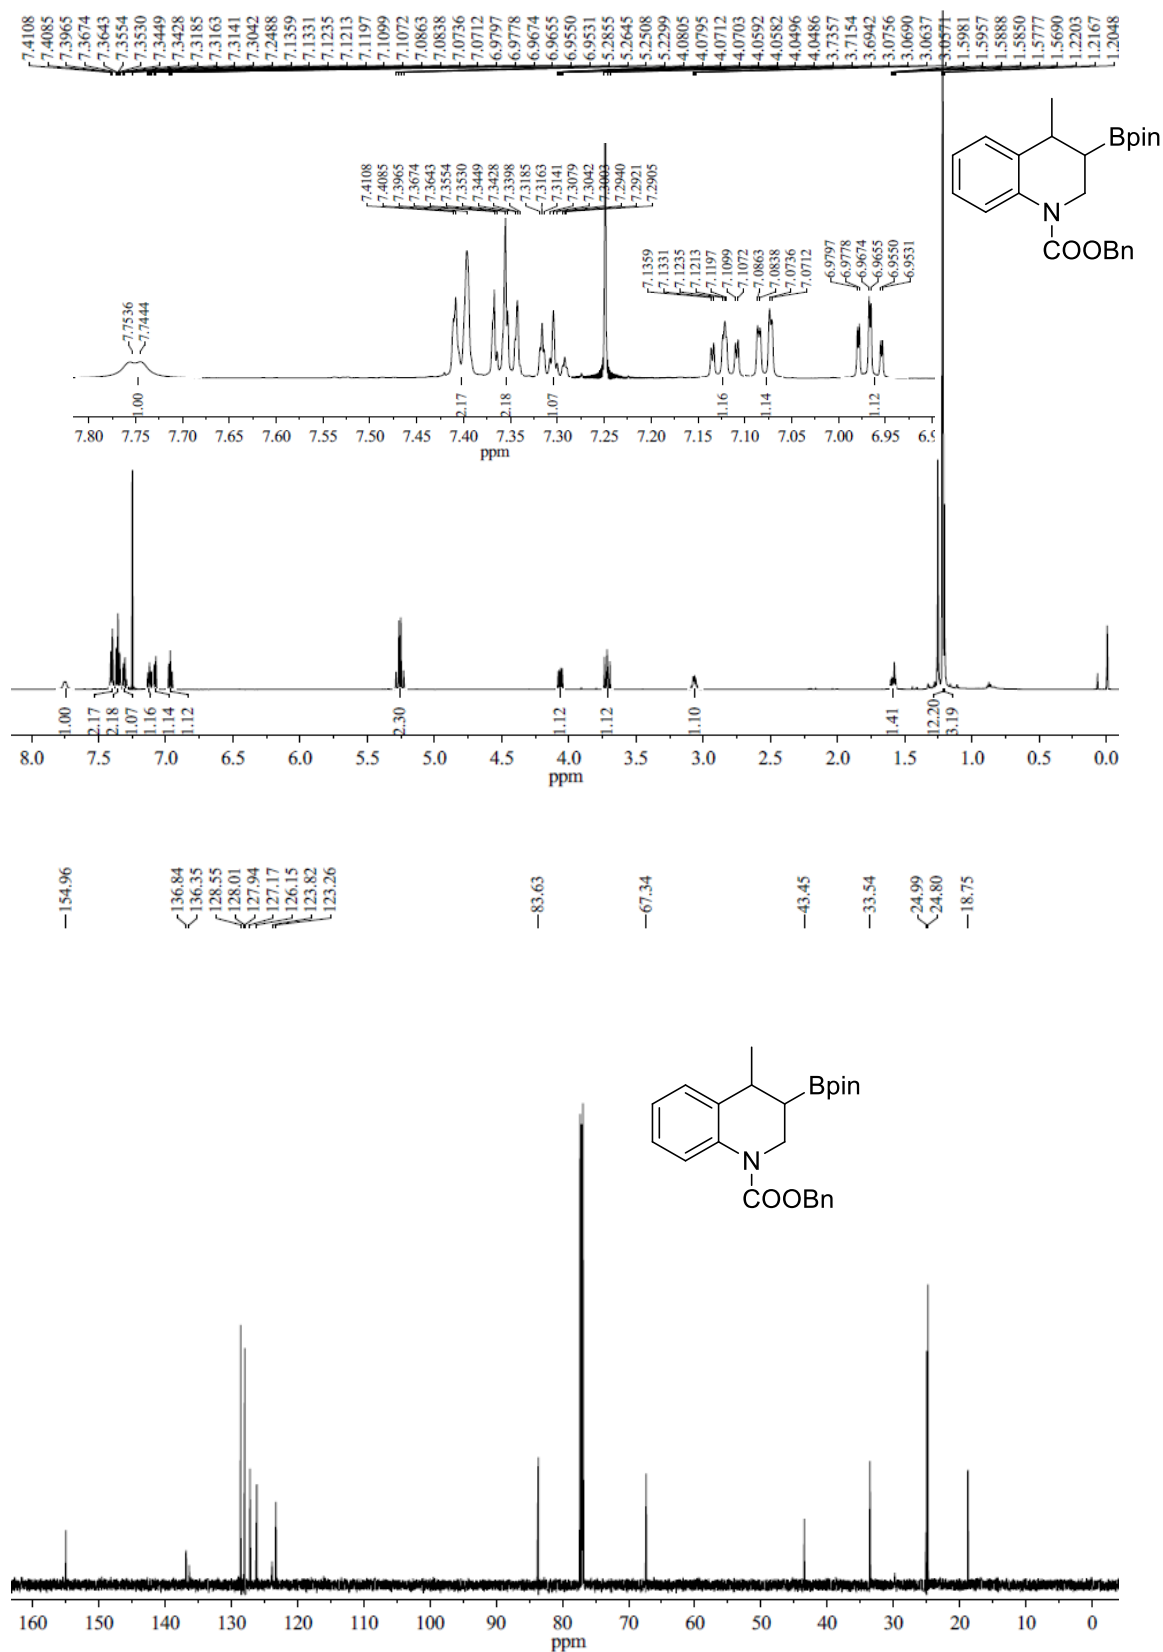

1-(4-methyl-3-(4,4,5,5-tetramethyl-1,3,2-dioxaborolan-2-yl)-3,4-dihydroquinolin-1(2H)-yl)ethanone (2k)

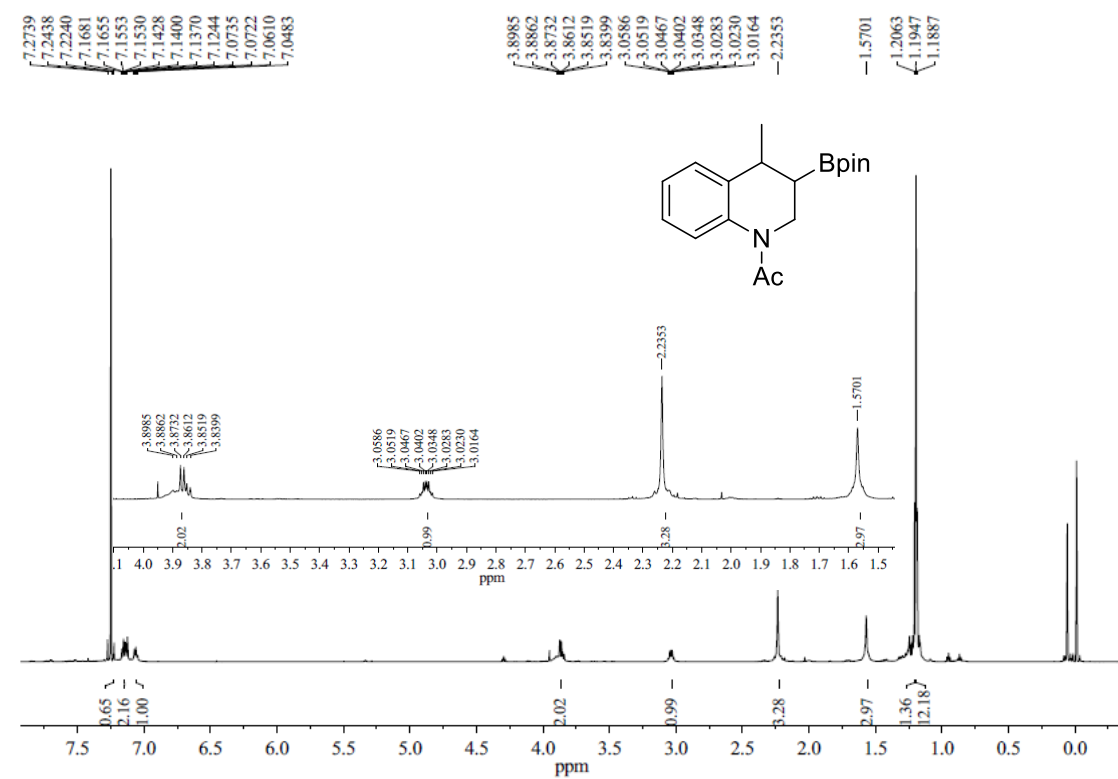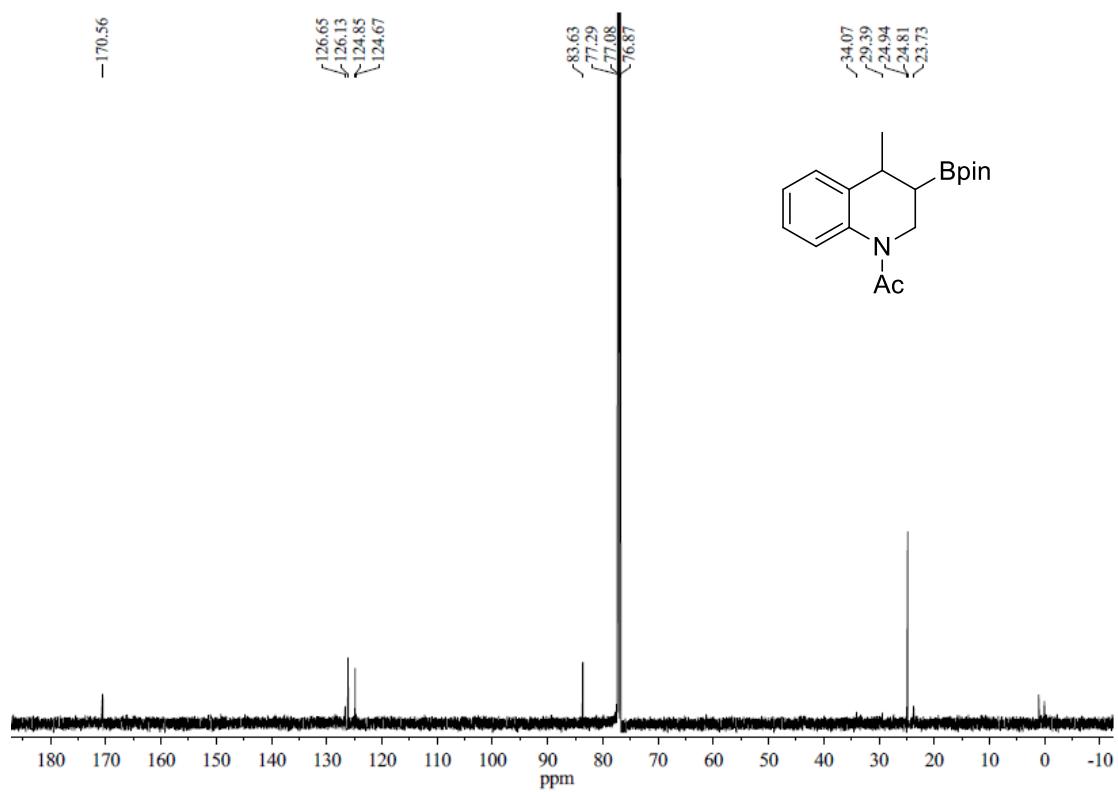

**methyl 4-ethyl-3-(4,4,5,5-tetramethyl-1,3,2-dioxaborolan-2-yl)-3,4-dihydroquinoline-1(2H)-carboxylate (2l)**

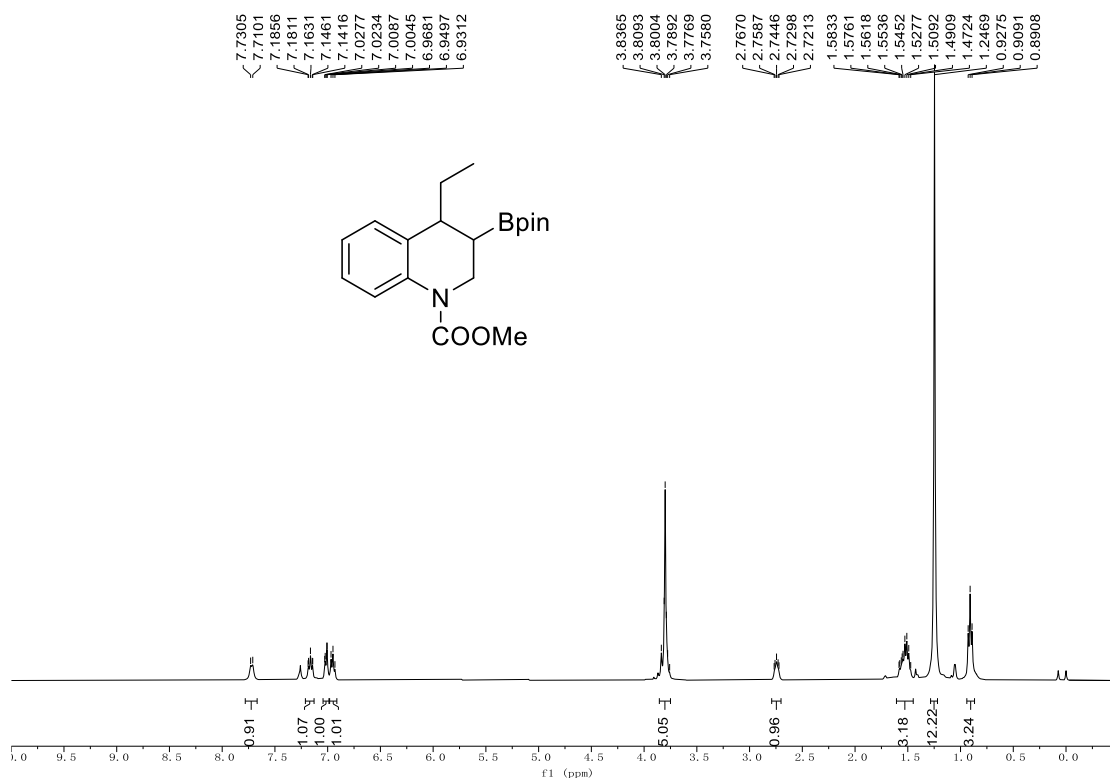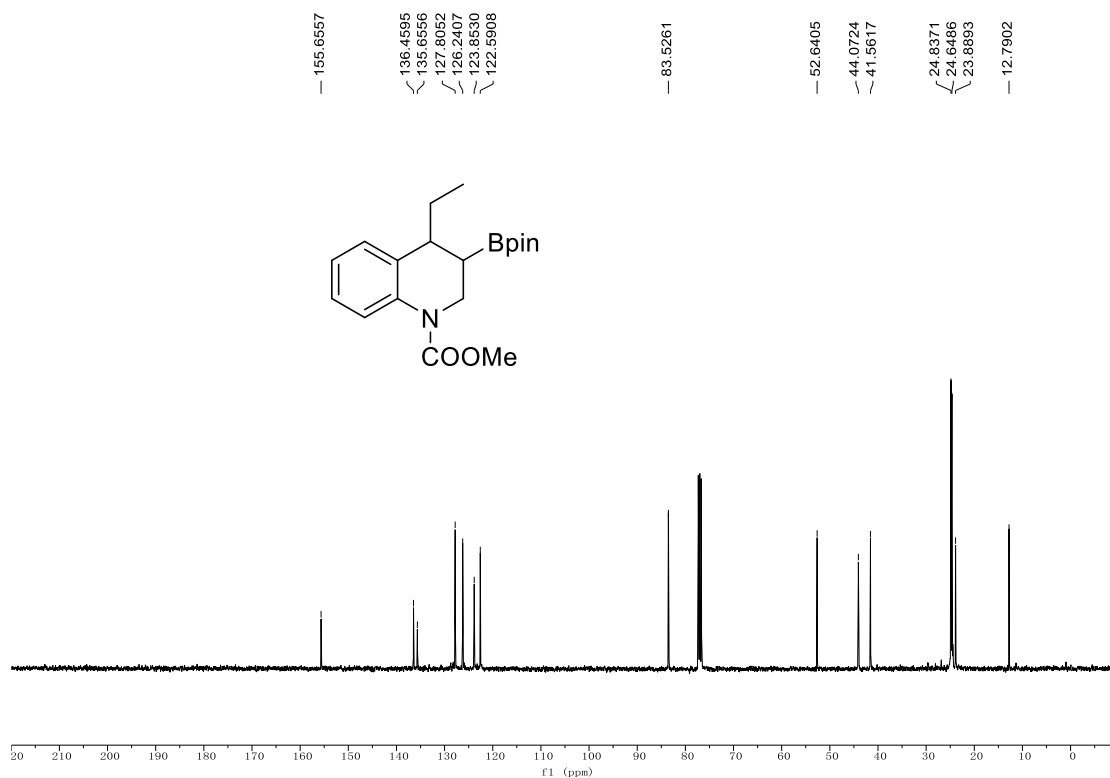



**methyl 4-benzyl-3-hydroxy-3,4-dihydroquinoline-1(2H)-carboxylate (2m)**

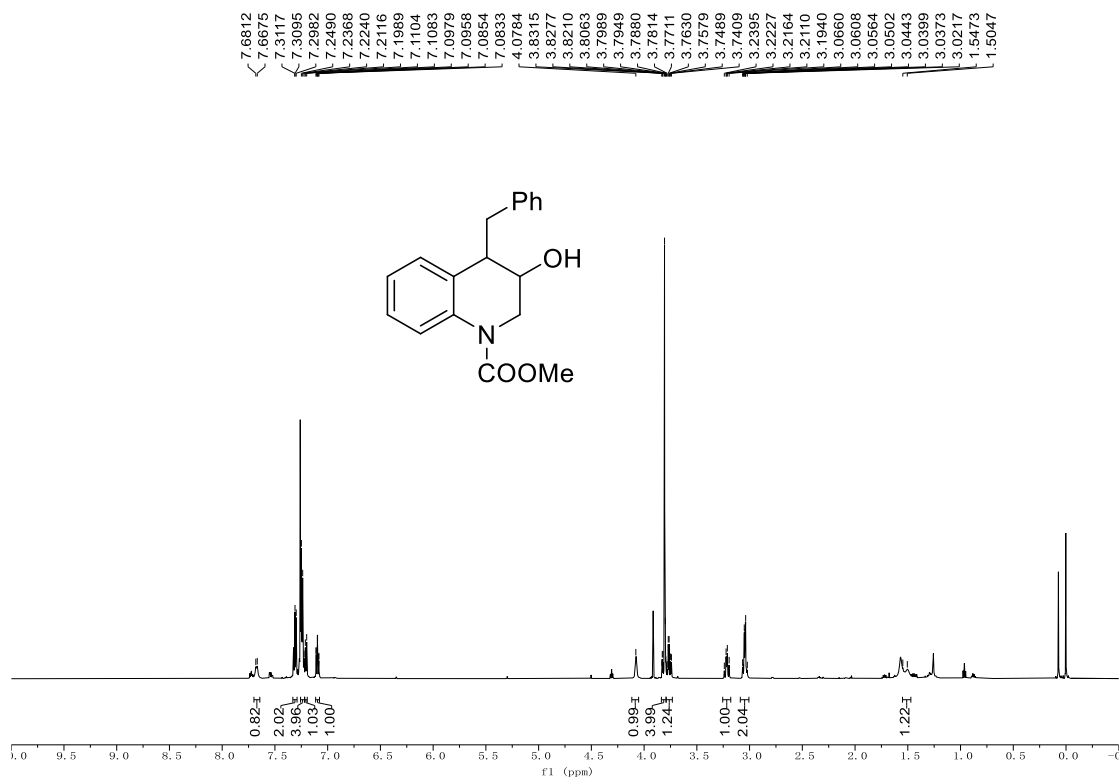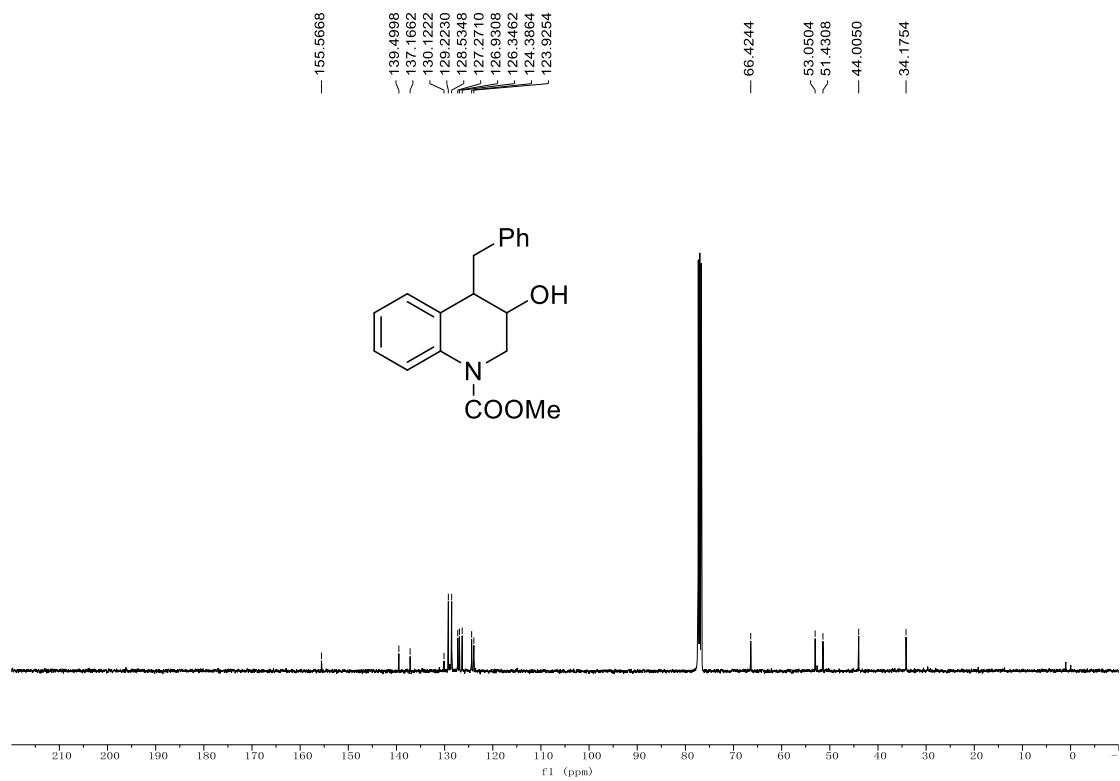

4,4,5,5-tetramethyl-2-(4-methylchroman-3-yl)-1,3,2-dioxaborolane (4a)

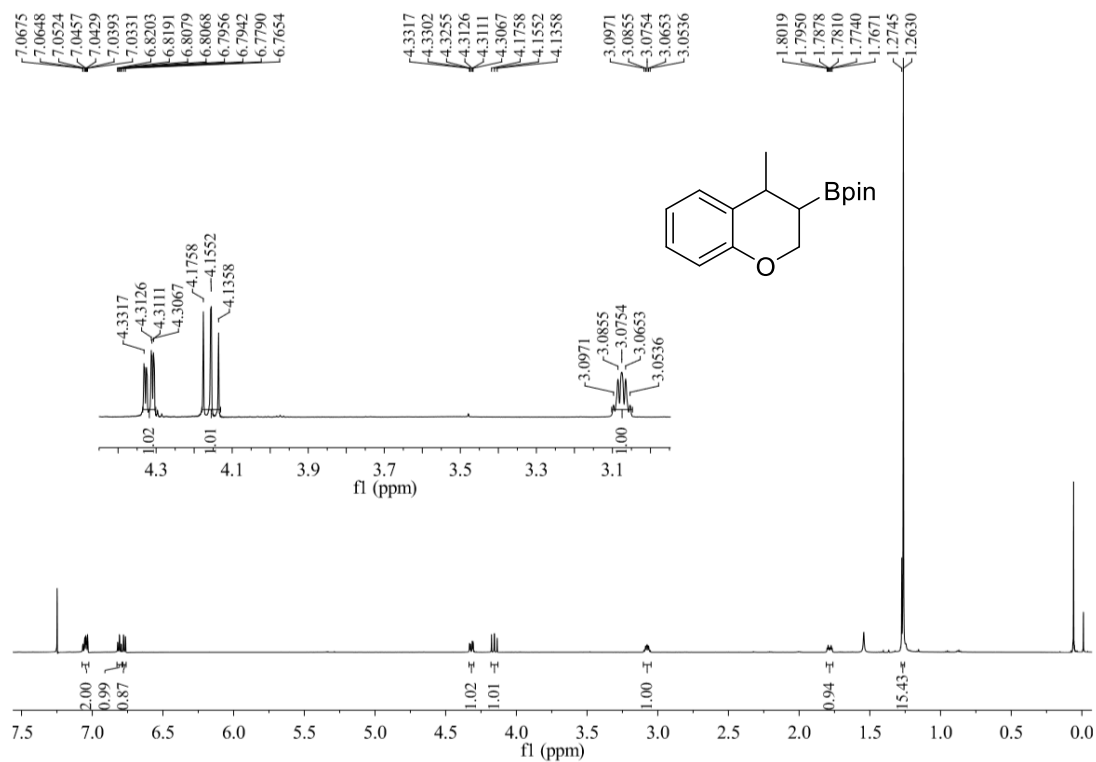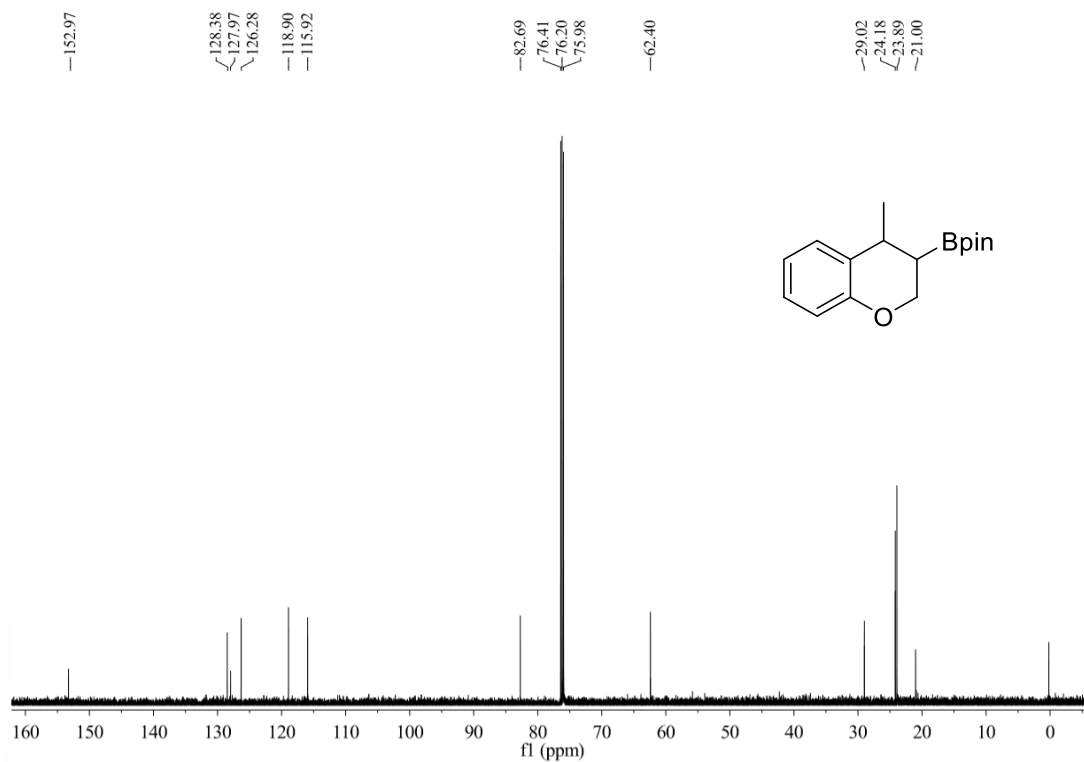

2-(4,8-dimethylchroman-3-yl)-4,4,5,5-tetramethyl-1,3,2-dioxaborolane (4b)

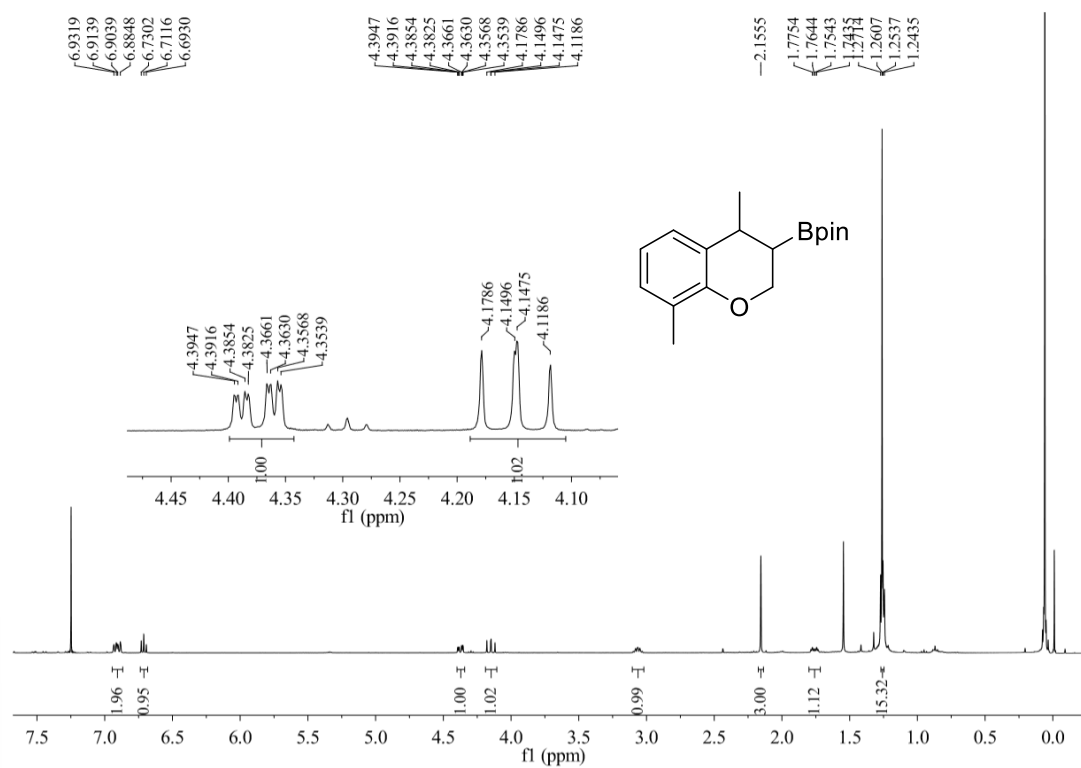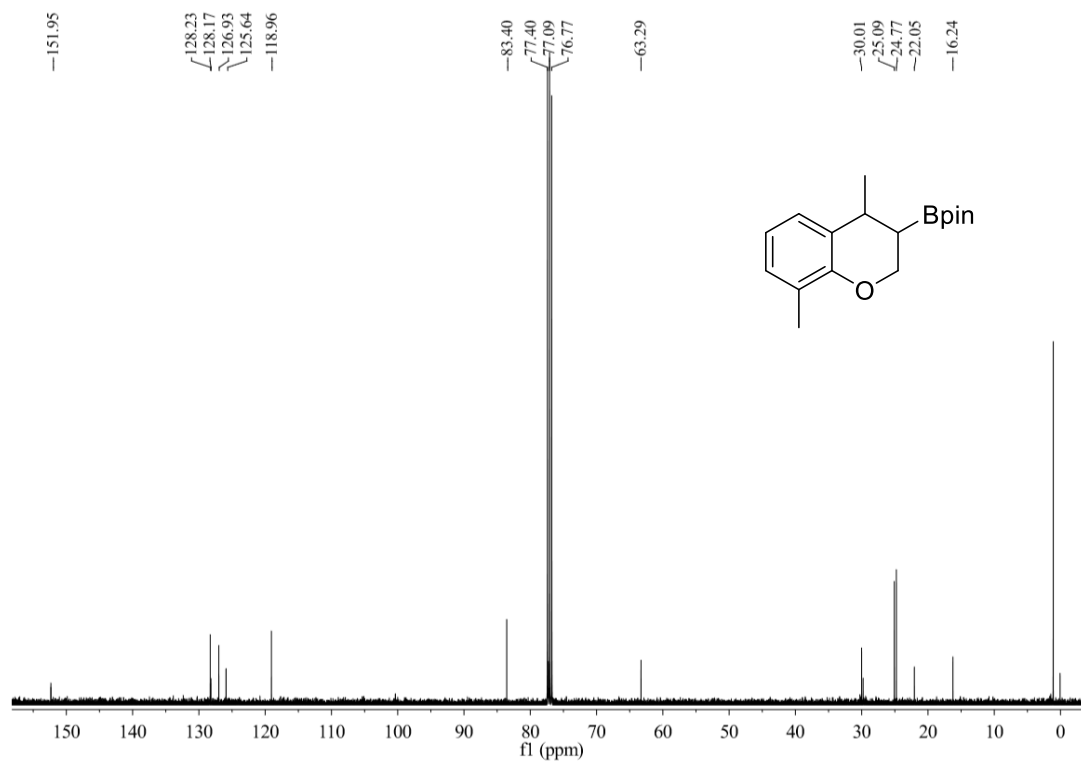

**2-(8-isopropyl-4-methylchroman-3-yl)-4,4,5,5-tetramethyl-1,3,2-dioxaborolane (4c)**

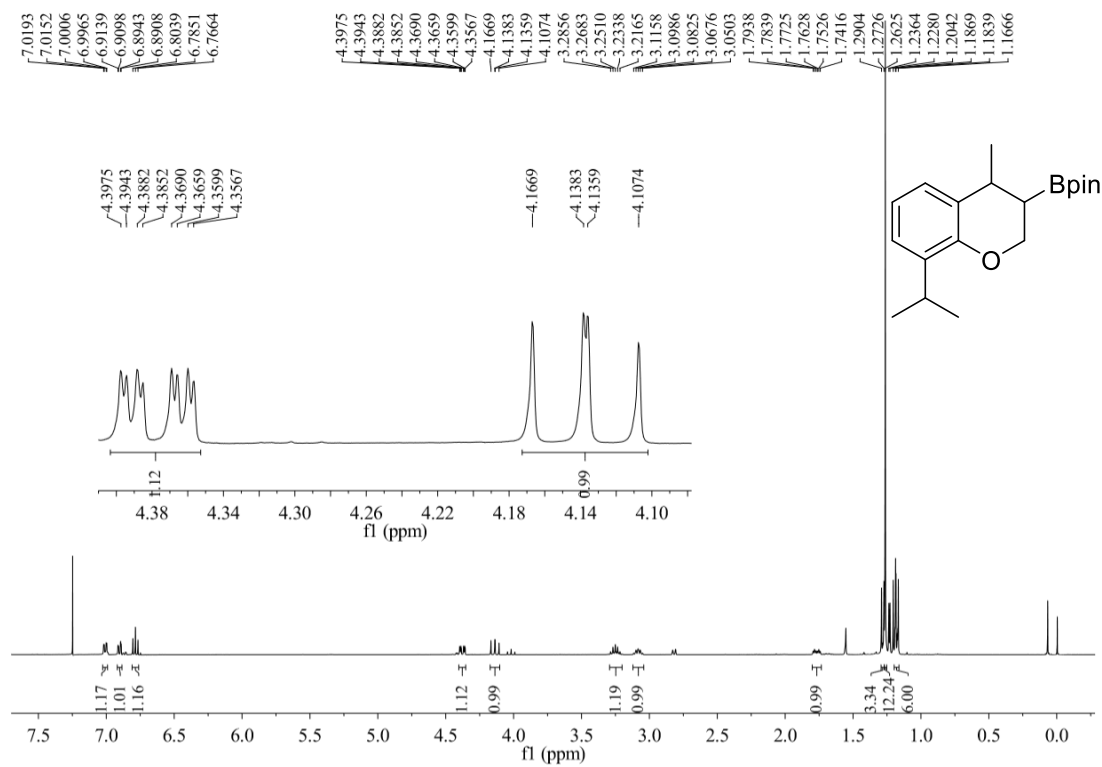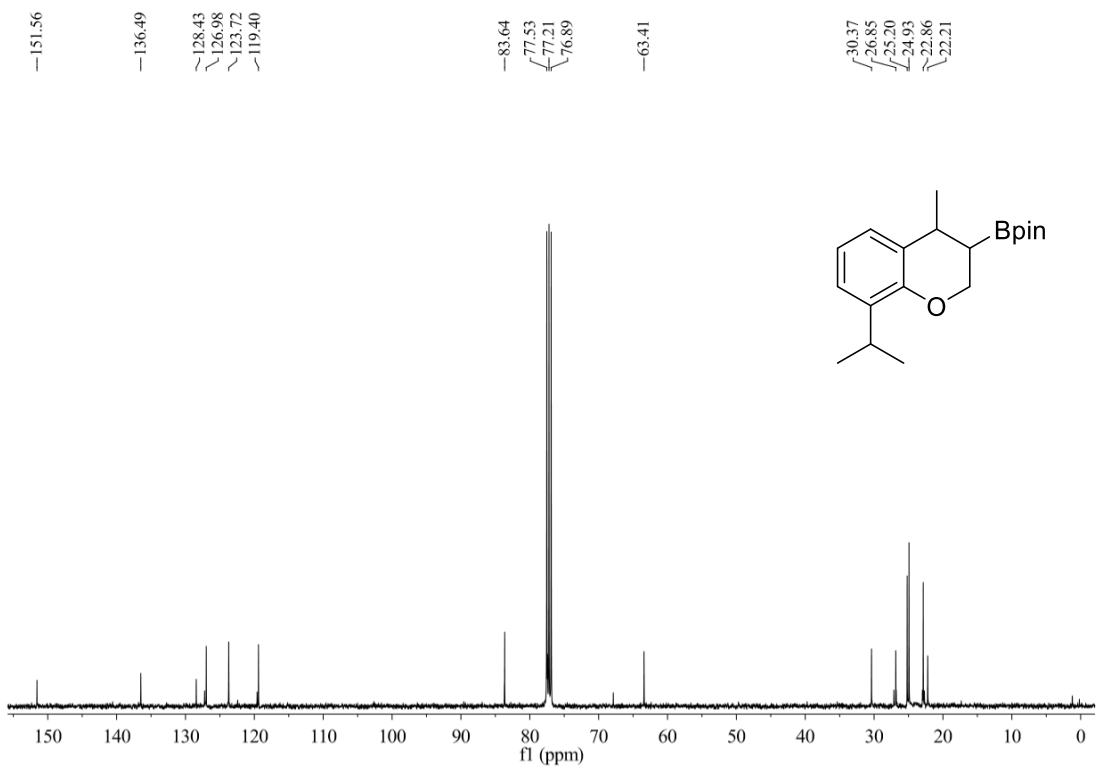

**2-(8-(tert-butyl)-4-methylchroman-3-yl)-4,4,5,5-tetramethyl-1,3,2-dioxaborolane (4d)**

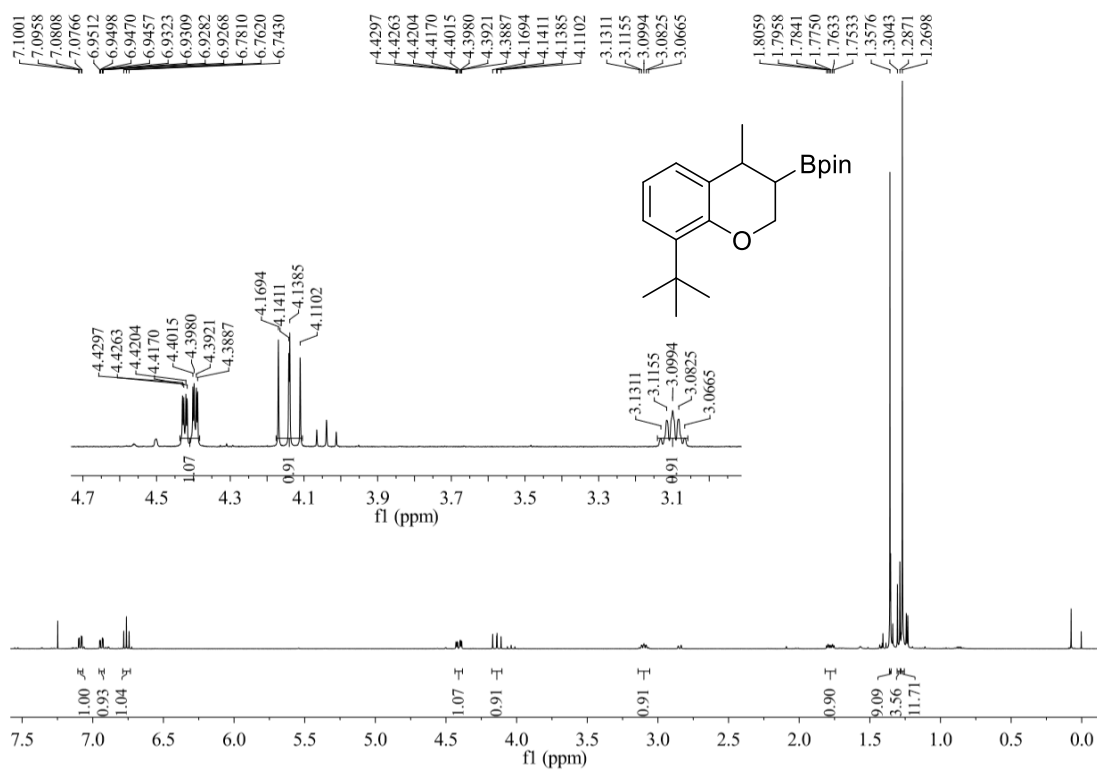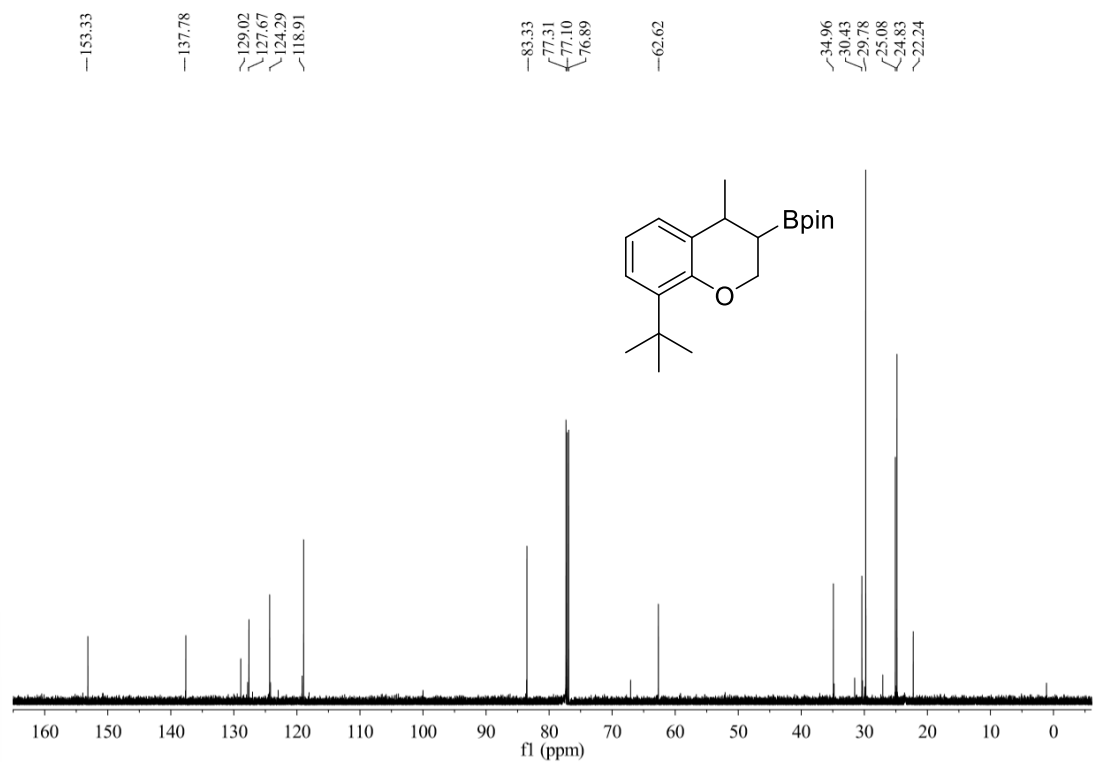

2-(8-methoxy-4-methylchroman-3-yl)-4,4,5,5-tetramethyl-1,3,2-dioxaborolane (4e)

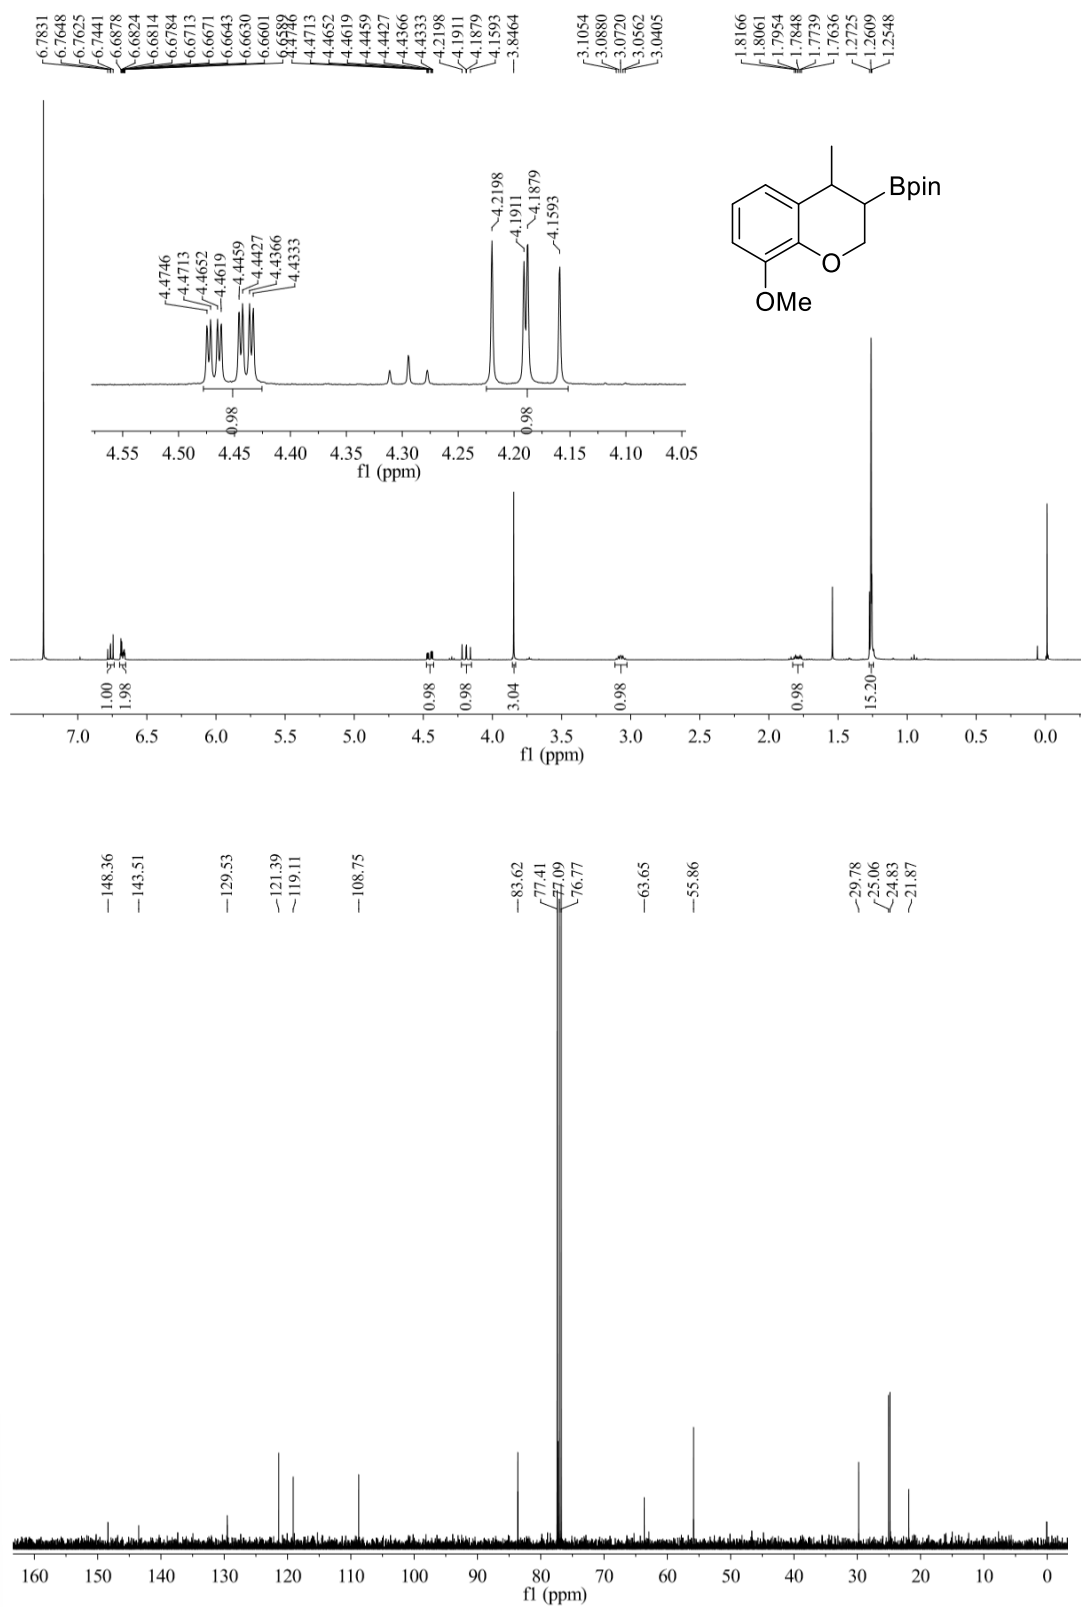

4,4,5,5-tetramethyl-2-(4-methyl-8-phenylchroman-3-yl)-1,3,2-dioxaborolane (4f)

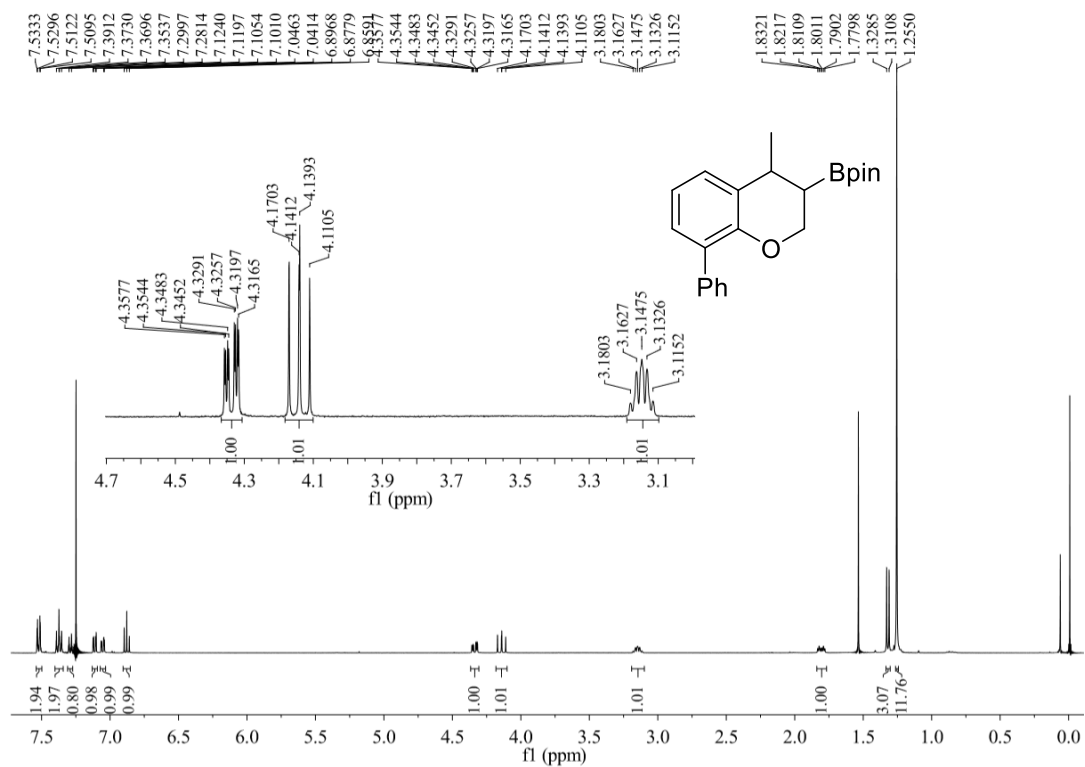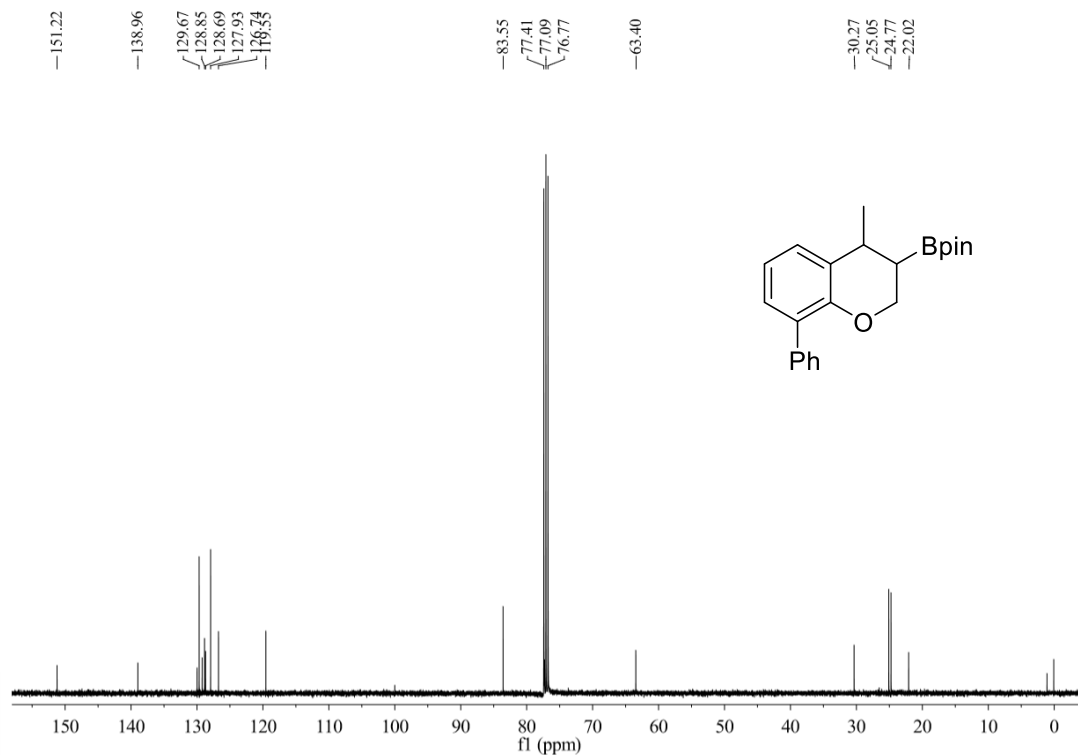

## 2-(8-chloro-4-methylchroman-3-yl)-4,4,5,5-tetramethyl-1,3,2-dioxaborolane (4g)

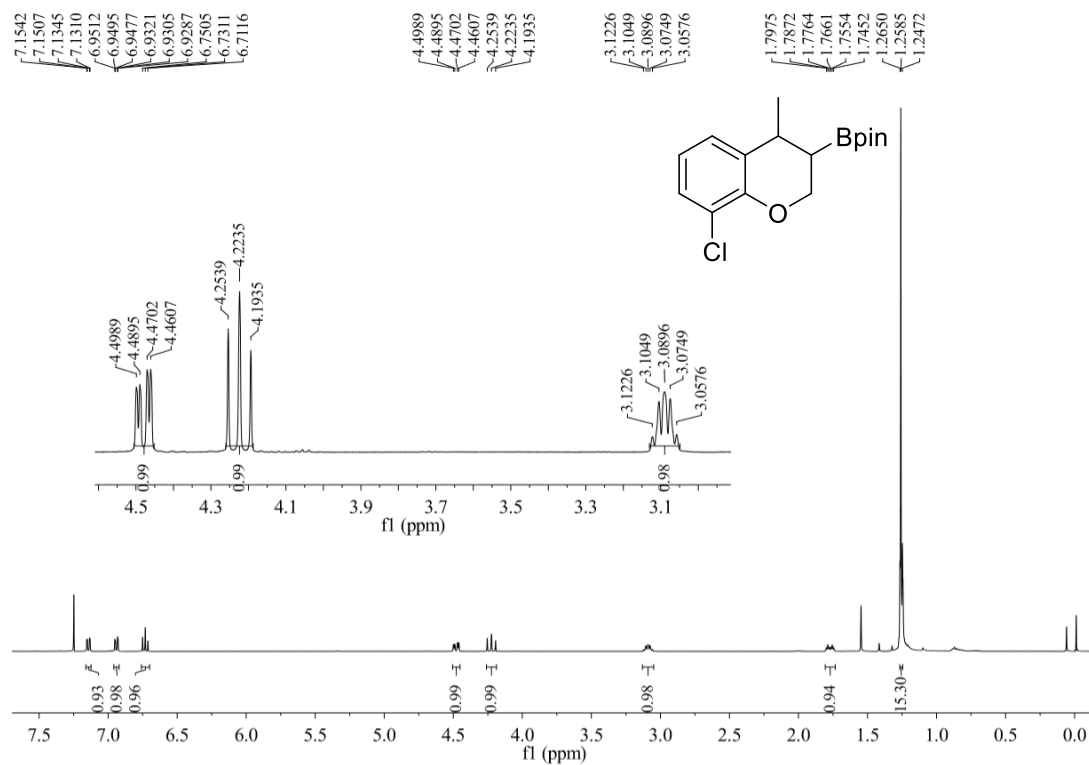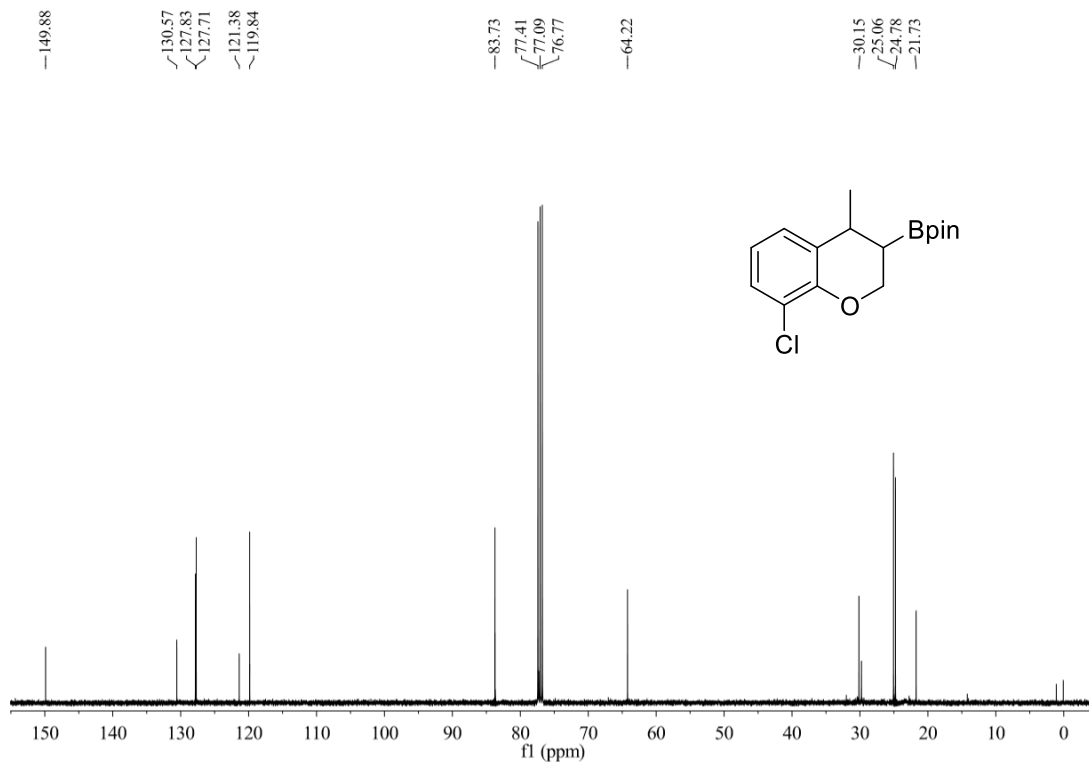





2-(7-bromo-4-methylchroman-3-yl)-4,4,5,5-tetramethyl-1,3,2-dioxaborolane (4i)

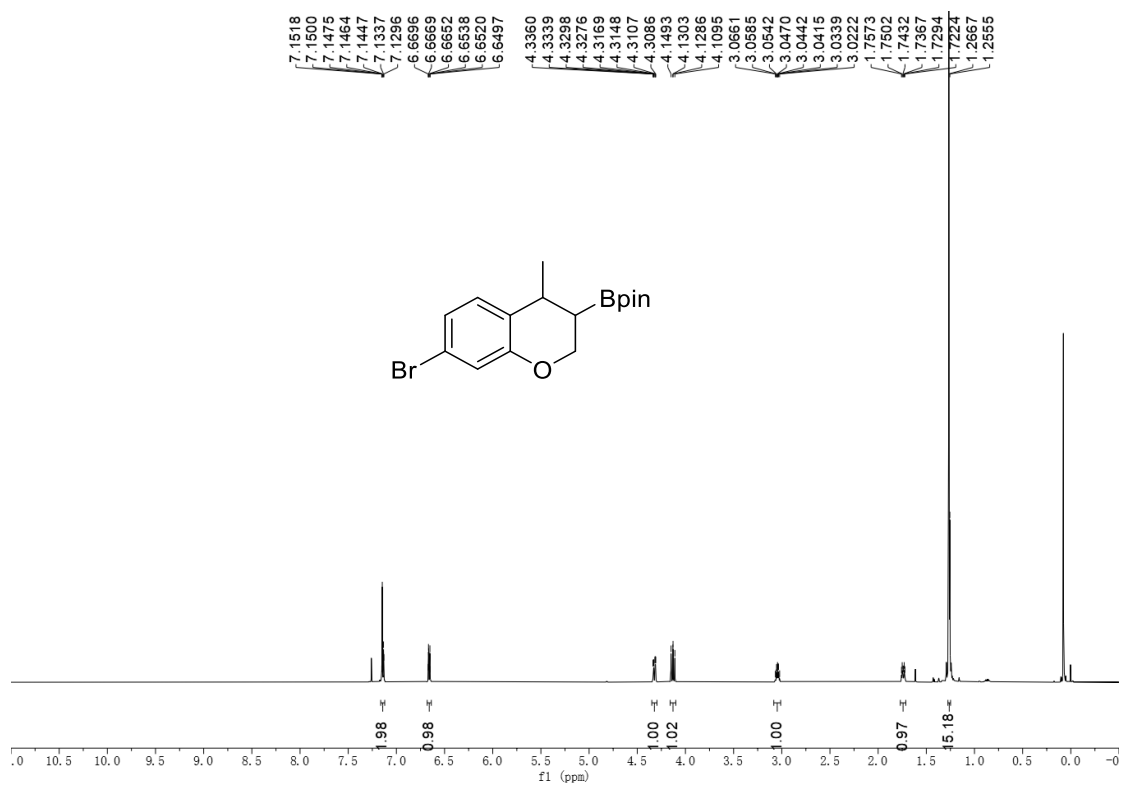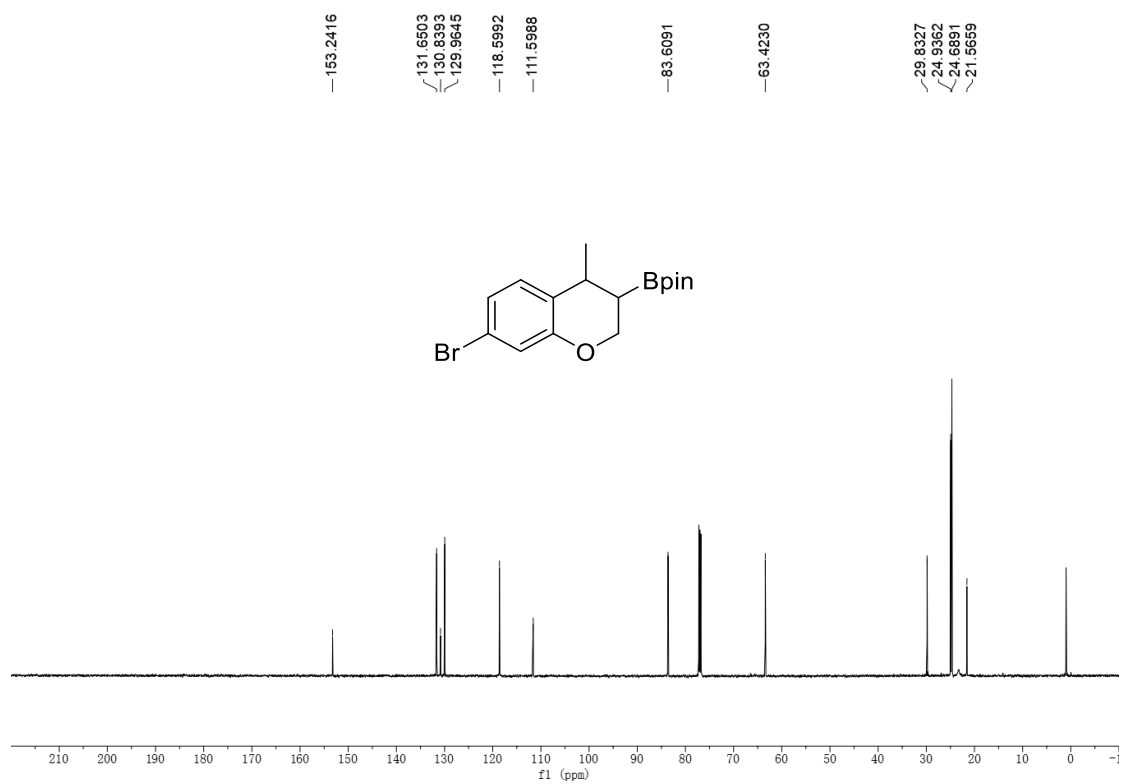

**4,4,5,5-tetramethyl-2-(4,6,8-trimethylchroman-3-yl)-1,3,2-dioxaborolane (4j)**

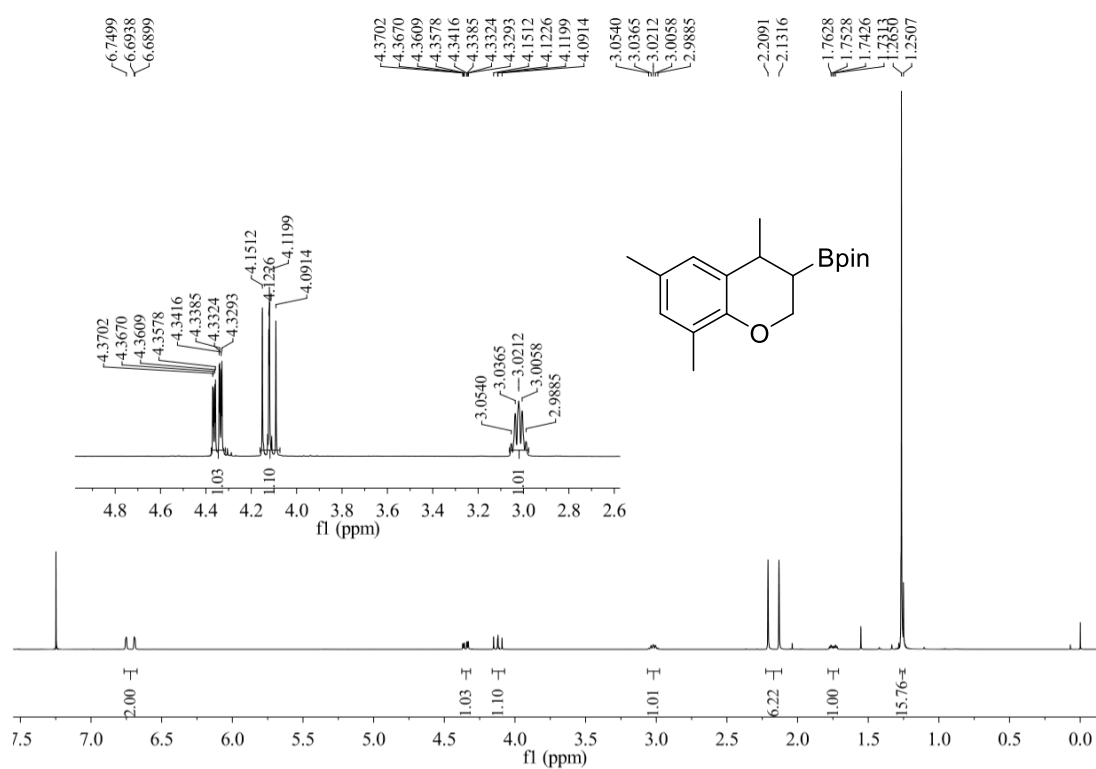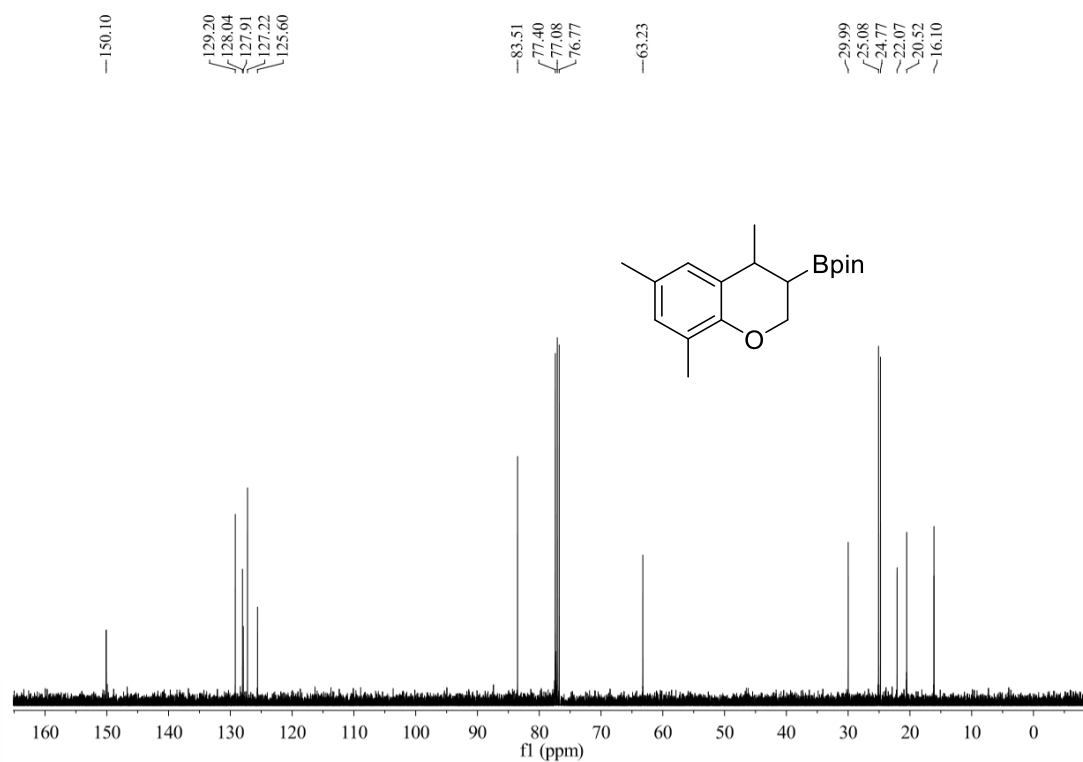

4,4,5,5-tetramethyl-2-(4,5,8-trimethylchroman-3-yl)-1,3,2-dioxaborolane (4k)

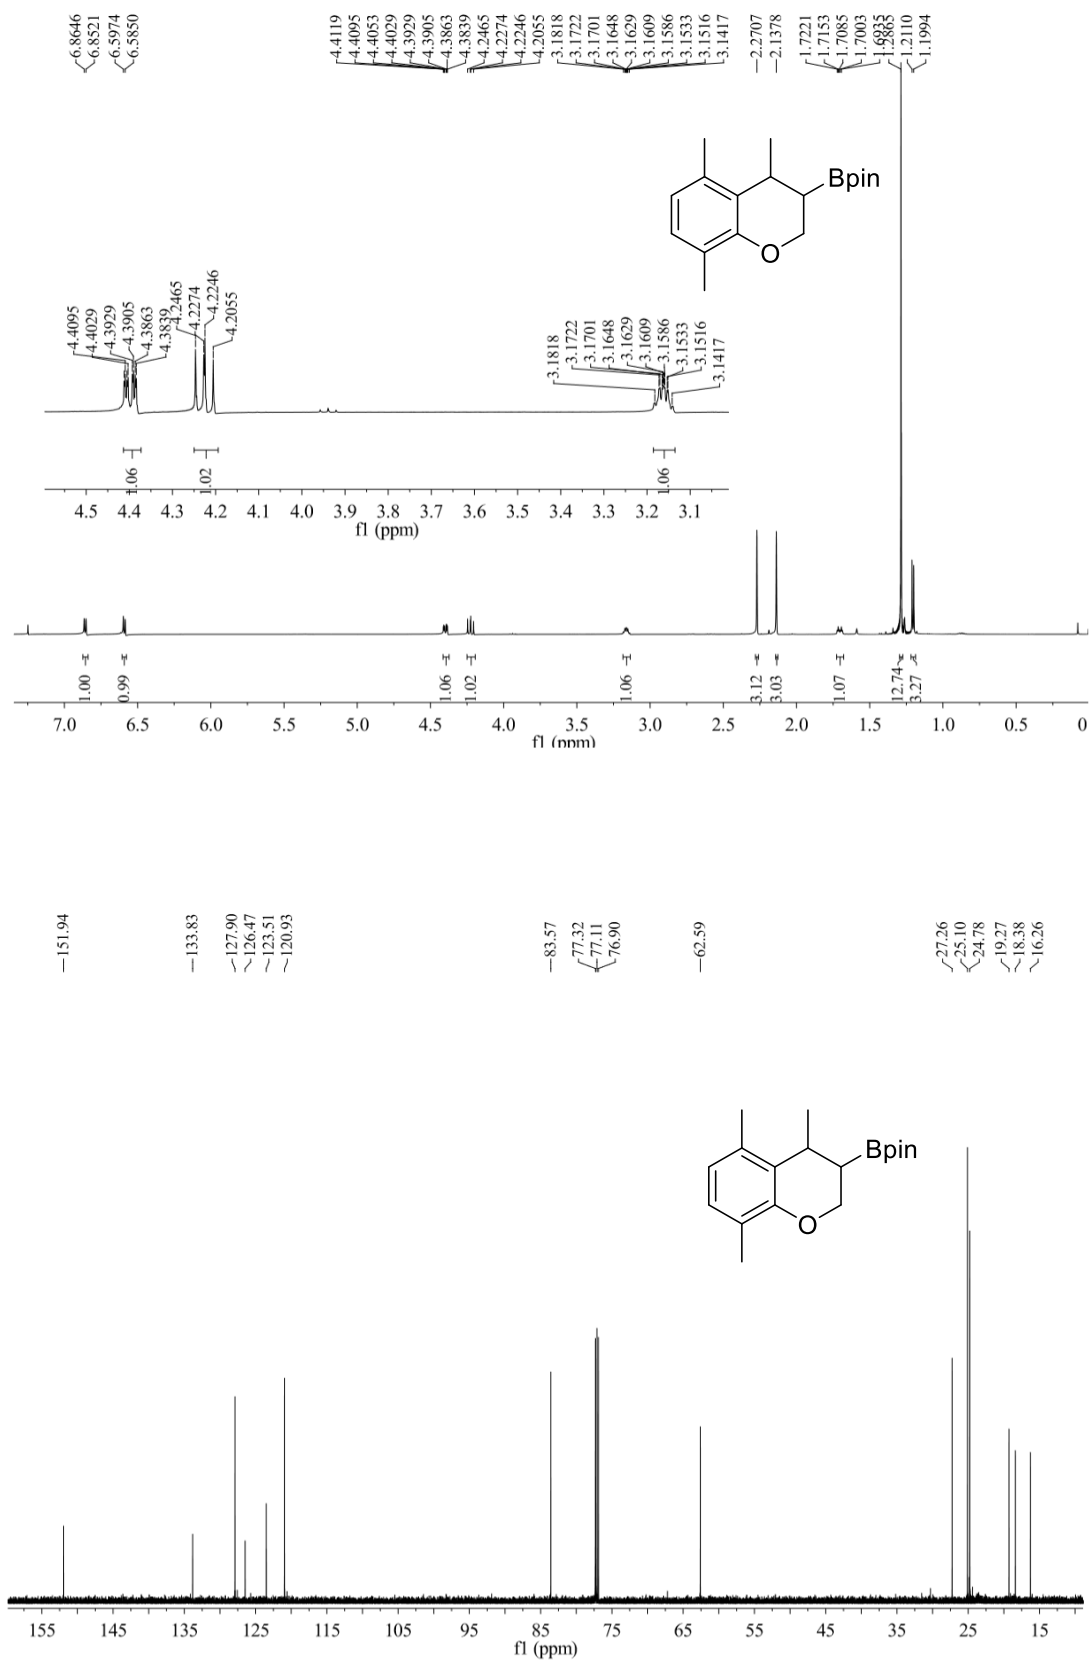

**2-(4,6-dimethylthiochroman-3-yl)-4,4,5,5-tetramethyl-1,3,2-dioxaborolane (4l)**

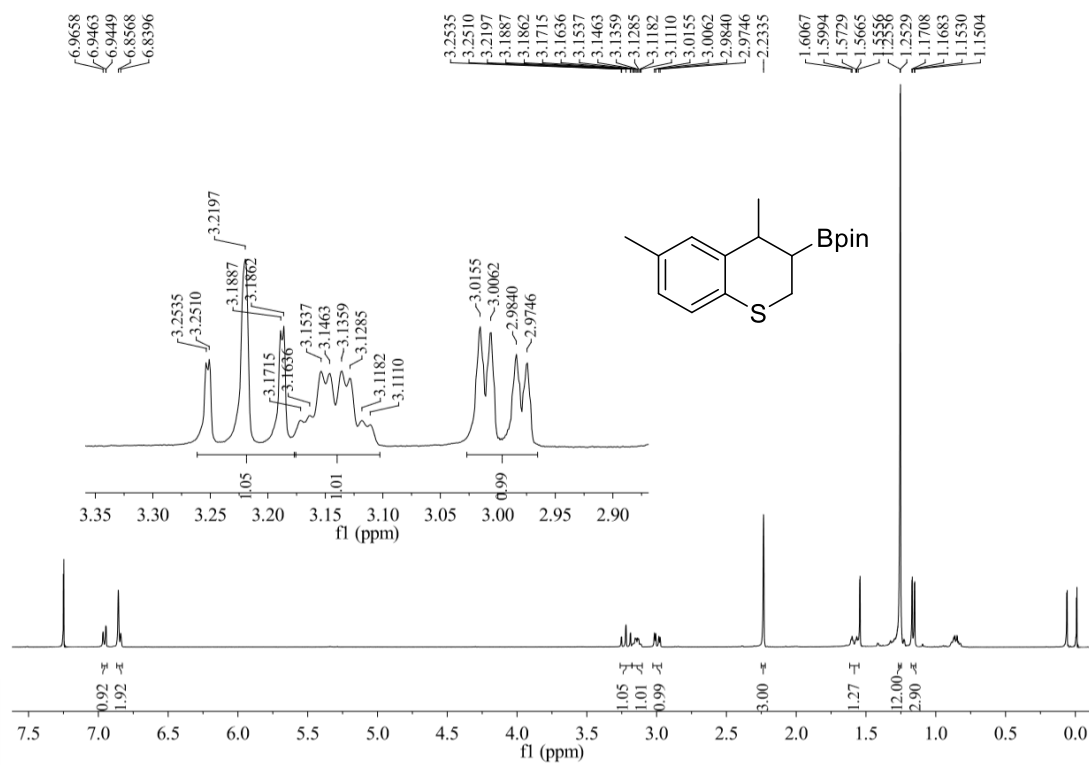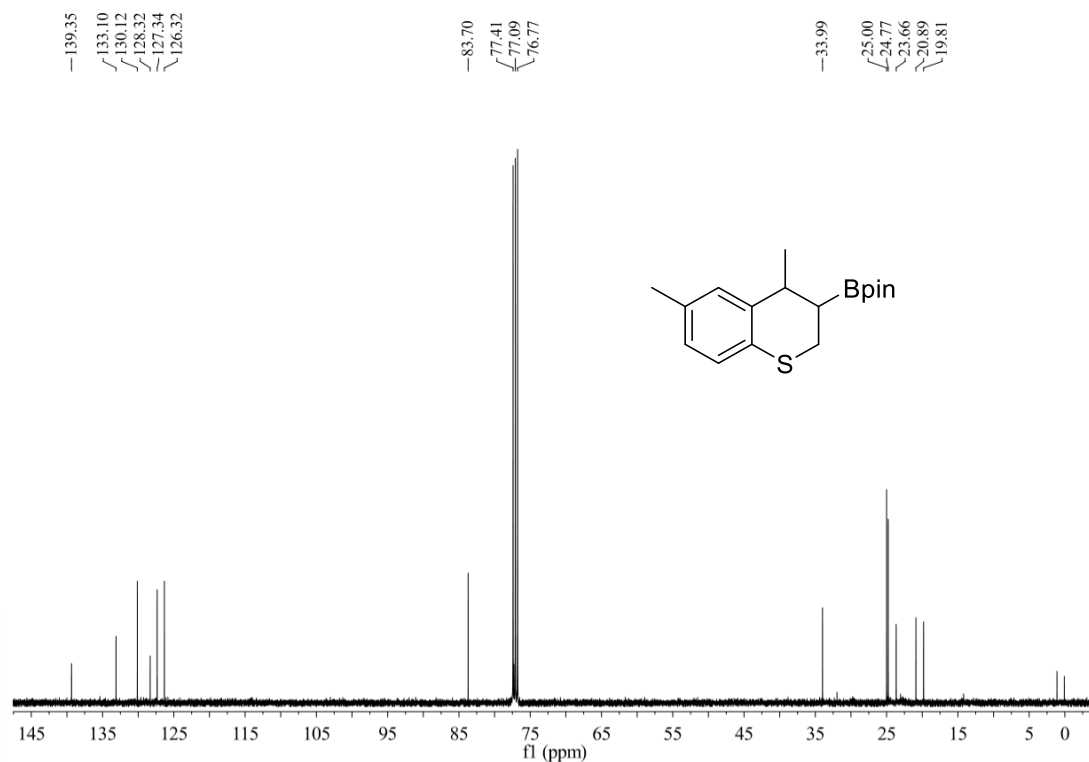

### 4-methyl-8-phenylchroman-3-ol (5)

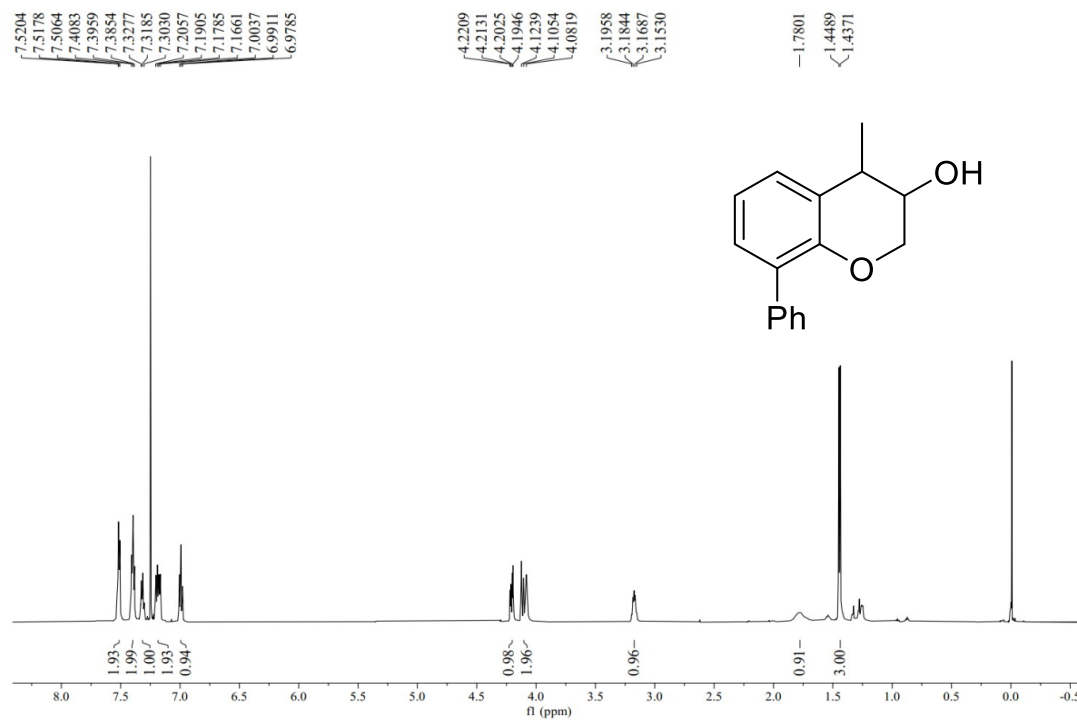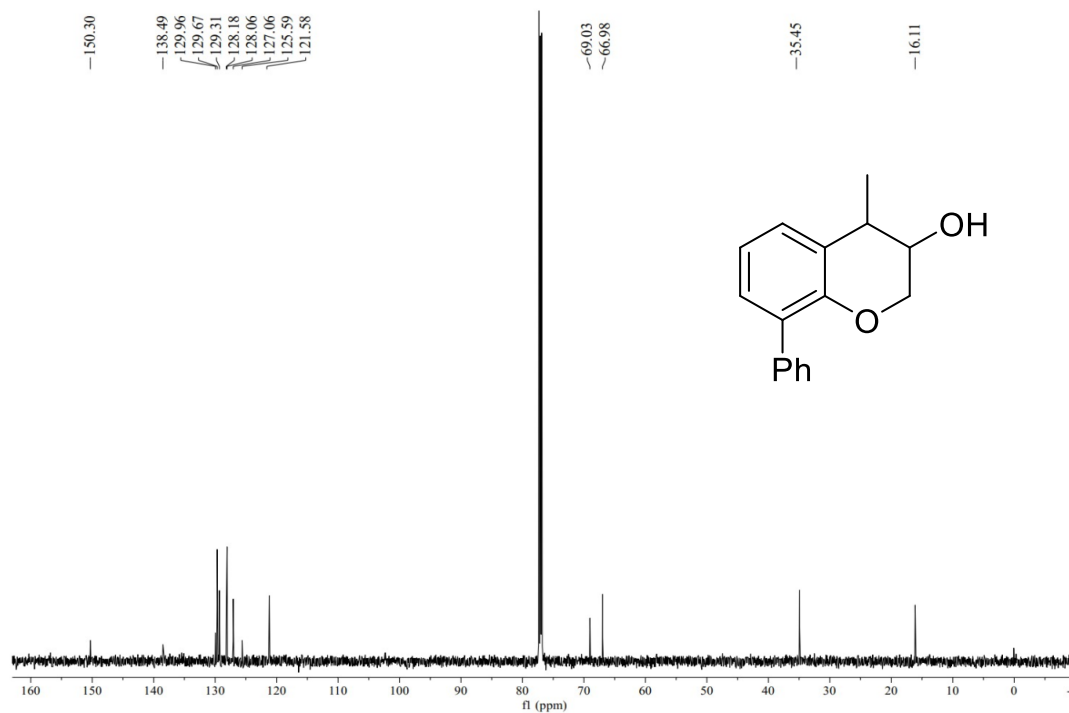

**3-(furan-2-yl)-4-methyl-8-phenylchromane (6)**

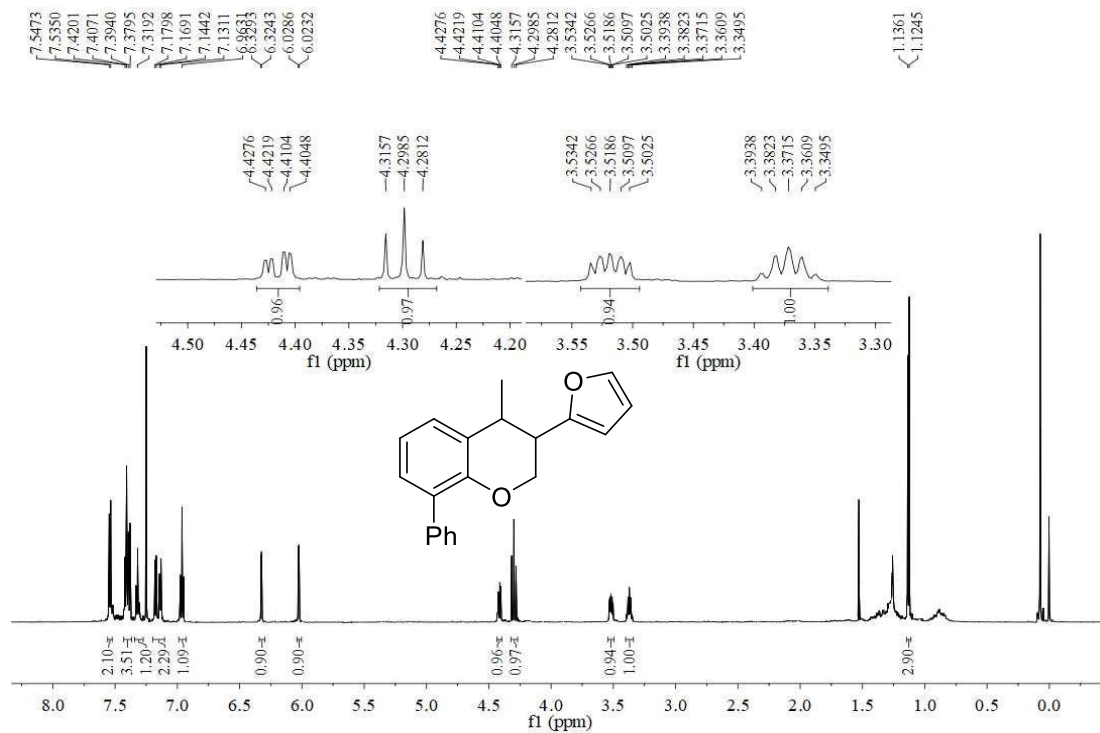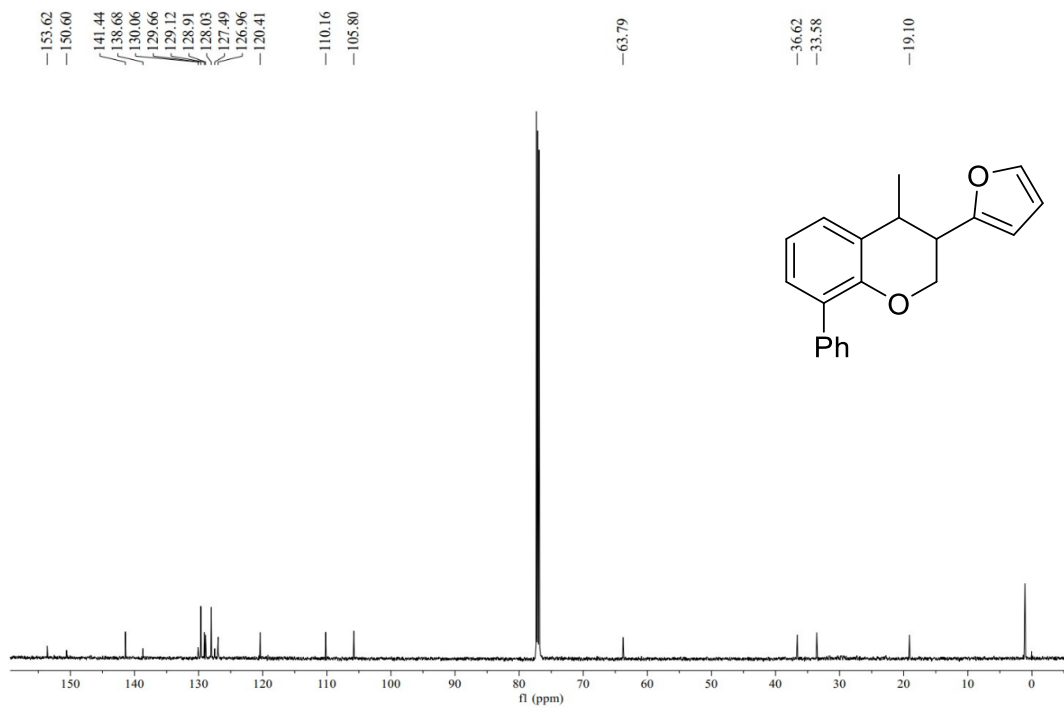

7-bromo-4-methylchroman-3-ol (7)

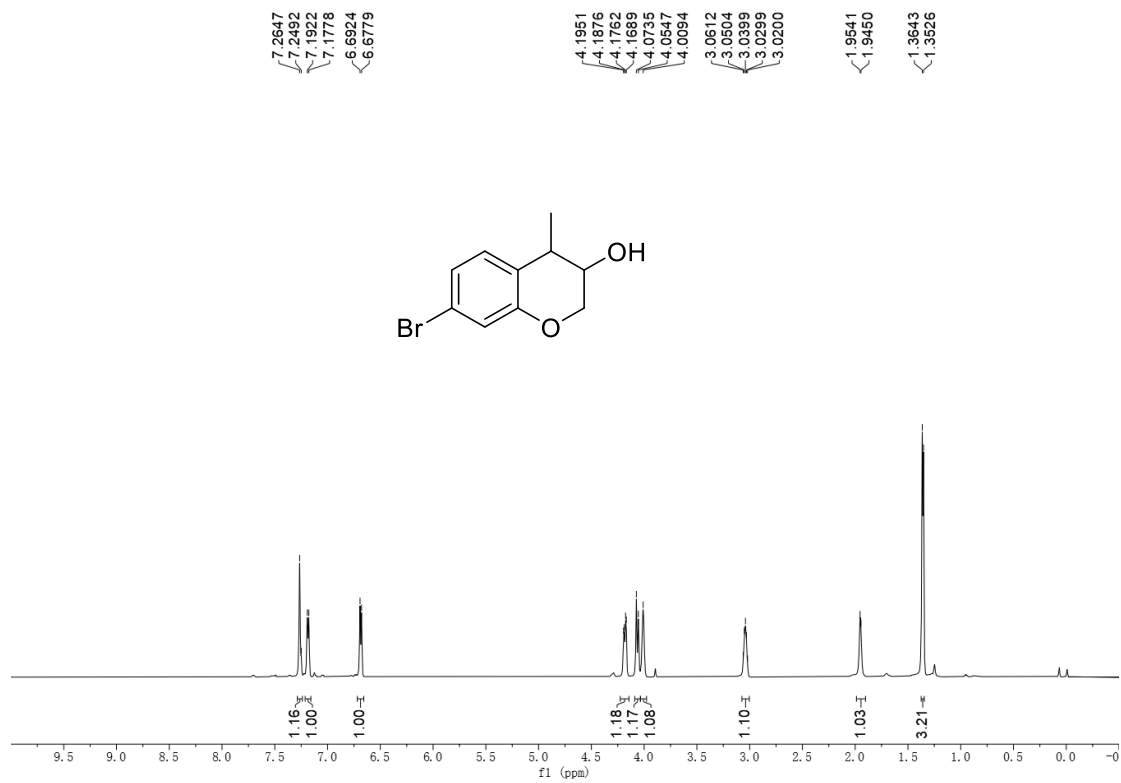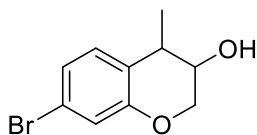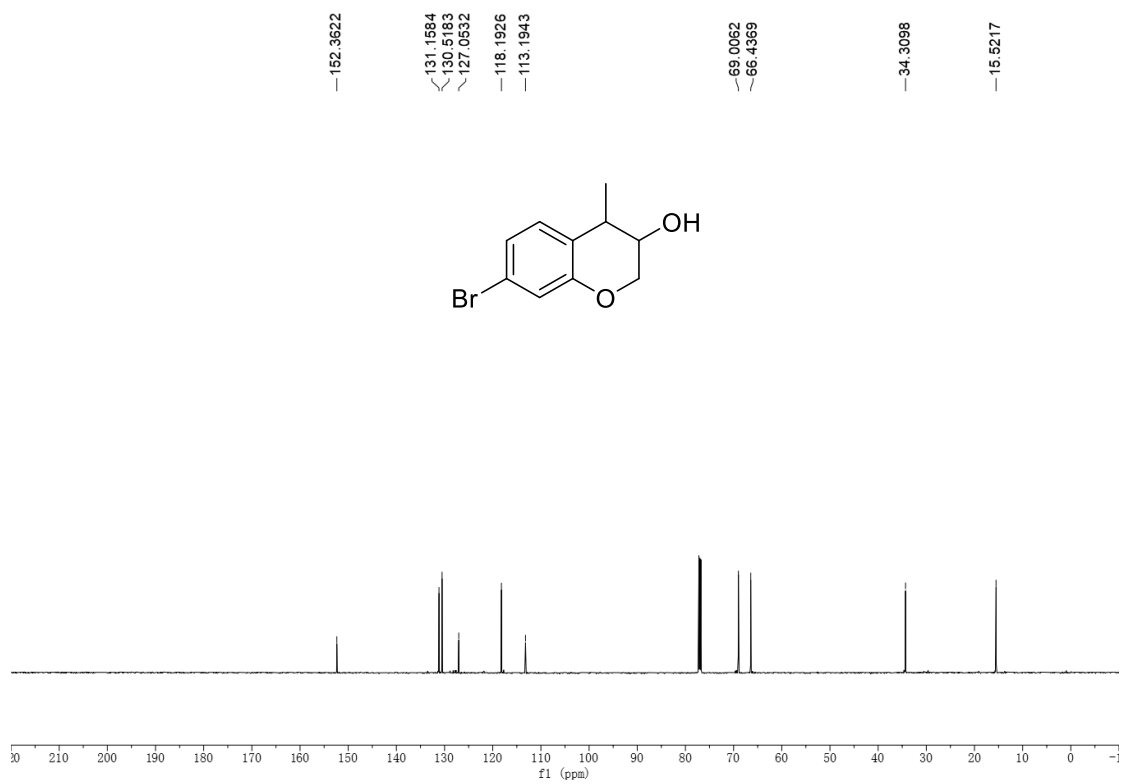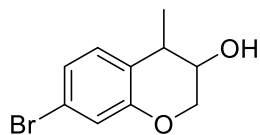



7-bromo-4-methylchroman-3-yl methanesulfonate (8)

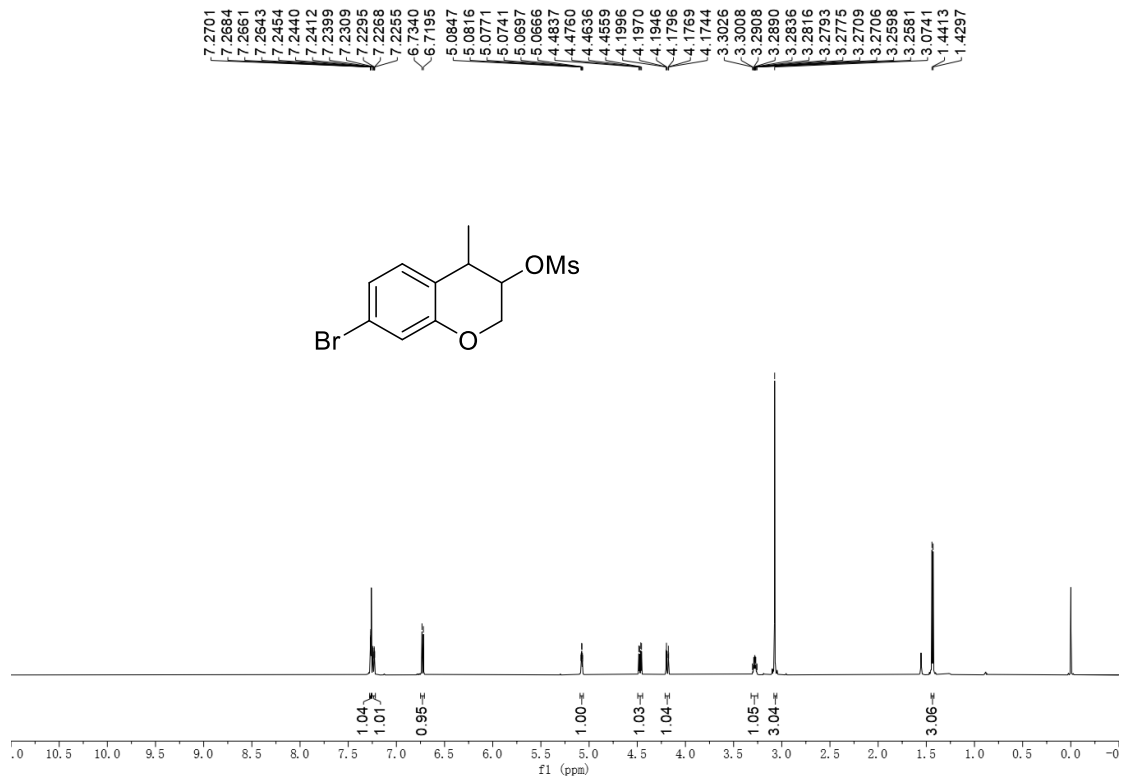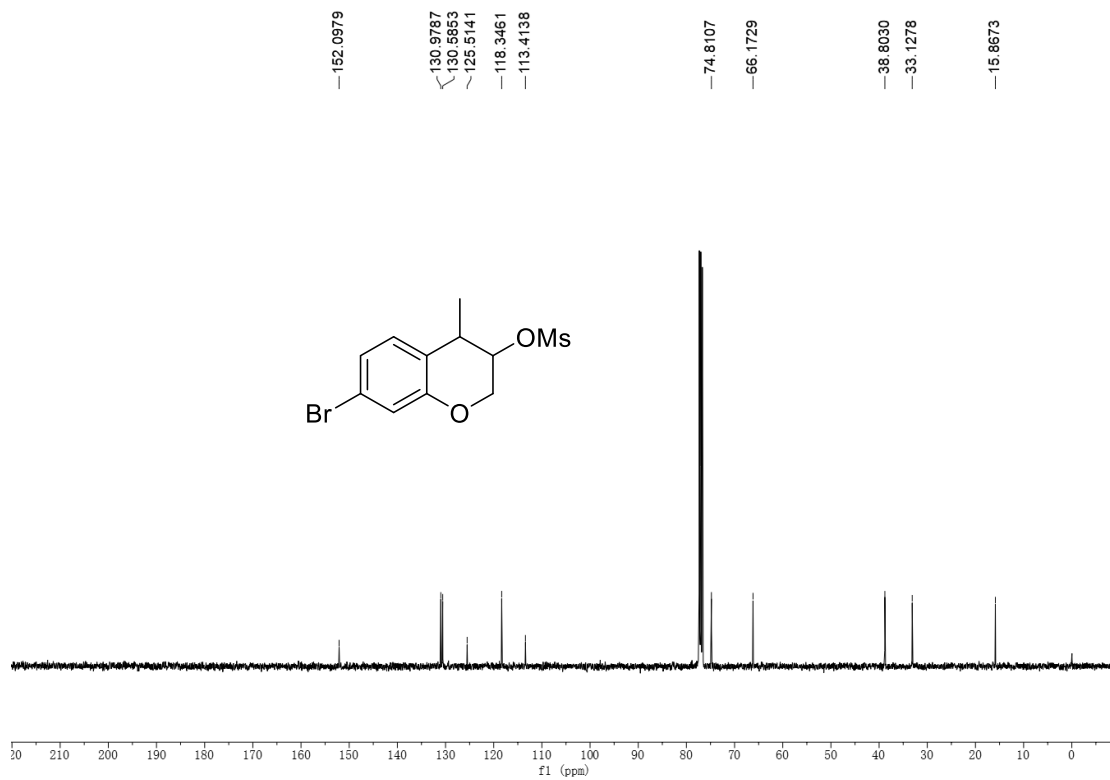

7-bromo-4-methylchroman-3-yl 4-methylbenzenesulfonate (9)

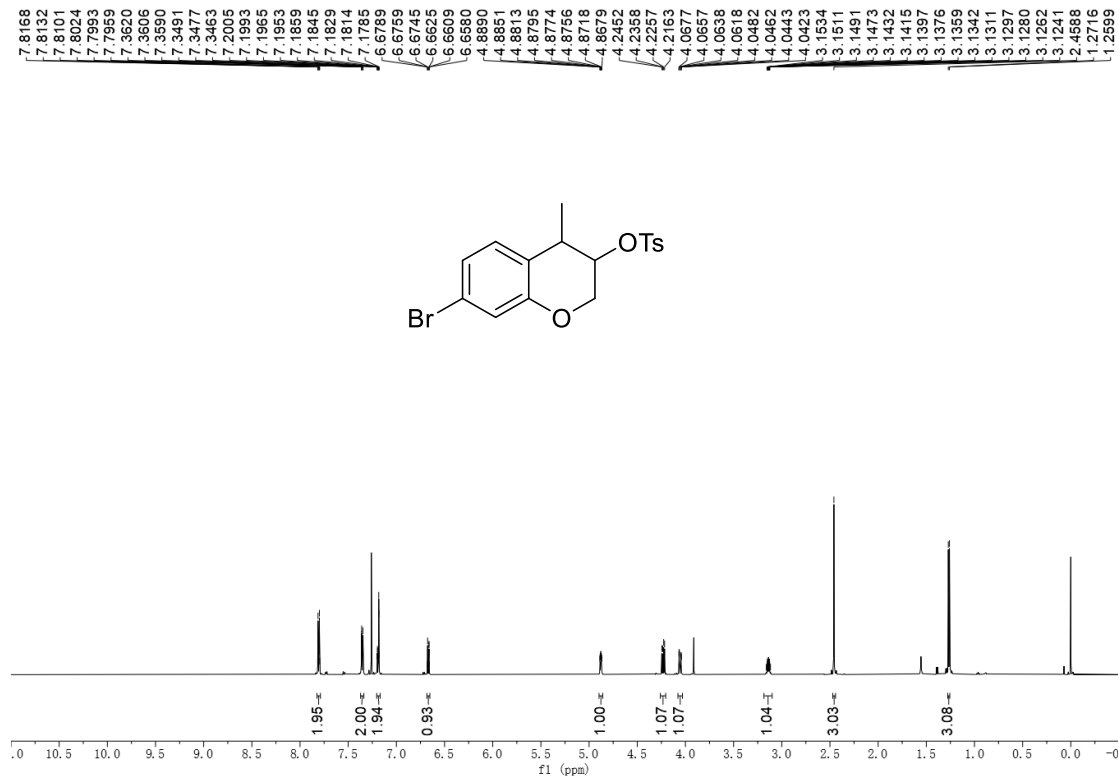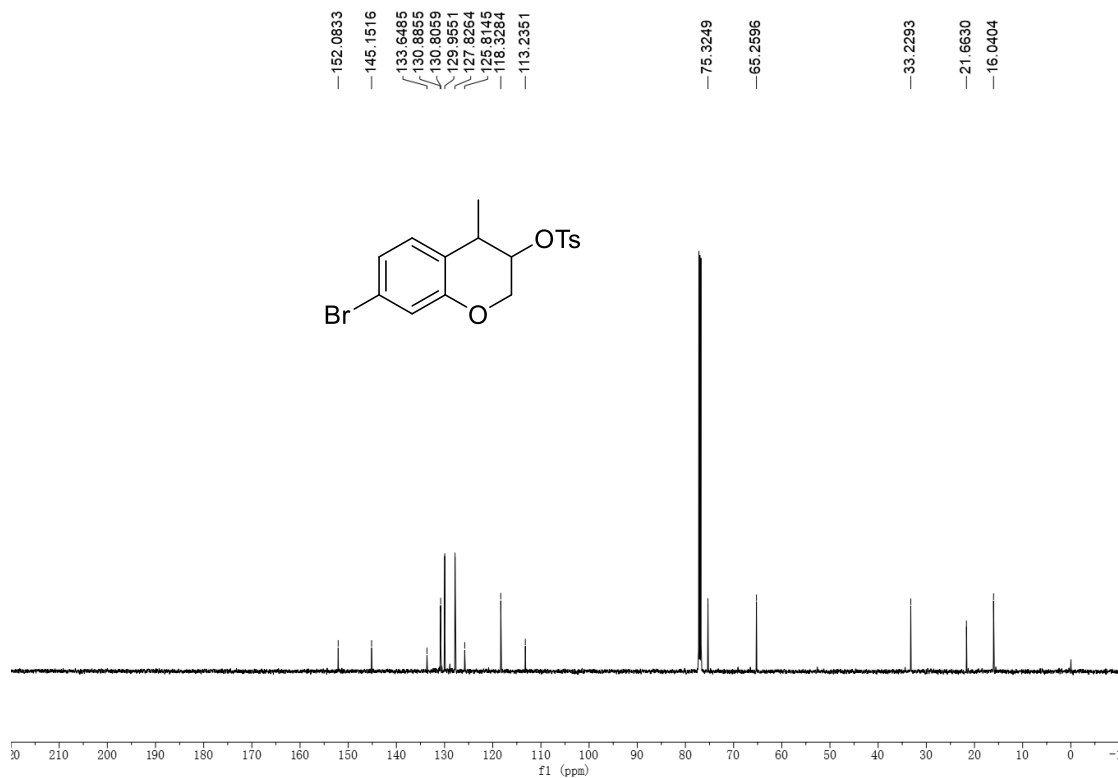

## 9. SFC and HPLC spectra of all compounds

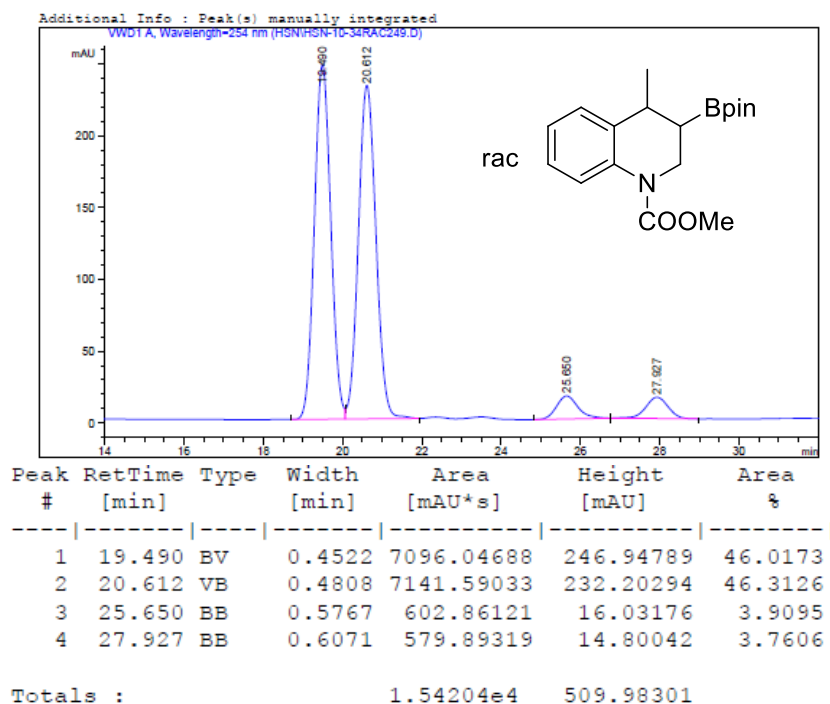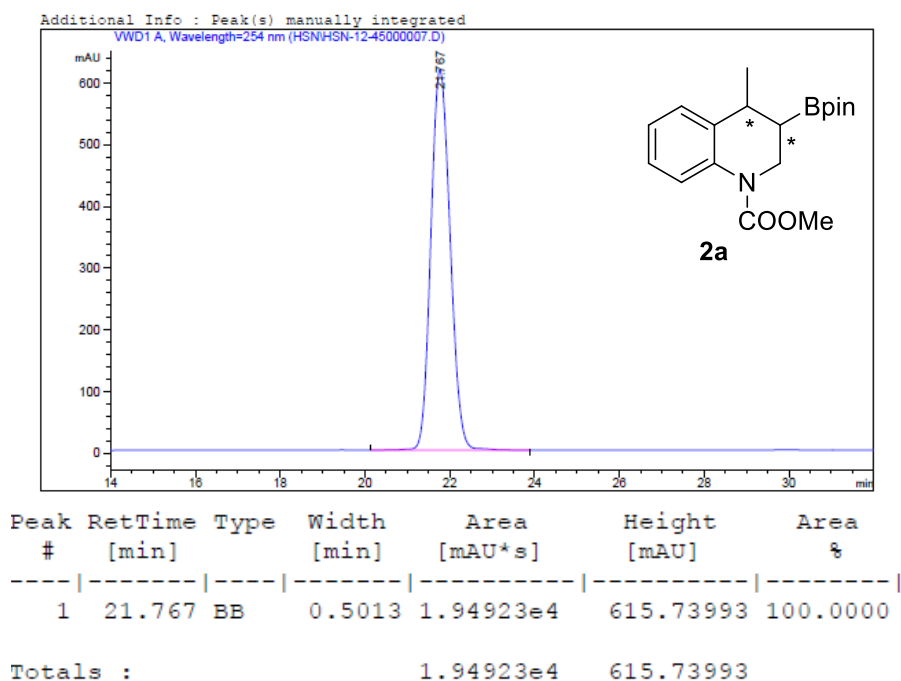

Additional Info : Peak(s) manually integrated

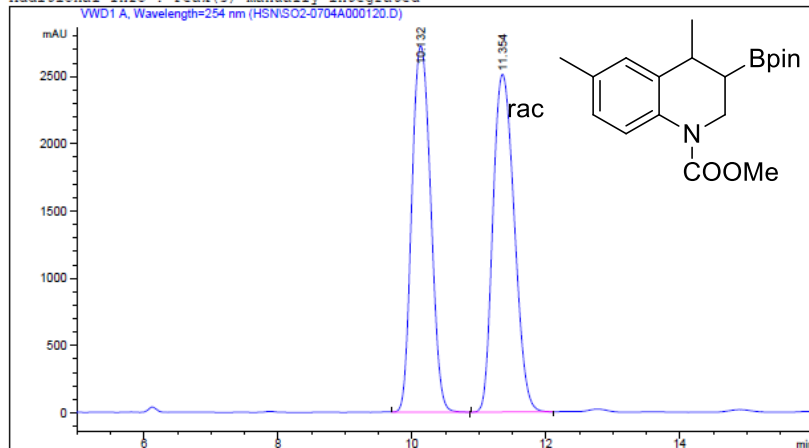

| Peak # | RetTime [min] | Type | Width [min] | Area [mAU*s] | Height [mAU] | Area %  |
|--------|---------------|------|-------------|--------------|--------------|---------|
| 1      | 10.132        | VB   | 0.3170      | 5.32458e4    | 2723.98438   | 48.9623 |
| 2      | 11.354        | BB   | 0.3570      | 5.55028e4    | 2509.89307   | 51.0377 |

Totals : 1.08749e5 5233.87744

Additional Info : Peak(s) manually integrated

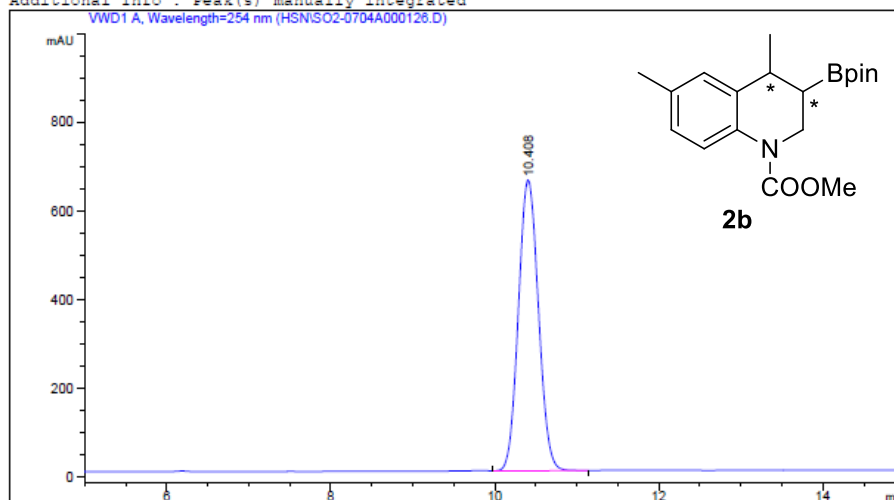

| Peak # | RetTime [min] | Type | Width [min] | Area [mAU*s] | Height [mAU] | Area %   |
|--------|---------------|------|-------------|--------------|--------------|----------|
| 1      | 10.408        | VB   | 0.2668      | 1.11151e4    | 655.44049    | 100.0000 |

Totals : 1.11151e4 655.44049

Additional Info : Peak(s) manually integrated

MWD1 B, Sig=254.4 Ref=off (HSN2018-12-2517-20-04HSN-13-43RAC.D)

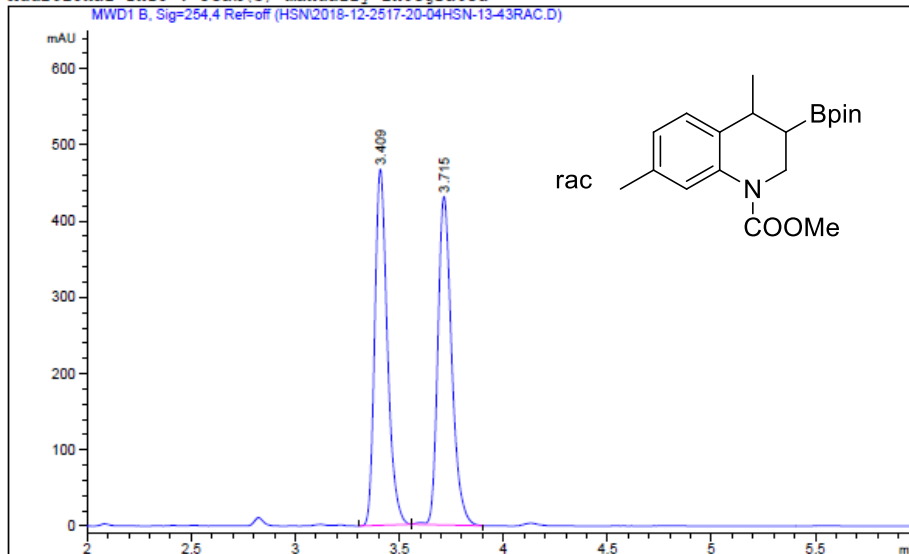

| Peak # | RetTime [min] | Type | Width [min] | Area [mAU*s] | Height [mAU] | Area %  |
|--------|---------------|------|-------------|--------------|--------------|---------|
| 1      | 3.409         | BB   | 0.0641      | 1967.26648   | 467.29135    | 49.6653 |
| 2      | 3.715         | VB R | 0.0708      | 1993.78064   | 431.16693    | 50.3347 |

Totals : 3961.04712 898.45828

Additional Info : Peak(s) manually integrated

MWD1 B, Sig=254.4 Ref=off (HSN2018-12-2517-08-29HSN-13-55.D)

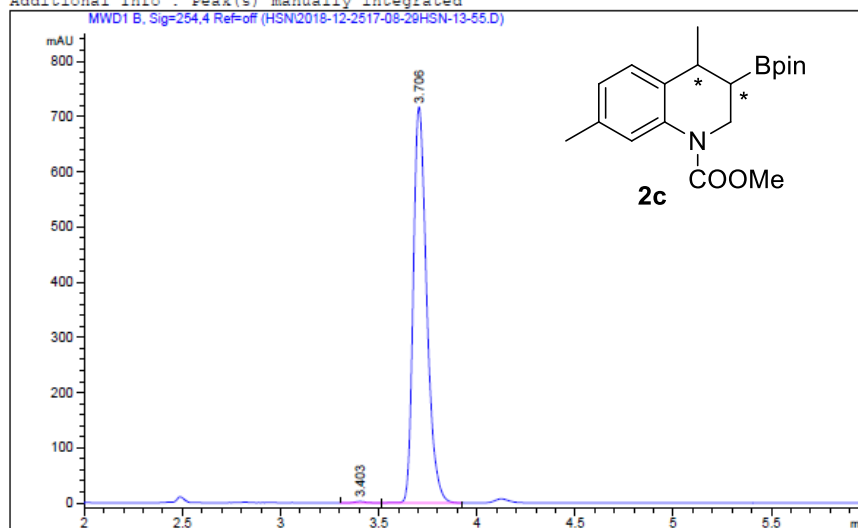

| Peak # | RetTime [min] | Type | Width [min] | Area [mAU*s] | Height [mAU] | Area %  |
|--------|---------------|------|-------------|--------------|--------------|---------|
| 1      | 3.403         | VV R | 0.0557      | 10.95594     | 2.59779      | 0.3205  |
| 2      | 3.706         | VB R | 0.0734      | 3407.81396   | 717.38831    | 99.6795 |

Totals : 3418.76990 719.98609

Additional Info : Peak(s) manually integrated

MWD1 B, Sig=254.4 Ref=off (HSN2019-01-0516-22-05HSN-13-64RAC.D)

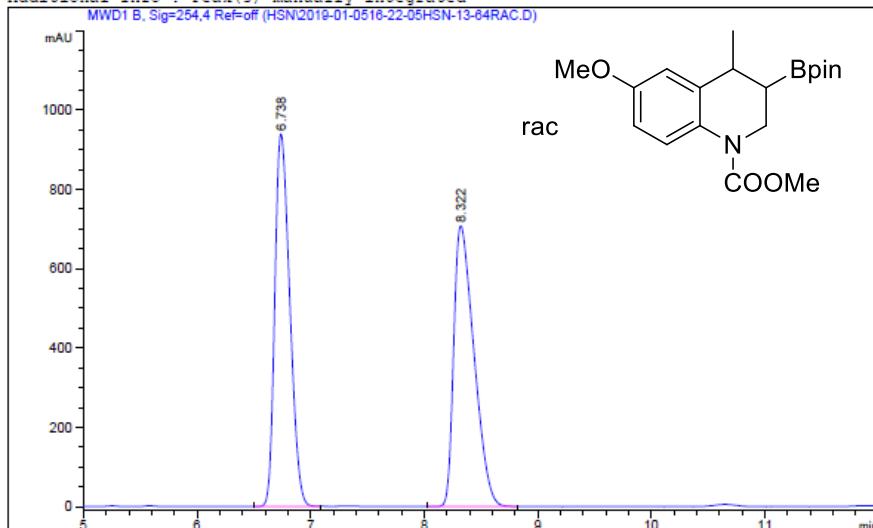

| Peak # | RetTime [min] | Type | Width [min] | Area [mAU*s] | Height [mAU] | Area %  |
|--------|---------------|------|-------------|--------------|--------------|---------|
| 1      | 6.738         | VV R | 0.1416      | 8583.16992   | 939.13159    | 49.5430 |
| 2      | 8.322         | VV R | 0.1817      | 8741.52637   | 707.00177    | 50.4570 |

Totals : 1.73247e4 1646.13336

Additional Info : Peak(s) manually integrated

MWD1 B, Sig=254.4 Ref=off (HSN2019-01-0518-37-51HSN-13-68.D)

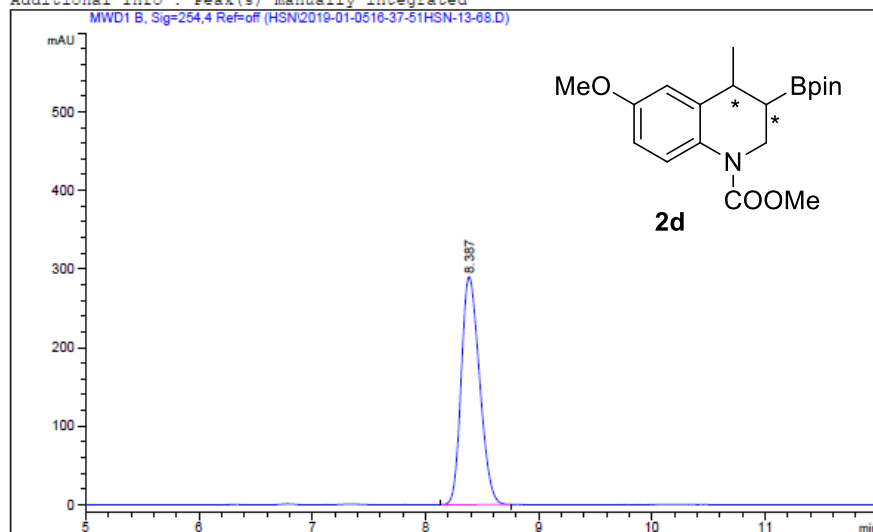

| Peak # | RetTime [min] | Type | Width [min] | Area [mAU*s] | Height [mAU] | Area %   |
|--------|---------------|------|-------------|--------------|--------------|----------|
| 1      | 8.387         | VV R | 0.1688      | 3248.86035   | 289.86234    | 100.0000 |

Totals : 3248.86035 289.86234

Additional Info : Peak(s) manually integrated

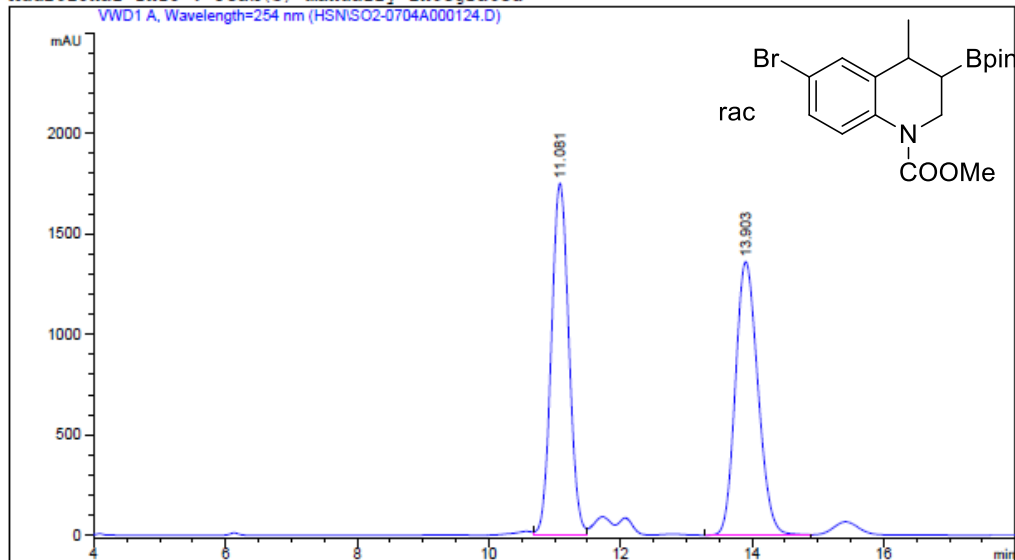

| Peak # | RetTime [min] | Type | Width [min] | Area [mAU*s] | Height [mAU] | Area %  |
|--------|---------------|------|-------------|--------------|--------------|---------|
| 1      | 11.081        | VV   | 0.2889      | 3.22400e4    | 1750.36707   | 49.8933 |
| 2      | 13.903        | BV   | 0.3716      | 3.23779e4    | 1360.56140   | 50.1067 |

Totals : 6.46179e4 3110.92847

Additional Info : Peak(s) manually integrated

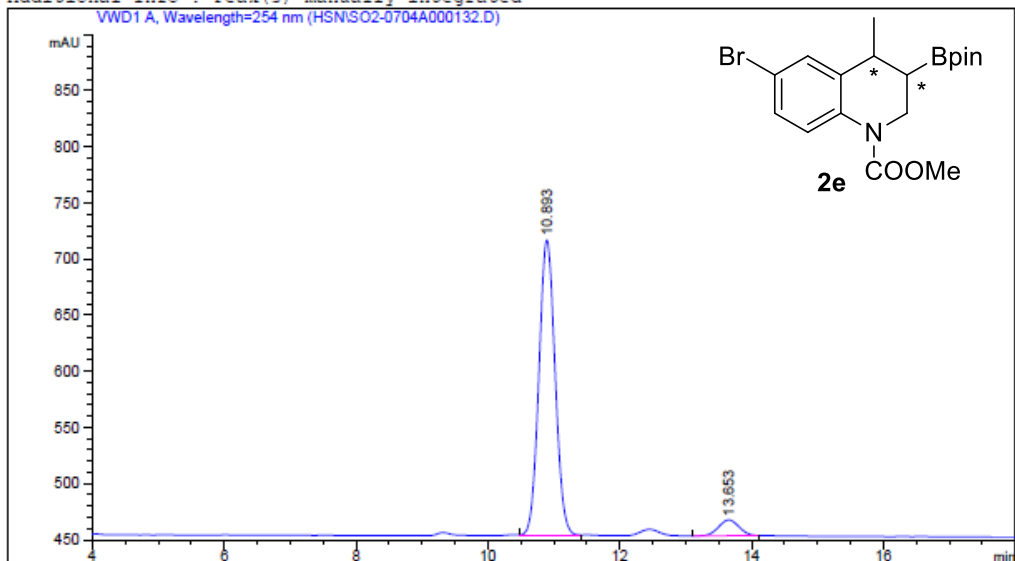

| Peak # | RetTime [min] | Type | Width [min] | Area [mAU*s] | Height [mAU] | Area %  |
|--------|---------------|------|-------------|--------------|--------------|---------|
| 1      | 10.893        | VV   | 0.2665      | 4506.07031   | 263.50348    | 93.7045 |
| 2      | 13.653        | BB   | 0.3367      | 302.73715    | 14.08760     | 6.2955  |

Totals : 4808.80746 277.59108

Additional Info : Peak(s) manually integrated  
MWD1 B, Sig=254.4 Ref=off (HSN2018-12-2515-53-16HSN-13-60rac.D)

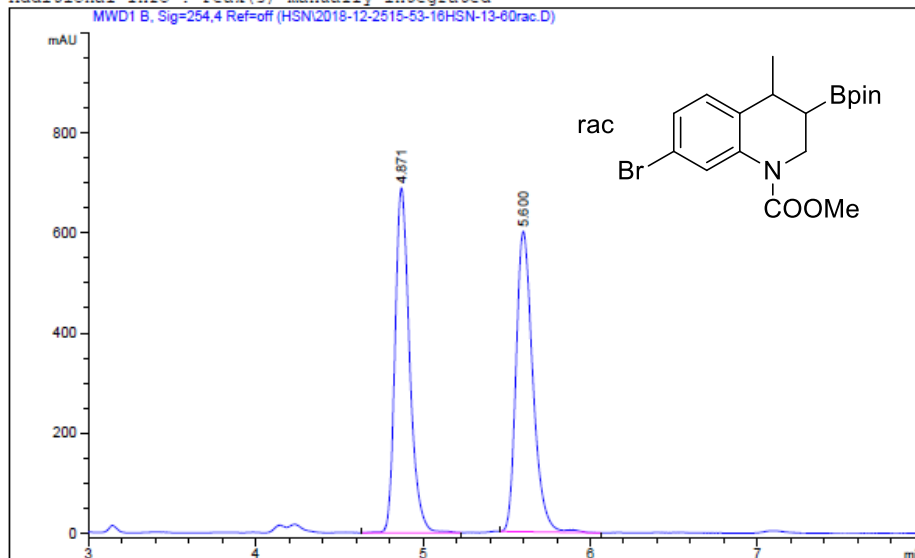

| Peak # | RetTime [min] | Type | Width [min] | Area [mAU*s] | Height [mAU] | Area %  |
|--------|---------------|------|-------------|--------------|--------------|---------|
| 1      | 4.871         | VV R | 0.0920      | 4161.81787   | 688.53729    | 49.8915 |
| 2      | 5.600         | BV R | 0.1077      | 4179.91504   | 599.77081    | 50.1085 |

Totals : 8341.73291 1288.30811

Additional Info : Peak(s) manually integrated  
MWD1 B, Sig=254.4 Ref=off (HSN2019-01-0722-27-55HSN-13-65.D)

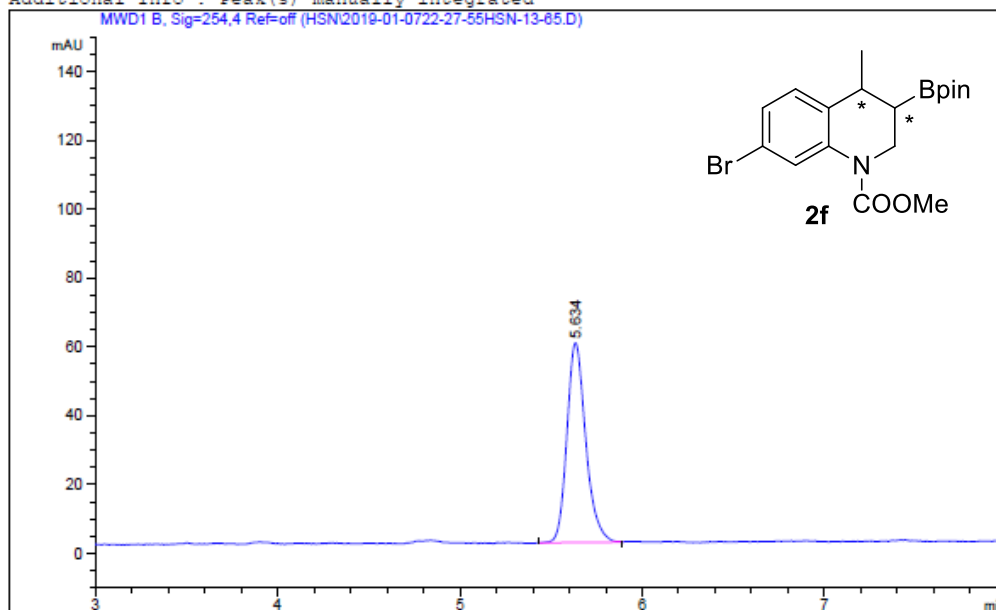

| Peak # | RetTime [min] | Type | Width [min] | Area [mAU*s] | Height [mAU] | Area %   |
|--------|---------------|------|-------------|--------------|--------------|----------|
| 1      | 5.634         | VV R | 0.1034      | 416.64581    | 57.93616     | 100.0000 |

Totals : 416.64581 57.93616



Additional Info : Peak(s) manually integrated  
 MWD1 B, Sig=254.4 Ref=off (HSN2018-12-2515-28-34HSN-13-57-2rac.D)

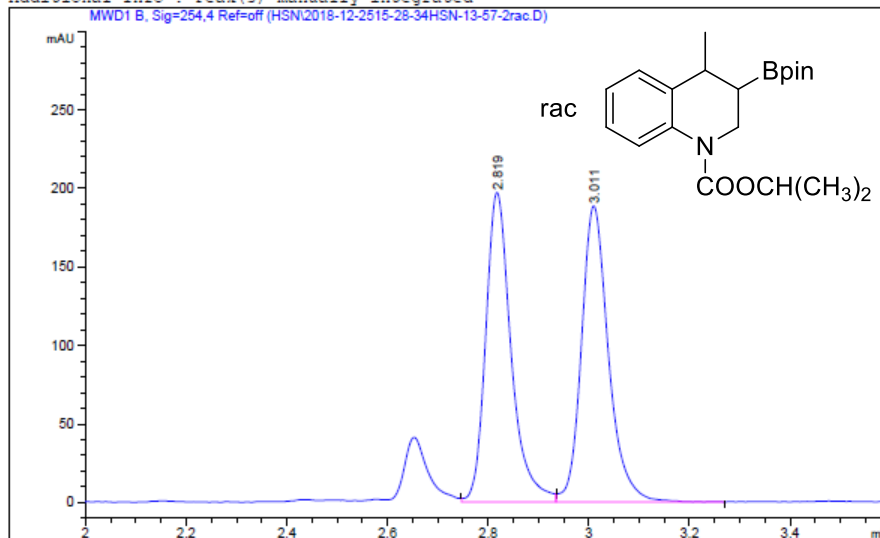

| Peak # | RetTime [min] | Type | Width [min] | Area [mAU*s] | Height [mAU] | Area %  |
|--------|---------------|------|-------------|--------------|--------------|---------|
| 1      | 2.819         | VV   | 0.0531      | 693.16724    | 196.58324    | 49.4931 |
| 2      | 3.011         | VB   | 0.0579      | 707.36676    | 188.03195    | 50.5069 |

Totals : 1400.53400 384.61519

Additional Info : Peak(s) manually integrated  
 MWD1 B, Sig=254.4 Ref=off (HSN2018-12-2718-19-41HSN-13-81.D)

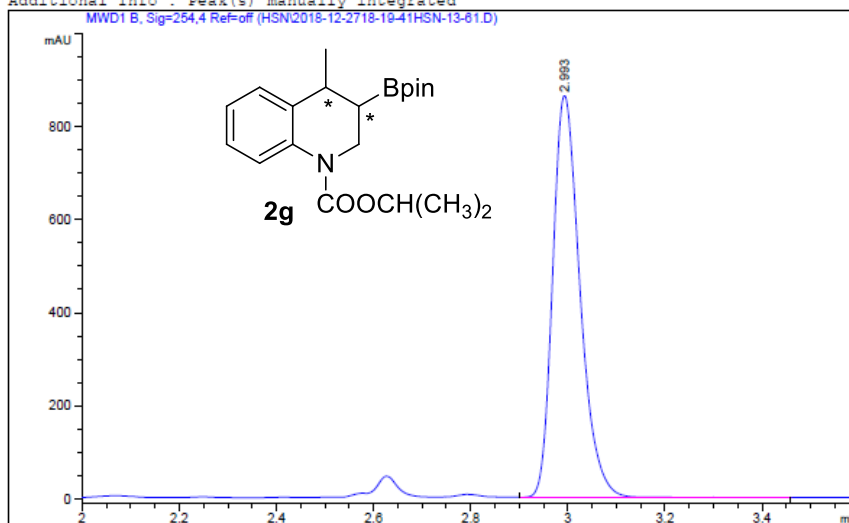

| Peak # | RetTime [min] | Type | Width [min] | Area [mAU*s] | Height [mAU] | Area %   |
|--------|---------------|------|-------------|--------------|--------------|----------|
| 1      | 2.993         | VB   | 0.0616      | 3372.90039   | 862.29388    | 100.0000 |

Totals : 3372.90039 862.29388

Additional Info : Peak(s) manually integrated  
 MWD1 B, Sig=254,4 Ref=off (HSN2018-12-2610-51-57HSN-13-56rac.D)

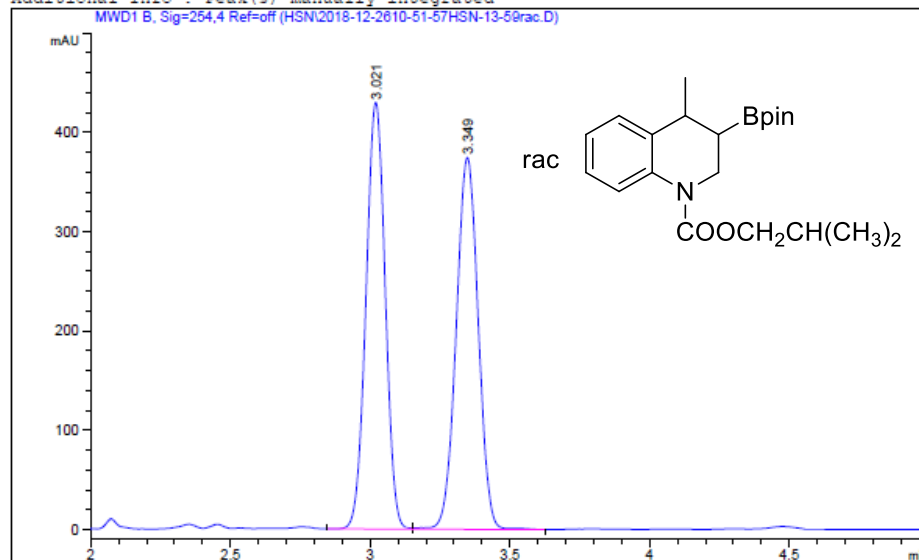

| Peak # | RetTime [min] | Type | Width [min] | Area [mAU*s] | Height [mAU] | Area %  |
|--------|---------------|------|-------------|--------------|--------------|---------|
| 1      | 3.021         | BV   | 0.0759      | 2054.07251   | 429.06149    | 50.0031 |
| 2      | 3.349         | VB   | 0.0861      | 2053.82007   | 374.08072    | 49.9969 |

Totals : 4107.89258 803.14221

Additional Info : Peak(s) manually integrated  
 MWD1 B, Sig=254,4 Ref=off (HSN2018-12-2718-32-40HSN-13-62.D)

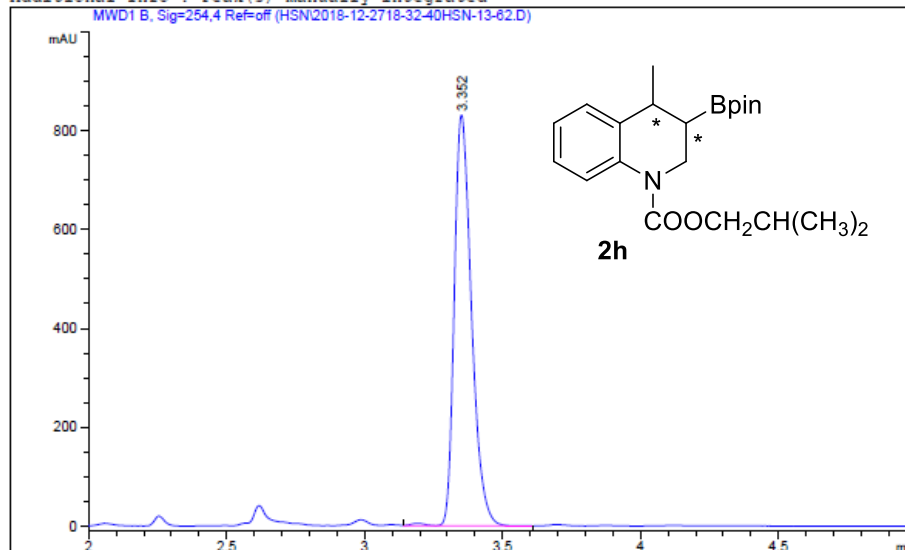

| Peak # | RetTime [min] | Type | Width [min] | Area [mAU*s] | Height [mAU] | Area %   |
|--------|---------------|------|-------------|--------------|--------------|----------|
| 1      | 3.352         | VB R | 0.0666      | 3618.77612   | 829.69946    | 100.0000 |

Totals : 3618.77612 829.69946

Additional Info : Peak(s) manually integrated  
 MWD1 B, Sig=254.4 Ref=off (HSN2018-12-2517-30-41HSN-13-45RAC.D)

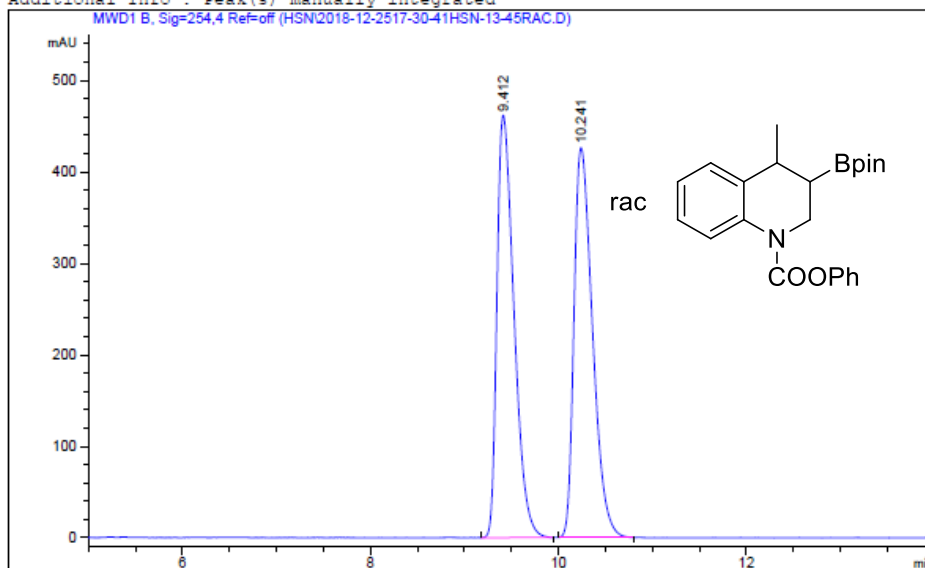

| Peak # | RetTime [min] | Type | Width [min] | Area [mAU*s] | Height [mAU] | Area %  |
|--------|---------------|------|-------------|--------------|--------------|---------|
| 1      | 9.412         | VV R | 0.1877      | 5805.60254   | 461.68948    | 49.9270 |
| 2      | 10.241        | VV R | 0.2019      | 5822.57666   | 426.09579    | 50.0730 |

Totals : 1.16282e4 887.78528

Additional Info : Peak(s) manually integrated  
 MWD1 B, Sig=254.4 Ref=off (HSN2018-12-2518-05-57HSN-13-56.D)

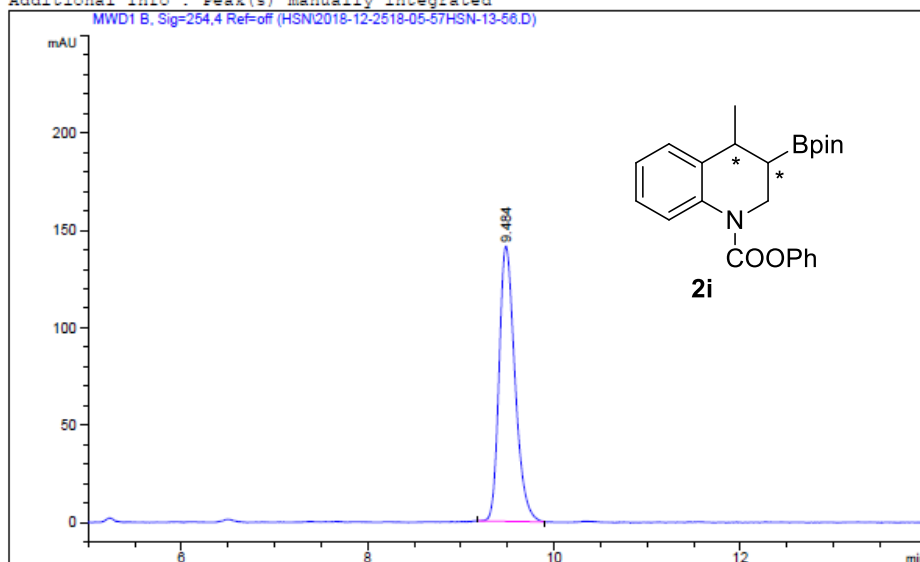

| Peak # | RetTime [min] | Type | Width [min] | Area [mAU*s] | Height [mAU] | Area %   |
|--------|---------------|------|-------------|--------------|--------------|----------|
| 1      | 9.484         | VV R | 0.1749      | 1668.71838   | 141.13956    | 100.0000 |

Totals : 1668.71838 141.13956

Additional Info : Peak(s) manually integrated  
MWD1 B, Sig=254.4 Ref=off (HSN2019-02-1915-03-00HSN-14-10.D)

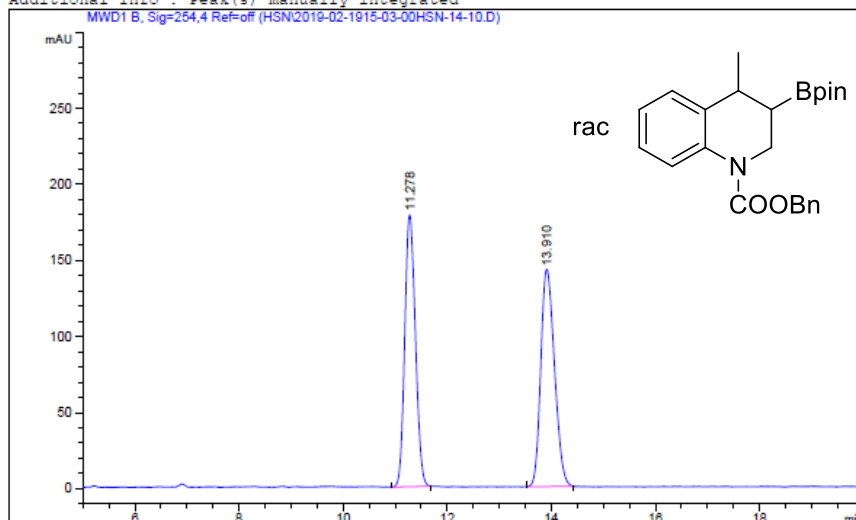

| Peak # | RetTime [min] | Type | Width [min] | Area [mAU*s] | Height [mAU] | Area %  |
|--------|---------------|------|-------------|--------------|--------------|---------|
| 1      | 11.278        | VV R | 0.2023      | 2536.70386   | 178.53922    | 49.3008 |
| 2      | 13.910        | VV R | 0.2196      | 2608.66162   | 142.82715    | 50.6992 |

Totals : 5145.36548 321.36636

Additional Info : Peak(s) manually integrated  
MWD1 B, Sig=254.4 Ref=off (HSN2019-02-1915-26-48HSN-14-9.D)

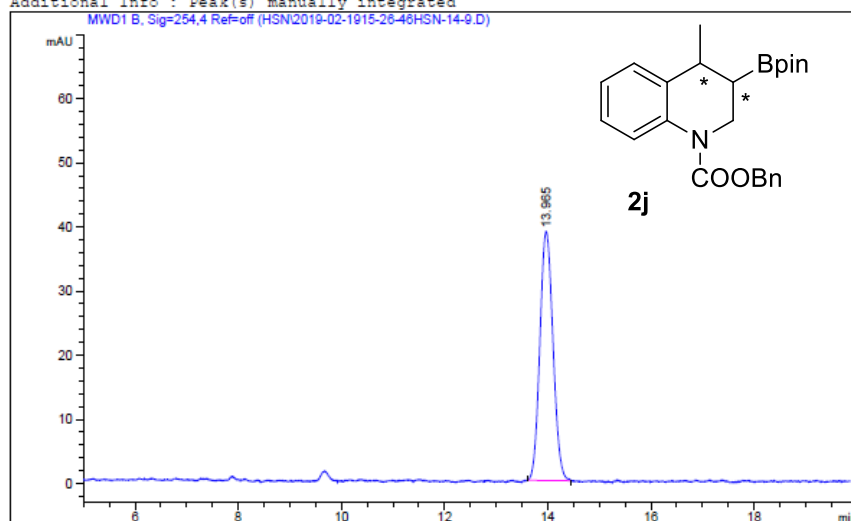

| Peak # | RetTime [min] | Type | Width [min] | Area [mAU*s] | Height [mAU] | Area %   |
|--------|---------------|------|-------------|--------------|--------------|----------|
| 1      | 13.965        | VV R | 0.2102      | 685.51874    | 38.87386     | 100.0000 |

Totals : 685.51874 38.87386

Additional Info : Peak(s) manually integrated  
 MWD1 B, Sig=254,4 Ref=off (HSN2018-10-1209-16-54HSN-13-3RAC.D)

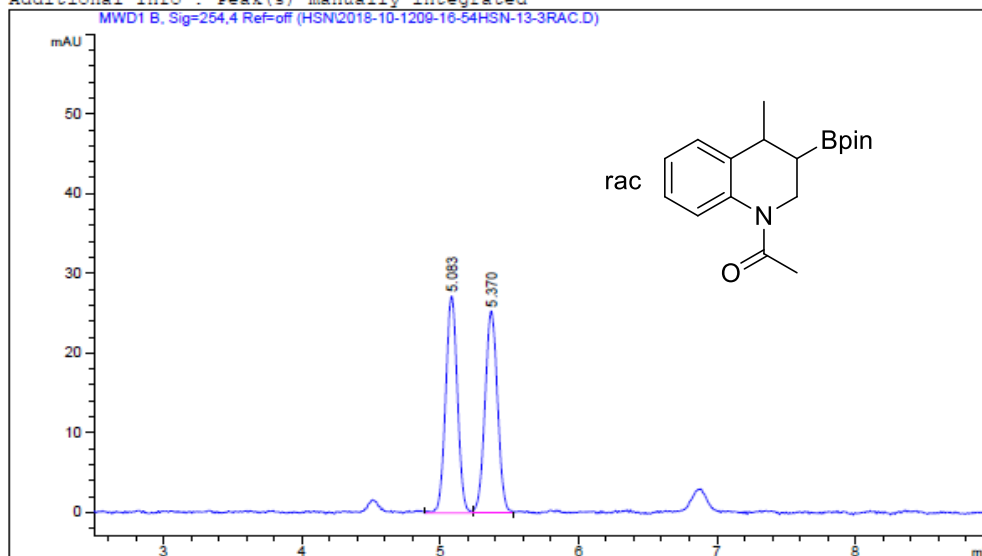

| Peak # | RetTime [min] | Type | Width [min] | Area [mAU*s] | Height [mAU] | Area %  |
|--------|---------------|------|-------------|--------------|--------------|---------|
| 1      | 5.083         | VV R | 0.0920      | 160.83246    | 27.20071     | 50.3413 |
| 2      | 5.370         | VV R | 0.0910      | 158.65140    | 25.34509     | 49.6587 |

Totals : 319.48386 52.54580

Additional Info : Peak(s) manually integrated  
 MWD1 B, Sig=254,4 Ref=off (HSN2019-01-1522-01-22HSN-14-1.D)

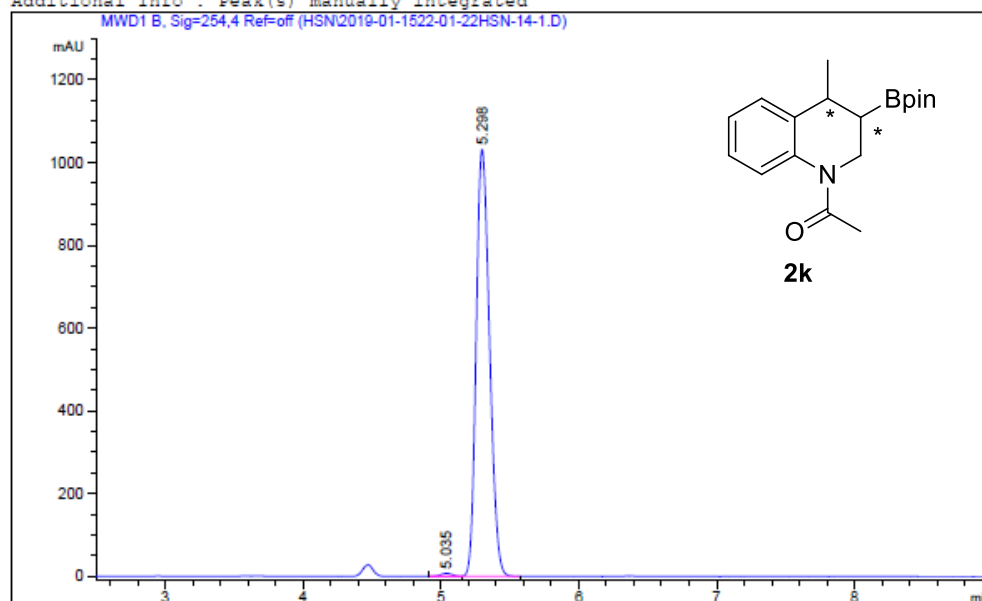

| Peak # | RetTime [min] | Type | Width [min] | Area [mAU*s] | Height [mAU] | Area %  |
|--------|---------------|------|-------------|--------------|--------------|---------|
| 1      | 5.035         | BV E | 0.0754      | 44.73246     | 7.40895      | 0.6396  |
| 2      | 5.298         | VV R | 0.1066      | 6948.83594   | 1031.88977   | 99.3604 |

Totals : 6993.56839 1039.29872

Additional Info : Peak(s) manually integrated

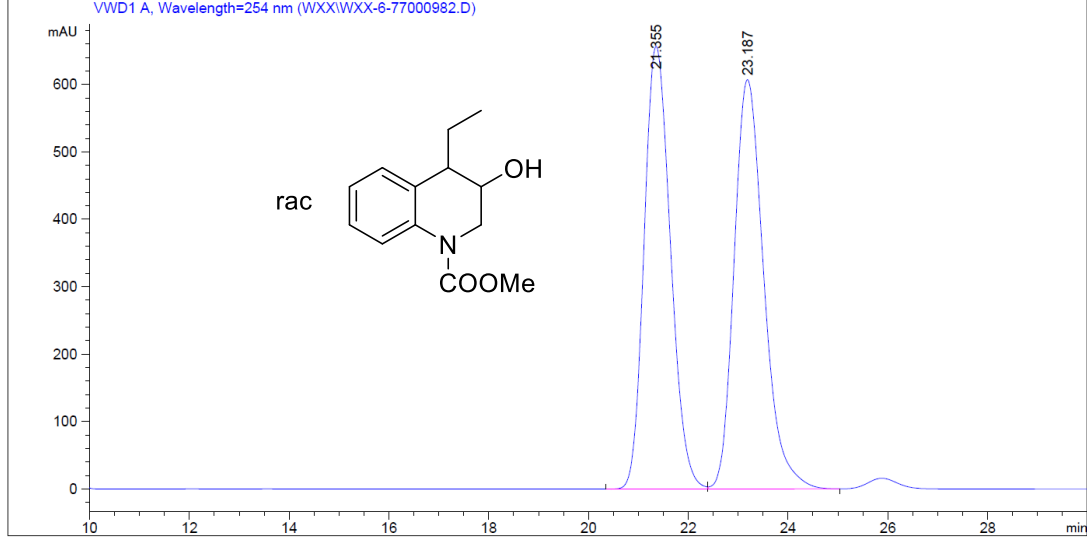

| Peak # | RetTime [min] | Type | Width [min] | Area [mAU*s] | Height [mAU] | Area %  |
|--------|---------------|------|-------------|--------------|--------------|---------|
| 1      | 21.355        | BV   | 0.5764      | 2.41219e4    | 656.84271    | 49.0314 |
| 2      | 23.187        | VB   | 0.6418      | 2.50749e4    | 607.23981    | 50.9686 |

Totals : 4.91968e4 1264.08252

Additional Info : Peak(s) manually integrated

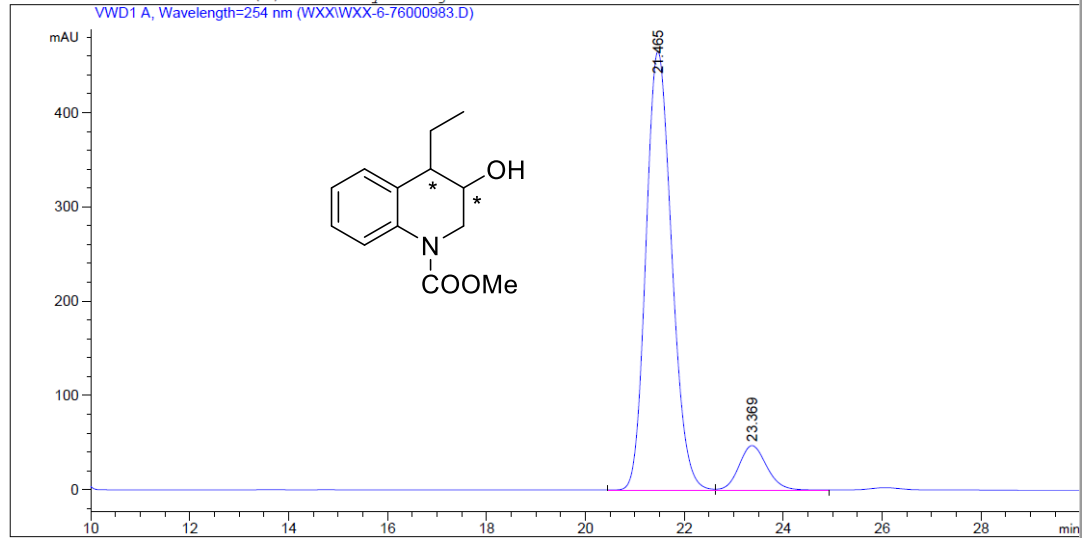

Signal 1: VWD1 A, Wavelength=254 nm

| Peak # | RetTime [min] | Type | Width [min] | Area [mAU*s] | Height [mAU] | Area %  |
|--------|---------------|------|-------------|--------------|--------------|---------|
| 1      | 21.465        | BV   | 0.5662      | 1.67908e4    | 465.05923    | 90.2056 |
| 2      | 23.369        | VB   | 0.6013      | 1823.11743   | 47.02920     | 9.7944  |

Totals : 1.86139e4 512.08844

Additional Info : Peak(s) manually integrated

MWD1 C, Sig=210.4 Ref=off (HSN2019-01-1209-11-35HSN-13-71RAC.D)

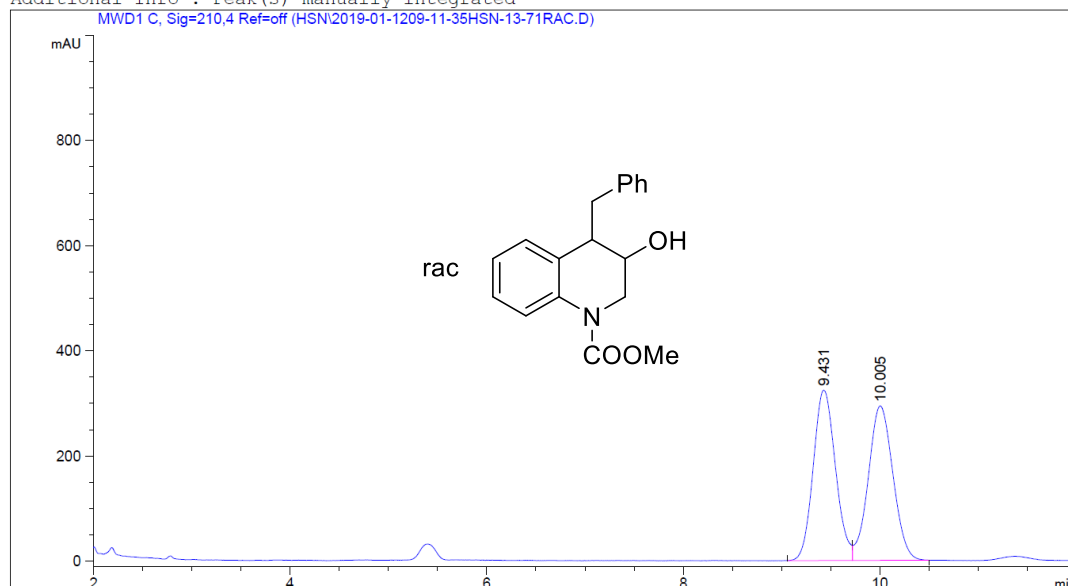

| Peak # | RetTime [min] | Type | Width [min] | Area [mAU*s] | Height [mAU] | Area %  |
|--------|---------------|------|-------------|--------------|--------------|---------|
| 1      | 9.431         | BV   | 0.2258      | 5100.64453   | 324.57666    | 49.8497 |
| 2      | 10.005        | VV R | 0.2411      | 5131.39355   | 294.10269    | 50.1503 |

Totals : 1.02320e4 618.67935

Additional Info : Peak(s) manually integrated

MWD1 C, Sig=210.4 Ref=off (HSN2019-01-1816-20-04HSN-14-6-2.2.D)

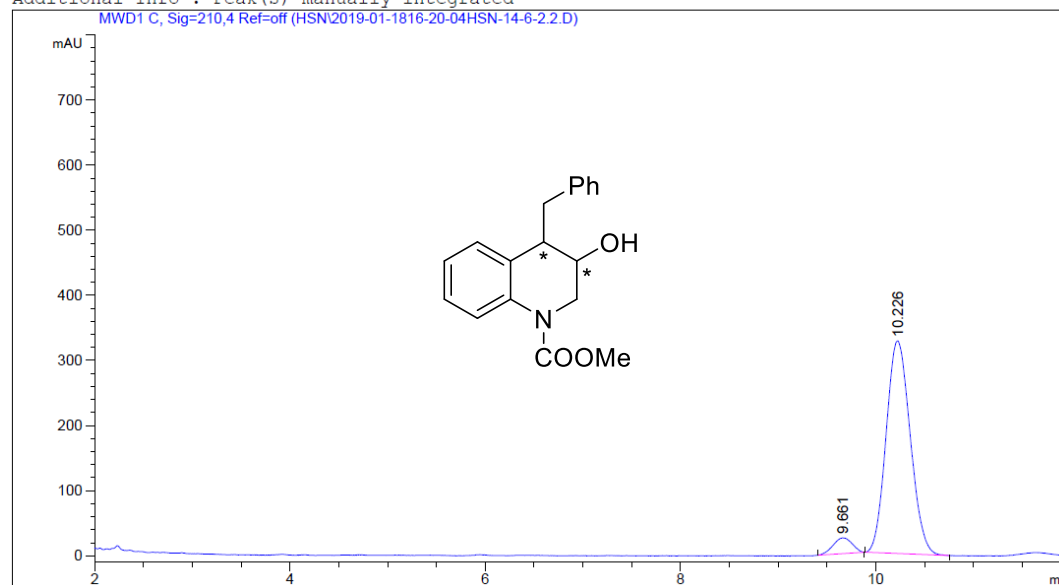

| Peak # | RetTime [min] | Type | Width [min] | Area [mAU*s] | Height [mAU] | Area %  |
|--------|---------------|------|-------------|--------------|--------------|---------|
| 1      | 9.661         | BB   | 0.1609      | 328.60941    | 24.36417     | 5.5535  |
| 2      | 10.226        | BB   | 0.2056      | 5588.53955   | 326.67313    | 94.4465 |

Totals : 5917.14896 351.03730

Additional Info : Peak(s) manually integrated  
 MWD1 D, Sig=230,4 Ref=off (SX2019-07-1915-35-10SX-1-65-RAC.D)

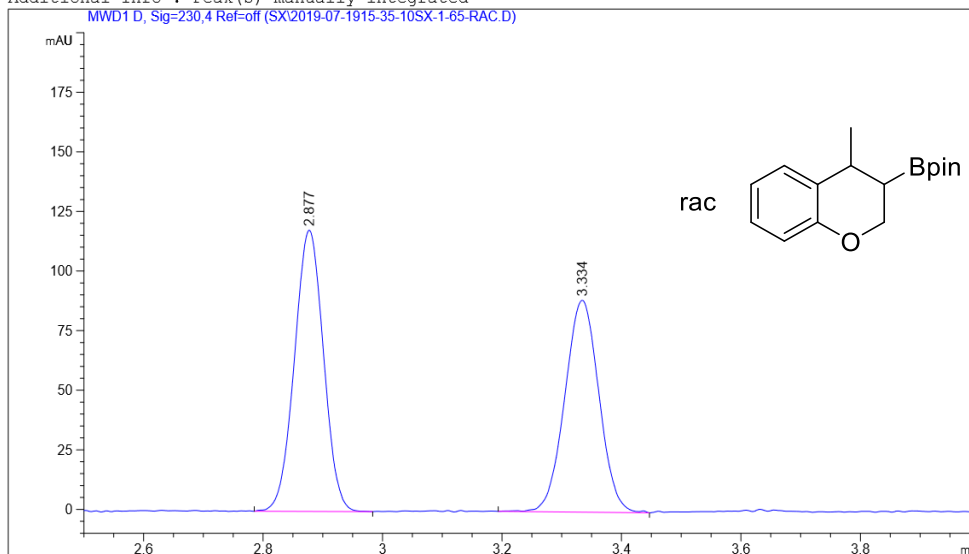

| Peak #   | RetTime [min] | Type | Width [min] | Area [mAU*s] | Height [mAU] | Area %  |
|----------|---------------|------|-------------|--------------|--------------|---------|
| 1        | 2.877         | BB   | 0.0529      | 398.44870    | 118.01991    | 53.0304 |
| 2        | 3.334         | VV R | 0.0628      | 352.91077    | 88.89848     | 46.9696 |
| Totals : |               |      |             | 751.35947    | 206.91840    |         |

Additional Info : Peak(s) manually integrated  
 MWD1 D, Sig=230,4 Ref=off (SX2019-07-1915-49-52SX-1-65-G.D)

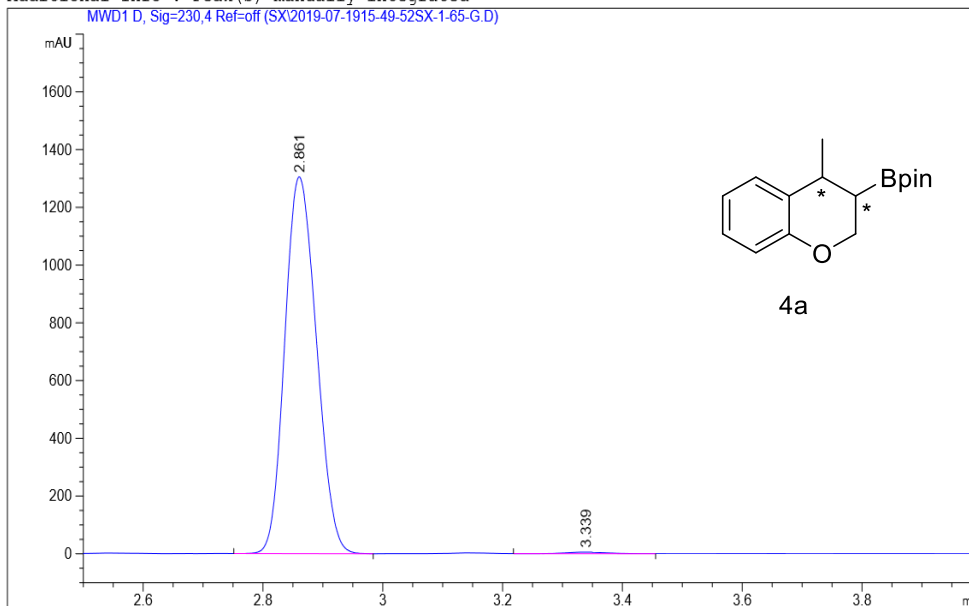

| Peak #   | RetTime [min] | Type | Width [min] | Area [mAU*s] | Height [mAU] | Area %  |
|----------|---------------|------|-------------|--------------|--------------|---------|
| 1        | 2.861         | VV R | 0.0588      | 4787.90186   | 1305.30164   | 99.4283 |
| 2        | 3.339         | VV R | 0.0608      | 27.52984     | 5.85816      | 0.5717  |
| Totals : |               |      |             | 4815.43170   | 1311.15979   |         |



Additional Info : Peak(s) manually integrated  
 MWD1 D, Sig=230,4 Ref=off (SX2019-07-0610-01-45SX-2-55-RAC.D)

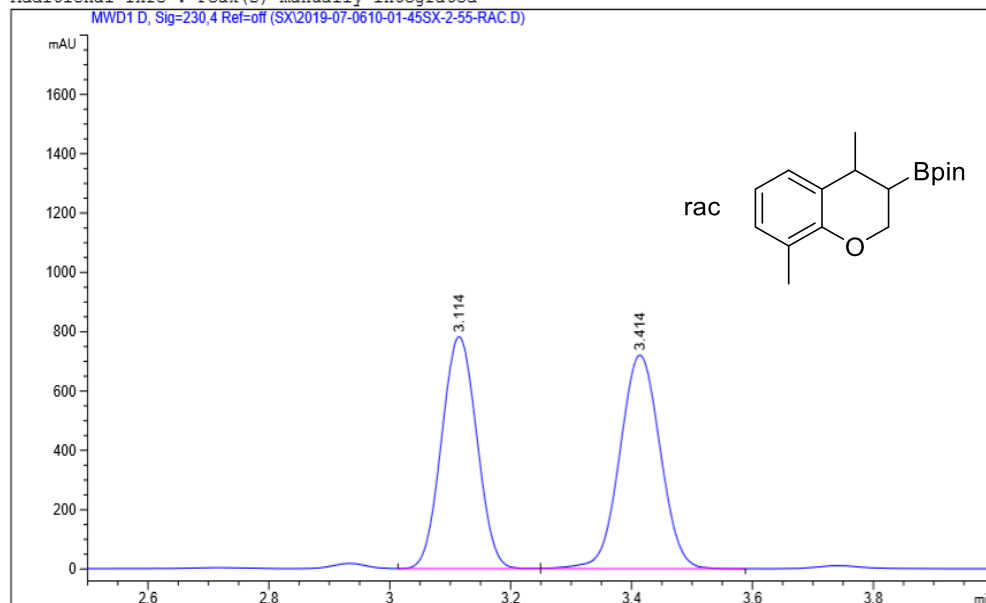

| Peak # | RetTime [min] | Type | Width [min] | Area [mAU*s] | Height [mAU] | Area %  |
|--------|---------------|------|-------------|--------------|--------------|---------|
| 1      | 3.114         | BV R | 0.0642      | 3167.29956   | 782.27649    | 48.6322 |
| 2      | 3.414         | VV R | 0.0727      | 3345.45605   | 720.32324    | 51.3678 |

Totals : 6512.75562 1502.59973

Additional Info : Peak(s) manually integrated  
 MWD1 D, Sig=230,4 Ref=off (SX2019-07-0610-14-43SX-2-55-G.D)

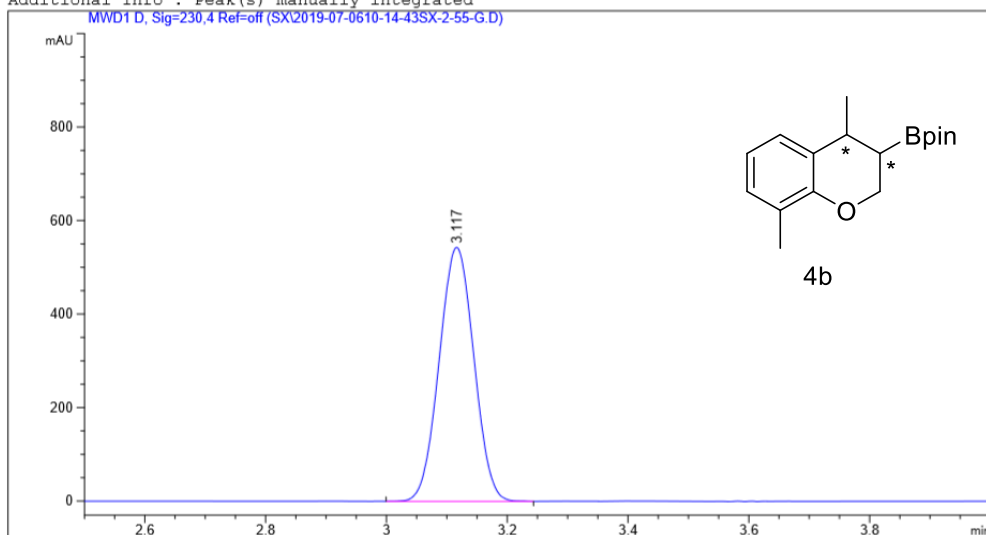

| Peak # | RetTime [min] | Type | Width [min] | Area [mAU*s] | Height [mAU] | Area %   |
|--------|---------------|------|-------------|--------------|--------------|----------|
| 1      | 3.117         | BV R | 0.0636      | 2169.33716   | 543.51385    | 100.0000 |

Totals : 2169.33716 543.51385

Additional Info : Peak(s) manually integrated

MWD1 D, Sig=230,4 Ref=off (SX2019-08-2110-37-44SX-2-0-1-2-RAC.D)

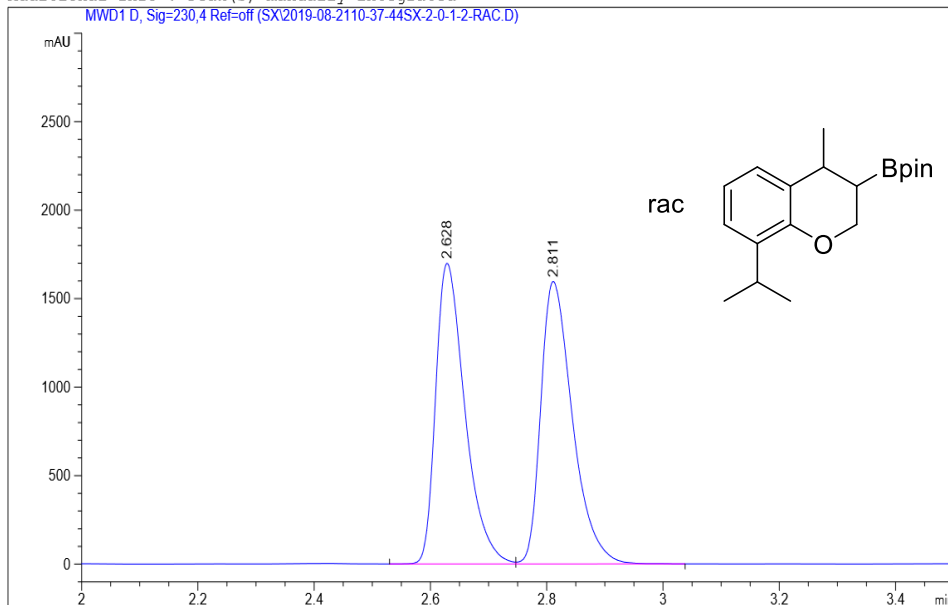

| Peak # | RetTime [min] | Type | Width [min] | Area [mAU*s] | Height [mAU] | Area %  |
|--------|---------------|------|-------------|--------------|--------------|---------|
| 1      | 2.628         | BV   | 0.0532      | 5928.97363   | 1698.82886   | 49.5415 |
| 2      | 2.811         | VB   | 0.0586      | 6038.72607   | 1595.83386   | 50.4585 |

Totals : 1.19677e4 3294.66272

Additional Info : Peak(s) manually integrated

MWD1 D, Sig=230,4 Ref=off (SX2019-08-2116-33-20SX-2-0-1-2-G.D)

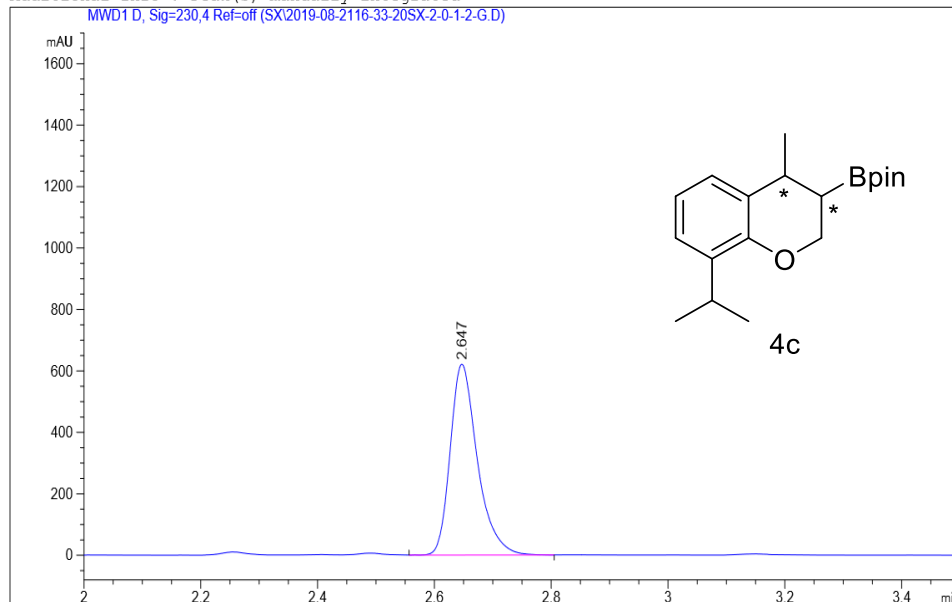

| Peak # | RetTime [min] | Type | Width [min] | Area [mAU*s] | Height [mAU] | Area %   |
|--------|---------------|------|-------------|--------------|--------------|----------|
| 1      | 2.647         | VB R | 0.0492      | 2007.78381   | 621.51477    | 100.0000 |

Totals : 2007.78381 621.51477

Additional Info : Peak(s) manually integrated

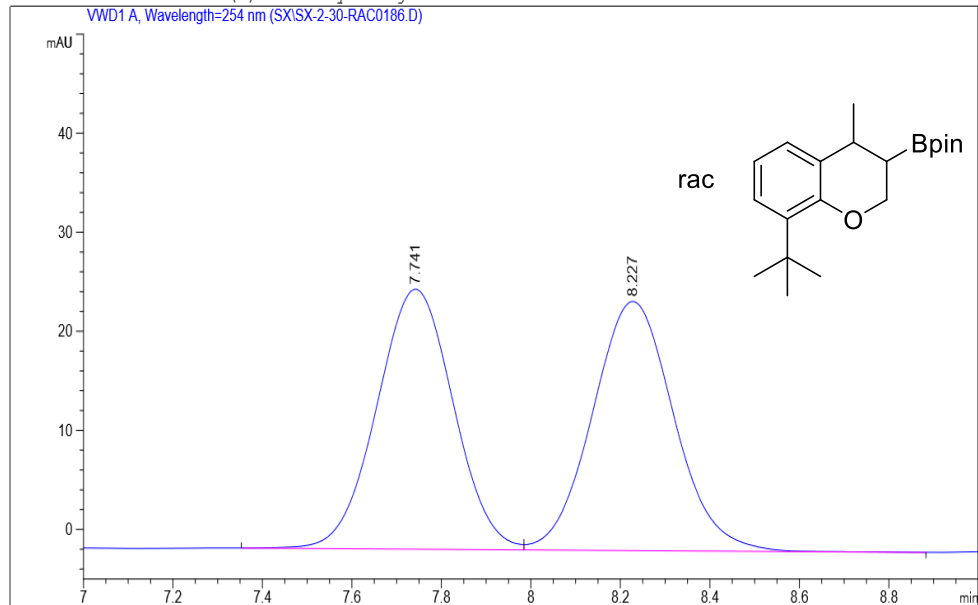

| Peak #   | RetTime [min] | Type | Width [min] | Area [mAU*s] | Height [mAU] | Area %  |
|----------|---------------|------|-------------|--------------|--------------|---------|
| 1        | 7.741         | BV   | 0.1867      | 311.91870    | 26.24359     | 49.5333 |
| 2        | 8.227         | VB   | 0.1964      | 317.79617    | 25.15459     | 50.4667 |
| Totals : |               |      |             | 629.71487    | 51.39818     |         |

Additional Info : Peak(s) manually integrated

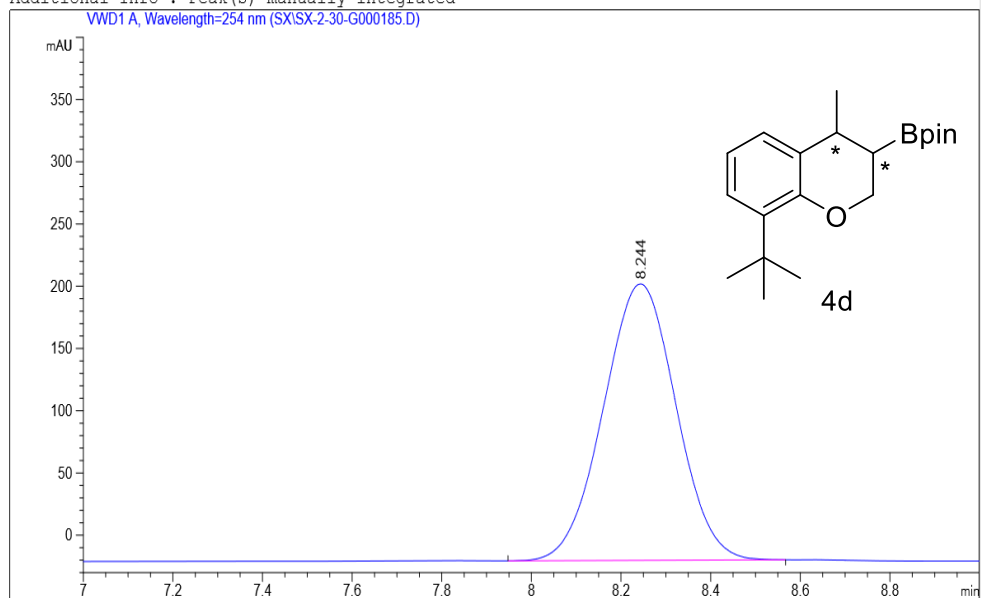

| Peak #   | RetTime [min] | Type | Width [min] | Area [mAU*s] | Height [mAU] | Area %   |
|----------|---------------|------|-------------|--------------|--------------|----------|
| 1        | 8.244         | BB   | 0.1764      | 2502.31494   | 222.10522    | 100.0000 |
| Totals : |               |      |             | 2502.31494   | 222.10522    |          |

Additional Info : Peak(s) manually integrated

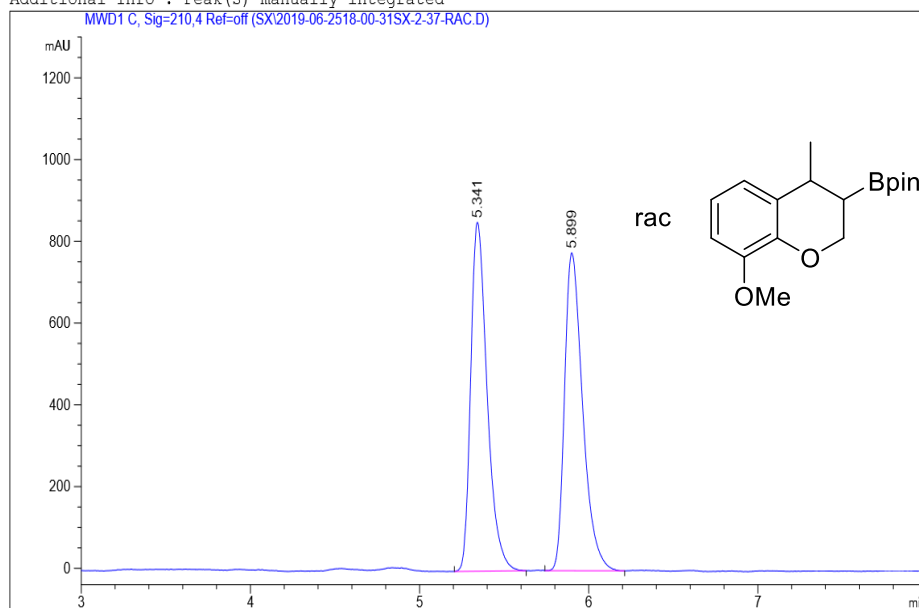

| Peak # | RetTime [min] | Type | Width [min] | Area [mAU*s] | Height [mAU] | Area %  |
|--------|---------------|------|-------------|--------------|--------------|---------|
| 1      | 5.341         | BV R | 0.1037      | 5754.85791   | 853.60388    | 49.8723 |
| 2      | 5.899         | VV R | 0.1138      | 5784.32568   | 777.74994    | 50.1277 |

Totals : 1.15392e4 1631.35382

Additional Info : Peak(s) manually integrated

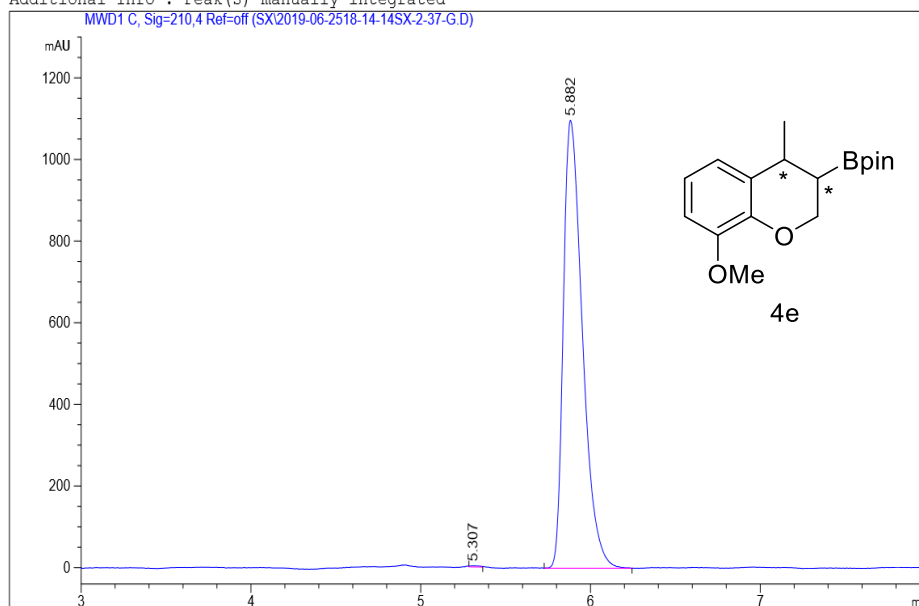

| Peak # | RetTime [min] | Type | Width [min] | Area [mAU*s] | Height [mAU] | Area %  |
|--------|---------------|------|-------------|--------------|--------------|---------|
| 1      | 5.307         | VV   | 0.0475      | 11.11751     | 2.85231      | 0.1293  |
| 2      | 5.882         | VV R | 0.1128      | 8587.05273   | 1097.82520   | 99.8707 |

Totals : 8598.17025 1100.67751

Additional Info : Peak(s) manually integrated  
MWD1 D, Sig=230,4 Ref-off (SX2019-07-1517-21-18SX-2-65-RAC.D)

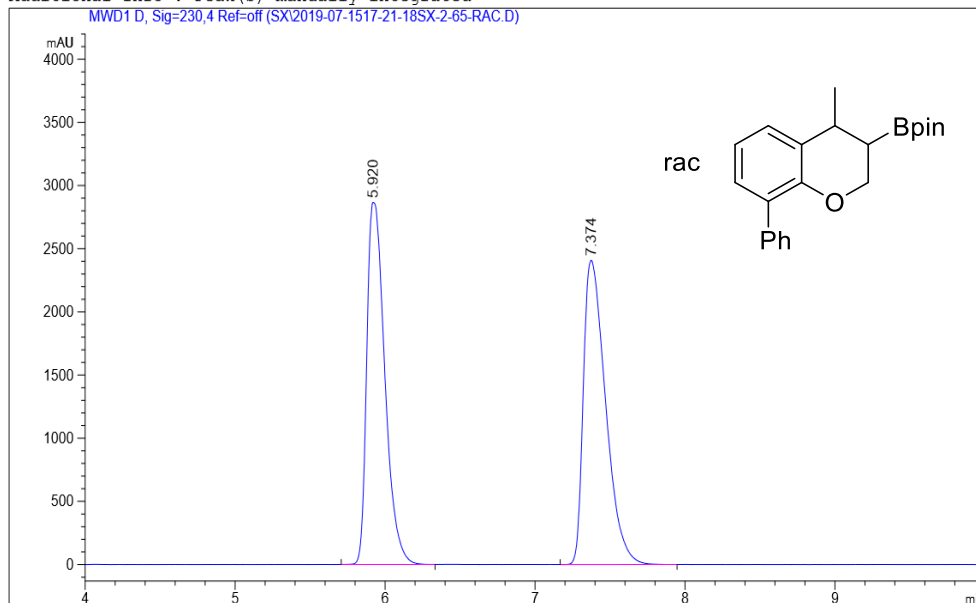

| Peak # | RetTime [min] | Type | Width [min] | Area [mAU*s] | Height [mAU] | Area %  |
|--------|---------------|------|-------------|--------------|--------------|---------|
| 1      | 5.920         | VV R | 0.1102      | 2.38807e4    | 2866.53687   | 49.0752 |
| 2      | 7.374         | VV R | 0.1566      | 2.47808e4    | 2408.00488   | 50.9248 |

Totals : 4.86615e4 5274.54175

Additional Info : Peak(s) manually integrated  
MWD1 D, Sig=230,4 Ref-off (SX2019-07-1517-35-51SX-2-65-G.D)

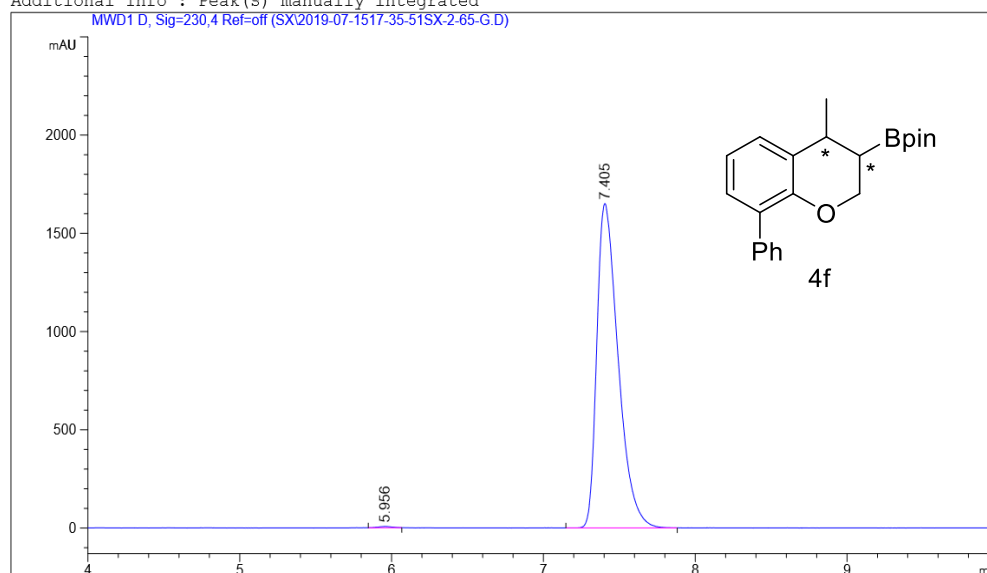

| Peak # | RetTime [min] | Type | Width [min] | Area [mAU*s] | Height [mAU] | Area %  |
|--------|---------------|------|-------------|--------------|--------------|---------|
| 1      | 5.956         | VV R | 0.0820      | 42.49166     | 6.69762      | 0.2635  |
| 2      | 7.405         | VV R | 0.1492      | 1.60848e4    | 1650.57251   | 99.7365 |

Totals : 1.61273e4 1657.27013

Additional Info : Peak(s) manually integrated

MWD1 D, Sig=230,4 Ref=off (SX2019-07-1911-18-06SX-2-69-rac.D)

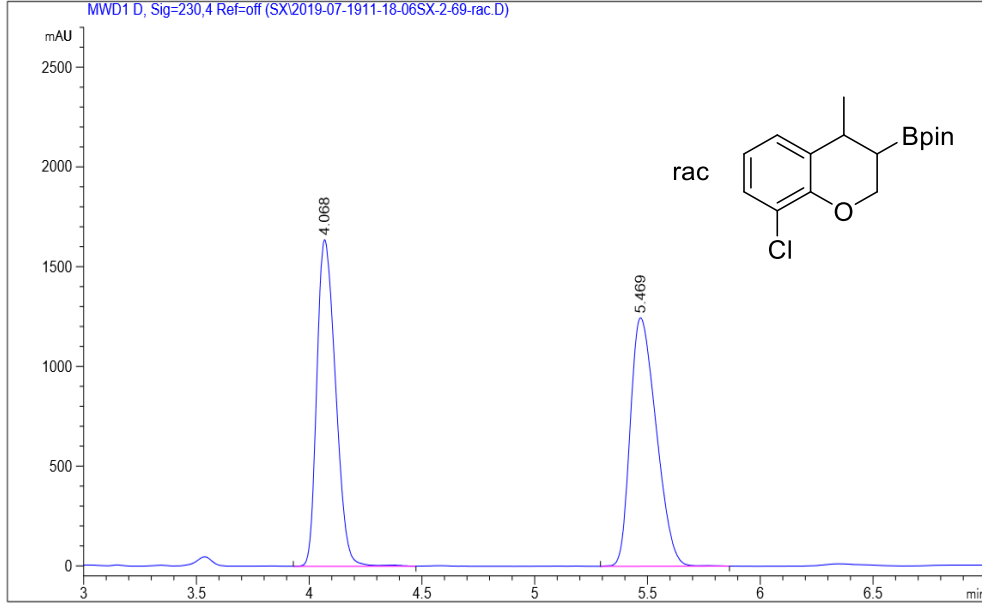

| Peak # | RetTime [min] | Type | Width [min] | Area [mAU*s] | Height [mAU] | Area %  |
|--------|---------------|------|-------------|--------------|--------------|---------|
| 1      | 4.068         | BV R | 0.0916      | 9446.93262   | 1636.93909   | 48.7358 |
| 2      | 5.469         | VV R | 0.1239      | 9937.03223   | 1246.15002   | 51.2642 |

Totals : 1.93840e4 2883.08911

Additional Info : Peak(s) manually integrated

MWD1 D, Sig=230,4 Ref=off (SX2019-07-1911-33-58SX-2-69-G.D)

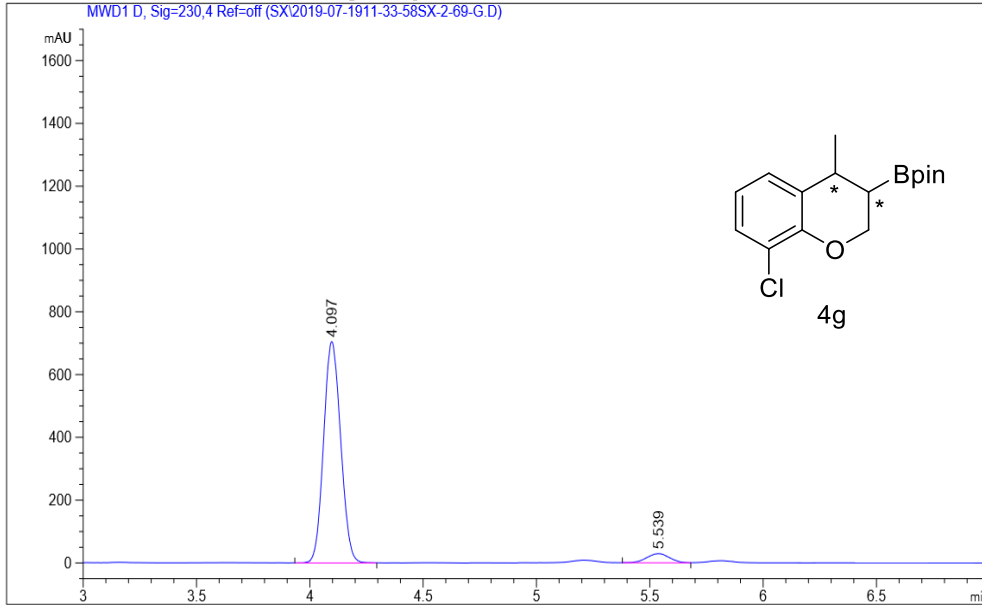

| Peak # | RetTime [min] | Type | Width [min] | Area [mAU*s] | Height [mAU] | Area %  |
|--------|---------------|------|-------------|--------------|--------------|---------|
| 1      | 4.097         | VV R | 0.0826      | 3689.90381   | 704.89227    | 94.7663 |
| 2      | 5.539         | VB R | 0.0981      | 203.78479    | 29.31461     | 5.2337  |

Totals : 3893.68860 734.20688

Additional Info : Peak(s) manually integrated  
 MWD1 B, Sig=254,4 Ref-off (SX2019-07-1910-26-58SX-3-1-RAC.D)

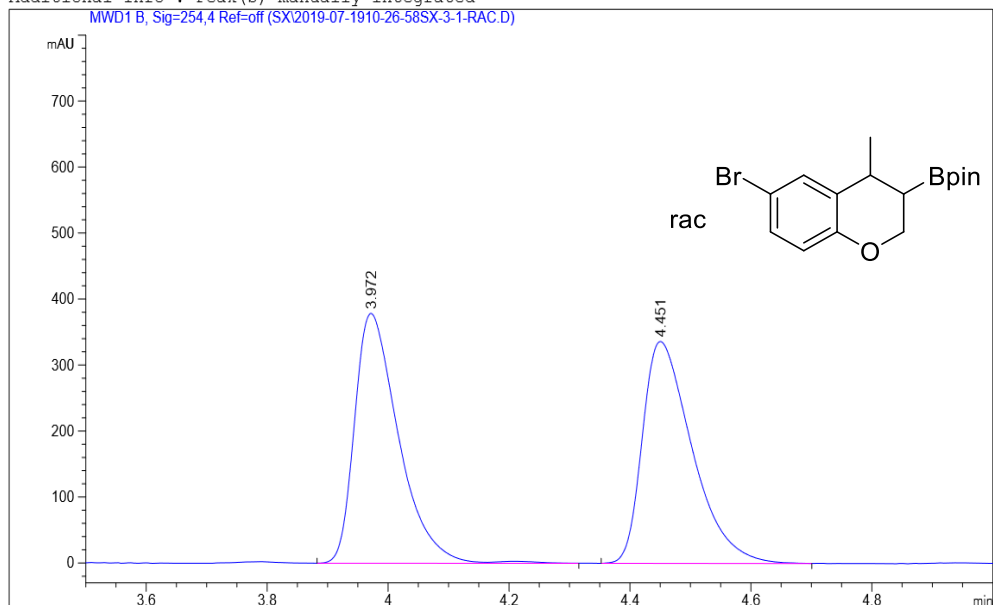

| Peak # | RetTime [min] | Type | Width [min] | Area [mAU*s] | Height [mAU] | Area %  |
|--------|---------------|------|-------------|--------------|--------------|---------|
| 1      | 3.972         | BV R | 0.0771      | 1916.52222   | 378.67670    | 49.9353 |
| 2      | 4.451         | BV R | 0.0876      | 1921.49011   | 336.39191    | 50.0647 |

Totals : 3838.01233 715.06860

Additional Info : Peak(s) manually integrated  
 MWD1 B, Sig=254,4 Ref-off (SX2019-07-1910-41-42SX-3-1-G.D)

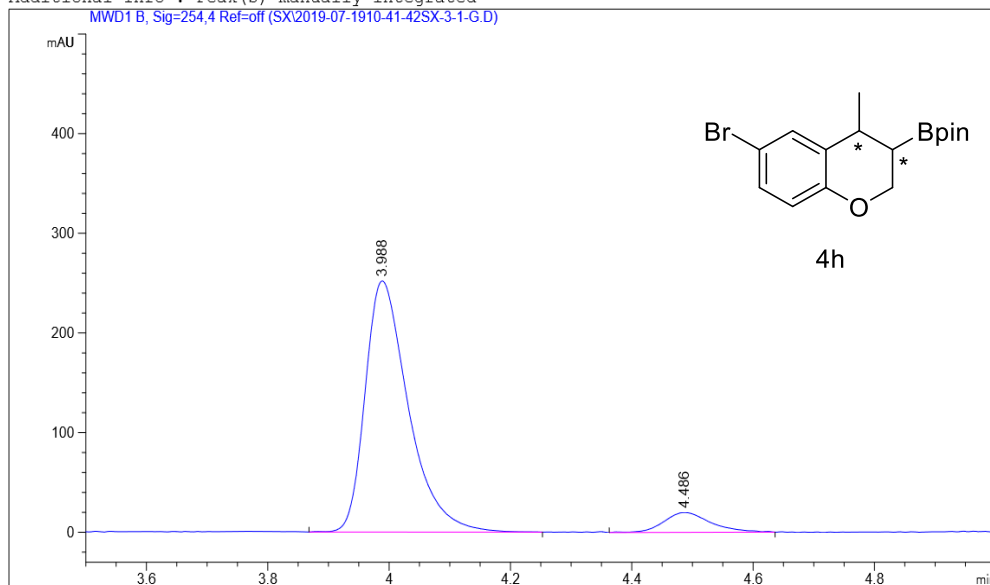

| Peak # | RetTime [min] | Type | Width [min] | Area [mAU*s] | Height [mAU] | Area %  |
|--------|---------------|------|-------------|--------------|--------------|---------|
| 1      | 3.988         | VV R | 0.0743      | 1248.28442   | 252.01712    | 92.0258 |
| 2      | 4.486         | VV R | 0.0768      | 108.16631    | 20.07981     | 7.9742  |

Totals : 1356.45074 272.09694

Additional Info : Peak(s) manually integrated

VWD1 A, Wavelength=254 nm (WXX\WXX-7-13001021.D)

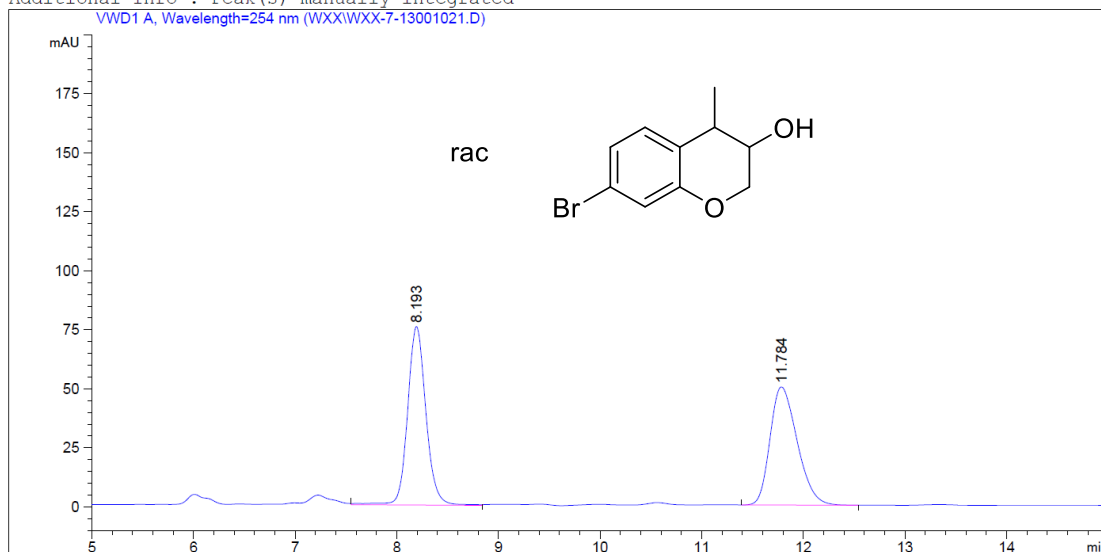

| Peak # | RetTime [min] | Type | Width [min] | Area [mAU*s] | Height [mAU] | Area %  |
|--------|---------------|------|-------------|--------------|--------------|---------|
| 1      | 8.193         | VV   | 0.1950      | 951.65906    | 75.52600     | 50.6427 |
| 2      | 11.784        | BB   | 0.2884      | 927.50610    | 50.00571     | 49.3573 |

Totals : 1879.16516 125.53171

Additional Info : Peak(s) manually integrated

VWD1 A, Wavelength=254 nm (WXX\WXX-7-18001036.D)

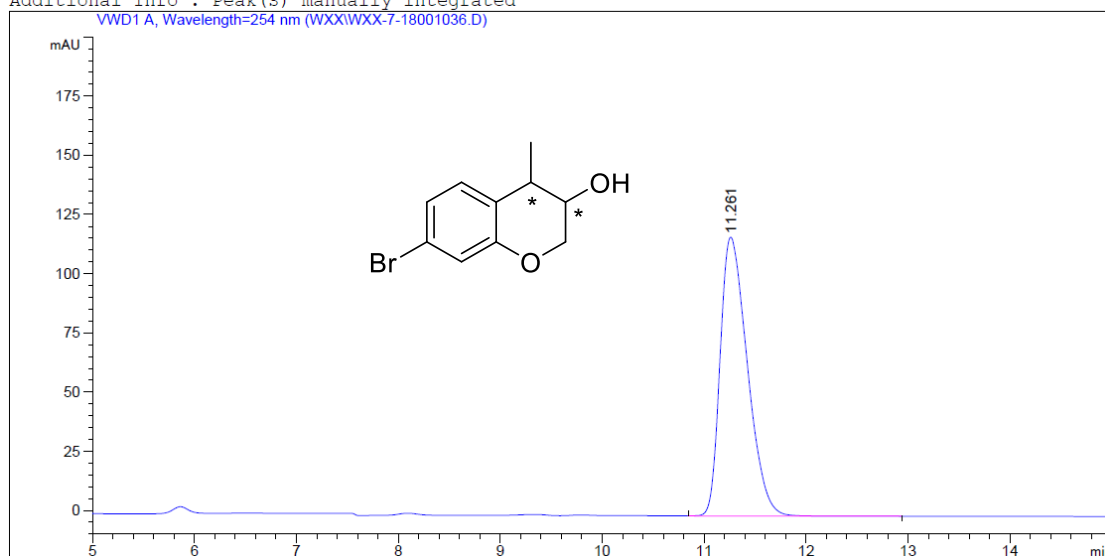

| Peak # | RetTime [min] | Type | Width [min] | Area [mAU*s] | Height [mAU] | Area %   |
|--------|---------------|------|-------------|--------------|--------------|----------|
| 1      | 11.261        | VB   | 0.2880      | 2179.18311   | 117.69168    | 100.0000 |

Totals : 2179.18311 117.69168



Additional Info : Peak(s) manually integrated

MWD1 D, Sig=230,4 Ref=off (SX\2019-07-1916-00-58SX-2-49-RAC.D)

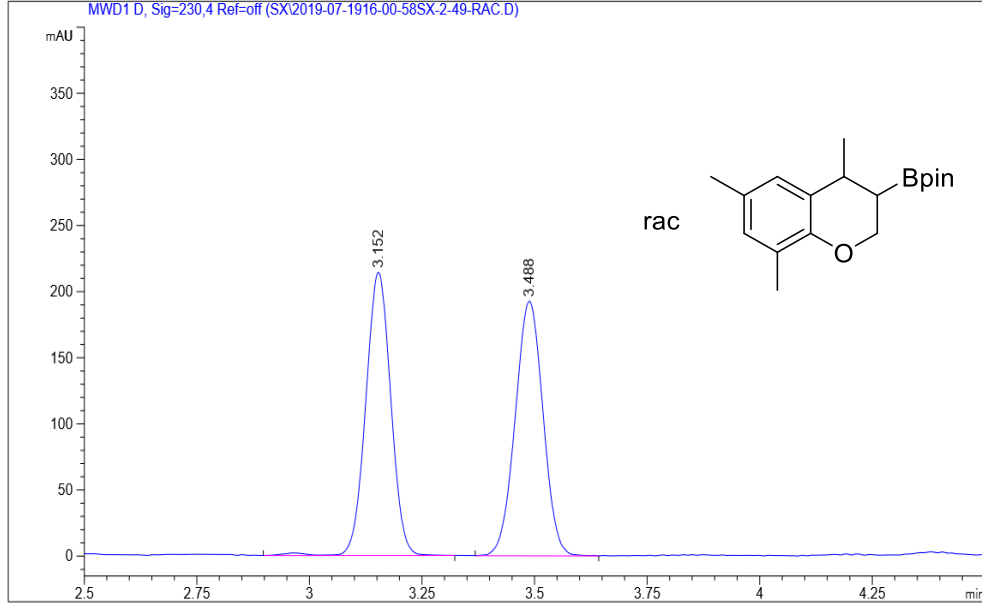

| Peak # | RetTime [min] | Type | Width [min] | Area [mAU*s] | Height [mAU] | Area %  |
|--------|---------------|------|-------------|--------------|--------------|---------|
| 1      | 3.152         | VV R | 0.0603      | 830.64777    | 214.20097    | 50.0507 |
| 2      | 3.488         | BV R | 0.0677      | 828.96552    | 192.53253    | 49.9493 |

Totals : 1659.61328 406.73351

Additional Info : Peak(s) manually integrated

MWD1 D, Sig=230,4 Ref=off (SX\2019-07-1916-14-55SX-2-49-G.D)

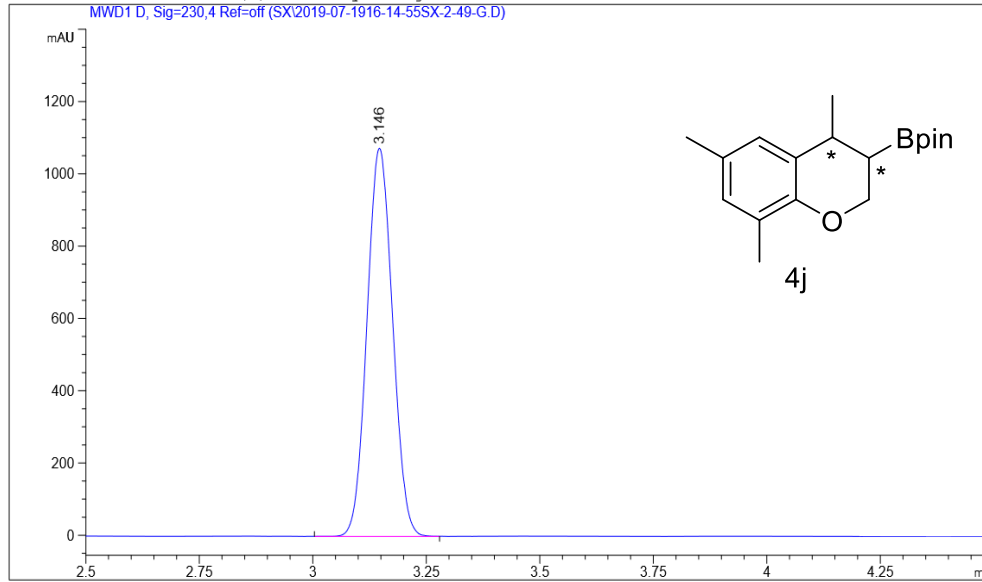

| Peak # | RetTime [min] | Type | Width [min] | Area [mAU*s] | Height [mAU] | Area %   |
|--------|---------------|------|-------------|--------------|--------------|----------|
| 1      | 3.146         | VV R | 0.0612      | 4207.89600   | 1073.86365   | 100.0000 |

Totals : 4207.89600 1073.86365

Additional Info : Peak(s) manually integrated  
MWD1 D, Sig=230,4 Ref=off (SX2019-06-1721-51-09SX-2-38-RAC.D)

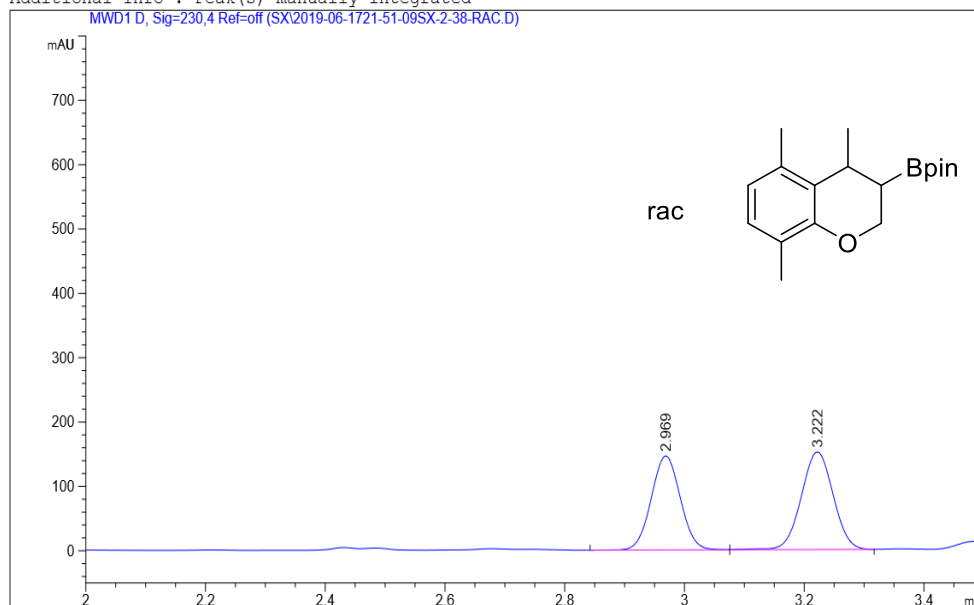

| Peak # | RetTime [min] | Type | Width [min] | Area [mAU*s] | Height [mAU] | Area %  |
|--------|---------------|------|-------------|--------------|--------------|---------|
| 1      | 2.969         | BB   | 0.0528      | 491.87753    | 146.15196    | 46.7430 |
| 2      | 3.222         | VB R | 0.0576      | 560.42511    | 151.61177    | 53.2570 |

Totals : 1052.30264 297.76373

Additional Info : Peak(s) manually integrated  
MWD1 D, Sig=230,4 Ref=off (SX2019-06-1720-19-05SX-2-38-G.D)

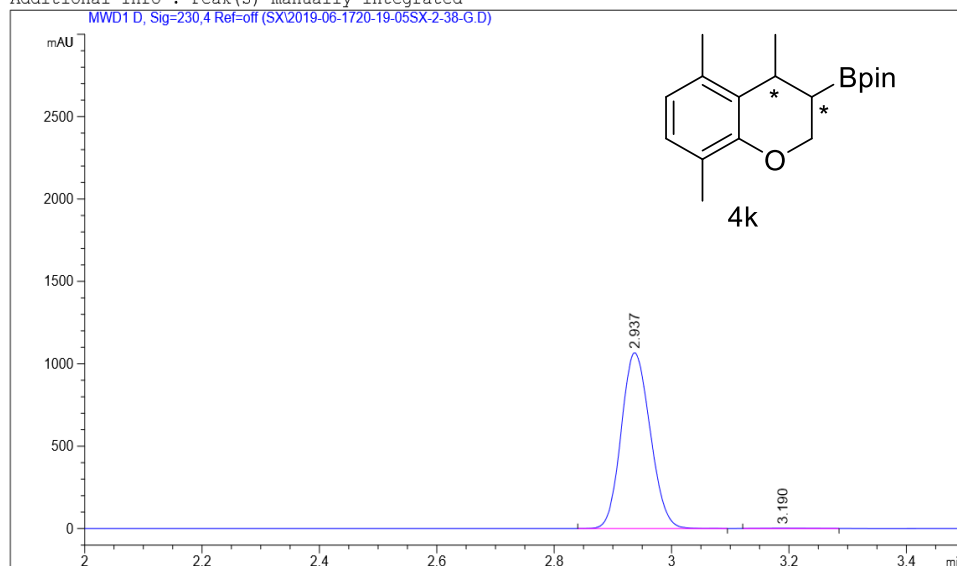

| Peak # | RetTime [min] | Type | Width [min] | Area [mAU*s] | Height [mAU] | Area %  |
|--------|---------------|------|-------------|--------------|--------------|---------|
| 1      | 2.937         | BV R | 0.0540      | 3654.46167   | 1066.58069   | 99.7853 |
| 2      | 3.190         | BV R | 0.0471      | 7.86413      | 2.12698      | 0.2147  |

Totals : 3662.32580 1068.70766

Additional Info : Peak(s) manually integrated  
 MWD1 B, Sig=254,4 Ref=off (SX2019-07-2614-55-33SX-3-6-RAC.D)

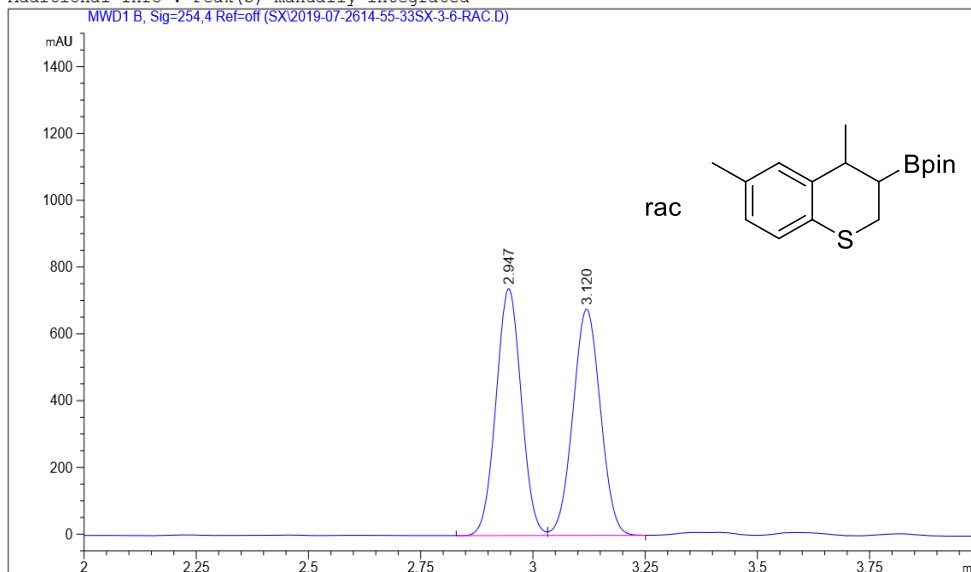

| Peak # | RetTime [min] | Type | Width [min] | Area [mAU*s] | Height [mAU] | Area %  |
|--------|---------------|------|-------------|--------------|--------------|---------|
| 1      | 2.947         | BV   | 0.0612      | 2894.19116   | 739.45544    | 50.0840 |
| 2      | 3.120         | VV R | 0.0667      | 2884.47852   | 677.69769    | 49.9160 |

Totals : 5778.66968 1417.15314

Additional Info : Peak(s) manually integrated  
 MWD1 B, Sig=254,4 Ref=off (SX2019-07-2615-15-21SX-3-6-G.D)

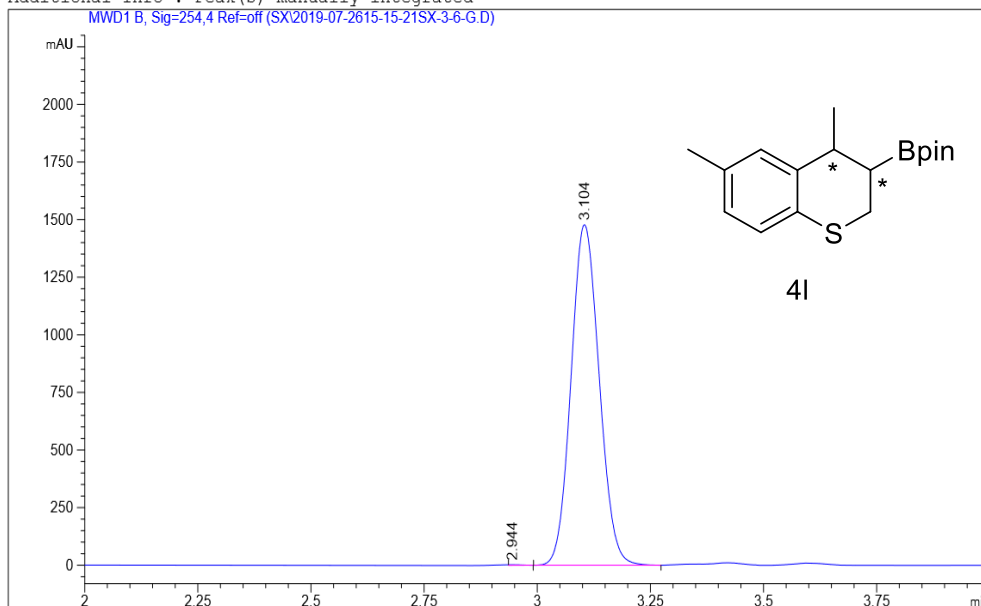

| Peak # | RetTime [min] | Type | Width [min] | Area [mAU*s] | Height [mAU] | Area %  |
|--------|---------------|------|-------------|--------------|--------------|---------|
| 1      | 2.944         | VB   | 0.0277      | 4.73446      | 2.61115      | 0.0741  |
| 2      | 3.104         | BB   | 0.0679      | 6386.38184   | 1478.07861   | 99.9259 |

Totals : 6391.11630 1480.68976

Additional Info : Peak(s) manually integrated

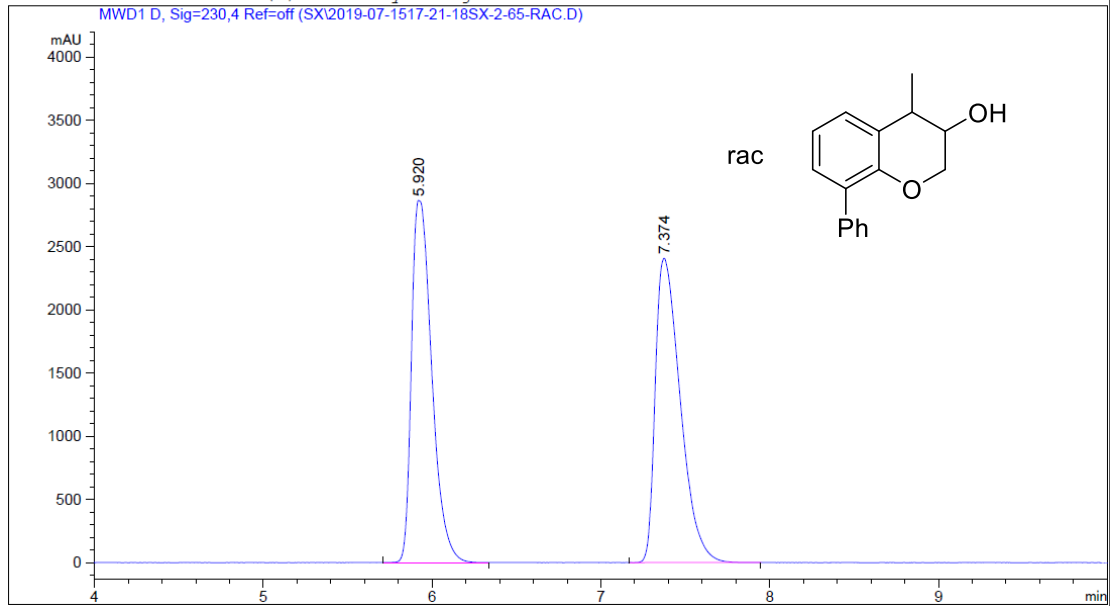

| Peak # | RetTime [min] | Type | Width [min] | Area [mAU*s] | Height [mAU] | Area %  |
|--------|---------------|------|-------------|--------------|--------------|---------|
| 1      | 5.920         | VV R | 0.1102      | 2.38807e4    | 2866.53687   | 49.0752 |
| 2      | 7.374         | VV R | 0.1566      | 2.47808e4    | 2408.00488   | 50.9248 |

Totals : 4.86615e4 5274.54175

Additional Info : Peak(s) manually integrated

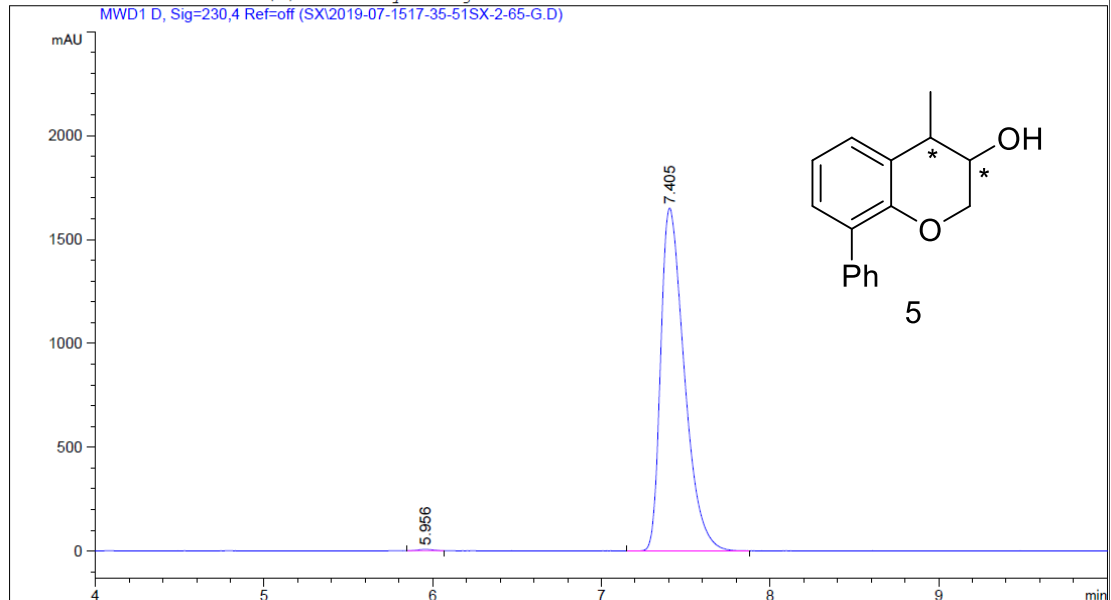

| Peak # | RetTime [min] | Type | Width [min] | Area [mAU*s] | Height [mAU] | Area %  |
|--------|---------------|------|-------------|--------------|--------------|---------|
| 1      | 5.956         | VV R | 0.0820      | 42.49166     | 6.69762      | 0.2635  |
| 2      | 7.405         | VV R | 0.1492      | 1.60848e4    | 1650.57251   | 99.7365 |

Totals : 1.61273e4 1657.27013

Additional Info : Peak(s) manually integrated

MWD1 B, Sig=254,4 Ref=off (SX12020-10-1313-18-03SX-5-58-RAC.D)

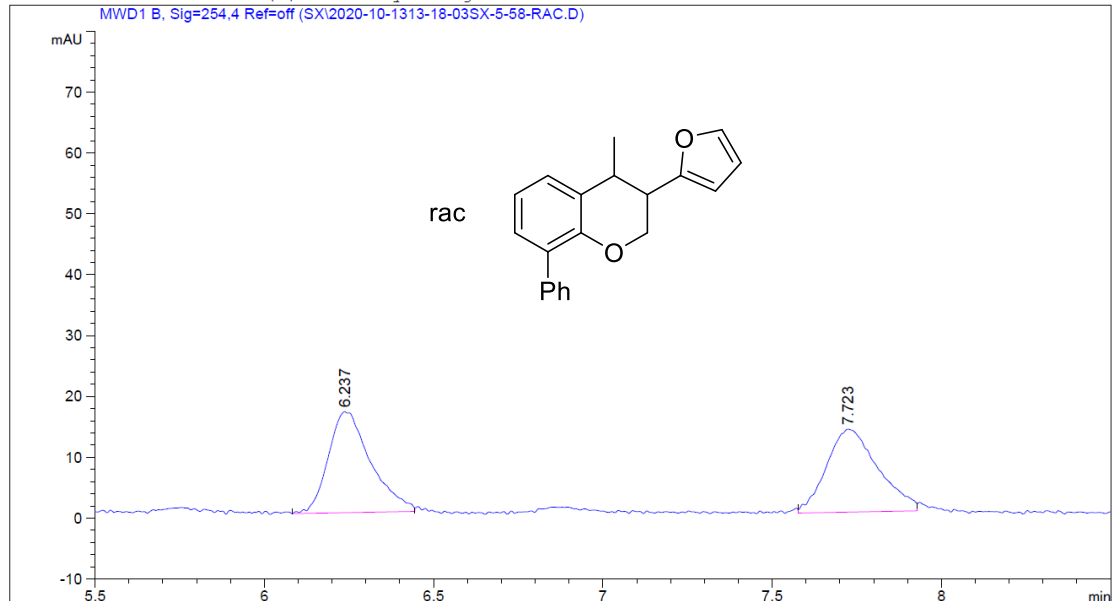

| Peak # | RetTime [min] | Type | Width [min] | Area [mAU*s] | Height [mAU] | Area %  |
|--------|---------------|------|-------------|--------------|--------------|---------|
| 1      | 6.237         | BV   | 0.1165      | 144.47655    | 16.61224     | 50.0855 |
| 2      | 7.723         | VV   | 0.1343      | 143.98346    | 13.62382     | 49.9145 |

Totals : 288.46001 30.23606

Additional Info : Peak(s) manually integrated

MWD1 C, Sig=210,4 Ref=off (SX12020-10-1313-32-09SX-5-58-G.D)

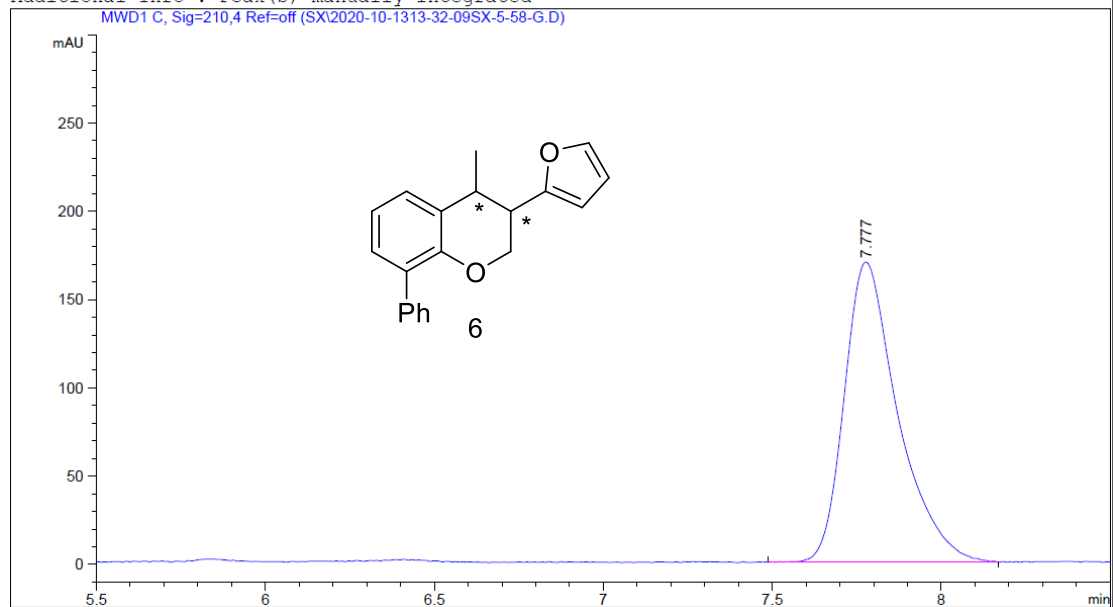

| Peak # | RetTime [min] | Type | Width [min] | Area [mAU*s] | Height [mAU] | Area %   |
|--------|---------------|------|-------------|--------------|--------------|----------|
| 1      | 7.777         | BB   | 0.1649      | 1877.60864   | 169.98178    | 100.0000 |

Totals : 1877.60864 169.98178

Additional Info : Peak(s) manually integrated

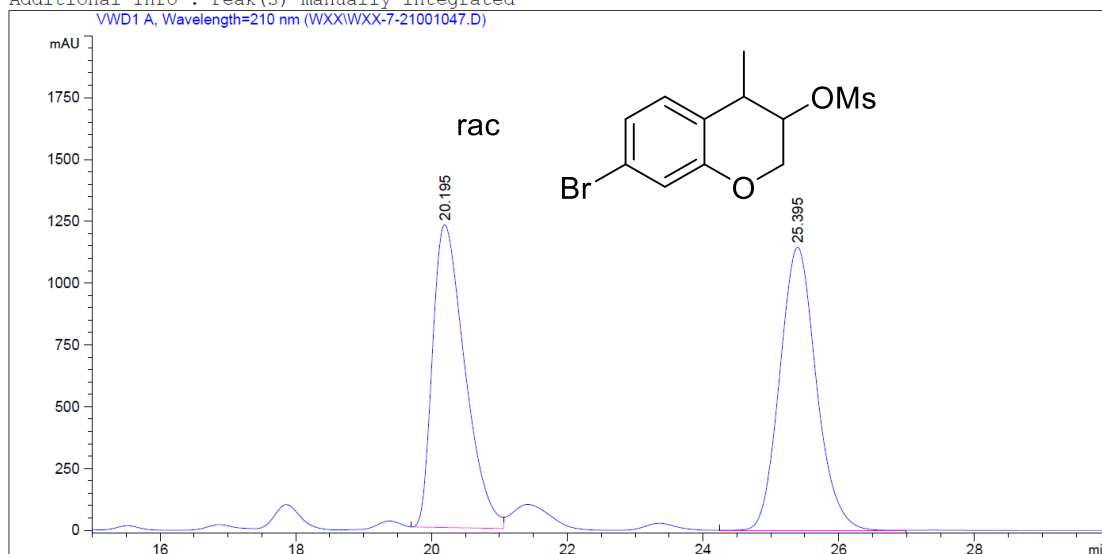

| Peak # | RetTime [min] | Type | Width [min] | Area [mAU*s] | Height [mAU] | Area %  |
|--------|---------------|------|-------------|--------------|--------------|---------|
| 1      | 20.195        | BV   | 0.5093      | 4.04768e4    | 1225.46301   | 48.5988 |
| 2      | 25.395        | BB   | 0.5772      | 4.28108e4    | 1145.07361   | 51.4012 |

Totals : 8.32876e4 2370.53662

Additional Info : Peak(s) manually integrated

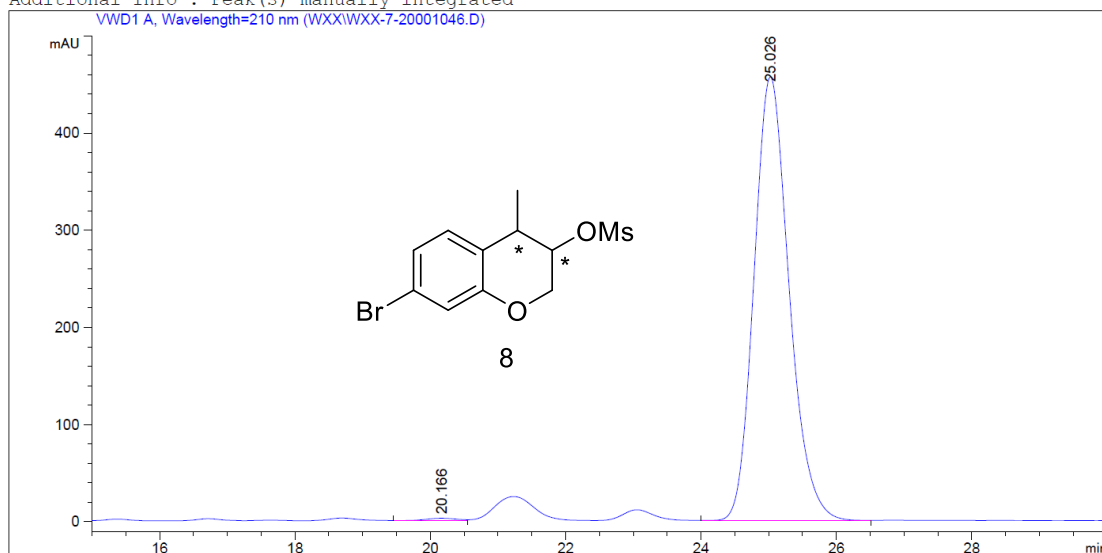

| Peak # | RetTime [min] | Type | Width [min] | Area [mAU*s] | Height [mAU] | Area %  |
|--------|---------------|------|-------------|--------------|--------------|---------|
| 1      | 20.166        | BV   | 0.4638      | 73.27442     | 2.36959      | 0.4445  |
| 2      | 25.026        | BB   | 0.5544      | 1.64112e4    | 456.56659    | 99.5555 |

Totals : 1.64845e4 458.93618

Additional Info : Peak(s) manually integrated

VWD1 A, Wavelength=210 nm (WXXIWXX-OTS001041.D)

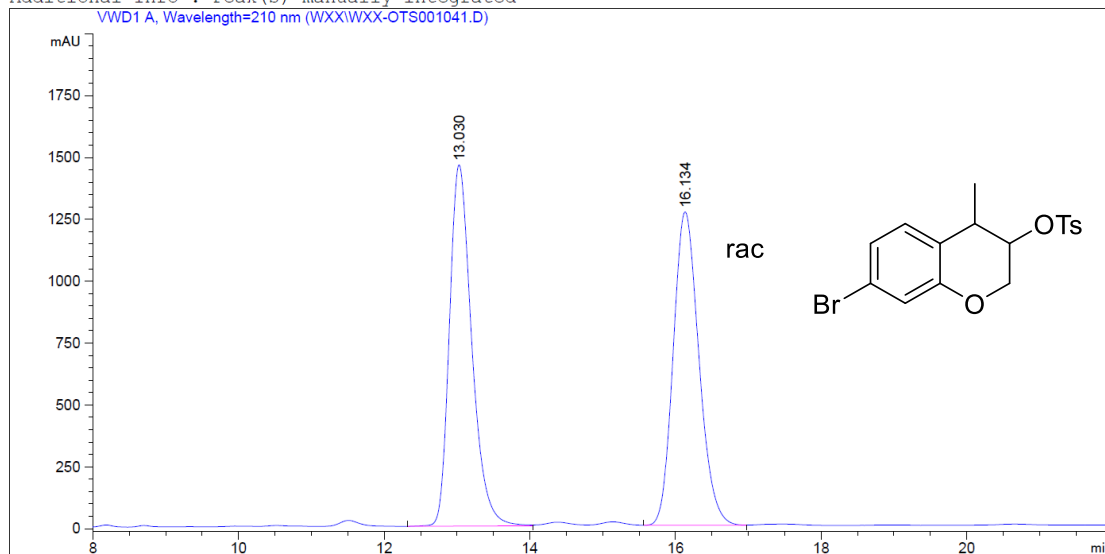

| Peak # | RetTime [min] | Type | Width [min] | Area [mAU*s] | Height [mAU] | Area %  |
|--------|---------------|------|-------------|--------------|--------------|---------|
| 1      | 13.030        | BV   | 0.3250      | 3.10173e4    | 1459.29297   | 50.0124 |
| 2      | 16.134        | BV   | 0.3796      | 3.10018e4    | 1266.39172   | 49.9876 |

Totals : 6.20191e4 2725.68469

Additional Info : Peak(s) manually integrated

VWD1 A, Wavelength=210 nm (WXXIWXX-OTS001044.D)

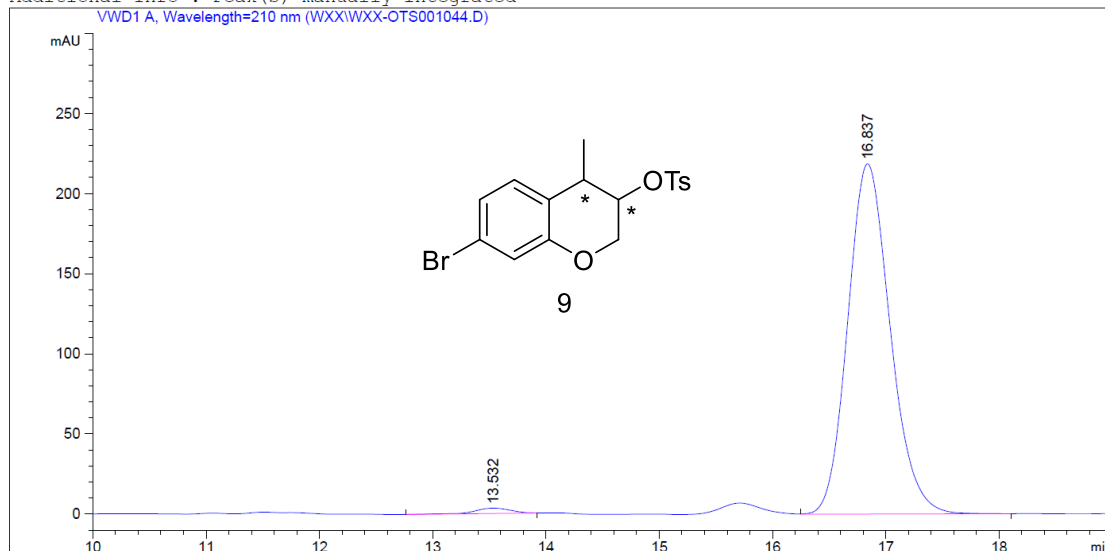

| Peak # | RetTime [min] | Type | Width [min] | Area [mAU*s] | Height [mAU] | Area %  |
|--------|---------------|------|-------------|--------------|--------------|---------|
| 1      | 13.532        | BB   | 0.3401      | 72.00000     | 3.33219      | 1.2506  |
| 2      | 16.837        | VB   | 0.4025      | 5685.14551   | 218.52538    | 98.7494 |

Totals : 5757.14551 221.85756

## 10. Figures of single-crystals

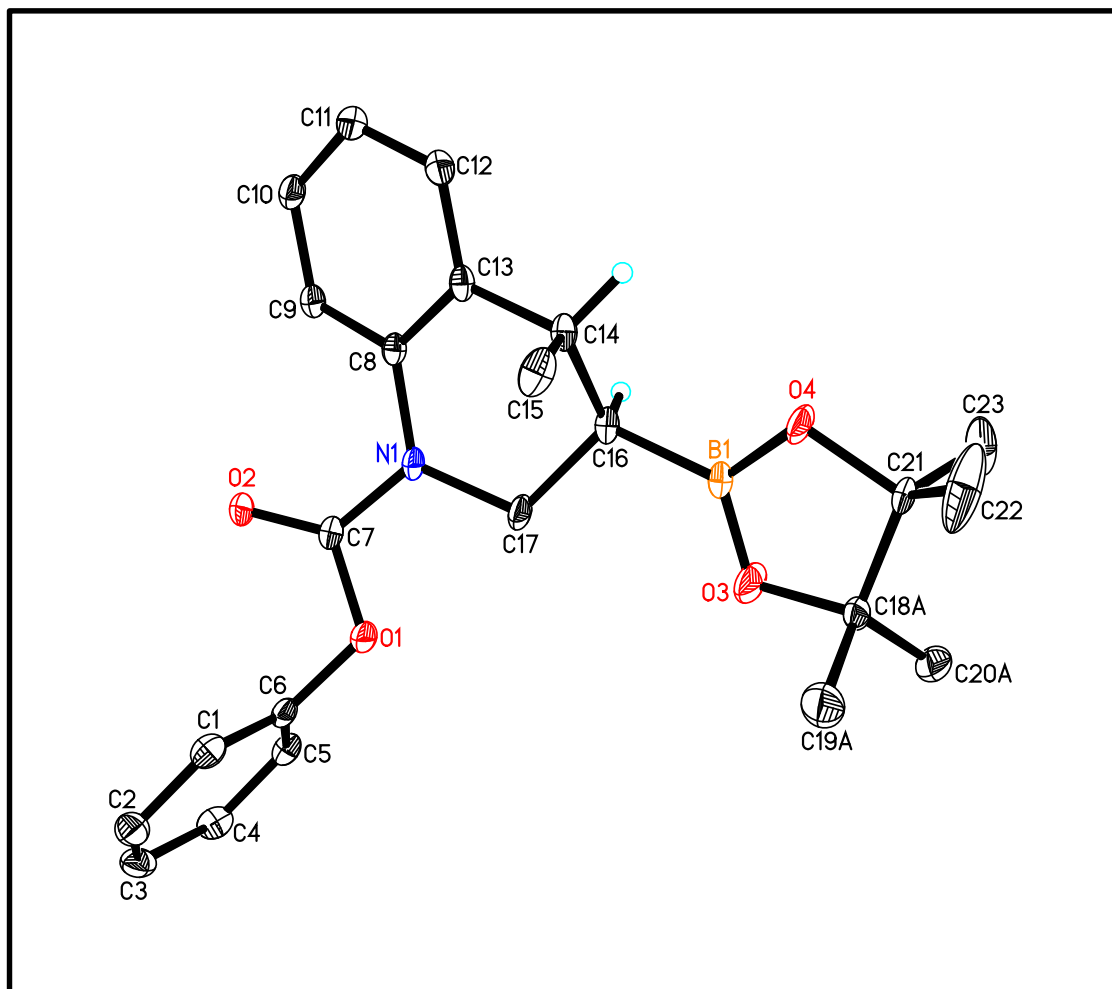

Figure S1. Structure of compound 2i.

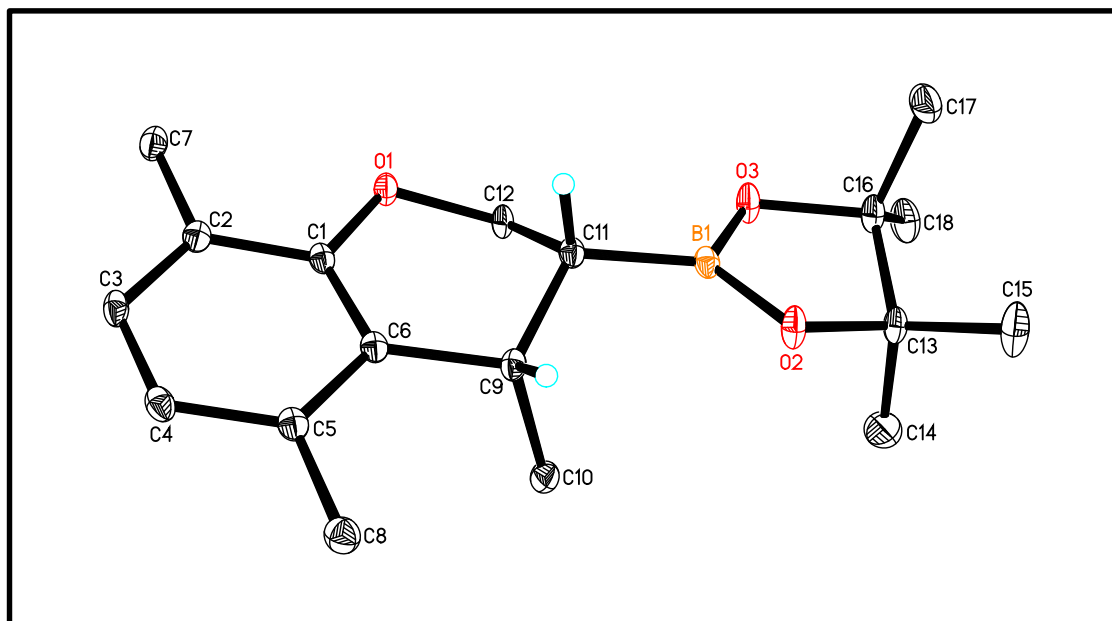

Figure S2. Structure of compound 4j.
